# Supplementary material for: Dysregulation of miR-381-3p and miR-23b-3p in skeletal muscle could be a possible estimator of early post-mortem interval in rats
Source: PeerJ. 2021 Apr 27;9:e11102. doi: 10.7717/peerj.11102 (PMC8086579; doi:10.7717/peerj.11102)
Supplement: Supplemental Information 1 — With the different miRNAs bioinformatic databases (see material and methods), we show the target genes of miR-381-3p and miR-23b-3p. [file peerj-09-11102-s001.xlsx]

## Sheet: mir-381
mature_mirna_acc	mature_mirna_id	target_symbol	target_entrez	target_ensembl	experiment	support_type	pubmed_id	type	score	database
MIMAT0003199	rno-miR-381-3p	Cacna1c	24239	ENSRNOG00000007090	NA	NA	NA	predicted	0.876	elmmo
MIMAT0003199	rno-miR-381-3p	Rybp		ENSRNOG00000005353	NA	NA	NA	predicted	0.876	elmmo
MIMAT0003199	rno-miR-381-3p	Scaf8	245926	ENSRNOG00000016919	NA	NA	NA	predicted	0.876	elmmo
MIMAT0003199	rno-miR-381-3p	Hbp1	27080	ENSRNOG00000008927	NA	NA	NA	predicted	0.876	elmmo
MIMAT0003199	rno-miR-381-3p	Sephs1	291314	ENSRNOG00000018125	NA	NA	NA	predicted	0.876	elmmo
MIMAT0003199	rno-miR-381-3p	Pds5b	304218	ENSRNOG00000001098	NA	NA	NA	predicted	0.876	elmmo
MIMAT0003199	rno-miR-381-3p	Zfpm2	314930	ENSRNOG00000004109	NA	NA	NA	predicted	0.876	elmmo
MIMAT0003199	rno-miR-381-3p	Pdap1	64527	ENSRNOG00000000990	NA	NA	NA	predicted	0.876	elmmo
MIMAT0003199	rno-miR-381-3p	Epc1	100362678	ENSRNOG00000014834	NA	NA	NA	predicted	0.876	elmmo
MIMAT0003199	rno-miR-381-3p	Eif4g2	361628	ENSRNOG00000017158	NA	NA	NA	predicted	0.855	elmmo
MIMAT0003199	rno-miR-381-3p	Trim63	140939	ENSRNOG00000016543	NA	NA	NA	predicted	0.855	elmmo
MIMAT0003199	rno-miR-381-3p	R3hdm1	304763	ENSRNOG00000004099	NA	NA	NA	predicted	0.855	elmmo
MIMAT0003199	rno-miR-381-3p	Nampt	297508	ENSRNOG00000009754	NA	NA	NA	predicted	0.855	elmmo
MIMAT0003199	rno-miR-381-3p	St5	308944	ENSRNOG00000013934	NA	NA	NA	predicted	0.855	elmmo
MIMAT0003199	rno-miR-381-3p	Cnbp	64530	ENSRNOG00000010239	NA	NA	NA	predicted	0.855	elmmo
MIMAT0003199	rno-miR-381-3p	Hnrnpr	319110	ENSRNOG00000011910	NA	NA	NA	predicted	0.855	elmmo
MIMAT0003199	rno-miR-381-3p	Gpr158	291352	ENSRNOG00000024832	NA	NA	NA	predicted	0.855	elmmo
MIMAT0003199	rno-miR-381-3p	Tfap2b	301285	ENSRNOG00000011823	NA	NA	NA	predicted	0.855	elmmo
MIMAT0003199	rno-miR-381-3p	Zfhx4	310250	ENSRNOG00000008765	NA	NA	NA	predicted	0.855	elmmo
MIMAT0003199	rno-miR-381-3p	Pnrc1	286988	ENSRNOG00000007793	NA	NA	NA	predicted	0.855	elmmo
MIMAT0003199	rno-miR-381-3p	Pias1	300772	ENSRNOG00000034272	NA	NA	NA	predicted	0.855	elmmo
MIMAT0003199	rno-miR-381-3p	Med13	303403	ENSRNOG00000003679	NA	NA	NA	predicted	0.855	elmmo
MIMAT0003199	rno-miR-381-3p	Dll4	311332	ENSRNOG00000014011	NA	NA	NA	predicted	0.855	elmmo
MIMAT0003199	rno-miR-381-3p	Cdc73	304832	ENSRNOG00000003258	NA	NA	NA	predicted	0.855	elmmo
MIMAT0003199	rno-miR-381-3p	Cnot6l	360917	ENSRNOG00000002075	NA	NA	NA	predicted	0.855	elmmo
MIMAT0003199	rno-miR-381-3p	Wdr26	498301	ENSRNOG00000003723	NA	NA	NA	predicted	0.855	elmmo
MIMAT0003199	rno-miR-381-3p	Rpgrip1l	307724	ENSRNOG00000011829	NA	NA	NA	predicted	0.855	elmmo
MIMAT0003199	rno-miR-381-3p	Rnf111	300813	ENSRNOG00000060750	NA	NA	NA	predicted	0.855	elmmo
MIMAT0003199	rno-miR-381-3p	Hmg1l1		ENSRNOG00000029654	NA	NA	NA	predicted	0.855	elmmo
MIMAT0003199	rno-miR-381-3p	Mecom	294924	ENSRNOG00000012645	NA	NA	NA	predicted	0.855	elmmo
MIMAT0003199	rno-miR-381-3p	Elovl7	361895	ENSRNOG00000010450	NA	NA	NA	predicted	0.855	elmmo
MIMAT0003199	rno-miR-381-3p	Oxr1	117520	ENSRNOG00000056487	NA	NA	NA	predicted	0.855	elmmo
MIMAT0003199	rno-miR-381-3p	Sos2	85384	ENSRNOG00000004826	NA	NA	NA	predicted	0.855	elmmo
MIMAT0003199	rno-miR-381-3p	Crebbp	54244	ENSRNOG00000005330	NA	NA	NA	predicted	0.855	elmmo
MIMAT0003199	rno-miR-381-3p	Auts2	100362819	ENSRNOG00000000885	NA	NA	NA	predicted	0.855	elmmo
MIMAT0003199	rno-miR-381-3p	Nr3c1		ENSRNOG00000014096	NA	NA	NA	predicted	0.855	elmmo
MIMAT0003199	rno-miR-381-3p	Hnrpd	79256	ENSRNOG00000002292	NA	NA	NA	predicted	0.855	elmmo
MIMAT0003199	rno-miR-381-3p	Tob1	170842	ENSRNOG00000002828	NA	NA	NA	predicted	0.855	elmmo
MIMAT0003199	rno-miR-381-3p	LOC100362344	362428	ENSRNOG00000036910	NA	NA	NA	predicted	0.855	elmmo
MIMAT0003199	rno-miR-381-3p	Arhgap12	307016	ENSRNOG00000017791	NA	NA	NA	predicted	0.855	elmmo
MIMAT0003199	rno-miR-381-3p	Etf1	307503	ENSRNOG00000019450	NA	NA	NA	predicted	0.855	elmmo
MIMAT0003199	rno-miR-381-3p	Phf2	306814	ENSRNOG00000016816	NA	NA	NA	predicted	0.855	elmmo
MIMAT0003199	rno-miR-381-3p	Ubl3	363869	ENSRNOG00000000921	NA	NA	NA	predicted	0.855	elmmo
MIMAT0003199	rno-miR-381-3p	Frs2	314850	ENSRNOG00000005642	NA	NA	NA	predicted	0.855	elmmo
MIMAT0003199	rno-miR-381-3p	Ebf3	361668	ENSRNOG00000016102	NA	NA	NA	predicted	0.855	elmmo
MIMAT0003199	rno-miR-381-3p	Arid4b	84481	ENSRNOG00000016391	NA	NA	NA	predicted	0.855	elmmo
MIMAT0003199	rno-miR-381-3p	Msl2	315959	ENSRNOG00000023021	NA	NA	NA	predicted	0.855	elmmo
MIMAT0003199	rno-miR-381-3p			ENSRNOG00000038953	NA	NA	NA	predicted	0.855	elmmo
MIMAT0003199	rno-miR-381-3p	Papola	314417	ENSRNOG00000004827	NA	NA	NA	predicted	0.855	elmmo
MIMAT0003199	rno-miR-381-3p	Azin1	58961	ENSRNOG00000005333	NA	NA	NA	predicted	0.855	elmmo
MIMAT0003199	rno-miR-381-3p	Smek2	360993	ENSRNOG00000003712	NA	NA	NA	predicted	0.855	elmmo
MIMAT0003199	rno-miR-381-3p	Nfyb	25336	ENSRNOG00000010309	NA	NA	NA	predicted	0.855	elmmo
MIMAT0003199	rno-miR-381-3p	Klf7		ENSRNOG00000012961	NA	NA	NA	predicted	0.855	elmmo
MIMAT0003199	rno-miR-381-3p	LOC100912163	84481	ENSRNOG00000016391	NA	NA	NA	predicted	0.855	elmmo
MIMAT0003199	rno-miR-381-3p	Usp32	303394	ENSRNOG00000027711	NA	NA	NA	predicted	0.855	elmmo
MIMAT0003199	rno-miR-381-3p	Nfasc	116690	ENSRNOG00000030515	NA	NA	NA	predicted	0.855	elmmo
MIMAT0003199	rno-miR-381-3p	Meis2	311311	ENSRNOG00000004730	NA	NA	NA	predicted	0.855	elmmo
MIMAT0003199	rno-miR-381-3p	Actr3	362298	ENSRNOG00000003206	NA	NA	NA	predicted	0.855	elmmo
MIMAT0003199	rno-miR-381-3p	B3gnt2	305571	ENSRNOG00000009267	NA	NA	NA	predicted	0.855	elmmo
MIMAT0003199	rno-miR-381-3p	Lphn2	171447	ENSRNOG00000032660	NA	NA	NA	predicted	0.855	elmmo
MIMAT0003199	rno-miR-381-3p	Baz1b	368002	ENSRNOG00000001453	NA	NA	NA	predicted	0.855	elmmo
MIMAT0003199	rno-miR-381-3p	Jag1	29146	ENSRNOG00000007443	NA	NA	NA	predicted	0.855	elmmo
MIMAT0003199	rno-miR-381-3p	Rsf1	308839	ENSRNOG00000024194	NA	NA	NA	predicted	0.855	elmmo
MIMAT0003199	rno-miR-381-3p	Rab10	50993	ENSRNOG00000047088	NA	NA	NA	predicted	0.855	elmmo
MIMAT0003199	rno-miR-381-3p	Cry1	299691	ENSRNOG00000006622	NA	NA	NA	predicted	0.855	elmmo
MIMAT0003199	rno-miR-381-3p	Tle1	362533	ENSRNOG00000005882	NA	NA	NA	predicted	0.855	elmmo
MIMAT0003199	rno-miR-381-3p	Rap2c	302495	ENSRNOG00000002529	NA	NA	NA	predicted	0.855	elmmo
MIMAT0003199	rno-miR-381-3p	Chd4	117535	ENSRNOG00000018309	NA	NA	NA	predicted	0.855	elmmo
MIMAT0003199	rno-miR-381-3p	Zfp532	307362	ENSRNOG00000017116	NA	NA	NA	predicted	0.855	elmmo
MIMAT0003199	rno-miR-381-3p	Cul1	362356	ENSRNOG00000005310	NA	NA	NA	predicted	0.855	elmmo
MIMAT0003199	rno-miR-381-3p	Pafah1b1	83572	ENSRNOG00000002755	NA	NA	NA	predicted	0.855	elmmo
MIMAT0003199	rno-miR-381-3p	Vprbp	315987	ENSRNOG00000013841	NA	NA	NA	predicted	0.855	elmmo
MIMAT0003199	rno-miR-381-3p	Ier5	498256	ENSRNOG00000050671	NA	NA	NA	predicted	0.855	elmmo
MIMAT0003199	rno-miR-381-3p	Col4a3bp	365652	ENSRNOG00000015686	NA	NA	NA	predicted	0.855	elmmo
MIMAT0003199	rno-miR-381-3p	Birc6	313876	ENSRNOG00000027191	NA	NA	NA	predicted	0.855	elmmo
MIMAT0003199	rno-miR-381-3p	Ano1	309135	ENSRNOG00000020865	NA	NA	NA	predicted	0.855	elmmo
MIMAT0003199	rno-miR-381-3p	Bdnf	24225	ENSRNOG00000047466	NA	NA	NA	predicted	0.855	elmmo
MIMAT0003199	rno-miR-381-3p	Spry2	306141	ENSRNOG00000010058	NA	NA	NA	predicted	0.855	elmmo
MIMAT0003199	rno-miR-381-3p	Tnrc6a	308971	ENSRNOG00000024737	NA	NA	NA	predicted	0.855	elmmo
MIMAT0003199	rno-miR-381-3p	Emp2	360468	ENSRNOG00000002664	NA	NA	NA	predicted	0.855	elmmo
MIMAT0003199	rno-miR-381-3p	Sfrp2	310552	ENSRNOG00000009465	NA	NA	NA	predicted	0.855	elmmo
MIMAT0003199	rno-miR-381-3p	Klf4	114505	ENSRNOG00000016299	NA	NA	NA	predicted	0.855	elmmo
MIMAT0003199	rno-miR-381-3p	Ppp4r2	297486	ENSRNOG00000024647	NA	NA	NA	predicted	0.855	elmmo
MIMAT0003199	rno-miR-381-3p	Add3	25230	ENSRNOG00000012820	NA	NA	NA	predicted	0.855	elmmo
MIMAT0003199	rno-miR-381-3p	Tshz3	308523	ENSRNOG00000013938	NA	NA	NA	predicted	0.855	elmmo
MIMAT0003199	rno-miR-381-3p	Dcun1d3	309035	ENSRNOG00000014037	NA	NA	NA	predicted	0.855	elmmo
MIMAT0003199	rno-miR-381-3p	Pou3f3	192109	ENSRNOG00000038909	NA	NA	NA	predicted	0.855	elmmo
MIMAT0003199	rno-miR-381-3p	Sipa1l2	361442	ENSRNOG00000019791	NA	NA	NA	predicted	0.855	elmmo
MIMAT0003199	rno-miR-381-3p	Arih1	300756	ENSRNOG00000009887	NA	NA	NA	predicted	0.855	elmmo
MIMAT0003199	rno-miR-381-3p	Sema6d	311384	ENSRNOG00000004812	NA	NA	NA	predicted	0.855	elmmo
MIMAT0003199	rno-miR-381-3p	Dcun1d4	360928	ENSRNOG00000002152	NA	NA	NA	predicted	0.855	elmmo
MIMAT0003199	rno-miR-381-3p	Scamp1	29521	ENSRNOG00000010774	NA	NA	NA	predicted	0.855	elmmo
MIMAT0003199	rno-miR-381-3p	Zmynd11	291259	ENSRNOG00000014670	NA	NA	NA	predicted	0.855	elmmo
MIMAT0003199	rno-miR-381-3p	Mex3b	308790	ENSRNOG00000025142	NA	NA	NA	predicted	0.855	elmmo
MIMAT0003199	rno-miR-381-3p	Pan3	360760	ENSRNOG00000000942	NA	NA	NA	predicted	0.855	elmmo
MIMAT0003199	rno-miR-381-3p	Wwc1	303039	ENSRNOG00000008065	NA	NA	NA	predicted	0.855	elmmo
MIMAT0003199	rno-miR-381-3p	Gad1	24379	ENSRNOG00000000007	NA	NA	NA	predicted	0.855	elmmo
MIMAT0003199	rno-miR-381-3p	Pum1	362609	ENSRNOG00000011709	NA	NA	NA	predicted	0.855	elmmo
MIMAT0003199	rno-miR-381-3p	Spry1	294981	ENSRNOG00000025371	NA	NA	NA	predicted	0.855	elmmo
MIMAT0003199	rno-miR-381-3p	Hmgxb4	307667	ENSRNOG00000013878	NA	NA	NA	predicted	0.855	elmmo
MIMAT0003199	rno-miR-381-3p	Ube3a	361585	ENSRNOG00000015734	NA	NA	NA	predicted	0.855	elmmo
MIMAT0003199	rno-miR-381-3p	Gtdc1	362129	ENSRNOG00000031038	NA	NA	NA	predicted	0.855	elmmo
MIMAT0003199	rno-miR-381-3p	Zfp292	50552	ENSRNOG00000031031	NA	NA	NA	predicted	0.855	elmmo
MIMAT0003199	rno-miR-381-3p	Elf2	361944	ENSRNOG00000010815	NA	NA	NA	predicted	0.855	elmmo
MIMAT0003199	rno-miR-381-3p	Hivep2	29721	ENSRNOG00000011015	NA	NA	NA	predicted	0.855	elmmo
MIMAT0003199	rno-miR-381-3p	Rev3l	309812	ENSRNOG00000000593	NA	NA	NA	predicted	0.855	elmmo
MIMAT0003199	rno-miR-381-3p	Mark1	117016	ENSRNOG00000002339	NA	NA	NA	predicted	0.855	elmmo
MIMAT0003199	rno-miR-381-3p	Lsm14a	361554	ENSRNOG00000021133	NA	NA	NA	predicted	0.855	elmmo
MIMAT0003199	rno-miR-381-3p	Zfp652	497984	ENSRNOG00000017001	NA	NA	NA	predicted	0.855	elmmo
MIMAT0003199	rno-miR-381-3p	Mier1	313418	ENSRNOG00000007175	NA	NA	NA	predicted	0.845	elmmo
MIMAT0003199	rno-miR-381-3p	Filip1l	304020	ENSRNOG00000001645	NA	NA	NA	predicted	0.836	elmmo
MIMAT0003199	rno-miR-381-3p	Rras2	365355	ENSRNOG00000012258	NA	NA	NA	predicted	0.829	elmmo
MIMAT0003199	rno-miR-381-3p	Gm5471	691877	ENSRNOG00000033765	NA	NA	NA	predicted	0.825	elmmo
MIMAT0003199	rno-miR-381-3p	Med14	317343	ENSRNOG00000003792	NA	NA	NA	predicted	0.825	elmmo
MIMAT0003199	rno-miR-381-3p	LOC691877	691877	ENSRNOG00000033765	NA	NA	NA	predicted	0.825	elmmo
MIMAT0003199	rno-miR-381-3p	Cnot7	306492	ENSRNOG00000012263	NA	NA	NA	predicted	0.825	elmmo
MIMAT0003199	rno-miR-381-3p	Eif1	691877	ENSRNOG00000033765	NA	NA	NA	predicted	0.825	elmmo
MIMAT0003199	rno-miR-381-3p	Lcorl	498385	ENSRNOG00000003787	NA	NA	NA	predicted	0.825	elmmo
MIMAT0003199	rno-miR-381-3p	Ubn1	302935	ENSRNOG00000003019	NA	NA	NA	predicted	0.825	elmmo
MIMAT0003199	rno-miR-381-3p	Wee1	308937	ENSRNOG00000010017	NA	NA	NA	predicted	0.825	elmmo
MIMAT0003199	rno-miR-381-3p	Fam107b	498796	ENSRNOG00000014886	NA	NA	NA	predicted	0.822	elmmo
MIMAT0003199	rno-miR-381-3p	Cnksr3	308113	ENSRNOG00000018052	NA	NA	NA	predicted	0.821	elmmo
MIMAT0003199	rno-miR-381-3p	Fkbp1a	25639	ENSRNOG00000008822	NA	NA	NA	predicted	0.821	elmmo
MIMAT0003199	rno-miR-381-3p	Cpsf6	299811	ENSRNOG00000005927	NA	NA	NA	predicted	0.821	elmmo
MIMAT0003199	rno-miR-381-3p	Ptpn12	117255	ENSRNOG00000013135	NA	NA	NA	predicted	0.821	elmmo
MIMAT0003199	rno-miR-381-3p	Fam19a5	500915	ENSRNOG00000049349	NA	NA	NA	predicted	0.821	elmmo
MIMAT0003199	rno-miR-381-3p	Calm2		ENSRNOG00000030871	NA	NA	NA	predicted	0.819	elmmo
MIMAT0003199	rno-miR-381-3p	Tpm1	117557	ENSRNOG00000018184	NA	NA	NA	predicted	0.81	elmmo
MIMAT0003199	rno-miR-381-3p	Syt1	25716	ENSRNOG00000006426	NA	NA	NA	predicted	0.81	elmmo
MIMAT0003199	rno-miR-381-3p	Slc23a2	50622	ENSRNOG00000021262	NA	NA	NA	predicted	0.81	elmmo
MIMAT0003199	rno-miR-381-3p	Vstm2b	361560	ENSRNOG00000017456	NA	NA	NA	predicted	0.81	elmmo
MIMAT0003199	rno-miR-381-3p	Cdk17	314743	ENSRNOG00000004148	NA	NA	NA	predicted	0.81	elmmo
MIMAT0003199	rno-miR-381-3p	Gulp1	314543	ENSRNOG00000003242	NA	NA	NA	predicted	0.81	elmmo
MIMAT0003199	rno-miR-381-3p	Elavl2		ENSRNOG00000006853	NA	NA	NA	predicted	0.81	elmmo
MIMAT0003199	rno-miR-381-3p	Selk	290549	ENSRNOG00000014624	NA	NA	NA	predicted	0.81	elmmo
MIMAT0003199	rno-miR-381-3p	Kat6a	306571	ENSRNOG00000025174	NA	NA	NA	predicted	0.81	elmmo
MIMAT0003199	rno-miR-381-3p	Pum2	298874	ENSRNOG00000006180	NA	NA	NA	predicted	0.808	elmmo
MIMAT0003199	rno-miR-381-3p	Tbc1d15	366896	ENSRNOG00000003889	NA	NA	NA	predicted	0.808	elmmo
MIMAT0003199	rno-miR-381-3p	Fgf13	84488	ENSRNOG00000042753	NA	NA	NA	predicted	0.803	elmmo
MIMAT0003199	rno-miR-381-3p	Wnk1	116477	ENSRNOG00000009956	NA	NA	NA	predicted	0.803	elmmo
MIMAT0003199	rno-miR-381-3p	Lmo4	362051	ENSRNOG00000009205	NA	NA	NA	predicted	0.803	elmmo
MIMAT0003199	rno-miR-381-3p	Zfp644	305127	ENSRNOG00000002112	NA	NA	NA	predicted	0.803	elmmo
MIMAT0003199	rno-miR-381-3p	Plcb4	25031	ENSRNOG00000033119	NA	NA	NA	predicted	0.803	elmmo
MIMAT0003199	rno-miR-381-3p	Stag1	315958	ENSRNOG00000015389	NA	NA	NA	predicted	0.803	elmmo
MIMAT0003199	rno-miR-381-3p	Lurap1l	362535	ENSRNOG00000033740	NA	NA	NA	predicted	0.803	elmmo
MIMAT0003199	rno-miR-381-3p	Mycn	298894	ENSRNOG00000051372	NA	NA	NA	predicted	0.803	elmmo
MIMAT0003199	rno-miR-381-3p	Efnb1	25186	ENSRNOG00000006877	NA	NA	NA	predicted	0.803	elmmo
MIMAT0003199	rno-miR-381-3p	Ythdf1	296467	ENSRNOG00000027015	NA	NA	NA	predicted	0.803	elmmo
MIMAT0003199	rno-miR-381-3p	Npy	100912228	ENSRNOG00000009768	NA	NA	NA	predicted	0.803	elmmo
MIMAT0003199	rno-miR-381-3p	Srsf11	502603	ENSRNOG00000029592	NA	NA	NA	predicted	0.803	elmmo
MIMAT0003199	rno-miR-381-3p	Lrp6	312781	ENSRNOG00000006338	NA	NA	NA	predicted	0.803	elmmo
MIMAT0003199	rno-miR-381-3p	Eif3a	292148	ENSRNOG00000010117	NA	NA	NA	predicted	0.799	elmmo
MIMAT0003199	rno-miR-381-3p	Rab6b	363123	ENSRNOG00000009198	NA	NA	NA	predicted	0.799	elmmo
MIMAT0003199	rno-miR-381-3p	Hic1		ENSRNOG00000046405	NA	NA	NA	predicted	0.799	elmmo
MIMAT0003199	rno-miR-381-3p	Id1	25261	ENSRNOG00000021750	NA	NA	NA	predicted	0.799	elmmo
MIMAT0003199	rno-miR-381-3p	Brf2	306542	ENSRNOG00000012739	NA	NA	NA	predicted	0.799	elmmo
MIMAT0003199	rno-miR-381-3p	Elovl2	498728	ENSRNOG00000014702	NA	NA	NA	predicted	0.799	elmmo
MIMAT0003199	rno-miR-381-3p	Nudt4	94267	ENSRNOG00000009094	NA	NA	NA	predicted	0.799	elmmo
MIMAT0003199	rno-miR-381-3p	Btf3l4	365426	ENSRNOG00000008512	NA	NA	NA	predicted	0.799	elmmo
MIMAT0003199	rno-miR-381-3p	Jup	81679	ENSRNOG00000015380	NA	NA	NA	predicted	0.799	elmmo
MIMAT0003199	rno-miR-381-3p	Ppp6c	171121	ENSRNOG00000015145	NA	NA	NA	predicted	0.799	elmmo
MIMAT0003199	rno-miR-381-3p	Nasp	298441	ENSRNOG00000016454	NA	NA	NA	predicted	0.799	elmmo
MIMAT0003199	rno-miR-381-3p	Zmym4	313598	ENSRNOG00000012397	NA	NA	NA	predicted	0.799	elmmo
MIMAT0003199	rno-miR-381-3p	Rfx1	288906	ENSRNOG00000006049	NA	NA	NA	predicted	0.799	elmmo
MIMAT0003199	rno-miR-381-3p	Rab11b	79434	ENSRNOG00000007648	NA	NA	NA	predicted	0.799	elmmo
MIMAT0003199	rno-miR-381-3p	Akap9	246150	ENSRNOG00000026319	NA	NA	NA	predicted	0.799	elmmo
MIMAT0003199	rno-miR-381-3p	Mllt10	361285	ENSRNOG00000022249	NA	NA	NA	predicted	0.799	elmmo
MIMAT0003199	rno-miR-381-3p	Bhlhe22	365748	ENSRNOG00000021745	NA	NA	NA	predicted	0.799	elmmo
MIMAT0003199	rno-miR-381-3p	Khdrbs1	117268	ENSRNOG00000046794	NA	NA	NA	predicted	0.799	elmmo
MIMAT0003199	rno-miR-381-3p	LOC100910831	361712	ENSRNOG00000020950	NA	NA	NA	predicted	0.799	elmmo
MIMAT0003199	rno-miR-381-3p	Slc18a2	25549	ENSRNOG00000008890	NA	NA	NA	predicted	0.799	elmmo
MIMAT0003199	rno-miR-381-3p	Golga2	64528	ENSRNOG00000011884	NA	NA	NA	predicted	0.799	elmmo
MIMAT0003199	rno-miR-381-3p	Foxj3	313554	ENSRNOG00000061851	NA	NA	NA	predicted	0.799	elmmo
MIMAT0003199	rno-miR-381-3p	Ptms	83801	ENSRNOG00000060098	NA	NA	NA	predicted	0.799	elmmo
MIMAT0003199	rno-miR-381-3p	Mospd2	363463	ENSRNOG00000003350	NA	NA	NA	predicted	0.799	elmmo
MIMAT0003199	rno-miR-381-3p	Ube4a	315608	ENSRNOG00000026833	NA	NA	NA	predicted	0.799	elmmo
MIMAT0003199	rno-miR-381-3p	Tsc22d2	499624	ENSRNOG00000038044	NA	NA	NA	predicted	0.799	elmmo
MIMAT0003199	rno-miR-381-3p	Akap12	83425	ENSRNOG00000019549	NA	NA	NA	predicted	0.799	elmmo
MIMAT0003199	rno-miR-381-3p	Prkrir	308845	ENSRNOG00000015808	NA	NA	NA	predicted	0.799	elmmo
MIMAT0003199	rno-miR-381-3p	Hmbox1	305968	ENSRNOG00000013326	NA	NA	NA	predicted	0.799	elmmo
MIMAT0003199	rno-miR-381-3p	Rab33a	317580	ENSRNOG00000006698	NA	NA	NA	predicted	0.799	elmmo
MIMAT0003199	rno-miR-381-3p	Zbtb39	299510	ENSRNOG00000004306	NA	NA	NA	predicted	0.799	elmmo
MIMAT0003199	rno-miR-381-3p	Eif4a1	287436	ENSRNOG00000030628	NA	NA	NA	predicted	0.799	elmmo
MIMAT0003199	rno-miR-381-3p	Tgfb3	25717	ENSRNOG00000009867	NA	NA	NA	predicted	0.799	elmmo
MIMAT0003199	rno-miR-381-3p	Hip1	192154	ENSRNOG00000001448	NA	NA	NA	predicted	0.799	elmmo
MIMAT0003199	rno-miR-381-3p	Rprd1b	311591	ENSRNOG00000012923	NA	NA	NA	predicted	0.799	elmmo
MIMAT0003199	rno-miR-381-3p	Slc24a3	85267	ENSRNOG00000009480	NA	NA	NA	predicted	0.799	elmmo
MIMAT0003199	rno-miR-381-3p	Stk40	360230	ENSRNOG00000025679	NA	NA	NA	predicted	0.799	elmmo
MIMAT0003199	rno-miR-381-3p	Rlf	313566	ENSRNOG00000027921	NA	NA	NA	predicted	0.799	elmmo
MIMAT0003199	rno-miR-381-3p	Tmem39a	288092	ENSRNOG00000003075	NA	NA	NA	predicted	0.799	elmmo
MIMAT0003199	rno-miR-381-3p	Syvn1	361712	ENSRNOG00000020950	NA	NA	NA	predicted	0.799	elmmo
MIMAT0003199	rno-miR-381-3p	Slc44a1	85254	ENSRNOG00000055089	NA	NA	NA	predicted	0.799	elmmo
MIMAT0003199	rno-miR-381-3p	Ing3	312154	ENSRNOG00000005496	NA	NA	NA	predicted	0.799	elmmo
MIMAT0003199	rno-miR-381-3p	Siah1	140941	ENSRNOG00000015143	NA	NA	NA	predicted	0.799	elmmo
MIMAT0003199	rno-miR-381-3p	Ccar2	306007	ENSRNOG00000018295	NA	NA	NA	predicted	0.799	elmmo
MIMAT0003199	rno-miR-381-3p	Eif4a2	303831	ENSRNOG00000001815	NA	NA	NA	predicted	0.799	elmmo
MIMAT0003199	rno-miR-381-3p	Hiatl1	306687	ENSRNOG00000018227	NA	NA	NA	predicted	0.799	elmmo
MIMAT0003199	rno-miR-381-3p	Rbpj	679028	ENSRNOG00000046327	NA	NA	NA	predicted	0.799	elmmo
MIMAT0003199	rno-miR-381-3p	Eps8	312812	ENSRNOG00000007047	NA	NA	NA	predicted	0.799	elmmo
MIMAT0003199	rno-miR-381-3p	Srsf2	494445	ENSRNOG00000000248	NA	NA	NA	predicted	0.799	elmmo
MIMAT0003199	rno-miR-381-3p	Zcchc11	313481	ENSRNOG00000052062	NA	NA	NA	predicted	0.799	elmmo
MIMAT0003199	rno-miR-381-3p	Srsf1	689890	ENSRNOG00000050323	NA	NA	NA	predicted	0.799	elmmo
MIMAT0003199	rno-miR-381-3p	Nfat5	307820	ENSRNOG00000011879	NA	NA	NA	predicted	0.799	elmmo
MIMAT0003199	rno-miR-381-3p	Eps15l1	361120	ENSRNOG00000013502	NA	NA	NA	predicted	0.799	elmmo
MIMAT0003199	rno-miR-381-3p	Rnf13	681578	ENSRNOG00000029209	NA	NA	NA	predicted	0.799	elmmo
MIMAT0003199	rno-miR-381-3p	Acsl3	114024	ENSRNOG00000014718	NA	NA	NA	predicted	0.799	elmmo
MIMAT0003199	rno-miR-381-3p	Rbm24	690139	ENSRNOG00000046547	NA	NA	NA	predicted	0.799	elmmo
MIMAT0003199	rno-miR-381-3p	Fam117a	497983	ENSRNOG00000004417	NA	NA	NA	predicted	0.799	elmmo
MIMAT0003199	rno-miR-381-3p	Fam134c	360632	ENSRNOG00000020056	NA	NA	NA	predicted	0.799	elmmo
MIMAT0003199	rno-miR-381-3p	Rbbp7	83712	ENSRNOG00000005157	NA	NA	NA	predicted	0.799	elmmo
MIMAT0003199	rno-miR-381-3p	Fam76b	367021	ENSRNOG00000024863	NA	NA	NA	predicted	0.799	elmmo
MIMAT0003199	rno-miR-381-3p	Pnisr	297942	ENSRNOG00000008782	NA	NA	NA	predicted	0.799	elmmo
MIMAT0003199	rno-miR-381-3p	Dek	306817	ENSRNOG00000016152	NA	NA	NA	predicted	0.799	elmmo
MIMAT0003199	rno-miR-381-3p	Ets1	24356	ENSRNOG00000008941	NA	NA	NA	predicted	0.799	elmmo
MIMAT0003199	rno-miR-381-3p	Larp4b	307070	ENSRNOG00000015888	NA	NA	NA	predicted	0.799	elmmo
MIMAT0003199	rno-miR-381-3p	Gls	24398	ENSRNOG00000056246	NA	NA	NA	predicted	0.799	elmmo
MIMAT0003199	rno-miR-381-3p	Rabgap1	311911	ENSRNOG00000009402	NA	NA	NA	predicted	0.795	elmmo
MIMAT0003199	rno-miR-381-3p	Tmem260	361030	ENSRNOG00000013353	NA	NA	NA	predicted	0.795	elmmo
MIMAT0003199	rno-miR-381-3p	Usp15	171329	ENSRNOG00000023202	NA	NA	NA	predicted	0.795	elmmo
MIMAT0003199	rno-miR-381-3p	Agap1	316611	ENSRNOG00000019476	NA	NA	NA	predicted	0.795	elmmo
MIMAT0003199	rno-miR-381-3p	Rasgef1a	312664	ENSRNOG00000031671	NA	NA	NA	predicted	0.771	elmmo
MIMAT0003199	rno-miR-381-3p	Herc2	308669	ENSRNOG00000013718	NA	NA	NA	predicted	0.765	elmmo
MIMAT0003199	rno-miR-381-3p	Smarcb1	361825	ENSRNOG00000028302	NA	NA	NA	predicted	0.757	elmmo
MIMAT0003199	rno-miR-381-3p	Zfp608	307296	ENSRNOG00000023197	NA	NA	NA	predicted	0.757	elmmo
MIMAT0003199	rno-miR-381-3p	Potef		ENSRNOG00000036701	NA	NA	NA	predicted	0.757	elmmo
MIMAT0003199	rno-miR-381-3p	Actg1		ENSRNOG00000036701	NA	NA	NA	predicted	0.757	elmmo
MIMAT0003199	rno-miR-381-3p	LOC100361457		ENSRNOG00000036701	NA	NA	NA	predicted	0.757	elmmo
MIMAT0003199	rno-miR-381-3p	RGD1559904	313061	ENSRNOG00000014664	NA	NA	NA	predicted	0.757	elmmo
MIMAT0003199	rno-miR-381-3p	Snrnp40	313056	ENSRNOG00000012219	NA	NA	NA	predicted	0.756	elmmo
MIMAT0003199	rno-miR-381-3p	Lrrc4	641521	ENSRNOG00000008098	NA	NA	NA	predicted	0.756	elmmo
MIMAT0003199	rno-miR-381-3p	Arx	317268	ENSRNOG00000032074	NA	NA	NA	predicted	0.756	elmmo
MIMAT0003199	rno-miR-381-3p	Setd5	297514	ENSRNOG00000007472	NA	NA	NA	predicted	0.756	elmmo
MIMAT0003199	rno-miR-381-3p	Tmem259	299608	ENSRNOG00000012808	NA	NA	NA	predicted	0.756	elmmo
MIMAT0003199	rno-miR-381-3p	Khdrbs2	170843	ENSRNOG00000012284	NA	NA	NA	predicted	0.754	elmmo
MIMAT0003199	rno-miR-381-3p	Rhoq	85428	ENSRNOG00000015415	NA	NA	NA	predicted	0.751	elmmo
MIMAT0003199	rno-miR-381-3p	Nlk	497961	ENSRNOG00000008704	NA	NA	NA	predicted	0.751	elmmo
MIMAT0003199	rno-miR-381-3p	Gfpt2	360518	ENSRNOG00000002810	NA	NA	NA	predicted	0.75	elmmo
MIMAT0003199	rno-miR-381-3p	Nol4	307553	ENSRNOG00000014775	NA	NA	NA	predicted	0.748	elmmo
MIMAT0003199	rno-miR-381-3p	Chic2	83835	ENSRNOG00000002267	NA	NA	NA	predicted	0.748	elmmo
MIMAT0003199	rno-miR-381-3p	Lamc1	117036	ENSRNOG00000002680	NA	NA	NA	predicted	0.739	elmmo
MIMAT0003199	rno-miR-381-3p	Gas2	499156	ENSRNOG00000016717	NA	NA	NA	predicted	0.737	elmmo
MIMAT0003199	rno-miR-381-3p	Mphosph9	288654	ENSRNOG00000001074	NA	NA	NA	predicted	0.737	elmmo
MIMAT0003199	rno-miR-381-3p	Klf3	114845	ENSRNOG00000002163	NA	NA	NA	predicted	0.737	elmmo
MIMAT0003199	rno-miR-381-3p	Gtf2i	353256	ENSRNOG00000001479	NA	NA	NA	predicted	0.737	elmmo
MIMAT0003199	rno-miR-381-3p	Mitf	25094	ENSRNOG00000008658	NA	NA	NA	predicted	0.737	elmmo
MIMAT0003199	rno-miR-381-3p	R3hdm2	362894	ENSRNOG00000007801	NA	NA	NA	predicted	0.737	elmmo
MIMAT0003199	rno-miR-381-3p	Pard6b	362279	ENSRNOG00000010883	NA	NA	NA	predicted	0.737	elmmo
MIMAT0003199	rno-miR-381-3p	Psip1	313323	ENSRNOG00000011498	NA	NA	NA	predicted	0.737	elmmo
MIMAT0003199	rno-miR-381-3p	Nfkbia	25493	ENSRNOG00000007390	NA	NA	NA	predicted	0.737	elmmo
MIMAT0003199	rno-miR-381-3p	Grm1	24414	ENSRNOG00000014290	NA	NA	NA	predicted	0.737	elmmo
MIMAT0003199	rno-miR-381-3p	Slc6a8	50690	ENSRNOG00000057620	NA	NA	NA	predicted	0.737	elmmo
MIMAT0003199	rno-miR-381-3p	Rnf2	304850	ENSRNOG00000002454	NA	NA	NA	predicted	0.737	elmmo
MIMAT0003199	rno-miR-381-3p	Epb41l1	100911769	ENSRNOG00000020007	NA	NA	NA	predicted	0.737	elmmo
MIMAT0003199	rno-miR-381-3p	Lzts2	365468	ENSRNOG00000014969	NA	NA	NA	predicted	0.737	elmmo
MIMAT0003199	rno-miR-381-3p	Prrc2a	294250	ENSRNOG00000000852	NA	NA	NA	predicted	0.737	elmmo
MIMAT0003199	rno-miR-381-3p	Gfra1	25454	ENSRNOG00000017438	NA	NA	NA	predicted	0.737	elmmo
MIMAT0003199	rno-miR-381-3p	Atrn	83526	ENSRNOG00000021240	NA	NA	NA	predicted	0.737	elmmo
MIMAT0003199	rno-miR-381-3p	Kctd15	499129	ENSRNOG00000021137	NA	NA	NA	predicted	0.737	elmmo
MIMAT0003199	rno-miR-381-3p	Ano4	299714	ENSRNOG00000006841	NA	NA	NA	predicted	0.737	elmmo
MIMAT0003199	rno-miR-381-3p	Mtss1	362918	ENSRNOG00000009001	NA	NA	NA	predicted	0.737	elmmo
MIMAT0003199	rno-miR-381-3p	Zfp280d	315798	ENSRNOG00000055631	NA	NA	NA	predicted	0.732	elmmo
MIMAT0003199	rno-miR-381-3p	Slitrk6	290467	ENSRNOG00000022337	NA	NA	NA	predicted	0.732	elmmo
MIMAT0003199	rno-miR-381-3p	Aff4	303132	ENSRNOG00000006965	NA	NA	NA	predicted	0.732	elmmo
MIMAT0003199	rno-miR-381-3p	Irx3	307721	ENSRNOG00000011533	NA	NA	NA	predicted	0.732	elmmo
MIMAT0003199	rno-miR-381-3p	Senp7	288167	ENSRNOG00000001616	NA	NA	NA	predicted	0.732	elmmo
MIMAT0003199	rno-miR-381-3p	Fam188a	291320	ENSRNOG00000016955	NA	NA	NA	predicted	0.732	elmmo
MIMAT0003199	rno-miR-381-3p	Usp25	304150	ENSRNOG00000001573	NA	NA	NA	predicted	0.731	elmmo
MIMAT0003199	rno-miR-381-3p	Twist1	85489	ENSRNOG00000011101	NA	NA	NA	predicted	0.731	elmmo
MIMAT0003199	rno-miR-381-3p	Prpf38b	499691	ENSRNOG00000020438	NA	NA	NA	predicted	0.731	elmmo
MIMAT0003199	rno-miR-381-3p	Klf5	84410	ENSRNOG00000008785	NA	NA	NA	predicted	0.728	elmmo
MIMAT0003199	rno-miR-381-3p	Spock3	306404	ENSRNOG00000029903	NA	NA	NA	predicted	0.723	elmmo
MIMAT0003199	rno-miR-381-3p	Fbxo34	305830	ENSRNOG00000011704	NA	NA	NA	predicted	0.723	elmmo
MIMAT0003199	rno-miR-381-3p	Chtop	361990	ENSRNOG00000012760	NA	NA	NA	predicted	0.723	elmmo
MIMAT0003199	rno-miR-381-3p	Usp46	289584	ENSRNOG00000002106	NA	NA	NA	predicted	0.723	elmmo
MIMAT0003199	rno-miR-381-3p	Pmp22	24660	ENSRNOG00000003338	NA	NA	NA	predicted	0.723	elmmo
MIMAT0003199	rno-miR-381-3p	LOC100910212	100910212	ENSRNOG00000017174	NA	NA	NA	predicted	0.723	elmmo
MIMAT0003199	rno-miR-381-3p	Vapa	58857	ENSRNOG00000014765	NA	NA	NA	predicted	0.723	elmmo
MIMAT0003199	rno-miR-381-3p	LOC361990	361990	ENSRNOG00000012760	NA	NA	NA	predicted	0.723	elmmo
MIMAT0003199	rno-miR-381-3p	Igf2r	25151	ENSRNOG00000014997	NA	NA	NA	predicted	0.723	elmmo
MIMAT0003199	rno-miR-381-3p	Amotl2	65157	ENSRNOG00000008487	NA	NA	NA	predicted	0.723	elmmo
MIMAT0003199	rno-miR-381-3p	Mmp16	65205	ENSRNOG00000005708	NA	NA	NA	predicted	0.723	elmmo
MIMAT0003199	rno-miR-381-3p	Fndc3a	306022	ENSRNOG00000014478	NA	NA	NA	predicted	0.723	elmmo
MIMAT0003199	rno-miR-381-3p	Qk	100910212	ENSRNOG00000017174	NA	NA	NA	predicted	0.723	elmmo
MIMAT0003199	rno-miR-381-3p	Hmgcr	25675	ENSRNOG00000016122	NA	NA	NA	predicted	0.723	elmmo
MIMAT0003199	rno-miR-381-3p	Itm2c	301575	ENSRNOG00000017359	NA	NA	NA	predicted	0.705	elmmo
MIMAT0003199	rno-miR-381-3p	Tectb	292124	ENSRNOG00000015671	NA	NA	NA	predicted	0.703	elmmo
MIMAT0003199	rno-miR-381-3p	RGD1311703	293160	ENSRNOG00000053659	NA	NA	NA	predicted	0.703	elmmo
MIMAT0003199	rno-miR-381-3p	Hmgb2	29395	ENSRNOG00000013167	NA	NA	NA	predicted	0.703	elmmo
MIMAT0003199	rno-miR-381-3p	Smarcad1	312398	ENSRNOG00000006391	NA	NA	NA	predicted	0.703	elmmo
MIMAT0003199	rno-miR-381-3p	Gorasp2	113961	ENSRNOG00000023386	NA	NA	NA	predicted	0.703	elmmo
MIMAT0003199	rno-miR-381-3p	Med12	679693	ENSRNOG00000003848	NA	NA	NA	predicted	0.703	elmmo
MIMAT0003199	rno-miR-381-3p	Zfand3	361816	ENSRNOG00000059659	NA	NA	NA	predicted	0.703	elmmo
MIMAT0003199	rno-miR-381-3p	Cyfip1	308666	ENSRNOG00000011945	NA	NA	NA	predicted	0.703	elmmo
MIMAT0003199	rno-miR-381-3p	Gdap2	362004	ENSRNOG00000019754	NA	NA	NA	predicted	0.703	elmmo
MIMAT0003199	rno-miR-381-3p	Zmiz1	361103	ENSRNOG00000010488	NA	NA	NA	predicted	0.703	elmmo
MIMAT0003199	rno-miR-381-3p	LOC100911550	100911550	ENSRNOG00000006612	NA	NA	NA	predicted	0.703	elmmo
MIMAT0003199	rno-miR-381-3p	Lrrc16a	306941	ENSRNOG00000016576	NA	NA	NA	predicted	0.703	elmmo
MIMAT0003199	rno-miR-381-3p	Slc38a1	170567	ENSRNOG00000005291	NA	NA	NA	predicted	0.703	elmmo
MIMAT0003199	rno-miR-381-3p	Epha4	316539	ENSRNOG00000013213	NA	NA	NA	predicted	0.703	elmmo
MIMAT0003199	rno-miR-381-3p	Fcho2	309129	ENSRNOG00000015334	NA	NA	NA	predicted	0.703	elmmo
MIMAT0003199	rno-miR-381-3p	Ralgds	29622	ENSRNOG00000010219	NA	NA	NA	predicted	0.703	elmmo
MIMAT0003199	rno-miR-381-3p	Zfp518a	309478	ENSRNOG00000036592	NA	NA	NA	predicted	0.703	elmmo
MIMAT0003199	rno-miR-381-3p	Dkk3	171548	ENSRNOG00000016343	NA	NA	NA	predicted	0.703	elmmo
MIMAT0003199	rno-miR-381-3p	Slc30a4	64469	ENSRNOG00000000170	NA	NA	NA	predicted	0.703	elmmo
MIMAT0003199	rno-miR-381-3p	Btaf1	368042	ENSRNOG00000017938	NA	NA	NA	predicted	0.703	elmmo
MIMAT0003199	rno-miR-381-3p	Papolg	305586	ENSRNOG00000006261	NA	NA	NA	predicted	0.703	elmmo
MIMAT0003199	rno-miR-381-3p	Hat1	296501	ENSRNOG00000001524	NA	NA	NA	predicted	0.703	elmmo
MIMAT0003199	rno-miR-381-3p	March6	294862	ENSRNOG00000011066	NA	NA	NA	predicted	0.703	elmmo
MIMAT0003199	rno-miR-381-3p	Cxcr4	60628	ENSRNOG00000003866	NA	NA	NA	predicted	0.703	elmmo
MIMAT0003199	rno-miR-381-3p	Pnn	368070	ENSRNOG00000004061	NA	NA	NA	predicted	0.703	elmmo
MIMAT0003199	rno-miR-381-3p	Appbp2	303396	ENSRNOG00000027654	NA	NA	NA	predicted	0.703	elmmo
MIMAT0003199	rno-miR-381-3p	Vsnl1	24877	ENSRNOG00000005345	NA	NA	NA	predicted	0.703	elmmo
MIMAT0003199	rno-miR-381-3p	Zfp592	293038	ENSRNOG00000060206	NA	NA	NA	predicted	0.703	elmmo
MIMAT0003199	rno-miR-381-3p	Ankrd12	100910483	ENSRNOG00000012733	NA	NA	NA	predicted	0.703	elmmo
MIMAT0003199	rno-miR-381-3p	Scx	680712	ENSRNOG00000021812	NA	NA	NA	predicted	0.703	elmmo
MIMAT0003199	rno-miR-381-3p	Zbtb1	314246	ENSRNOG00000030397	NA	NA	NA	predicted	0.703	elmmo
MIMAT0003199	rno-miR-381-3p	Casp8ap2	313128	ENSRNOG00000006487	NA	NA	NA	predicted	0.703	elmmo
MIMAT0003199	rno-miR-381-3p	Slc25a16	361836	ENSRNOG00000000387	NA	NA	NA	predicted	0.703	elmmo
MIMAT0003199	rno-miR-381-3p	Stx12	65033	ENSRNOG00000011804	NA	NA	NA	predicted	0.703	elmmo
MIMAT0003199	rno-miR-381-3p	Nkx6-1	65193	ENSRNOG00000002149	NA	NA	NA	predicted	0.703	elmmo
MIMAT0003199	rno-miR-381-3p	Tsc22d1	498545	ENSRNOG00000001030	NA	NA	NA	predicted	0.703	elmmo
MIMAT0003199	rno-miR-381-3p	Crispld1	316482	ENSRNOG00000017773	NA	NA	NA	predicted	0.703	elmmo
MIMAT0003199	rno-miR-381-3p	Dock11	313438	ENSRNOG00000013321	NA	NA	NA	predicted	0.703	elmmo
MIMAT0003199	rno-miR-381-3p	Nolc1	64896	ENSRNOG00000018704	NA	NA	NA	predicted	0.703	elmmo
MIMAT0003199	rno-miR-381-3p	Grhl3	298555	ENSRNOG00000029427	NA	NA	NA	predicted	0.703	elmmo
MIMAT0003199	rno-miR-381-3p	Slc38a2	29642	ENSRNOG00000006305	NA	NA	NA	predicted	0.703	elmmo
MIMAT0003199	rno-miR-381-3p	F3	25584	ENSRNOG00000011800	NA	NA	NA	predicted	0.703	elmmo
MIMAT0003199	rno-miR-381-3p	Mybl1	297783	ENSRNOG00000021669	NA	NA	NA	predicted	0.703	elmmo
MIMAT0003199	rno-miR-381-3p	Fam208a	680155	ENSRNOG00000014750	NA	NA	NA	predicted	0.703	elmmo
MIMAT0003199	rno-miR-381-3p	Kbtbd2	312372	ENSRNOG00000013809	NA	NA	NA	predicted	0.703	elmmo
MIMAT0003199	rno-miR-381-3p	Fyttd1	360726	ENSRNOG00000034233	NA	NA	NA	predicted	0.703	elmmo
MIMAT0003199	rno-miR-381-3p	Clasp2	114514	ENSRNOG00000009161	NA	NA	NA	predicted	0.703	elmmo
MIMAT0003199	rno-miR-381-3p	Plcl2	301173	ENSRNOG00000013368	NA	NA	NA	predicted	0.703	elmmo
MIMAT0003199	rno-miR-381-3p	Sema3c	296787	ENSRNOG00000006526	NA	NA	NA	predicted	0.703	elmmo
MIMAT0003199	rno-miR-381-3p	Arid4a	314205	ENSRNOG00000026239	NA	NA	NA	predicted	0.703	elmmo
MIMAT0003199	rno-miR-381-3p	Ppp1r2	192361	ENSRNOG00000001733	NA	NA	NA	predicted	0.703	elmmo
MIMAT0003199	rno-miR-381-3p	Dnajb5	313811	ENSRNOG00000000130	NA	NA	NA	predicted	0.703	elmmo
MIMAT0003199	rno-miR-381-3p	Dock1	309081	ENSRNOG00000018683	NA	NA	NA	predicted	0.703	elmmo
MIMAT0003199	rno-miR-381-3p	Syngr3	302975	ENSRNOG00000012620	NA	NA	NA	predicted	0.703	elmmo
MIMAT0003199	rno-miR-381-3p	Dagla	309207	ENSRNOG00000027264	NA	NA	NA	predicted	0.703	elmmo
MIMAT0003199	rno-miR-381-3p	Smarca5	307766	ENSRNOG00000018149	NA	NA	NA	predicted	0.703	elmmo
MIMAT0003199	rno-miR-381-3p	Med6	299180	ENSRNOG00000006976	NA	NA	NA	predicted	0.703	elmmo
MIMAT0003199	rno-miR-381-3p	Arpp21	363153	ENSRNOG00000008919	NA	NA	NA	predicted	0.703	elmmo
MIMAT0003199	rno-miR-381-3p	Olfml2b	304960	ENSRNOG00000003018	NA	NA	NA	predicted	0.703	elmmo
MIMAT0003199	rno-miR-381-3p	Ndel1	170845	ENSRNOG00000004139	NA	NA	NA	predicted	0.703	elmmo
MIMAT0003199	rno-miR-381-3p	Klhdc2	679960	ENSRNOG00000004474	NA	NA	NA	predicted	0.703	elmmo
MIMAT0003199	rno-miR-381-3p	Ahdc1	362617	ENSRNOG00000042855	NA	NA	NA	predicted	0.703	elmmo
MIMAT0003199	rno-miR-381-3p	Sgtb	294708	ENSRNOG00000011937	NA	NA	NA	predicted	0.703	elmmo
MIMAT0003199	rno-miR-381-3p	Ythdf3	361920	ENSRNOG00000010084	NA	NA	NA	predicted	0.703	elmmo
MIMAT0003199	rno-miR-381-3p	Snai1	116490	ENSRNOG00000009594	NA	NA	NA	predicted	0.703	elmmo
MIMAT0003199	rno-miR-381-3p	Cul3	301555	ENSRNOG00000015633	NA	NA	NA	predicted	0.703	elmmo
MIMAT0003199	rno-miR-381-3p	Paxbp1	681004	ENSRNOG00000002036	NA	NA	NA	predicted	0.703	elmmo
MIMAT0003199	rno-miR-381-3p	Zfyve20	312562	ENSRNOG00000011391	NA	NA	NA	predicted	0.703	elmmo
MIMAT0003199	rno-miR-381-3p	Ptpre	114767	ENSRNOG00000015717	NA	NA	NA	predicted	0.703	elmmo
MIMAT0003199	rno-miR-381-3p	Erf	292721	ENSRNOG00000020426	NA	NA	NA	predicted	0.703	elmmo
MIMAT0003199	rno-miR-381-3p	Rnf34	282845	ENSRNOG00000001331	NA	NA	NA	predicted	0.703	elmmo
MIMAT0003199	rno-miR-381-3p	Ccna2	114494	ENSRNOG00000015423	NA	NA	NA	predicted	0.703	elmmo
MIMAT0003199	rno-miR-381-3p	Arhgef3	290541	ENSRNOG00000014363	NA	NA	NA	predicted	0.703	elmmo
MIMAT0003199	rno-miR-381-3p	RGD1308106	361719	ENSRNOG00000025061	NA	NA	NA	predicted	0.703	elmmo
MIMAT0003199	rno-miR-381-3p	Rhot1	303351	ENSRNOG00000004093	NA	NA	NA	predicted	0.703	elmmo
MIMAT0003199	rno-miR-381-3p	Capza2	493810	ENSRNOG00000056207	NA	NA	NA	predicted	0.703	elmmo
MIMAT0003199	rno-miR-381-3p	Insig1	64194	ENSRNOG00000006859	NA	NA	NA	predicted	0.703	elmmo
MIMAT0003199	rno-miR-381-3p	Slc34a2	84395	ENSRNOG00000004626	NA	NA	NA	predicted	0.703	elmmo
MIMAT0003199	rno-miR-381-3p	Pou4f2	171355	ENSRNOG00000012167	NA	NA	NA	predicted	0.703	elmmo
MIMAT0003199	rno-miR-381-3p	LOC100909609	309081	ENSRNOG00000018683	NA	NA	NA	predicted	0.703	elmmo
MIMAT0003199	rno-miR-381-3p	Coro1c	501841	ENSRNOG00000000697	NA	NA	NA	predicted	0.703	elmmo
MIMAT0003199	rno-miR-381-3p	Fa2h	307855	ENSRNOG00000018950	NA	NA	NA	predicted	0.703	elmmo
MIMAT0003199	rno-miR-381-3p	Mbnl2	680445	ENSRNOG00000010737	NA	NA	NA	predicted	0.703	elmmo
MIMAT0003199	rno-miR-381-3p	Ice1	306665	ENSRNOG00000023053	NA	NA	NA	predicted	0.703	elmmo
MIMAT0003199	rno-miR-381-3p	Cldn12	500000	ENSRNOG00000039862	NA	NA	NA	predicted	0.703	elmmo
MIMAT0003199	rno-miR-381-3p	Ccnt2	304758	ENSRNOG00000017113	NA	NA	NA	predicted	0.703	elmmo
MIMAT0003199	rno-miR-381-3p	RGD1310049	292199	ENSRNOG00000042309	NA	NA	NA	predicted	0.696	elmmo
MIMAT0003199	rno-miR-381-3p	Zbtb49	305428	ENSRNOG00000005633	NA	NA	NA	predicted	0.696	elmmo
MIMAT0003199	rno-miR-381-3p	Fnbp4	311183	ENSRNOG00000007241	NA	NA	NA	predicted	0.696	elmmo
MIMAT0003199	rno-miR-381-3p	Gria3	29628	ENSRNOG00000007682	NA	NA	NA	predicted	0.696	elmmo
MIMAT0003199	rno-miR-381-3p	Hes1	29577	ENSRNOG00000001720	NA	NA	NA	predicted	0.696	elmmo
MIMAT0003199	rno-miR-381-3p	Nup35	295692	ENSRNOG00000009290	NA	NA	NA	predicted	0.692	elmmo
MIMAT0003199	rno-miR-381-3p	Ctdp1	291414	ENSRNOG00000061474	NA	NA	NA	predicted	0.692	elmmo
MIMAT0003199	rno-miR-381-3p	Ctdspl	301056	ENSRNOG00000046257	NA	NA	NA	predicted	0.692	elmmo
MIMAT0003199	rno-miR-381-3p	Brd4	362844	ENSRNOG00000006770	NA	NA	NA	predicted	0.659	elmmo
MIMAT0003199	rno-miR-381-3p	Cort	117548	ENSRNOG00000030317	NA	NA	NA	predicted	0.653	elmmo
MIMAT0003199	rno-miR-381-3p	Pgd	117548	ENSRNOG00000030317	NA	NA	NA	predicted	0.653	elmmo
MIMAT0003199	rno-miR-381-3p	Kif1b	117548	ENSRNOG00000057626	NA	NA	NA	predicted	0.653	elmmo
MIMAT0003199	rno-miR-381-3p	Apitd1	117548	ENSRNOG00000030317	NA	NA	NA	predicted	0.653	elmmo
MIMAT0003199	rno-miR-381-3p	Msx2	25483	ENSRNOG00000018355	NA	NA	NA	predicted	0.646	elmmo
MIMAT0003199	rno-miR-381-3p	Dnajc27	298859	ENSRNOG00000003988	NA	NA	NA	predicted	0.646	elmmo
MIMAT0003199	rno-miR-381-3p	Plekhg5	310999	ENSRNOG00000022694	NA	NA	NA	predicted	0.646	elmmo
MIMAT0003199	rno-miR-381-3p	Hiat1	100134827	ENSRNOG00000050407	NA	NA	NA	predicted	0.646	elmmo
MIMAT0003199	rno-miR-381-3p	Tusc3	290783	ENSRNOG00000013061	NA	NA	NA	predicted	0.646	elmmo
MIMAT0003199	rno-miR-381-3p	Dync1li2	81655	ENSRNOG00000025791	NA	NA	NA	predicted	0.642	elmmo
MIMAT0003199	rno-miR-381-3p	Plag1	297804	ENSRNOG00000008846	NA	NA	NA	predicted	0.641	elmmo
MIMAT0003199	rno-miR-381-3p	Clcf1	365395	ENSRNOG00000018752	NA	NA	NA	predicted	0.641	elmmo
MIMAT0003199	rno-miR-381-3p	Exo1	305000	ENSRNOG00000003876	NA	NA	NA	predicted	0.641	elmmo
MIMAT0003199	rno-miR-381-3p	Tmed7	252889	ENSRNOG00000003691	NA	NA	NA	predicted	0.641	elmmo
MIMAT0003199	rno-miR-381-3p	Tchp	304547	ENSRNOG00000001191	NA	NA	NA	predicted	0.641	elmmo
MIMAT0003199	rno-miR-381-3p	Usp42	288482	ENSRNOG00000001059	NA	NA	NA	predicted	0.641	elmmo
MIMAT0003199	rno-miR-381-3p	Ctu2	292069	ENSRNOG00000028270	NA	NA	NA	predicted	0.641	elmmo
MIMAT0003199	rno-miR-381-3p	Nup153	25281	ENSRNOG00000001456	NA	NA	NA	predicted	0.641	elmmo
MIMAT0003199	rno-miR-381-3p	Sh2d1a	501502	ENSRNOG00000006263	NA	NA	NA	predicted	0.641	elmmo
MIMAT0003199	rno-miR-381-3p	Rreb1	306873	ENSRNOG00000015701	NA	NA	NA	predicted	0.635	elmmo
MIMAT0003199	rno-miR-381-3p	Zdhhc9	302808	ENSRNOG00000004581	NA	NA	NA	predicted	0.635	elmmo
MIMAT0003199	rno-miR-381-3p	Cd24	25145	ENSRNOG00000000321	NA	NA	NA	predicted	0.635	elmmo
MIMAT0003199	rno-miR-381-3p	Fezf1	500048	ENSRNOG00000007608	NA	NA	NA	predicted	0.635	elmmo
MIMAT0003199	rno-miR-381-3p	Kctd4	691835	ENSRNOG00000050996	NA	NA	NA	predicted	0.635	elmmo
MIMAT0003199	rno-miR-381-3p	Dot1l	362831	ENSRNOG00000032546	NA	NA	NA	predicted	0.635	elmmo
MIMAT0003199	rno-miR-381-3p	Gabrb3	24922	ENSRNOG00000014938	NA	NA	NA	predicted	0.635	elmmo
MIMAT0003199	rno-miR-381-3p	LOC100910882	100910882	ENSRNOG00000049814	NA	NA	NA	predicted	0.633	elmmo
MIMAT0003199	rno-miR-381-3p	Rbm39	362251	ENSRNOG00000049814	NA	NA	NA	predicted	0.633	elmmo
MIMAT0003199	rno-miR-381-3p	Tcf3	171046	ENSRNOG00000051499	NA	NA	NA	predicted	0.633	elmmo
MIMAT0003199	rno-miR-381-3p	Tra2a	500116	ENSRNOG00000009156	NA	NA	NA	predicted	0.633	elmmo
MIMAT0003199	rno-miR-381-3p	Tm9sf2	306197	ENSRNOG00000012751	NA	NA	NA	predicted	0.633	elmmo
MIMAT0003199	rno-miR-381-3p	Ppp2r5e	299147	ENSRNOG00000005045	NA	NA	NA	predicted	0.633	elmmo
MIMAT0003199	rno-miR-381-3p	Sp1	24790	ENSRNOG00000014084	NA	NA	NA	predicted	0.633	elmmo
MIMAT0003199	rno-miR-381-3p	Kif11	171304	ENSRNOG00000056069	NA	NA	NA	predicted	0.633	elmmo
MIMAT0003199	rno-miR-381-3p	Ccdc126	500117	ENSRNOG00000009322	NA	NA	NA	predicted	0.633	elmmo
MIMAT0003199	rno-miR-381-3p	Rnf144b	364681	ENSRNOG00000016123	NA	NA	NA	predicted	0.63	elmmo
MIMAT0003199	rno-miR-381-3p	Stk4	311622	ENSRNOG00000013529	NA	NA	NA	predicted	0.63	elmmo
MIMAT0003199	rno-miR-381-3p	Asic4	63882	ENSRNOG00000019985	NA	NA	NA	predicted	0.63	elmmo
MIMAT0003199	rno-miR-381-3p	Tmem178a	362691	ENSRNOG00000007907	NA	NA	NA	predicted	0.63	elmmo
MIMAT0003199	rno-miR-381-3p	Exosc7	316098	ENSRNOG00000060337	NA	NA	NA	predicted	0.63	elmmo
MIMAT0003199	rno-miR-381-3p	Myf6	25714	ENSRNOG00000004878	NA	NA	NA	predicted	0.615	elmmo
MIMAT0003199	rno-miR-381-3p	Usp1	313387	ENSRNOG00000007890	NA	NA	NA	predicted	0.608	elmmo
MIMAT0003199	rno-miR-381-3p	Dclk1	83825	ENSRNOG00000032922	NA	NA	NA	predicted	0.608	elmmo
MIMAT0003199	rno-miR-381-3p	Rsbn1	310749	ENSRNOG00000019671	NA	NA	NA	predicted	0.607	elmmo
MIMAT0003199	rno-miR-381-3p	Cops7a	312710	ENSRNOG00000016778	NA	NA	NA	predicted	0.607	elmmo
MIMAT0003199	rno-miR-381-3p	Ampd3	25095	ENSRNOG00000018262	NA	NA	NA	predicted	0.607	elmmo
MIMAT0003199	rno-miR-381-3p	LOC100363472	100363472	ENSRNOG00000000641	NA	NA	NA	predicted	0.607	elmmo
MIMAT0003199	rno-miR-381-3p	Rfx7	315804	ENSRNOG00000060367	NA	NA	NA	predicted	0.607	elmmo
MIMAT0003199	rno-miR-381-3p	Mdm1	314859	ENSRNOG00000007286	NA	NA	NA	predicted	0.607	elmmo
MIMAT0003199	rno-miR-381-3p	Lpar6	691774	ENSRNOG00000015577	NA	NA	NA	predicted	0.607	elmmo
MIMAT0003199	rno-miR-381-3p	U2surp	315903	ENSRNOG00000008607	NA	NA	NA	predicted	0.607	elmmo
MIMAT0003199	rno-miR-381-3p	Stat3	25125	ENSRNOG00000019742	NA	NA	NA	predicted	0.607	elmmo
MIMAT0003199	rno-miR-381-3p	Nrbf2	100363472	ENSRNOG00000000641	NA	NA	NA	predicted	0.607	elmmo
MIMAT0003199	rno-miR-381-3p	Ap1s3	367304	ENSRNOG00000049873	NA	NA	NA	predicted	0.607	elmmo
MIMAT0003199	rno-miR-381-3p	Ubr7	314399	ENSRNOG00000008108	NA	NA	NA	predicted	0.607	elmmo
MIMAT0003199	rno-miR-381-3p	RGD1560263	100363472	ENSRNOG00000000641	NA	NA	NA	predicted	0.607	elmmo
MIMAT0003199	rno-miR-381-3p	Irf4	291100	ENSRNOG00000061070	NA	NA	NA	predicted	0.607	elmmo
MIMAT0003199	rno-miR-381-3p	Ccnk	500715	ENSRNOG00000006985	NA	NA	NA	predicted	0.603	elmmo
MIMAT0003199	rno-miR-381-3p	Ppp1r26	685398	ENSRNOG00000027193	NA	NA	NA	predicted	0.601	elmmo
MIMAT0003199	rno-miR-381-3p	Vegfa	83785	ENSRNOG00000019598	NA	NA	NA	predicted	0.601	elmmo
MIMAT0003199	rno-miR-381-3p	Bnc1	365299	ENSRNOG00000019770	NA	NA	NA	predicted	0.601	elmmo
MIMAT0003199	rno-miR-381-3p	Mdfic	362325	ENSRNOG00000053787	NA	NA	NA	predicted	0.6	elmmo
MIMAT0003199	rno-miR-381-3p	Srsf5	29667	ENSRNOG00000005513	NA	NA	NA	predicted	0.574	elmmo
MIMAT0003199	rno-miR-381-3p	Prickle1	315259	ENSRNOG00000022772	NA	NA	NA	predicted	0.57	elmmo
MIMAT0003199	rno-miR-381-3p	Nlgn1	116647	ENSRNOG00000032576	NA	NA	NA	predicted	0.563	elmmo
MIMAT0003199	rno-miR-381-3p	Yeats4	299810	ENSRNOG00000005689	NA	NA	NA	predicted	0.563	elmmo
MIMAT0003199	rno-miR-381-3p	Rpl35a	102554437	ENSRNOG00000031641	NA	NA	NA	predicted	0.556	elmmo
MIMAT0003199	rno-miR-381-3p	Atl2	298757	ENSRNOG00000006523	NA	NA	NA	predicted	0.556	elmmo
MIMAT0003199	rno-miR-381-3p	RragB	100909655	ENSRNOG00000003160	NA	NA	NA	predicted	0.556	elmmo
MIMAT0003199	rno-miR-381-3p	Cdk19	309804	ENSRNOG00000000583	NA	NA	NA	predicted	0.556	elmmo
MIMAT0003199	rno-miR-381-3p	Ppig	83624	ENSRNOG00000007673	NA	NA	NA	predicted	0.556	elmmo
MIMAT0003199	rno-miR-381-3p	LOC100909655	117043	ENSRNOG00000003160	NA	NA	NA	predicted	0.556	elmmo
MIMAT0003199	rno-miR-381-3p	Dclk3	316023	ENSRNOG00000033026	NA	NA	NA	predicted	0.556	elmmo
MIMAT0003199	rno-miR-381-3p	B3gnt5	116740	ENSRNOG00000046258	NA	NA	NA	predicted	0.556	elmmo
MIMAT0003199	rno-miR-381-3p	Lrrc32	293135	ENSRNOG00000015310	NA	NA	NA	predicted	0.556	elmmo
MIMAT0003199	rno-miR-381-3p	Adrb2	24176	ENSRNOG00000019217	NA	NA	NA	predicted	0.556	elmmo
MIMAT0003199	rno-miR-381-3p	Brd7	361374	ENSRNOG00000014419	NA	NA	NA	predicted	0.556	elmmo
MIMAT0003199	rno-miR-381-3p	Rcan2	140666	ENSRNOG00000010350	NA	NA	NA	predicted	0.556	elmmo
MIMAT0003199	rno-miR-381-3p	Cbfb	361391	ENSRNOG00000014647	NA	NA	NA	predicted	0.556	elmmo
MIMAT0003199	rno-miR-381-3p	Eri2	691484	ENSRNOG00000014673	NA	NA	NA	predicted	0.556	elmmo
MIMAT0003199	rno-miR-381-3p	Igfbp3	24484	ENSRNOG00000061910	NA	NA	NA	predicted	0.556	elmmo
MIMAT0003199	rno-miR-381-3p	Zmym6	362602	ENSRNOG00000013865	NA	NA	NA	predicted	0.556	elmmo
MIMAT0003199	rno-miR-381-3p	Cggbp1	288353	ENSRNOG00000000718	NA	NA	NA	predicted	0.556	elmmo
MIMAT0003199	rno-miR-381-3p	Atp6v1h	297797	ENSRNOG00000030862	NA	NA	NA	predicted	0.556	elmmo
MIMAT0003199	rno-miR-381-3p	Gja1	24392	ENSRNOG00000000805	NA	NA	NA	predicted	0.556	elmmo
MIMAT0003199	rno-miR-381-3p	Nap1l5	688843	ENSRNOG00000007808	NA	NA	NA	predicted	0.556	elmmo
MIMAT0003199	rno-miR-381-3p	Col13a1	499431	ENSRNOG00000000552	NA	NA	NA	predicted	0.556	elmmo
MIMAT0003199	rno-miR-381-3p	Agpat3	294324	ENSRNOG00000001205	NA	NA	NA	predicted	0.556	elmmo
MIMAT0003199	rno-miR-381-3p	Kctd3	305055	ENSRNOG00000002627	NA	NA	NA	predicted	0.556	elmmo
MIMAT0003199	rno-miR-381-3p	Col4a1	290905	ENSRNOG00000016281	NA	NA	NA	predicted	0.556	elmmo
MIMAT0003199	rno-miR-381-3p	Lin54	305171	ENSRNOG00000002203	NA	NA	NA	predicted	0.551	elmmo
MIMAT0003199	rno-miR-381-3p	Pcgf5	681178	ENSRNOG00000018532	NA	NA	NA	predicted	0.551	elmmo
MIMAT0003199	rno-miR-381-3p	Gdi2	29662	ENSRNOG00000018091	NA	NA	NA	predicted	0.551	elmmo
MIMAT0003199	rno-miR-381-3p	Zcchc24	361104	ENSRNOG00000040205	NA	NA	NA	predicted	0.551	elmmo
MIMAT0003199	rno-miR-381-3p	Mmgt1	302864	ENSRNOG00000000881	NA	NA	NA	predicted	0.538	elmmo
MIMAT0003199	rno-miR-381-3p	Ets2	304063	ENSRNOG00000001647	NA	NA	NA	predicted	0.533	elmmo
MIMAT0003199	rno-miR-381-3p	RGD1305537	363528	ENSRNOG00000045696	NA	NA	NA	predicted	0.533	elmmo
MIMAT0003199	rno-miR-381-3p	Lsm1	364624	ENSRNOG00000015375	NA	NA	NA	predicted	0.533	elmmo
MIMAT0003199	rno-miR-381-3p	Fam174a	301634	ENSRNOG00000019087	NA	NA	NA	predicted	0.533	elmmo
MIMAT0003199	rno-miR-381-3p	Spast	362700	ENSRNOG00000027136	NA	NA	NA	predicted	0.523	elmmo
MIMAT0003199	rno-miR-381-3p	Vps13b	102555534	ENSRNOG00000010865	NA	NA	NA	predicted	0.501	elmmo
MIMAT0003199	rno-miR-381-3p	Rapgef5	362799	ENSRNOG00000005271	NA	NA	NA	predicted	0.501	elmmo
MIMAT0003199	rno-miR-381-3p	Xirp2	311098	ENSRNOG00000034258	NA	NA	NA	predicted	0.501	elmmo
MIMAT0003199	rno-miR-381-3p	Arap2	305367	ENSRNOG00000056826	NA	NA	NA	predicted	0.501	elmmo
MIMAT0003199	rno-miR-381-3p	Kit	64030	ENSRNOG00000002227	NA	NA	NA	predicted	0.501	elmmo
MIMAT0003199	rno-miR-381-3p	Snca	29219	ENSRNOG00000008656	NA	NA	NA	predicted	0.501	elmmo
MIMAT0003199	rno-miR-381-3p	Tmem135	293098	ENSRNOG00000016815	NA	NA	NA	predicted	0.501	elmmo
MIMAT0003199	rno-miR-381-3p	Slc25a24	310791	ENSRNOG00000020470	NA	NA	NA	predicted	0.501	elmmo
MIMAT0003199	rno-miR-381-3p	Dyrk3	304775	ENSRNOG00000004870	NA	NA	NA	predicted	0.501	elmmo
MIMAT0003199	rno-miR-381-3p	LOC289641	305367	ENSRNOG00000002209	NA	NA	NA	predicted	0.501	elmmo
MIMAT0003199	rno-miR-381-3p	RGD1305014	309029	ENSRNOG00000020597	NA	NA	NA	predicted	0.501	elmmo
MIMAT0003199	rno-miR-381-3p	Sorcs3	294043	ENSRNOG00000028832	NA	NA	NA	predicted	0.501	elmmo
MIMAT0003199	rno-miR-381-3p	Syf2	170933	ENSRNOG00000060597	NA	NA	NA	predicted	0.501	elmmo
MIMAT0003199	rno-miR-381-3p	Gpr45	301372	ENSRNOG00000016446	NA	NA	NA	predicted	0.501	elmmo
MIMAT0003199	rno-miR-381-3p	Klf9	117560	ENSRNOG00000014215	NA	NA	NA	predicted	0.501	elmmo
MIMAT0003199	rno-miR-381-3p	Dnali1	298524	ENSRNOG00000024957	NA	NA	NA	predicted	0.501	elmmo
MIMAT0003199	rno-miR-381-3p	Map1b	29456	ENSRNOG00000017428	NA	NA	NA	predicted	0.501	elmmo
MIMAT0003199	rno-miR-381-3p	Lamtor5	295357	ENSRNOG00000018186	NA	NA	NA	predicted	0.501	elmmo
MIMAT0003199	rno-miR-381-3p	Lhx8	365963	ENSRNOG00000028348	NA	NA	NA	predicted	0.501	elmmo
MIMAT0003199	rno-miR-381-3p	Zbtb22	309630	ENSRNOG00000000476	NA	NA	NA	predicted	0.498	elmmo
MIMAT0003199	rno-miR-381-3p	Csnk1g3	64823	ENSRNOG00000016677	NA	NA	NA	predicted	0.493	elmmo
MIMAT0003199	rno-miR-381-3p	Cep76	291540	ENSRNOG00000021918	NA	NA	NA	predicted	0.493	elmmo
MIMAT0003199	rno-miR-381-3p	Atl1	362750	ENSRNOG00000005063	NA	NA	NA	predicted	0.493	elmmo
MIMAT0003199	rno-miR-381-3p	RGD1307235	309053	ENSRNOG00000015508	NA	NA	NA	predicted	0.493	elmmo
MIMAT0003199	rno-miR-381-3p	Nek7	360850	ENSRNOG00000000657	NA	NA	NA	predicted	0.493	elmmo
MIMAT0003199	rno-miR-381-3p	Suv39h2	364785	ENSRNOG00000015585	NA	NA	NA	predicted	0.493	elmmo
MIMAT0003199	rno-miR-381-3p	Vav3	295378	ENSRNOG00000020485	NA	NA	NA	predicted	0.493	elmmo
MIMAT0003199	rno-miR-381-3p	Wwc2	498630	ENSRNOG00000013248	NA	NA	NA	predicted	0.493	elmmo
MIMAT0003199	rno-miR-381-3p	Srsf9	288701	ENSRNOG00000001163	NA	NA	NA	predicted	0.493	elmmo
MIMAT0003199	rno-miR-381-3p	Ccdc34	362187	ENSRNOG00000005902	NA	NA	NA	predicted	0.493	elmmo
MIMAT0003199	rno-miR-381-3p	Cldn1	65129	ENSRNOG00000001926	NA	NA	NA	predicted	0.493	elmmo
MIMAT0003199	rno-miR-381-3p	Gldc	309312	ENSRNOG00000011599	NA	NA	NA	predicted	0.487	elmmo
MIMAT0003199	rno-miR-381-3p	Mex3c	307271	ENSRNOG00000015777	NA	NA	NA	predicted	0.461	elmmo
MIMAT0003199	rno-miR-381-3p	RGD1307100	294978	ENSRNOG00000038436	NA	NA	NA	predicted	0.459	elmmo
MIMAT0003199	rno-miR-381-3p	Npy1r	29358	ENSRNOG00000014149	NA	NA	NA	predicted	0.459	elmmo
MIMAT0003199	rno-miR-381-3p	RGD1359508	361941	ENSRNOG00000038330	NA	NA	NA	predicted	0.459	elmmo
MIMAT0003199	rno-miR-381-3p	Masp1	64023	ENSRNOG00000001827	NA	NA	NA	predicted	0.459	elmmo
MIMAT0003199	rno-miR-381-3p	Creld2	362978	ENSRNOG00000004659	NA	NA	NA	predicted	0.459	elmmo
MIMAT0003199	rno-miR-381-3p	Rabggtb	25533	ENSRNOG00000009992	NA	NA	NA	predicted	0.459	elmmo
MIMAT0003199	rno-miR-381-3p	Npat	315666	ENSRNOG00000024934	NA	NA	NA	predicted	0.455	elmmo
MIMAT0003199	rno-miR-381-3p	Lppr5	310812	ENSRNOG00000016878	NA	NA	NA	predicted	0.455	elmmo
MIMAT0003199	rno-miR-381-3p	Nhlh2	295327	ENSRNOG00000054375	NA	NA	NA	predicted	0.447	elmmo
MIMAT0003199	rno-miR-381-3p	Nbr1	303554	ENSRNOG00000020730	NA	NA	NA	predicted	0.424	elmmo
MIMAT0003199	rno-miR-381-3p	LOC306766	306766	ENSRNOG00000017133	NA	NA	NA	predicted	0.424	elmmo
MIMAT0003199	rno-miR-381-3p	Tnks2	309512	ENSRNOG00000052664	NA	NA	NA	predicted	0.424	elmmo
MIMAT0003199	rno-miR-381-3p	Pawr	64513	ENSRNOG00000005917	NA	NA	NA	predicted	0.424	elmmo
MIMAT0003199	rno-miR-381-3p	LOC100910717	309512	ENSRNOG00000052664	NA	NA	NA	predicted	0.424	elmmo
MIMAT0003199	rno-miR-381-3p	LOC498369	303554	ENSRNOG00000020730	NA	NA	NA	predicted	0.424	elmmo
MIMAT0003199	rno-miR-381-3p	Gp1ba	691992	ENSRNOG00000025959	NA	NA	NA	predicted	0.423	elmmo
MIMAT0003199	rno-miR-381-3p	Btbd1	293060	ENSRNOG00000019529	NA	NA	NA	predicted	0.423	elmmo
MIMAT0003199	rno-miR-381-3p	Sele	25544	ENSRNOG00000002723	NA	NA	NA	predicted	0.423	elmmo
MIMAT0003199	rno-miR-381-3p	Trim69	311373	ENSRNOG00000017157	NA	NA	NA	predicted	0.423	elmmo
MIMAT0003199	rno-miR-381-3p	Cbx5	300266	ENSRNOG00000036841	NA	NA	NA	predicted	0.423	elmmo
MIMAT0003199	rno-miR-381-3p	Lpcat3	362434	ENSRNOG00000012269	NA	NA	NA	predicted	0.423	elmmo
MIMAT0003199	rno-miR-381-3p	Pyroxd2	309381	ENSRNOG00000015807	NA	NA	NA	predicted	0.423	elmmo
MIMAT0003199	rno-miR-381-3p	Tbc1d31	299949	ENSRNOG00000006103	NA	NA	NA	predicted	0.423	elmmo
MIMAT0003199	rno-miR-381-3p	Clk1	301434	ENSRNOG00000025768	NA	NA	NA	predicted	0.423	elmmo
MIMAT0003199	rno-miR-381-3p	Erc1	266806	ENSRNOG00000009264	NA	NA	NA	predicted	0.423	elmmo
MIMAT0003199	rno-miR-381-3p	Anxa4	79124	ENSRNOG00000018159	NA	NA	NA	predicted	0.423	elmmo
MIMAT0003199	rno-miR-381-3p	Stx7	60466	ENSRNOG00000015670	NA	NA	NA	predicted	0.423	elmmo
MIMAT0003199	rno-miR-381-3p	Nedd9	291044	ENSRNOG00000014548	NA	NA	NA	predicted	0.423	elmmo
MIMAT0003199	rno-miR-381-3p	Sema3f	315996	ENSRNOG00000017704	NA	NA	NA	predicted	0.423	elmmo
MIMAT0003199	rno-miR-381-3p	Znrf2	362367	ENSRNOG00000049057	NA	NA	NA	predicted	0.412	elmmo
MIMAT0003199	rno-miR-381-3p	Fbxo43	315034	ENSRNOG00000010459	NA	NA	NA	predicted	0.403	elmmo
MIMAT0003199	rno-miR-381-3p	Ruvbl2	292907	ENSRNOG00000020793	NA	NA	NA	predicted	0.402	elmmo
MIMAT0003199	rno-miR-381-3p	Ptp4a1	29463	ENSRNOG00000011771	NA	NA	NA	predicted	0.396	elmmo
MIMAT0003199	rno-miR-381-3p	Rhpn2	308516	ENSRNOG00000011885	NA	NA	NA	predicted	0.396	elmmo
MIMAT0003199	rno-miR-381-3p	Aak1	500244	ENSRNOG00000018317	NA	NA	NA	predicted	0.396	elmmo
MIMAT0003199	rno-miR-381-3p	Ammecr1	501539	ENSRNOG00000022166	NA	NA	NA	predicted	0.396	elmmo
MIMAT0003199	rno-miR-381-3p	Efs	290212	ENSRNOG00000042029	NA	NA	NA	predicted	0.394	elmmo
MIMAT0003199	rno-miR-381-3p	Cdk1	54237	ENSRNOG00000000632	NA	NA	NA	predicted	0.391	elmmo
MIMAT0003199	rno-miR-381-3p	Pms1	494322	ENSRNOG00000004076	NA	NA	NA	predicted	0.39	elmmo
MIMAT0003199	rno-miR-381-3p	Brd1	315210	ENSRNOG00000004538	NA	NA	NA	predicted	0.373	elmmo
MIMAT0003199	rno-miR-381-3p	Cbln4	499947	ENSRNOG00000004372	NA	NA	NA	predicted	0.373	elmmo
MIMAT0003199	rno-miR-381-3p	Lgalsl	360983	ENSRNOG00000005464	NA	NA	NA	predicted	0.373	elmmo
MIMAT0003199	rno-miR-381-3p	Trappc2	501550	ENSRNOG00000042276	NA	NA	NA	predicted	0.373	elmmo
MIMAT0003199	rno-miR-381-3p	Gpr37	117549	ENSRNOG00000002524	NA	NA	NA	predicted	0.373	elmmo
MIMAT0003199	rno-miR-381-3p	Zbtb10	80338	ENSRNOG00000061862	NA	NA	NA	predicted	0.373	elmmo
MIMAT0003199	rno-miR-381-3p	Ocln	83497	ENSRNOG00000018297	NA	NA	NA	predicted	0.373	elmmo
MIMAT0003199	rno-miR-381-3p	Otud7b	310677	ENSRNOG00000042068	NA	NA	NA	predicted	0.373	elmmo
MIMAT0003199	rno-miR-381-3p	Clcn3	84360	ENSRNOG00000010682	NA	NA	NA	predicted	0.373	elmmo
MIMAT0003199	rno-miR-381-3p	Atp6v1a	685232	ENSRNOG00000001992	NA	NA	NA	predicted	0.373	elmmo
MIMAT0003199	rno-miR-381-3p	Gpr88	64443	ENSRNOG00000026953	NA	NA	NA	predicted	0.373	elmmo
MIMAT0003199	rno-miR-381-3p	Ip6k2	59268	ENSRNOG00000020361	NA	NA	NA	predicted	0.373	elmmo
MIMAT0003199	rno-miR-381-3p	Gin1	316687	ENSRNOG00000011962	NA	NA	NA	predicted	0.373	elmmo
MIMAT0003199	rno-miR-381-3p	Sall2	305854	ENSRNOG00000013287	NA	NA	NA	predicted	0.373	elmmo
MIMAT0003199	rno-miR-381-3p	Cnr1	25248	ENSRNOG00000008223	NA	NA	NA	predicted	0.373	elmmo
MIMAT0003199	rno-miR-381-3p	Cstf2t	309338	ENSRNOG00000050289	NA	NA	NA	predicted	0.373	elmmo
MIMAT0003199	rno-miR-381-3p	Ccdc117	498404	ENSRNOG00000010706	NA	NA	NA	predicted	0.373	elmmo
MIMAT0003199	rno-miR-381-3p	Plch1	310463	ENSRNOG00000009955	NA	NA	NA	predicted	0.373	elmmo
MIMAT0003199	rno-miR-381-3p	Ick	84411	ENSRNOG00000008691	NA	NA	NA	predicted	0.373	elmmo
MIMAT0003199	rno-miR-381-3p	Rsrp1	362626	ENSRNOG00000017309	NA	NA	NA	predicted	0.373	elmmo
MIMAT0003199	rno-miR-381-3p	Zfyve16	499508	ENSRNOG00000013055	NA	NA	NA	predicted	0.373	elmmo
MIMAT0003199	rno-miR-381-3p	Atg14	305831	ENSRNOG00000011873	NA	NA	NA	predicted	0.373	elmmo
MIMAT0003199	rno-miR-381-3p	Zfp865	308337	ENSRNOG00000016279	NA	NA	NA	predicted	0.373	elmmo
MIMAT0003199	rno-miR-381-3p	Dgat2	252900	ENSRNOG00000016573	NA	NA	NA	predicted	0.373	elmmo
MIMAT0003199	rno-miR-381-3p	Chst14	691394	ENSRNOG00000045997	NA	NA	NA	predicted	0.371	elmmo
MIMAT0003199	rno-miR-381-3p	Morf4l2	317413	ENSRNOG00000002389	NA	NA	NA	predicted	0.371	elmmo
MIMAT0003199	rno-miR-381-3p	Lamtor3	362045	ENSRNOG00000010552	NA	NA	NA	predicted	0.371	elmmo
MIMAT0003199	rno-miR-381-3p	Tyro3	25232	ENSRNOG00000058586	NA	NA	NA	predicted	0.371	elmmo
MIMAT0003199	rno-miR-381-3p	Lpgat1	679692	ENSRNOG00000004402	NA	NA	NA	predicted	0.358	elmmo
MIMAT0003199	rno-miR-381-3p	Nkx6-2	309095	ENSRNOG00000017748	NA	NA	NA	predicted	0.357	elmmo
MIMAT0003199	rno-miR-381-3p	Mageb16	317274	ENSRNOG00000029408	NA	NA	NA	predicted	0.357	elmmo
MIMAT0003199	rno-miR-381-3p	Pdha1	29554	ENSRNOG00000025383	NA	NA	NA	predicted	0.357	elmmo
MIMAT0003199	rno-miR-381-3p	Elmod2	688581	ENSRNOG00000028176	NA	NA	NA	predicted	0.357	elmmo
MIMAT0003199	rno-miR-381-3p	Arid3b	367092	ENSRNOG00000019677	NA	NA	NA	predicted	0.357	elmmo
MIMAT0003199	rno-miR-381-3p	Psd2	307500	ENSRNOG00000019177	NA	NA	NA	predicted	0.357	elmmo
MIMAT0003199	rno-miR-381-3p	Klhl33	100362676	ENSRNOG00000025868	NA	NA	NA	predicted	0.357	elmmo
MIMAT0003199	rno-miR-381-3p	Pdha1l1	29554	ENSRNOG00000025383	NA	NA	NA	predicted	0.357	elmmo
MIMAT0003199	rno-miR-381-3p	Meox2	29279	ENSRNOG00000006588	NA	NA	NA	predicted	0.357	elmmo
MIMAT0003199	rno-miR-381-3p	LOC100910164	688581	ENSRNOG00000028176	NA	NA	NA	predicted	0.357	elmmo
MIMAT0003199	rno-miR-381-3p	Tmem47	501569	ENSRNOG00000030418	NA	NA	NA	predicted	0.357	elmmo
MIMAT0003199	rno-miR-381-3p	Elmo1	361251	ENSRNOG00000059705	NA	NA	NA	predicted	0.357	elmmo
MIMAT0003199	rno-miR-381-3p	Fam26e	294431	ENSRNOG00000000825	NA	NA	NA	predicted	0.357	elmmo
MIMAT0003199	rno-miR-381-3p	LOC100365902	29554	ENSRNOG00000025383	NA	NA	NA	predicted	0.357	elmmo
MIMAT0003199	rno-miR-381-3p	Nudt9	305149	ENSRNOG00000002186	NA	NA	NA	predicted	0.357	elmmo
MIMAT0003199	rno-miR-381-3p	Ubqln2	317396	ENSRNOG00000003099	NA	NA	NA	predicted	0.357	elmmo
MIMAT0003199	rno-miR-381-3p	Jrkl	315417	ENSRNOG00000047133	NA	NA	NA	predicted	0.357	elmmo
MIMAT0003199	rno-miR-381-3p	LOC100361515	303251	ENSRNOG00000017915	NA	NA	NA	predicted	0.351	elmmo
MIMAT0003199	rno-miR-381-3p	Dvl2	303251	ENSRNOG00000017915	NA	NA	NA	predicted	0.351	elmmo
MIMAT0003199	rno-miR-381-3p	Plcxd2	363781	ENSRNOG00000042289	NA	NA	NA	predicted	0.311	elmmo
MIMAT0003199	rno-miR-381-3p	Ppm1l	310506	ENSRNOG00000046168	NA	NA	NA	predicted	0.311	elmmo
MIMAT0003199	rno-miR-381-3p	Fbxl3	306129	ENSRNOG00000059334	NA	NA	NA	predicted	0.311	elmmo
MIMAT0003199	rno-miR-381-3p	Ppp2r5a	102547086	ENSRNOG00000000068	NA	NA	NA	predicted	0.311	elmmo
MIMAT0003199	rno-miR-381-3p	Kansl2	300206	ENSRNOG00000060185	NA	NA	NA	predicted	0.311	elmmo
MIMAT0003199	rno-miR-381-3p	Ltn1	288308	ENSRNOG00000001602	NA	NA	NA	predicted	0.311	elmmo
MIMAT0003199	rno-miR-381-3p	Pdik1l	313609	ENSRNOG00000016536	NA	NA	NA	predicted	0.311	elmmo
MIMAT0003199	rno-miR-381-3p	Fam3c	312159	ENSRNOG00000060349	NA	NA	NA	predicted	0.293	elmmo
MIMAT0003199	rno-miR-381-3p	Lrrc7	117284	ENSRNOG00000011980	NA	NA	NA	predicted	0.293	elmmo
MIMAT0003199	rno-miR-381-3p	Slc30a5	294698	ENSRNOG00000018746	NA	NA	NA	predicted	0.293	elmmo
MIMAT0003199	rno-miR-381-3p	Wdfy3	305164	ENSRNOG00000061121	NA	NA	NA	predicted	0.293	elmmo
MIMAT0003199	rno-miR-381-3p	Mtmr10	309255	ENSRNOG00000016090	NA	NA	NA	predicted	0.293	elmmo
MIMAT0003199	rno-miR-381-3p	Zswim4	304655	ENSRNOG00000007582	NA	NA	NA	predicted	0.275	elmmo
MIMAT0003199	rno-miR-381-3p	Tmem128	360952	ENSRNOG00000005346	NA	NA	NA	predicted	0.275	elmmo
MIMAT0003199	rno-miR-381-3p	Elf1	85424	ENSRNOG00000011762	NA	NA	NA	predicted	0.268	elmmo
MIMAT0003199	rno-miR-381-3p	Tmem2	309400	ENSRNOG00000012782	NA	NA	NA	predicted	0.268	elmmo
MIMAT0003199	rno-miR-381-3p	Kif22	293502	ENSRNOG00000020281	NA	NA	NA	predicted	0.268	elmmo
MIMAT0003199	rno-miR-381-3p	Gpr64	266735	ENSRNOG00000032472	NA	NA	NA	predicted	0.264	elmmo
MIMAT0003199	rno-miR-381-3p	Cdh13	192248	ENSRNOG00000014371	NA	NA	NA	predicted	0.264	elmmo
MIMAT0003199	rno-miR-381-3p	Strn4	308392	ENSRNOG00000016145	NA	NA	NA	predicted	0.264	elmmo
MIMAT0003199	rno-miR-381-3p	Smim19	100362321	ENSRNOG00000024930	NA	NA	NA	predicted	0.264	elmmo
MIMAT0003199	rno-miR-381-3p	Trak2	171086	ENSRNOG00000010881	NA	NA	NA	predicted	0.252	elmmo
MIMAT0003199	rno-miR-381-3p	Mgat4a	102554921	ENSRNOG00000018276	NA	NA	NA	predicted	0.252	elmmo
MIMAT0003199	rno-miR-381-3p	LOC100911256	299117	ENSRNOG00000005540	NA	NA	NA	predicted	0.252	elmmo
MIMAT0003199	rno-miR-381-3p	Zfp57	361783	ENSRNOG00000022730	NA	NA	NA	predicted	0.252	elmmo
MIMAT0003199	rno-miR-381-3p	Dcaf7	303602	ENSRNOG00000042245	NA	NA	NA	predicted	0.252	elmmo
MIMAT0003199	rno-miR-381-3p	Higd2a	290999	ENSRNOG00000017372	NA	NA	NA	predicted	0.252	elmmo
MIMAT0003199	rno-miR-381-3p	Socs4	305828	ENSRNOG00000011377	NA	NA	NA	predicted	0.252	elmmo
MIMAT0003199	rno-miR-381-3p	Nin	299117	ENSRNOG00000005540	NA	NA	NA	predicted	0.252	elmmo
MIMAT0003199	rno-miR-381-3p	Ccrl2	316019	ENSRNOG00000033234	NA	NA	NA	predicted	0.252	elmmo
MIMAT0003199	rno-miR-381-3p	Jakmip3	365380	ENSRNOG00000027590	NA	NA	NA	predicted	0.252	elmmo
MIMAT0003199	rno-miR-381-3p	Hs2st1	292155	ENSRNOG00000012549	NA	NA	NA	predicted	0.252	elmmo
MIMAT0003199	rno-miR-381-3p	Usp13	310306	ENSRNOG00000030639	NA	NA	NA	predicted	0.252	elmmo
MIMAT0003199	rno-miR-381-3p	Cpne4	367160	ENSRNOG00000026577	NA	NA	NA	predicted	0.252	elmmo
MIMAT0003199	rno-miR-381-3p	Stard5	502348	ENSRNOG00000025052	NA	NA	NA	predicted	0.251	elmmo
MIMAT0003199	rno-miR-381-3p	Abhd17c	361601	ENSRNOG00000012683	NA	NA	NA	predicted	0.246	elmmo
MIMAT0003199	rno-miR-381-3p	Cpsf1	366952	ENSRNOG00000030705	NA	NA	NA	predicted	0.246	elmmo
MIMAT0003199	rno-miR-381-3p	R3hdm4	362840	ENSRNOG00000011489	NA	NA	NA	predicted	0.246	elmmo
MIMAT0003199	rno-miR-381-3p	Ulk2	303206	ENSRNOG00000002763	NA	NA	NA	predicted	0.246	elmmo
MIMAT0003199	rno-miR-381-3p	Mgat2	94273	ENSRNOG00000004234	NA	NA	NA	predicted	0.246	elmmo
MIMAT0003199	rno-miR-381-3p	Mkks	311456	ENSRNOG00000006705	NA	NA	NA	predicted	0.226	elmmo
MIMAT0003199	rno-miR-381-3p	LOC100360316	114637	ENSRNOG00000051615	NA	NA	NA	predicted	0.226	elmmo
MIMAT0003199	rno-miR-381-3p	Trh	25569	ENSRNOG00000011824	NA	NA	NA	predicted	0.226	elmmo
MIMAT0003199	rno-miR-381-3p	Slc37a4	29573	ENSRNOG00000011361	NA	NA	NA	predicted	0.226	elmmo
MIMAT0003199	rno-miR-381-3p	Lmln	363795	ENSRNOG00000001781	NA	NA	NA	predicted	0.226	elmmo
MIMAT0003199	rno-miR-381-3p	Mat2b	683630	ENSRNOG00000003177	NA	NA	NA	predicted	0.226	elmmo
MIMAT0003199	rno-miR-381-3p	Esco1	680014	ENSRNOG00000014031	NA	NA	NA	predicted	0.226	elmmo
MIMAT0003199	rno-miR-381-3p	Stk16	286927	ENSRNOG00000019294	NA	NA	NA	predicted	0.226	elmmo
MIMAT0003199	rno-miR-381-3p	Ublcp1	360514	ENSRNOG00000004477	NA	NA	NA	predicted	0.226	elmmo
MIMAT0003199	rno-miR-381-3p	Ska2	287598	ENSRNOG00000025981	NA	NA	NA	predicted	0.226	elmmo
MIMAT0003199	rno-miR-381-3p	LOC102549131	100360316	ENSRNOG00000043004	NA	NA	NA	predicted	0.226	elmmo
MIMAT0003199	rno-miR-381-3p	Chodl	288289	ENSRNOG00000001915	NA	NA	NA	predicted	0.226	elmmo
MIMAT0003199	rno-miR-381-3p	Tvp23b	687358	ENSRNOG00000050649	NA	NA	NA	predicted	0.226	elmmo
MIMAT0003199	rno-miR-381-3p	Hmgn2	114637	ENSRNOG00000051615	NA	NA	NA	predicted	0.226	elmmo
MIMAT0003199	rno-miR-381-3p	Inpp5f	309008	ENSRNOG00000020388	NA	NA	NA	predicted	0.226	elmmo
MIMAT0003199	rno-miR-381-3p	Adamtsl3	308787	ENSRNOG00000010840	NA	NA	NA	predicted	0.226	elmmo
MIMAT0003199	rno-miR-381-3p	Cldn16	155268	ENSRNOG00000055138	NA	NA	NA	predicted	0.226	elmmo
MIMAT0003199	rno-miR-381-3p	Zadh2	291403	ENSRNOG00000016239	NA	NA	NA	predicted	0.226	elmmo
MIMAT0003199	rno-miR-381-3p	Tmem27	57395	ENSRNOG00000003960	NA	NA	NA	predicted	0.226	elmmo
MIMAT0003199	rno-miR-381-3p	Gbx2	114500	ENSRNOG00000019495	NA	NA	NA	predicted	0.226	elmmo
MIMAT0003199	rno-miR-381-3p	Asic1	79123	ENSRNOG00000059765	NA	NA	NA	predicted	0.226	elmmo
MIMAT0003199	rno-miR-381-3p	Ctr9	293184	ENSRNOG00000017195	NA	NA	NA	predicted	0.226	elmmo
MIMAT0003199	rno-miR-381-3p	Ppat	117544	ENSRNOG00000002128	NA	NA	NA	predicted	0.226	elmmo
MIMAT0003199	rno-miR-381-3p	Cic	308435	ENSRNOG00000056118	NA	NA	NA	predicted	0.226	elmmo
MIMAT0003199	rno-miR-381-3p	Pip5k1b	309419	ENSRNOG00000015232	NA	NA	NA	predicted	0.226	elmmo
MIMAT0003199	rno-miR-381-3p	Srrm1	313620	ENSRNOG00000018194	NA	NA	NA	predicted	0.226	elmmo
MIMAT0003199	rno-miR-381-3p	Celf5	314647	ENSRNOG00000004695	NA	NA	NA	predicted	0.226	elmmo
MIMAT0003199	rno-miR-381-3p	Nmrk1	499330	ENSRNOG00000012665	NA	NA	NA	predicted	0.226	elmmo
MIMAT0003199	rno-miR-381-3p	Olfm3	252920	ENSRNOG00000017969	NA	NA	NA	predicted	0.226	elmmo
MIMAT0003199	rno-miR-381-3p	Fut9	84597	ENSRNOG00000008475	NA	NA	NA	predicted	0.226	elmmo
MIMAT0003199	rno-miR-381-3p	Kynu	116682	ENSRNOG00000029993	NA	NA	NA	predicted	0.226	elmmo
MIMAT0003199	rno-miR-381-3p	Stau1	84496	ENSRNOG00000007781	NA	NA	NA	predicted	0.226	elmmo
MIMAT0003199	rno-miR-381-3p	Ptk2	25614	ENSRNOG00000007916	NA	NA	NA	predicted	0.226	elmmo
MIMAT0003199	rno-miR-381-3p	Siglec5	292843	ENSRNOG00000021474	NA	NA	NA	predicted	0.226	elmmo
MIMAT0003199	rno-miR-381-3p	Serpina7	81806	ENSRNOG00000011081	NA	NA	NA	predicted	0.226	elmmo
MIMAT0003199	rno-miR-381-3p	Ablim3	307395	ENSRNOG00000019365	NA	NA	NA	predicted	0.226	elmmo
MIMAT0003199	rno-miR-381-3p	Zkscan3	306977	ENSRNOG00000055000	NA	NA	NA	predicted	0.226	elmmo
MIMAT0003199	rno-miR-381-3p	Nptn	56064	ENSRNOG00000009029	NA	NA	NA	predicted	0.226	elmmo
MIMAT0003199	rno-miR-381-3p	Fbxo33	314157	ENSRNOG00000005285	NA	NA	NA	predicted	0.226	elmmo
MIMAT0003199	rno-miR-381-3p	Grpel2	688777	ENSRNOG00000042682	NA	NA	NA	predicted	0.226	elmmo
MIMAT0003199	rno-miR-381-3p	Ankrd17	289521	ENSRNOG00000002940	NA	NA	NA	predicted	0.226	elmmo
MIMAT0003199	rno-miR-381-3p	Ppp1r14d	259226	ENSRNOG00000012648	NA	NA	NA	predicted	0.226	elmmo
MIMAT0003199	rno-miR-381-3p	Cobl	305497	ENSRNOG00000004281	NA	NA	NA	predicted	0.226	elmmo
MIMAT0003199	rno-miR-381-3p	Esr2	25149	ENSRNOG00000005343	NA	NA	NA	predicted	0.226	elmmo
MIMAT0003199	rno-miR-381-3p	Rfx5	310659	ENSRNOG00000021012	NA	NA	NA	predicted	0.226	elmmo
MIMAT0003199	rno-miR-381-3p	Kdsr	360833	ENSRNOG00000002781	NA	NA	NA	predicted	0.226	elmmo
MIMAT0003199	rno-miR-381-3p	Mobp	25037	ENSRNOG00000018700	NA	NA	NA	predicted	0.226	elmmo
MIMAT0003199	rno-miR-381-3p	Trim5	308906	ENSRNOG00000017191	NA	NA	NA	predicted	0.226	elmmo
MIMAT0003199	rno-miR-381-3p	Hook1	313370	ENSRNOG00000026226	NA	NA	NA	predicted	0.226	elmmo
MIMAT0003199	rno-miR-381-3p	Smarca2	361745	ENSRNOG00000011931	NA	NA	NA	predicted	0.226	elmmo
MIMAT0003199	rno-miR-381-3p	Ercc2	308415	ENSRNOG00000017753	NA	NA	NA	predicted	0.226	elmmo
MIMAT0003199	rno-miR-381-3p	Dock8	499337	ENSRNOG00000015894	NA	NA	NA	predicted	0.22	elmmo
MIMAT0003199	rno-miR-381-3p	Kcnj6	25743	ENSRNOG00000001658	NA	NA	NA	predicted	0.214	elmmo
MIMAT0003199	rno-miR-381-3p	Gab1	361388	ENSRNOG00000017879	NA	NA	NA	predicted	0.21	elmmo
MIMAT0003199	rno-miR-381-3p	Tmem161b	309953	ENSRNOG00000032414	NA	NA	NA	predicted	0.21	elmmo
MIMAT0003199	rno-miR-381-3p	Slc7a1	25648	ENSRNOG00000000924	NA	NA	NA	predicted	0.21	elmmo
MIMAT0003199	rno-miR-381-3p	Zfp867	100125361	ENSRNOG00000022431	NA	NA	NA	predicted	0.209	elmmo
MIMAT0003199	rno-miR-381-3p	Hemgn	113882	ENSRNOG00000009436	NA	NA	NA	predicted	0.209	elmmo
MIMAT0003199	rno-miR-381-3p	Chsy1	292999	ENSRNOG00000012698	NA	NA	NA	predicted	0.209	elmmo
MIMAT0003199	rno-miR-381-3p	LOC100911867	100911867	ENSRNOG00000008190	NA	NA	NA	predicted	0.209	elmmo
MIMAT0003199	rno-miR-381-3p	Slc7a15	298873	ENSRNOG00000006119	NA	NA	NA	predicted	0.209	elmmo
MIMAT0003199	rno-miR-381-3p	Efcab1	301957	ENSRNOG00000050091	NA	NA	NA	predicted	0.209	elmmo
MIMAT0003199	rno-miR-381-3p	Helz2	296474	ENSRNOG00000013267	NA	NA	NA	predicted	0.209	elmmo
MIMAT0003199	rno-miR-381-3p	Gnptab	362865	ENSRNOG00000005228	NA	NA	NA	predicted	0.209	elmmo
MIMAT0003199	rno-miR-381-3p	Parp1	25591	ENSRNOG00000003084	NA	NA	NA	predicted	0.209	elmmo
MIMAT0003199	rno-miR-381-3p	Lzic	366507	ENSRNOG00000016200	NA	NA	NA	predicted	0.209	elmmo
MIMAT0003199	rno-miR-381-3p	Ptch2	366452	ENSRNOG00000057616	NA	NA	NA	predicted	0.209	elmmo
MIMAT0003199	rno-miR-381-3p	Slc10a2	102557217	ENSRNOG00000037753	NA	NA	NA	predicted	0.209	elmmo
MIMAT0003199	rno-miR-381-3p	Tmem33	59303	ENSRNOG00000002254	NA	NA	NA	predicted	0.209	elmmo
MIMAT0003199	rno-miR-381-3p	Fundc1	363442	ENSRNOG00000003470	NA	NA	NA	predicted	0.209	elmmo
MIMAT0003199	rno-miR-381-3p	Mefv	58923	ENSRNOG00000008134	NA	NA	NA	predicted	0.209	elmmo
MIMAT0003199	rno-miR-381-3p	Magee1	317232	ENSRNOG00000002660	NA	NA	NA	predicted	0.209	elmmo
MIMAT0003199	rno-miR-381-3p	Trpv5	116469	ENSRNOG00000015394	NA	NA	NA	predicted	0.209	elmmo
MIMAT0003199	rno-miR-381-3p	Ttc39b	298186	ENSRNOG00000042603	NA	NA	NA	predicted	0.209	elmmo
MIMAT0003199	rno-miR-381-3p	Rttn	291377	ENSRNOG00000038200	NA	NA	NA	predicted	0.209	elmmo
MIMAT0003199	rno-miR-381-3p	Gjb2	394266	ENSRNOG00000008855	NA	NA	NA	predicted	0.209	elmmo
MIMAT0003199	rno-miR-381-3p	Champ1	306647	ENSRNOG00000000112	NA	NA	NA	predicted	0.209	elmmo
MIMAT0003199	rno-miR-381-3p	Dusp22	361242	ENSRNOG00000056376	NA	NA	NA	predicted	0.209	elmmo
MIMAT0003199	rno-miR-381-3p	Ptgr2	299194	ENSRNOG00000038166	NA	NA	NA	predicted	0.209	elmmo
MIMAT0003199	rno-miR-381-3p	Olr1	140914	ENSRNOG00000056219	NA	NA	NA	predicted	0.209	elmmo
MIMAT0003199	rno-miR-381-3p	Rpe	501157	ENSRNOG00000038085	NA	NA	NA	predicted	0.209	elmmo
MIMAT0003199	rno-miR-381-3p	Rad51	100911267	ENSRNOG00000037302	NA	NA	NA	predicted	0.209	elmmo
MIMAT0003199	rno-miR-381-3p	Rgs14	114705	ENSRNOG00000015616	NA	NA	NA	predicted	0.209	elmmo
MIMAT0003199	rno-miR-381-3p	Reln	24718	ENSRNOG00000021441	NA	NA	NA	predicted	0.209	elmmo
MIMAT0003199	rno-miR-381-3p	Slc22a25	192273	ENSRNOG00000017964	NA	NA	NA	predicted	0.209	elmmo
MIMAT0003199	rno-miR-381-3p	Bmp8b	679119	ENSRNOG00000033209	NA	NA	NA	predicted	0.209	elmmo
MIMAT0003199	rno-miR-381-3p	Ubxn7	303878	ENSRNOG00000046969	NA	NA	NA	predicted	0.209	elmmo
MIMAT0003199	rno-miR-381-3p	Fam135b	315069	ENSRNOG00000005159	NA	NA	NA	predicted	0.209	elmmo
MIMAT0003199	rno-miR-381-3p	Fignl1	289777	ENSRNOG00000004440	NA	NA	NA	predicted	0.209	elmmo
MIMAT0003199	rno-miR-381-3p	Mboat2	313997	ENSRNOG00000061050	NA	NA	NA	predicted	0.209	elmmo
MIMAT0003199	rno-miR-381-3p	LOC100361547	29298	ENSRNOG00000021405	NA	NA	NA	predicted	0.209	elmmo
MIMAT0003199	rno-miR-381-3p	Isoc1	364879	ENSRNOG00000019711	NA	NA	NA	predicted	0.209	elmmo
MIMAT0003199	rno-miR-381-3p	Ppp1r9b	84686	ENSRNOG00000052113	NA	NA	NA	predicted	0.209	elmmo
MIMAT0003199	rno-miR-381-3p	Zfp763	314586	ENSRNOG00000004557	NA	NA	NA	predicted	0.209	elmmo
MIMAT0003199	rno-miR-381-3p	Tspan2	64521	ENSRNOG00000023338	NA	NA	NA	predicted	0.209	elmmo
MIMAT0003199	rno-miR-381-3p	Mob1a	690779	ENSRNOG00000042657	NA	NA	NA	predicted	0.209	elmmo
MIMAT0003199	rno-miR-381-3p	LOC100911267	499870	ENSRNOG00000037302	NA	NA	NA	predicted	0.209	elmmo
MIMAT0003199	rno-miR-381-3p	Sertm1	690333	ENSRNOG00000014046	NA	NA	NA	predicted	0.209	elmmo
MIMAT0003199	rno-miR-381-3p	Dcdc2	291130	ENSRNOG00000017511	NA	NA	NA	predicted	0.209	elmmo
MIMAT0003199	rno-miR-381-3p	Mcemp1	498128	ENSRNOG00000028259	NA	NA	NA	predicted	0.209	elmmo
MIMAT0003199	rno-miR-381-3p	Prss23	308807	ENSRNOG00000017307	NA	NA	NA	predicted	0.209	elmmo
MIMAT0003199	rno-miR-381-3p	RGD1562107	363205	ENSRNOG00000024755	NA	NA	NA	predicted	0.209	elmmo
MIMAT0003199	rno-miR-381-3p	Slc5a8	500820	ENSRNOG00000006367	NA	NA	NA	predicted	0.209	elmmo
MIMAT0003199	rno-miR-381-3p	Wdfy2	305956	ENSRNOG00000010042	NA	NA	NA	predicted	0.209	elmmo
MIMAT0003199	rno-miR-381-3p	Asb2	299266	ENSRNOG00000051619	NA	NA	NA	predicted	0.209	elmmo
MIMAT0003199	rno-miR-381-3p	Atp1b3	25390	ENSRNOG00000011501	NA	NA	NA	predicted	0.209	elmmo
MIMAT0003199	rno-miR-381-3p	Pcsk1	100911216	ENSRNOG00000011107	NA	NA	NA	predicted	0.209	elmmo
MIMAT0003199	rno-miR-381-3p	Pdpn	54320	ENSRNOG00000014961	NA	NA	NA	predicted	0.209	elmmo
MIMAT0003199	rno-miR-381-3p	Daam1	314212	ENSRNOG00000004345	NA	NA	NA	predicted	0.209	elmmo
MIMAT0003199	rno-miR-381-3p	Gpalpp1	298712	ENSRNOG00000001037	NA	NA	NA	predicted	0.209	elmmo
MIMAT0003199	rno-miR-381-3p	Rhob	64373	ENSRNOG00000021403	NA	NA	NA	predicted	0.209	elmmo
MIMAT0003199	rno-miR-381-3p	Acsl4	113976	ENSRNOG00000019180	NA	NA	NA	predicted	0.209	elmmo
MIMAT0003199	rno-miR-381-3p	Ccng2	29157	ENSRNOG00000002089	NA	NA	NA	predicted	0.209	elmmo
MIMAT0003199	rno-miR-381-3p	Thoc3	290519	ENSRNOG00000000104	NA	NA	NA	predicted	0.209	elmmo
MIMAT0003199	rno-miR-381-3p	Ube2c	296368	ENSRNOG00000015131	NA	NA	NA	predicted	0.209	elmmo
MIMAT0003199	rno-miR-381-3p	Zfp672	303165	ENSRNOG00000002713	NA	NA	NA	predicted	0.209	elmmo
MIMAT0003199	rno-miR-381-3p	LOC100911537	100911537	ENSRNOG00000042951	NA	NA	NA	predicted	0.209	elmmo
MIMAT0003199	rno-miR-381-3p	Grxcr1	100910415	ENSRNOG00000038891	NA	NA	NA	predicted	0.209	elmmo
MIMAT0003199	rno-miR-381-3p	Nkd2	308068	ENSRNOG00000016103	NA	NA	NA	predicted	0.209	elmmo
MIMAT0003199	rno-miR-381-3p	Heca	308624	ENSRNOG00000060972	NA	NA	NA	predicted	0.209	elmmo
MIMAT0003199	rno-miR-381-3p	LOC100911216	25204	ENSRNOG00000011107	NA	NA	NA	predicted	0.209	elmmo
MIMAT0003199	rno-miR-381-3p	Trib2	313974	ENSRNOG00000004110	NA	NA	NA	predicted	0.209	elmmo
MIMAT0003199	rno-miR-381-3p	Snx6	362738	ENSRNOG00000005249	NA	NA	NA	predicted	0.209	elmmo
MIMAT0003199	rno-miR-381-3p	Akirin2	297968	ENSRNOG00000008288	NA	NA	NA	predicted	0.209	elmmo
MIMAT0003199	rno-miR-381-3p	Mip	25480	ENSRNOG00000003132	NA	NA	NA	predicted	0.209	elmmo
MIMAT0003199	rno-miR-381-3p	Erlec1	289874	ENSRNOG00000007283	NA	NA	NA	predicted	0.209	elmmo
MIMAT0003199	rno-miR-381-3p	Sox8	302993	ENSRNOG00000018841	NA	NA	NA	predicted	0.209	elmmo
MIMAT0003199	rno-miR-381-3p	Spi1	366126	ENSRNOG00000012172	NA	NA	NA	predicted	0.209	elmmo
MIMAT0003199	rno-miR-381-3p	Ptpra	25167	ENSRNOG00000021223	NA	NA	NA	predicted	0.209	elmmo
MIMAT0003199	rno-miR-381-3p	Fsip1	296074	ENSRNOG00000005888	NA	NA	NA	predicted	0.209	elmmo
MIMAT0003199	rno-miR-381-3p	Slc12a3	54300	ENSRNOG00000057072	NA	NA	NA	predicted	0.209	elmmo
MIMAT0003199	rno-miR-381-3p	Serpine2	29366	ENSRNOG00000015461	NA	NA	NA	predicted	0.209	elmmo
MIMAT0003199	rno-miR-381-3p	Ubiad1	313706	ENSRNOG00000009575	NA	NA	NA	predicted	0.209	elmmo
MIMAT0003199	rno-miR-381-3p	Gpatch11	362685	ENSRNOG00000025317	NA	NA	NA	predicted	0.209	elmmo
MIMAT0003199	rno-miR-381-3p	Cdhr1	93662	ENSRNOG00000013330	NA	NA	NA	predicted	0.209	elmmo
MIMAT0003199	rno-miR-381-3p	LOC680039	680039	ENSRNOG00000027623	NA	NA	NA	predicted	0.209	elmmo
MIMAT0003199	rno-miR-381-3p	LOC100125362	100125362	ENSRNOG00000025463	NA	NA	NA	predicted	0.209	elmmo
MIMAT0003199	rno-miR-381-3p	Slc25a5	100909799	ENSRNOG00000039980	NA	NA	NA	predicted	0.209	elmmo
MIMAT0003199	rno-miR-381-3p	Cks2	498709	ENSRNOG00000014130	NA	NA	NA	predicted	0.209	elmmo
MIMAT0003199	rno-miR-381-3p	Susd4	289335	ENSRNOG00000003562	NA	NA	NA	predicted	0.209	elmmo
MIMAT0003199	rno-miR-381-3p	Slc27a3	295219	ENSRNOG00000015421	NA	NA	NA	predicted	0.209	elmmo
MIMAT0003199	rno-miR-381-3p	Cpsf2	299256	ENSRNOG00000005733	NA	NA	NA	predicted	0.209	elmmo
MIMAT0003199	rno-miR-381-3p	Cbln2	291388	ENSRNOG00000013654	NA	NA	NA	predicted	0.209	elmmo
MIMAT0003199	rno-miR-381-3p	Qrsl1	309911	ENSRNOG00000026049	NA	NA	NA	predicted	0.209	elmmo
MIMAT0003199	rno-miR-381-3p	Luzp1	79428	ENSRNOG00000022402	NA	NA	NA	predicted	0.209	elmmo
MIMAT0003199	rno-miR-381-3p	Nr0b1	58850	ENSRNOG00000003765	NA	NA	NA	predicted	0.209	elmmo
MIMAT0003199	rno-miR-381-3p	Bach2	313125	ENSRNOG00000006170	NA	NA	NA	predicted	0.209	elmmo
MIMAT0003199	rno-miR-381-3p	Six4	299138	ENSRNOG00000007250	NA	NA	NA	predicted	0.209	elmmo
MIMAT0003199	rno-miR-381-3p	Laptm4a	298875	ENSRNOG00000006865	NA	NA	NA	predicted	0.209	elmmo
MIMAT0003199	rno-miR-381-3p	Hoxc8	24460	ENSRNOG00000028619	NA	NA	NA	predicted	0.209	elmmo
MIMAT0003199	rno-miR-381-3p	RGD1565692	501653	ENSRNOG00000039576	NA	NA	NA	predicted	0.209	elmmo
MIMAT0003199	rno-miR-381-3p	Ddx19a	292022	ENSRNOG00000018033	NA	NA	NA	predicted	0.209	elmmo
MIMAT0003199	rno-miR-381-3p	Eid2	685691	ENSRNOG00000019310	NA	NA	NA	predicted	0.209	elmmo
MIMAT0003199	rno-miR-381-3p	Guf1	305317	ENSRNOG00000002207	NA	NA	NA	predicted	0.209	elmmo
MIMAT0003199	rno-miR-381-3p	Mthfs	300886	ENSRNOG00000013229	NA	NA	NA	predicted	0.209	elmmo
MIMAT0003199	rno-miR-381-3p	Hoxa4	100360577	ENSRNOG00000027365	NA	NA	NA	predicted	0.209	elmmo
MIMAT0003199	rno-miR-381-3p	Zfp260	53982	ENSRNOG00000020762	NA	NA	NA	predicted	0.209	elmmo
MIMAT0003199	rno-miR-381-3p	Megf9	313270	ENSRNOG00000005932	NA	NA	NA	predicted	0.209	elmmo
MIMAT0003199	rno-miR-381-3p	Ccne2	362485	ENSRNOG00000008055	NA	NA	NA	predicted	0.209	elmmo
MIMAT0003199	rno-miR-381-3p	Rimbp2	266780	ENSRNOG00000022893	NA	NA	NA	predicted	0.209	elmmo
MIMAT0003199	rno-miR-381-3p	RGD1565785	501570	ENSRNOG00000003748	NA	NA	NA	predicted	0.209	elmmo
MIMAT0003199	rno-miR-381-3p	Nap1l3	170914	ENSRNOG00000029087	NA	NA	NA	predicted	0.209	elmmo
MIMAT0003199	rno-miR-381-3p	March5	294079	ENSRNOG00000017396	NA	NA	NA	predicted	0.209	elmmo
MIMAT0003199	rno-miR-381-3p	Cacna1b	257648	ENSRNOG00000004560	NA	NA	NA	predicted	0.209	elmmo
MIMAT0003199	rno-miR-381-3p	Nudt22	293703	ENSRNOG00000021158	NA	NA	NA	predicted	0.209	elmmo
MIMAT0003199	rno-miR-381-3p	Suv39h1	302553	ENSRNOG00000039576	NA	NA	NA	predicted	0.209	elmmo
MIMAT0003199	rno-miR-381-3p	Slc35b3	306866	ENSRNOG00000016174	NA	NA	NA	predicted	0.209	elmmo
MIMAT0003199	rno-miR-381-3p	LOC100912525	100360577	ENSRNOG00000027365	NA	NA	NA	predicted	0.209	elmmo
MIMAT0003199	rno-miR-381-3p	Scnn1b	24767	ENSRNOG00000030981	NA	NA	NA	predicted	0.209	elmmo
MIMAT0003199	rno-miR-381-3p	Usp4	290864	ENSRNOG00000054863	NA	NA	NA	predicted	0.209	elmmo
MIMAT0003199	rno-miR-381-3p	Ctsl	25697	ENSRNOG00000018566	NA	NA	NA	predicted	0.209	elmmo
MIMAT0003199	rno-miR-381-3p	Oxsr1	316064	ENSRNOG00000013136	NA	NA	NA	predicted	0.209	elmmo
MIMAT0003199	rno-miR-381-3p	Tipinl1	100359731	ENSRNOG00000037221	NA	NA	NA	predicted	0.209	elmmo
MIMAT0003199	rno-miR-381-3p	Chp1	499969	ENSRNOG00000004742	NA	NA	NA	predicted	0.209	elmmo
MIMAT0003199	rno-miR-381-3p	Fuom	100911225	ENSRNOG00000018476	NA	NA	NA	predicted	0.209	elmmo
MIMAT0003199	rno-miR-381-3p	Utp18	303456	ENSRNOG00000002644	NA	NA	NA	predicted	0.209	elmmo
MIMAT0003199	rno-miR-381-3p	Adprh	25371	ENSRNOG00000027260	NA	NA	NA	predicted	0.209	elmmo
MIMAT0003199	rno-miR-381-3p	Cmtm4	498902	ENSRNOG00000011009	NA	NA	NA	predicted	0.209	elmmo
MIMAT0003199	rno-miR-381-3p	Usp26	302488	ENSRNOG00000029106	NA	NA	NA	predicted	0.209	elmmo
MIMAT0003199	rno-miR-381-3p	Ppp1r15b	304799	ENSRNOG00000028493	NA	NA	NA	predicted	0.209	elmmo
MIMAT0003199	rno-miR-381-3p	RGD1310553	301374	ENSRNOG00000016447	NA	NA	NA	predicted	0.209	elmmo
MIMAT0003199	rno-miR-381-3p	Eya3	313027	ENSRNOG00000010396	NA	NA	NA	predicted	0.209	elmmo
MIMAT0003199	rno-miR-381-3p	Itgbl1	498564	ENSRNOG00000004516	NA	NA	NA	predicted	0.209	elmmo
MIMAT0003199	rno-miR-381-3p	Tdp2	498749	ENSRNOG00000018246	NA	NA	NA	predicted	0.209	elmmo
MIMAT0003199	rno-miR-381-3p	Gas7	85246	ENSRNOG00000049361	NA	NA	NA	predicted	0.209	elmmo
MIMAT0003199	rno-miR-381-3p	Zbtb8b	500553	ENSRNOG00000026898	NA	NA	NA	predicted	0.209	elmmo
MIMAT0003199	rno-miR-381-3p	LOC100911225	293587	ENSRNOG00000018476	NA	NA	NA	predicted	0.209	elmmo
MIMAT0003199	rno-miR-381-3p	Slc15a4	246280	ENSRNOG00000000962	NA	NA	NA	predicted	0.209	elmmo
MIMAT0003199	rno-miR-381-3p	Fbxo11	301674	ENSRNOG00000016396	NA	NA	NA	predicted	0.209	elmmo
MIMAT0003199	rno-miR-381-3p	Gpr174	302373	ENSRNOG00000032970	NA	NA	NA	predicted	0.209	elmmo
MIMAT0003199	rno-miR-381-3p	LOC100362980	100362980	ENSRNOG00000047506	NA	NA	NA	predicted	0.209	elmmo
MIMAT0003199	rno-miR-381-3p	Mageh1	367767	ENSRNOG00000003178	NA	NA	NA	predicted	0.209	elmmo
MIMAT0003199	rno-miR-381-3p	Psma4	29671	ENSRNOG00000013493	NA	NA	NA	predicted	0.209	elmmo
MIMAT0003199	rno-miR-381-3p	Birc2	60371	ENSRNOG00000010602	NA	NA	NA	predicted	0.209	elmmo
MIMAT0003199	rno-miR-381-3p	Hoxc5	315341	ENSRNOG00000016598	NA	NA	NA	predicted	0.209	elmmo
MIMAT0003199	rno-miR-381-3p	Ehmt1	362078	ENSRNOG00000007242	NA	NA	NA	predicted	0.209	elmmo
MIMAT0003199	rno-miR-381-3p	March2	362849	ENSRNOG00000007769	NA	NA	NA	predicted	0.209	elmmo
MIMAT0003199	rno-miR-381-3p	Pbk	290326	ENSRNOG00000015308	NA	NA	NA	predicted	0.209	elmmo
MIMAT0003199	rno-miR-381-3p	Stmn2	84510	ENSRNOG00000011705	NA	NA	NA	predicted	0.209	elmmo
MIMAT0003199	rno-miR-381-3p	Lrif1	310775	ENSRNOG00000017784	NA	NA	NA	predicted	0.209	elmmo
MIMAT0003199	rno-miR-381-3p	Tjp1	292994	ENSRNOG00000011077	NA	NA	NA	predicted	0.209	elmmo
MIMAT0003199	rno-miR-381-3p	Pnpla7	246246	ENSRNOG00000008190	NA	NA	NA	predicted	0.209	elmmo
MIMAT0003199	rno-miR-381-3p	Cab39	301574	ENSRNOG00000017297	NA	NA	NA	predicted	0.209	elmmo
MIMAT0003199	rno-miR-381-3p	Scoc	364981	ENSRNOG00000003853	NA	NA	NA	predicted	0.209	elmmo
MIMAT0003199	rno-miR-381-3p	Nfatc3	361400	ENSRNOG00000054264	NA	NA	NA	predicted	0.209	elmmo
MIMAT0003199	rno-miR-381-3p	Has3	266805	ENSRNOG00000059362	NA	NA	NA	predicted	0.209	elmmo
MIMAT0003199	rno-miR-381-3p	Pim3	64534	ENSRNOG00000029698	NA	NA	NA	predicted	0.209	elmmo
MIMAT0003199	rno-miR-381-3p	Plcb1	24654	ENSRNOG00000004810	NA	NA	NA	predicted	0.209	elmmo
MIMAT0003199	rno-miR-381-3p	Pkia	114906	ENSRNOG00000012095	NA	NA	NA	predicted	0.209	elmmo
MIMAT0003199	rno-miR-381-3p	Galnt2	292090	ENSRNOG00000019143	NA	NA	NA	predicted	0.209	elmmo
MIMAT0003199	rno-miR-381-3p	Cxcl10	245920	ENSRNOG00000022256	NA	NA	NA	predicted	0.209	elmmo
MIMAT0003199	rno-miR-381-3p	Egln2	308457	ENSRNOG00000020947	NA	NA	NA	predicted	0.209	elmmo
MIMAT0003199	rno-miR-381-3p	Calhm2	294019	ENSRNOG00000020325	NA	NA	NA	predicted	0.209	elmmo
MIMAT0003199	rno-miR-381-3p	LOC691311	691311	ENSRNOG00000021364	NA	NA	NA	predicted	0.209	elmmo
MIMAT0003199	rno-miR-381-3p	Tnni1	29388	ENSRNOG00000009073	NA	NA	NA	predicted	0.209	elmmo
MIMAT0003199	rno-miR-381-3p	Polr3k	366277	ENSRNOG00000017843	NA	NA	NA	predicted	0.209	elmmo
MIMAT0003199	rno-miR-381-3p	Calu	64366	ENSRNOG00000006197	NA	NA	NA	predicted	0.209	elmmo
MIMAT0003199	rno-miR-381-3p	Iba57	100912081	ENSRNOG00000022725	NA	NA	NA	predicted	0.209	elmmo
MIMAT0003199	rno-miR-381-3p	Ccdc43	360637	ENSRNOG00000002748	NA	NA	NA	predicted	0.209	elmmo
MIMAT0003199	rno-miR-381-3p	Fbxo3	690634	ENSRNOG00000009549	NA	NA	NA	predicted	0.209	elmmo
MIMAT0003199	rno-miR-381-3p	Zfp37	115768	ENSRNOG00000046629	NA	NA	NA	predicted	0.209	elmmo
MIMAT0003199	rno-miR-381-3p	Slc44a2	363024	ENSRNOG00000031824	NA	NA	NA	predicted	0.209	elmmo
MIMAT0003199	rno-miR-381-3p	Med26	306328	ENSRNOG00000012270	NA	NA	NA	predicted	0.209	elmmo
MIMAT0003199	rno-miR-381-3p	Ptdss1	314553	ENSRNOG00000052289	NA	NA	NA	predicted	0.209	elmmo
MIMAT0003199	rno-miR-381-3p	Tubgcp5	308663	ENSRNOG00000011480	NA	NA	NA	predicted	0.209	elmmo
MIMAT0003199	rno-miR-381-3p	RGD1309534	363016	ENSRNOG00000010887	NA	NA	NA	predicted	0.209	elmmo
MIMAT0003199	rno-miR-381-3p	Tmem55a	362490	ENSRNOG00000006697	NA	NA	NA	predicted	0.209	elmmo
MIMAT0003199	rno-miR-381-3p	Ccdc169	499618	ENSRNOG00000038095	NA	NA	NA	predicted	0.209	elmmo
MIMAT0003199	rno-miR-381-3p	Cox11		ENSRNOG00000002458	NA	NA	NA	predicted	0.209	elmmo
MIMAT0003199	rno-miR-381-3p	Tank	252961	ENSRNOG00000008859	NA	NA	NA	predicted	0.209	elmmo
MIMAT0003199	rno-miR-381-3p	Slc35f2	300713	ENSRNOG00000009014	NA	NA	NA	predicted	0.209	elmmo
MIMAT0003199	rno-miR-381-3p	Fam210a	307343	ENSRNOG00000016740	NA	NA	NA	predicted	0.209	elmmo
MIMAT0003199	rno-miR-381-3p	Xrn1	100911537	ENSRNOG00000042951	NA	NA	NA	predicted	0.209	elmmo
MIMAT0003199	rno-miR-381-3p	Apobec1	25383	ENSRNOG00000015411	NA	NA	NA	predicted	0.209	elmmo
MIMAT0003199	rno-miR-381-3p	Slc4a11	311423	ENSRNOG00000021234	NA	NA	NA	predicted	0.209	elmmo
MIMAT0003199	rno-miR-381-3p	Dgkb	54248	ENSRNOG00000030771	NA	NA	NA	predicted	0.209	elmmo
MIMAT0003199	rno-miR-381-3p	Fam133b	501520	ENSRNOG00000009163	NA	NA	NA	predicted	0.209	elmmo
MIMAT0003199	rno-miR-381-3p	Prl8a7	64368	ENSRNOG00000016933	NA	NA	NA	predicted	0.209	elmmo
MIMAT0003199	rno-miR-381-3p	Cd8a	24930	ENSRNOG00000007178	NA	NA	NA	predicted	0.209	elmmo
MIMAT0003199	rno-miR-381-3p	Mageb18	317270	ENSRNOG00000038230	NA	NA	NA	predicted	0.209	elmmo
MIMAT0003199	rno-miR-381-3p	RGD1560958	499277	ENSRNOG00000026419	NA	NA	NA	predicted	0.209	elmmo
MIMAT0003199	rno-miR-381-3p	Smpd3	94338	ENSRNOG00000000257	NA	NA	NA	predicted	0.209	elmmo
MIMAT0003199	rno-miR-381-3p	Mcm8	296178	ENSRNOG00000021272	NA	NA	NA	predicted	0.209	elmmo
MIMAT0003199	rno-miR-381-3p	Prl8a5	286889	ENSRNOG00000016871	NA	NA	NA	predicted	0.209	elmmo
MIMAT0003199	rno-miR-381-3p	Pef1	297900	ENSRNOG00000013972	NA	NA	NA	predicted	0.209	elmmo
MIMAT0003199	rno-miR-381-3p	Coq10b	301416	ENSRNOG00000014456	NA	NA	NA	predicted	0.209	elmmo
MIMAT0003199	rno-miR-381-3p	Pdzd8	308000	ENSRNOG00000009460	NA	NA	NA	predicted	0.209	elmmo
MIMAT0003199	rno-miR-381-3p	Pafah1b2	64189	ENSRNOG00000057102	NA	NA	NA	predicted	0.209	elmmo
MIMAT0003199	rno-miR-381-3p	Slc12a4	29501	ENSRNOG00000019651	NA	NA	NA	predicted	0.209	elmmo
MIMAT0003199	rno-miR-381-3p	Naf1	306387	ENSRNOG00000026403	NA	NA	NA	predicted	0.209	elmmo
MIMAT0003199	rno-miR-381-3p	Ddah1	64157	ENSRNOG00000014613	NA	NA	NA	predicted	0.209	elmmo
MIMAT0003199	rno-miR-381-3p	Zdhhc15	317235	ENSRNOG00000002751	NA	NA	NA	predicted	0.209	elmmo
MIMAT0003199	rno-miR-381-3p	LOC498675	498675	ENSRNOG00000046155	NA	NA	NA	predicted	0.209	elmmo
MIMAT0003199	rno-miR-381-3p	Tph1	24848	ENSRNOG00000011672	NA	NA	NA	predicted	0.209	elmmo
MIMAT0003199	rno-miR-381-3p	Ankrd49	315434	ENSRNOG00000009233	NA	NA	NA	predicted	0.209	elmmo
MIMAT0003199	rno-miR-381-3p	Ube2k	289623	ENSRNOG00000027088	NA	NA	NA	predicted	0.209	elmmo
MIMAT0003199	rno-miR-381-3p	Prl8a9	171406	ENSRNOG00000024843	NA	NA	NA	predicted	0.209	elmmo
MIMAT0003199	rno-miR-381-3p	Myf5	299766	ENSRNOG00000004768	NA	NA	NA	predicted	0.209	elmmo
MIMAT0003199	rno-miR-381-3p	Paqr5	315741	ENSRNOG00000014164	NA	NA	NA	predicted	0.209	elmmo
MIMAT0003199	rno-miR-381-3p	Smad2	29357	ENSRNOG00000018140	NA	NA	NA	predicted	0.209	elmmo
MIMAT0003199	rno-miR-381-3p	Pqlc2	362642	ENSRNOG00000017706	NA	NA	NA	predicted	0.209	elmmo
MIMAT0003199	rno-miR-381-3p	RGD1562310	498188	ENSRNOG00000001123	NA	NA	NA	predicted	0.209	elmmo
MIMAT0003199	rno-miR-381-3p	Pcdh18	295027	ENSRNOG00000009949	NA	NA	NA	predicted	0.209	elmmo
MIMAT0003199	rno-miR-381-3p	Gpkow	679890	ENSRNOG00000022939	NA	NA	NA	predicted	0.209	elmmo
MIMAT0003199	rno-miR-381-3p	LOC100362620	498709	ENSRNOG00000014130	NA	NA	NA	predicted	0.209	elmmo
MIMAT0003199	rno-miR-381-3p	Adss	289276	ENSRNOG00000004481	NA	NA	NA	predicted	0.209	elmmo
MIMAT0003199	rno-miR-381-3p	G3bp1	171092	ENSRNOG00000013186	NA	NA	NA	predicted	0.209	elmmo
MIMAT0003199	rno-miR-381-3p	Efr3a	362923	ENSRNOG00000025528	NA	NA	NA	predicted	0.209	elmmo
MIMAT0003199	rno-miR-381-3p	Tm4sf1	295061	ENSRNOG00000015812	NA	NA	NA	predicted	0.209	elmmo
MIMAT0003199	rno-miR-381-3p	Lmtk2	304286	ENSRNOG00000025155	NA	NA	NA	predicted	0.209	elmmo
MIMAT0003199	rno-miR-381-3p	Dnm2	25751	ENSRNOG00000007649	NA	NA	NA	predicted	0.209	elmmo
MIMAT0003199	rno-miR-381-3p	Dmbx1	313512	ENSRNOG00000010835	NA	NA	NA	predicted	0.209	elmmo
MIMAT0003199	rno-miR-381-3p	Axin1	79257	ENSRNOG00000020414	NA	NA	NA	predicted	0.209	elmmo
MIMAT0003199	rno-miR-381-3p	Rab9b	367915	ENSRNOG00000047960	NA	NA	NA	predicted	0.209	elmmo
MIMAT0003199	rno-miR-381-3p	Slc35f1	502421	ENSRNOG00000000412	NA	NA	NA	predicted	0.209	elmmo
MIMAT0003199	rno-miR-381-3p	Fkbp6	288597	ENSRNOG00000001451	NA	NA	NA	predicted	0.209	elmmo
MIMAT0003199	rno-miR-381-3p	Carhsp1	260416	ENSRNOG00000002610	NA	NA	NA	predicted	0.209	elmmo
MIMAT0003199	rno-miR-381-3p	Ddx19b	292022	ENSRNOG00000018033	NA	NA	NA	predicted	0.209	elmmo
MIMAT0003199	rno-miR-381-3p	Slain2	305310	ENSRNOG00000002271	NA	NA	NA	predicted	0.209	elmmo
MIMAT0003199	rno-miR-381-3p	Chfr	288734	ENSRNOG00000037430	NA	NA	NA	predicted	0.209	elmmo
MIMAT0003199	rno-miR-381-3p	Tat	24813	ENSRNOG00000016348	NA	NA	NA	predicted	0.209	elmmo
MIMAT0003199	rno-miR-381-3p	Npl	304860	ENSRNOG00000002775	NA	NA	NA	predicted	0.209	elmmo
MIMAT0003199	rno-miR-381-3p	Dcaf10	313242	ENSRNOG00000011655	NA	NA	NA	predicted	0.209	elmmo
MIMAT0003199	rno-miR-381-3p	Fam58b	303321	ENSRNOG00000022582	NA	NA	NA	predicted	0.209	elmmo
MIMAT0003199	rno-miR-381-3p	Plekhf2	362484	ENSRNOG00000026662	NA	NA	NA	predicted	0.209	elmmo
MIMAT0003199	rno-miR-381-3p	Prkci	84006	ENSRNOG00000009652	NA	NA	NA	predicted	0.209	elmmo
MIMAT0003199	rno-miR-381-3p	Zfp26	367033	ENSRNOG00000025937	NA	NA	NA	predicted	0.209	elmmo
MIMAT0003199	rno-miR-381-3p	Abcb1a	170913	ENSRNOG00000008012	NA	NA	NA	predicted	0.209	elmmo
MIMAT0003199	rno-miR-381-3p	Ssr1	361233	ENSRNOG00000014165	NA	NA	NA	predicted	0.209	elmmo
MIMAT0003199	rno-miR-381-3p	Vps39	362199	ENSRNOG00000008316	NA	NA	NA	predicted	0.209	elmmo
MIMAT0003199	rno-miR-381-3p	Has2	25694	ENSRNOG00000004854	NA	NA	NA	predicted	0.209	elmmo
MIMAT0003199	rno-miR-381-3p	Clvs1	366311	ENSRNOG00000006919	NA	NA	NA	predicted	0.209	elmmo
MIMAT0003199	rno-miR-381-3p	Pabpc5	688518	ENSRNOG00000003354	NA	NA	NA	predicted	0.209	elmmo
MIMAT0003199	rno-miR-381-3p	Zfp266	367034	ENSRNOG00000034037	NA	NA	NA	predicted	0.209	elmmo
MIMAT0003199	rno-miR-381-3p	Lpar4	302378	ENSRNOG00000002428	NA	NA	NA	predicted	0.209	elmmo
MIMAT0003199	rno-miR-381-3p	Rnf170	364654	ENSRNOG00000045943	NA	NA	NA	predicted	0.209	elmmo
MIMAT0003199	rno-miR-381-3p	Tbc1d14	102549464	ENSRNOG00000006400	NA	NA	NA	predicted	0.209	elmmo
MIMAT0003199	rno-miR-381-3p	Cttnbp2	282587	ENSRNOG00000061845	NA	NA	NA	predicted	0.209	elmmo
MIMAT0003199	rno-miR-381-3p	Tmem68	312946	ENSRNOG00000008872	NA	NA	NA	predicted	0.209	elmmo
MIMAT0003199	rno-miR-381-3p	Cse1l	362273	ENSRNOG00000007665	NA	NA	NA	predicted	0.209	elmmo
MIMAT0003199	rno-miR-381-3p	Igf1	24482	ENSRNOG00000004517	NA	NA	NA	predicted	0.209	elmmo
MIMAT0003199	rno-miR-381-3p	RGD1561849	500393	ENSRNOG00000021663	NA	NA	NA	predicted	0.209	elmmo
MIMAT0003199	rno-miR-381-3p	Heph	117240	ENSRNOG00000012294	NA	NA	NA	predicted	0.209	elmmo
MIMAT0003199	rno-miR-381-3p	Olig3	293012	ENSRNOG00000012057	NA	NA	NA	predicted	0.209	elmmo
MIMAT0003199	rno-miR-381-3p	Hccs	317444	ENSRNOG00000025910	NA	NA	NA	predicted	0.209	elmmo
MIMAT0003199	rno-miR-381-3p	Tnpo2	304670	ENSRNOG00000003970	NA	NA	NA	predicted	0.209	elmmo
MIMAT0003199	rno-miR-381-3p	Chrm3	24260	ENSRNOG00000049410	NA	NA	NA	predicted	0.209	elmmo
MIMAT0003199	rno-miR-381-3p	Rexo1	314630	ENSRNOG00000017916	NA	NA	NA	predicted	0.209	elmmo
MIMAT0003199	rno-miR-381-3p	Tspan13	366602	ENSRNOG00000005046	NA	NA	NA	predicted	0.209	elmmo
MIMAT0003199	rno-miR-381-3p	Paqr4	302967	ENSRNOG00000003721	NA	NA	NA	predicted	0.209	elmmo
MIMAT0003199	rno-miR-381-3p	Mlc1	315215	ENSRNOG00000032871	NA	NA	NA	predicted	0.209	elmmo
MIMAT0003199	rno-miR-381-3p	Rab5b	288779	ENSRNOG00000006130	NA	NA	NA	predicted	0.209	elmmo
MIMAT0003199	rno-miR-381-3p	Tec	84492	ENSRNOG00000002278	NA	NA	NA	predicted	0.209	elmmo
MIMAT0003199	rno-miR-381-3p	LOC500034	500034	ENSRNOG00000007224	NA	NA	NA	predicted	0.209	elmmo
MIMAT0003199	rno-miR-381-3p	Tiprl	360869	ENSRNOG00000003048	NA	NA	NA	predicted	0.209	elmmo
MIMAT0003199	rno-miR-381-3p	Atad2	314993	ENSRNOG00000025604	NA	NA	NA	predicted	0.209	elmmo
MIMAT0003199	rno-miR-381-3p	Slc35d1	298280	ENSRNOG00000022967	NA	NA	NA	predicted	0.209	elmmo
MIMAT0003199	rno-miR-381-3p	Morc3	304074	ENSRNOG00000026236	NA	NA	NA	predicted	0.209	elmmo
MIMAT0003199	rno-miR-381-3p	Pih1d3	315915	ENSRNOG00000054900	NA	NA	NA	predicted	0.209	elmmo
MIMAT0003199	rno-miR-381-3p	Synj2bp	64531	ENSRNOG00000006399	NA	NA	NA	predicted	0.209	elmmo
MIMAT0003199	rno-miR-381-3p	Sft2d2	360868	ENSRNOG00000003038	NA	NA	NA	predicted	0.209	elmmo
MIMAT0003199	rno-miR-381-3p	Apln	58812	ENSRNOG00000003984	NA	NA	NA	predicted	0.209	elmmo
MIMAT0003199	rno-miR-381-3p	Vamp4	364033	ENSRNOG00000003071	NA	NA	NA	predicted	0.209	elmmo
MIMAT0003199	rno-miR-381-3p	Cdc42ep3	313838	ENSRNOG00000032136	NA	NA	NA	predicted	0.209	elmmo
MIMAT0003199	rno-miR-381-3p	Katnbl1	691543	ENSRNOG00000005814	NA	NA	NA	predicted	0.209	elmmo
MIMAT0003199	rno-miR-381-3p	Fam13b	291694	ENSRNOG00000020384	NA	NA	NA	predicted	0.209	elmmo
MIMAT0003199	rno-miR-381-3p	Ppp1r3b	192280	ENSRNOG00000011474	NA	NA	NA	predicted	0.209	elmmo
MIMAT0003199	rno-miR-381-3p	Ankib1	368062	ENSRNOG00000005502	NA	NA	NA	predicted	0.209	elmmo
MIMAT0003199	rno-miR-381-3p	Agrn	25592	ENSRNOG00000020205	NA	NA	NA	predicted	0.209	elmmo
MIMAT0003199	rno-miR-381-3p	Zbtb11	304010	ENSRNOG00000001613	NA	NA	NA	predicted	0.209	elmmo
MIMAT0003199	rno-miR-381-3p	Enpp6	306460	ENSRNOG00000009660	NA	NA	NA	predicted	0.209	elmmo
MIMAT0003199	rno-miR-381-3p	Cyp2c7	29298	ENSRNOG00000021405	NA	NA	NA	predicted	0.209	elmmo
MIMAT0003199	rno-miR-381-3p	Rnf186	690433	ENSRNOG00000017244	NA	NA	NA	predicted	0.209	elmmo
MIMAT0003199	rno-miR-381-3p	S100pbp	500551	ENSRNOG00000007099	NA	NA	NA	predicted	0.209	elmmo
MIMAT0003199	rno-miR-381-3p	Colca2	315652	ENSRNOG00000042165	NA	NA	NA	predicted	0.209	elmmo
MIMAT0003199	rno-miR-381-3p	Pcmtd2	311726	ENSRNOG00000017404	NA	NA	NA	predicted	0.209	elmmo
MIMAT0003199	rno-miR-381-3p	Git1	83709	ENSRNOG00000061270	NA	NA	NA	predicted	0.209	elmmo
MIMAT0003199	rno-miR-381-3p	Cipc	314330	ENSRNOG00000011111	NA	NA	NA	predicted	0.209	elmmo
MIMAT0003199	rno-miR-381-3p	Zmat3	64394	ENSRNOG00000010119	NA	NA	NA	predicted	0.209	elmmo
MIMAT0003199	rno-miR-381-3p	Cast	25403	ENSRNOG00000010286	NA	NA	NA	predicted	0.209	elmmo
MIMAT0003199	rno-miR-381-3p	Tspan6	302313	ENSRNOG00000003786	NA	NA	NA	predicted	0.209	elmmo
MIMAT0003199	rno-miR-381-3p	Psmd5	296651	ENSRNOG00000018809	NA	NA	NA	predicted	0.209	elmmo
MIMAT0003199	rno-miR-381-3p	Ddx10	300710	ENSRNOG00000012500	NA	NA	NA	predicted	0.209	elmmo
MIMAT0003199	rno-miR-381-3p	Ly6g6e	406866	ENSRNOG00000027157	NA	NA	NA	predicted	0.209	elmmo
MIMAT0003199	rno-miR-381-3p	Zfp219	305848	ENSRNOG00000011544	NA	NA	NA	predicted	0.209	elmmo
MIMAT0003199	rno-miR-381-3p	Abcd3	25270	ENSRNOG00000011929	NA	NA	NA	predicted	0.209	elmmo
MIMAT0003199	rno-miR-381-3p	Rgs17	308118	ENSRNOG00000018690	NA	NA	NA	predicted	0.209	elmmo
MIMAT0003199	rno-miR-381-3p	Kcnmb4	66016	ENSRNOG00000054458	NA	NA	NA	predicted	0.209	elmmo
MIMAT0003199	rno-miR-381-3p	Rab3gap2	289350	ENSRNOG00000002353	NA	NA	NA	predicted	0.209	elmmo
MIMAT0003199	rno-miR-381-3p	Wipf1	117538	ENSRNOG00000018406	NA	NA	NA	predicted	0.209	elmmo
MIMAT0003199	rno-miR-381-3p	Gca	295647	ENSRNOG00000007359	NA	NA	NA	predicted	0.209	elmmo
MIMAT0003199	rno-miR-381-3p	Wrnip1	282835	ENSRNOG00000017040	NA	NA	NA	predicted	0.209	elmmo
MIMAT0003199	rno-miR-381-3p	Adam19	303068	ENSRNOG00000042980	NA	NA	NA	predicted	0.209	elmmo
MIMAT0003199	rno-miR-381-3p	Ebag9	299864	ENSRNOG00000004220	NA	NA	NA	predicted	0.209	elmmo
MIMAT0003199	rno-miR-381-3p	Dazap2	300235	ENSRNOG00000004628	NA	NA	NA	predicted	0.209	elmmo
MIMAT0003199	rno-miR-381-3p	Ror2	306782	ENSRNOG00000053232	NA	NA	NA	predicted	0.209	elmmo
MIMAT0003199	rno-miR-381-3p	Klhl21	313743	ENSRNOG00000003334	NA	NA	NA	predicted	0.209	elmmo
MIMAT0003199	rno-miR-381-3p	Tnip2	305451	ENSRNOG00000013805	NA	NA	NA	predicted	0.209	elmmo
MIMAT0003199	rno-miR-381-3p	Gcnt1	64043	ENSRNOG00000050534	NA	NA	NA	predicted	0.209	elmmo
MIMAT0003199	rno-miR-381-3p	Mob1b	360920	ENSRNOG00000010996	NA	NA	NA	predicted	0.209	elmmo
MIMAT0003199	rno-miR-381-3p	Net1	307098	ENSRNOG00000017765	NA	NA	NA	predicted	0.209	elmmo
MIMAT0003199	rno-miR-381-3p	Rnf138	102551223	ENSRNOG00000015645	NA	NA	NA	predicted	0.209	elmmo
MIMAT0003199	rno-miR-381-3p	Mt4	498911	ENSRNOG00000019004	NA	NA	NA	predicted	0.209	elmmo
MIMAT0003199	rno-miR-381-3p	Whamm	293057	ENSRNOG00000028113	NA	NA	NA	predicted	0.209	elmmo
MIMAT0003199	rno-miR-381-3p	Fgfr1op2	362463	ENSRNOG00000001811	NA	NA	NA	predicted	0.209	elmmo
MIMAT0003199	rno-miR-381-3p	Cldn2	300920	ENSRNOG00000054495	NA	NA	NA	predicted	0.209	elmmo
MIMAT0003199	rno-miR-381-3p	Wdr89	314243	ENSRNOG00000021628	NA	NA	NA	predicted	0.209	elmmo
MIMAT0003199	rno-miR-381-3p	Arl4a	29308	ENSRNOG00000004282	NA	NA	NA	predicted	0.209	elmmo
MIMAT0003199	rno-miR-381-3p	Cep55	294074	ENSRNOG00000016377	NA	NA	NA	predicted	0.209	elmmo
MIMAT0003199	rno-miR-381-3p	Sigmar1	29336	ENSRNOG00000014604	NA	NA	NA	predicted	0.209	elmmo
MIMAT0003199	rno-miR-381-3p	Bhlhe40	79431	ENSRNOG00000007152	NA	NA	NA	predicted	0.209	elmmo
MIMAT0003199	rno-miR-381-3p	Aqr	366163	ENSRNOG00000008912	NA	NA	NA	predicted	0.209	elmmo
MIMAT0003199	rno-miR-381-3p	Slc35f5	288993	ENSRNOG00000003403	NA	NA	NA	predicted	0.209	elmmo
MIMAT0003199	rno-miR-381-3p	Giot1	171090	ENSRNOG00000008417	NA	NA	NA	predicted	0.209	elmmo
MIMAT0003199	rno-miR-381-3p	Nptx1	266777	ENSRNOG00000003741	NA	NA	NA	predicted	0.209	elmmo
MIMAT0003199	rno-miR-381-3p	Mageb4	317271	ENSRNOG00000022806	NA	NA	NA	predicted	0.209	elmmo
MIMAT0003199	rno-miR-381-3p	Eif1ax	302697	ENSRNOG00000005736	NA	NA	NA	predicted	0.209	elmmo
MIMAT0003199	rno-miR-381-3p	Ripk2	362491	ENSRNOG00000009389	NA	NA	NA	predicted	0.209	elmmo
MIMAT0003199	rno-miR-381-3p	Adcy6	25289	ENSRNOG00000054757	NA	NA	NA	predicted	0.209	elmmo
MIMAT0003199	rno-miR-381-3p	Smc2	362519	ENSRNOG00000022325	NA	NA	NA	predicted	0.209	elmmo
MIMAT0003199	rno-miR-381-3p	Smc4	295107	ENSRNOG00000010274	NA	NA	NA	predicted	0.209	elmmo
MIMAT0003199	rno-miR-381-3p	Ppm1b	24667	ENSRNOG00000030667	NA	NA	NA	predicted	0.209	elmmo
MIMAT0003199	rno-miR-381-3p	Psmc6	289990	ENSRNOG00000007203	NA	NA	NA	predicted	0.209	elmmo
MIMAT0003199	rno-miR-381-3p	Cdh17	117048	ENSRNOG00000015562	NA	NA	NA	predicted	0.209	elmmo
MIMAT0003199	rno-miR-381-3p	RGD1304982	289138	ENSRNOG00000005177	NA	NA	NA	predicted	0.209	elmmo
MIMAT0003199	rno-miR-381-3p	Cyb5r4	171015	ENSRNOG00000010024	NA	NA	NA	predicted	0.209	elmmo
MIMAT0003199	rno-miR-381-3p	Ostf1	259275	ENSRNOG00000012156	NA	NA	NA	predicted	0.209	elmmo
MIMAT0003199	rno-miR-381-3p	Galnt13	311039	ENSRNOG00000005335	NA	NA	NA	predicted	0.209	elmmo
MIMAT0003199	rno-miR-381-3p	Prdm1	309871	ENSRNOG00000000323	NA	NA	NA	predicted	0.209	elmmo
MIMAT0003199	rno-miR-381-3p	Cyyr1	304138	ENSRNOG00000001544	NA	NA	NA	predicted	0.209	elmmo
MIMAT0003199	rno-miR-381-3p	Pm20d2	313130	ENSRNOG00000007755	NA	NA	NA	predicted	0.209	elmmo
MIMAT0003199	rno-miR-381-3p	Rpia	362383	ENSRNOG00000005576	NA	NA	NA	predicted	0.209	elmmo
MIMAT0003199	rno-miR-381-3p	Zfp347	170902	ENSRNOG00000031216	NA	NA	NA	predicted	0.209	elmmo
MIMAT0003199	rno-miR-381-3p	Osr1	298878	ENSRNOG00000004210	NA	NA	NA	predicted	0.209	elmmo
MIMAT0003199	rno-miR-381-3p	Ermp1	373544	ENSRNOG00000010915	NA	NA	NA	predicted	0.209	elmmo
MIMAT0003199	rno-miR-381-3p	Hhip	291936	ENSRNOG00000018268	NA	NA	NA	predicted	0.209	elmmo
MIMAT0003199	rno-miR-381-3p	Pkp1	304822	ENSRNOG00000010076	NA	NA	NA	predicted	0.209	elmmo
MIMAT0003199	rno-miR-381-3p	Hcfc1	363519	ENSRNOG00000051948	NA	NA	NA	predicted	0.209	elmmo
MIMAT0003199	rno-miR-381-3p	Sertad3	499108	ENSRNOG00000037690	NA	NA	NA	predicted	0.209	elmmo
MIMAT0003199	rno-miR-381-3p	Myt1	362291	ENSRNOG00000017346	NA	NA	NA	predicted	0.209	elmmo
MIMAT0003199	rno-miR-381-3p	Trim59	365813	ENSRNOG00000010515	NA	NA	NA	predicted	0.209	elmmo
MIMAT0003199	rno-miR-381-3p	Dgcr8	287954	ENSRNOG00000001886	NA	NA	NA	predicted	0.209	elmmo
MIMAT0003199	rno-miR-381-3p	Rab31	246324	ENSRNOG00000042189	NA	NA	NA	predicted	0.209	elmmo
MIMAT0003199	rno-miR-381-3p	RGD1560455	302377	ENSRNOG00000037838	NA	NA	NA	predicted	0.209	elmmo
MIMAT0003199	rno-miR-381-3p	Utp20	314713	ENSRNOG00000005823	NA	NA	NA	predicted	0.209	elmmo
MIMAT0003199	rno-miR-381-3p	N4bp2l1	498131	ENSRNOG00000059322	NA	NA	NA	predicted	0.209	elmmo
MIMAT0003199	rno-miR-381-3p	Cxcl13	498335	ENSRNOG00000024899	NA	NA	NA	predicted	0.209	elmmo
MIMAT0003199	rno-miR-381-3p	Sult1d1	60393	ENSRNOG00000001960	NA	NA	NA	predicted	0.209	elmmo
MIMAT0003199	rno-miR-381-3p	Fads1	84575	ENSRNOG00000020480	NA	NA	NA	predicted	0.209	elmmo
MIMAT0003199	rno-miR-381-3p	Pkd2l2	291683	ENSRNOG00000025489	NA	NA	NA	predicted	0.176	elmmo
MIMAT0003199	rno-miR-381-3p	Csgalnact2	297554	ENSRNOG00000014713	NA	NA	NA	predicted	0.176	elmmo
MIMAT0003199	rno-miR-381-3p	Canx	29144	ENSRNOG00000003343	NA	NA	NA	predicted	0.176	elmmo
MIMAT0003199	rno-miR-381-3p	Nedd4	25489	ENSRNOG00000058898	NA	NA	NA	predicted	0.176	elmmo
MIMAT0003199	rno-miR-381-3p	Uhmk1	498754	ENSRNOG00000002941	NA	NA	NA	predicted	0.176	elmmo
MIMAT0003199	rno-miR-381-3p	Gimd1	362042	ENSRNOG00000042721	NA	NA	NA	predicted	0.176	elmmo
MIMAT0003199	rno-miR-381-3p	Gclm	29739	ENSRNOG00000013409	NA	NA	NA	predicted	0.176	elmmo
MIMAT0003199	rno-miR-381-3p	Ptgfr	25652	ENSRNOG00000046468	NA	NA	NA	predicted	0.176	elmmo
MIMAT0003199	rno-miR-381-3p	RGD1561897	246332	ENSRNOG00000002941	NA	NA	NA	predicted	0.176	elmmo
MIMAT0003199	rno-miR-381-3p	Dnajb14	499716	ENSRNOG00000060107	NA	NA	NA	predicted	0.176	elmmo
MIMAT0003199	rno-miR-381-3p	Scn7a	64155	ENSRNOG00000029342	NA	NA	NA	predicted	0.176	elmmo
MIMAT0003199	rno-miR-381-3p	Lypla1	25514	ENSRNOG00000008320	NA	NA	NA	predicted	0.176	elmmo
MIMAT0003199	rno-miR-381-3p	Gpc3	25236	ENSRNOG00000022684	NA	NA	NA	predicted	0.176	elmmo
MIMAT0003199	rno-miR-381-3p	Upp2	295620	ENSRNOG00000005341	NA	NA	NA	predicted	0.152	elmmo
MIMAT0003199	rno-miR-381-3p	Sim1	309888	ENSRNOG00000037600	NA	NA	NA	predicted	0.151	elmmo
MIMAT0003199	rno-miR-381-3p	Camlg	81715	ENSRNOG00000021911	NA	NA	NA	predicted	0.146	elmmo
MIMAT0003199	rno-miR-381-3p	Ccdc32	296081	ENSRNOG00000010472	NA	NA	NA	predicted	0.137	elmmo
MIMAT0003199	rno-miR-381-3p	Cacnb2	116600	ENSRNOG00000018378	NA	NA	NA	predicted	0.137	elmmo
MIMAT0003199	rno-miR-381-3p	Prkag3	301518	ENSRNOG00000017248	NA	NA	NA	predicted	0.13	elmmo
MIMAT0003199	rno-miR-381-3p	Rgcc	683573	ENSRNOG00000042960	NA	NA	NA	predicted	0.13	elmmo
MIMAT0003199	rno-miR-381-3p	Ticam2	364867	ENSRNOG00000042070	NA	NA	NA	predicted	0.13	elmmo
MIMAT0003199	rno-miR-381-3p	Il36rn	311783	ENSRNOG00000005751	NA	NA	NA	predicted	0.13	elmmo
MIMAT0003199	rno-miR-381-3p	Tek	89804	ENSRNOG00000008587	NA	NA	NA	predicted	0.13	elmmo
MIMAT0003199	rno-miR-381-3p	Tbx22	302369	ENSRNOG00000002346	NA	NA	NA	predicted	0.13	elmmo
MIMAT0003199	rno-miR-381-3p	Wdhd1	305827	ENSRNOG00000011167	NA	NA	NA	predicted	0.13	elmmo
MIMAT0003199	rno-miR-381-3p	Taf1c	361420	ENSRNOG00000015632	NA	NA	NA	predicted	0.13	elmmo
MIMAT0003199	rno-miR-381-3p	Bex4	501624	ENSRNOG00000028608	NA	NA	NA	predicted	0.13	elmmo
MIMAT0003199	rno-miR-381-3p	Smc5	293967	ENSRNOG00000030572	NA	NA	NA	predicted	0.13	elmmo
MIMAT0003199	rno-miR-381-3p	Aurka	261730	ENSRNOG00000004479	NA	NA	NA	predicted	0.117	elmmo
MIMAT0003199	rno-miR-381-3p	Snx18	310097	ENSRNOG00000010971	NA	NA	NA	predicted	0.117	elmmo
MIMAT0003199	rno-miR-381-3p	Dync2li1	298767	ENSRNOG00000005151	NA	NA	NA	predicted	0.117	elmmo
MIMAT0003199	rno-miR-381-3p	Usp44	314746	ENSRNOG00000005637	NA	NA	NA	predicted	0.117	elmmo
MIMAT0003199	rno-miR-381-3p	Elk4	304786	ENSRNOG00000007887	NA	NA	NA	predicted	0.117	elmmo
MIMAT0003199	rno-miR-381-3p	Lrp1b	311926	ENSRNOG00000030243	NA	NA	NA	predicted	0.117	elmmo
MIMAT0003199	rno-miR-381-3p	Vom2r53	286915	ENSRNOG00000007730	NA	NA	NA	predicted	19.1947	microcosm
MIMAT0003199	rno-miR-381-3p	LOC679290			NA	NA	NA	predicted	19.0791	microcosm
MIMAT0003199	rno-miR-381-3p	RGD1563680	499864	ENSRNOG00000004571	NA	NA	NA	predicted	18.9344	microcosm
MIMAT0003199	rno-miR-381-3p	Cd109_predicted			NA	NA	NA	predicted	18.7023	microcosm
MIMAT0003199	rno-miR-381-3p	Cog6	310411	ENSRNOG00000013660	NA	NA	NA	predicted	18.6165	microcosm
MIMAT0003199	rno-miR-381-3p	Ptch1_predicted			NA	NA	NA	predicted	18.5009	microcosm
MIMAT0003199	rno-miR-381-3p	Madd	94193	ENSRNOG00000012568	NA	NA	NA	predicted	18.3853	microcosm
MIMAT0003199	rno-miR-381-3p	Siae	363045	ENSRNOG00000031266	NA	NA	NA	predicted	18.3607	microcosm
MIMAT0003199	rno-miR-381-3p	Ppp2cb	24673	ENSRNOG00000015182	NA	NA	NA	predicted	18.2697	microcosm
MIMAT0003199	rno-miR-381-3p	Brd7_predicted			NA	NA	NA	predicted	18.2697	microcosm
MIMAT0003199	rno-miR-381-3p	Stx3	81802	ENSRNOG00000021013	NA	NA	NA	predicted	18.2552	microcosm
MIMAT0003199	rno-miR-381-3p	Idi1	89784	ENSRNOG00000016690	NA	NA	NA	predicted	18.154	microcosm
MIMAT0003199	rno-miR-381-3p	Phyhd1	296621	ENSRNOG00000016794	NA	NA	NA	predicted	18.0929	microcosm
MIMAT0003199	rno-miR-381-3p	LOC684773			NA	NA	NA	predicted	18.0608	microcosm
MIMAT0003199	rno-miR-381-3p	Jag2	29147	ENSRNOG00000013927	NA	NA	NA	predicted	18.0384	microcosm
MIMAT0003199	rno-miR-381-3p	Aqp6	29170	ENSRNOG00000053181	NA	NA	NA	predicted	18.0384	microcosm
MIMAT0003199	rno-miR-381-3p	Supt5h	308472	ENSRNOG00000032034	NA	NA	NA	predicted	18.0384	microcosm
MIMAT0003199	rno-miR-381-3p	Irak1bp1_predicted			NA	NA	NA	predicted	18.0384	microcosm
MIMAT0003199	rno-miR-381-3p	Abca2	79248	ENSRNOG00000014268	NA	NA	NA	predicted	18.0293	microcosm
MIMAT0003199	rno-miR-381-3p	Adamts17	293004	ENSRNOG00000037080	NA	NA	NA	predicted	18.0085	microcosm
MIMAT0003199	rno-miR-381-3p	Cyp2c11	29277	ENSRNOG00000052810	NA	NA	NA	predicted	17.9376	microcosm
MIMAT0003199	rno-miR-381-3p	Rbm45	266631	ENSRNOG00000010595	NA	NA	NA	predicted	17.9228	microcosm
MIMAT0003199	rno-miR-381-3p	Cab39l	290291	ENSRNOG00000011603	NA	NA	NA	predicted	17.9228	microcosm
MIMAT0003199	rno-miR-381-3p	Tctn2	689779	ENSRNOG00000001019	NA	NA	NA	predicted	17.9067	microcosm
MIMAT0003199	rno-miR-381-3p	Atp6v0a2	689779	ENSRNOG00000001019	NA	NA	NA	predicted	17.9067	microcosm
MIMAT0003199	rno-miR-381-3p	Rnf39	171387	ENSRNOG00000000781	NA	NA	NA	predicted	17.8836	microcosm
MIMAT0003199	rno-miR-381-3p	RGD1306739	361834	ENSRNOG00000000634	NA	NA	NA	predicted	17.8793	microcosm
MIMAT0003199	rno-miR-381-3p	Tmem14c	171432	ENSRNOG00000015437	NA	NA	NA	predicted	17.7984	microcosm
MIMAT0003199	rno-miR-381-3p	Ado	309732	ENSRNOG00000000639	NA	NA	NA	predicted	17.7916	microcosm
MIMAT0003199	rno-miR-381-3p	Akr1b7	116463	ENSRNOG00000009875	NA	NA	NA	predicted	17.7799	microcosm
MIMAT0003199	rno-miR-381-3p	Tmem158	117582	ENSRNOG00000004757	NA	NA	NA	predicted	17.6941	microcosm
MIMAT0003199	rno-miR-381-3p	Sbf1_predicted			NA	NA	NA	predicted	17.6926	microcosm
MIMAT0003199	rno-miR-381-3p	Mrgprb8			NA	NA	NA	predicted	17.6926	microcosm
MIMAT0003199	rno-miR-381-3p	Afap1l1	291565	ENSRNOG00000019403	NA	NA	NA	predicted	17.6926	microcosm
MIMAT0003199	rno-miR-381-3p	Gmppb	363145	ENSRNOG00000037229	NA	NA	NA	predicted	17.6915	microcosm
MIMAT0003199	rno-miR-381-3p	LOC363174			NA	NA	NA	predicted	17.6915	microcosm
MIMAT0003199	rno-miR-381-3p	Q4KM66_RAT			NA	NA	NA	predicted	17.6835	microcosm
MIMAT0003199	rno-miR-381-3p	Olr799	405144	ENSRNOG00000012214	NA	NA	NA	predicted	17.6811	microcosm
MIMAT0003199	rno-miR-381-3p	Olr799_predicted			NA	NA	NA	predicted	17.6781	microcosm
MIMAT0003199	rno-miR-381-3p	Maf1	315093	ENSRNOG00000013514	NA	NA	NA	predicted	17.621	microcosm
MIMAT0003199	rno-miR-381-3p	Lrrc3b	305705	ENSRNOG00000005857	NA	NA	NA	predicted	17.6051	microcosm
MIMAT0003199	rno-miR-381-3p	Slc22a1	24904	ENSRNOG00000016337	NA	NA	NA	predicted	17.5759	microcosm
MIMAT0003199	rno-miR-381-3p	Dnaja1	65028	ENSRNOG00000007029	NA	NA	NA	predicted	17.5759	microcosm
MIMAT0003199	rno-miR-381-3p	LOC100911589	84485	ENSRNOG00000019691	NA	NA	NA	predicted	17.5759	microcosm
MIMAT0003199	rno-miR-381-3p	Uqcrfs1	291103	ENSRNOG00000018281	NA	NA	NA	predicted	17.5759	microcosm
MIMAT0003199	rno-miR-381-3p	Depdc7	295971	ENSRNOG00000012262	NA	NA	NA	predicted	17.5759	microcosm
MIMAT0003199	rno-miR-381-3p	Slc10a3	501665	ENSRNOG00000060580	NA	NA	NA	predicted	17.5759	microcosm
MIMAT0003199	rno-miR-381-3p	Ccs	100911589	ENSRNOG00000019691	NA	NA	NA	predicted	17.5759	microcosm
MIMAT0003199	rno-miR-381-3p	LOC498265	498265	ENSRNOG00000059276	NA	NA	NA	predicted	17.5759	microcosm
MIMAT0003199	rno-miR-381-3p	LOC100364116	100364116	ENSRNOG00000030426	NA	NA	NA	predicted	17.5685	microcosm
MIMAT0003199	rno-miR-381-3p	Nsun3			NA	NA	NA	predicted	17.5259	microcosm
MIMAT0003199	rno-miR-381-3p	Skint8	689792	ENSRNOG00000037680	NA	NA	NA	predicted	17.5104	microcosm
MIMAT0003199	rno-miR-381-3p	Zfhx3	307829	ENSRNOG00000014452	NA	NA	NA	predicted	17.5018	microcosm
MIMAT0003199	rno-miR-381-3p	Psg19	24256	ENSRNOG00000038101	NA	NA	NA	predicted	17.4903	microcosm
MIMAT0003199	rno-miR-381-3p	LOC100360737	24256	ENSRNOG00000038101	NA	NA	NA	predicted	17.4903	microcosm
MIMAT0003199	rno-miR-381-3p	Dbr1	681234	ENSRNOG00000014588	NA	NA	NA	predicted	17.4819	microcosm
MIMAT0003199	rno-miR-381-3p	Olr414	56821	ENSRNOG00000033799	NA	NA	NA	predicted	17.4819	microcosm
MIMAT0003199	rno-miR-381-3p	RGD1560636_predicted			NA	NA	NA	predicted	17.4819	microcosm
MIMAT0003199	rno-miR-381-3p	Ccnd2	64033	ENSRNOG00000057710	NA	NA	NA	predicted	17.4806	microcosm
MIMAT0003199	rno-miR-381-3p	LOC100365826	100360437	ENSRNOG00000027762	NA	NA	NA	predicted	17.4744	microcosm
MIMAT0003199	rno-miR-381-3p	Ntel1			NA	NA	NA	predicted	17.4602	microcosm
MIMAT0003199	rno-miR-381-3p	RGD1559895_predicted			NA	NA	NA	predicted	17.4602	microcosm
MIMAT0003199	rno-miR-381-3p	Pld6	287366	ENSRNOG00000021657	NA	NA	NA	predicted	17.4298	microcosm
MIMAT0003199	rno-miR-381-3p	Igfbpl1	366366	ENSRNOG00000011320	NA	NA	NA	predicted	17.4025	microcosm
MIMAT0003199	rno-miR-381-3p	Vpreb1	303782	ENSRNOG00000043140	NA	NA	NA	predicted	17.393	microcosm
MIMAT0003199	rno-miR-381-3p	Saraf	290796	ENSRNOG00000012329	NA	NA	NA	predicted	17.3851	microcosm
MIMAT0003199	rno-miR-381-3p	Ka28			NA	NA	NA	predicted	17.3766	microcosm
MIMAT0003199	rno-miR-381-3p	Wdr5b	303907	ENSRNOG00000002253	NA	NA	NA	predicted	17.3766	microcosm
MIMAT0003199	rno-miR-381-3p	Bin2a	494244	ENSRNOG00000032461	NA	NA	NA	predicted	17.3766	microcosm
MIMAT0003199	rno-miR-381-3p	Crocc	313663	ENSRNOG00000008334	NA	NA	NA	predicted	17.3766	microcosm
MIMAT0003199	rno-miR-381-3p	RGD1560638_predicted			NA	NA	NA	predicted	17.3766	microcosm
MIMAT0003199	rno-miR-381-3p	Chd2_predicted			NA	NA	NA	predicted	17.3766	microcosm
MIMAT0003199	rno-miR-381-3p	Oprs1			NA	NA	NA	predicted	17.3537	microcosm
MIMAT0003199	rno-miR-381-3p	Ap2a1_predicted			NA	NA	NA	predicted	17.3446	microcosm
MIMAT0003199	rno-miR-381-3p	Nfil3	114519	ENSRNOG00000011668	NA	NA	NA	predicted	17.3446	microcosm
MIMAT0003199	rno-miR-381-3p	Ap2a1	308578	ENSRNOG00000026243	NA	NA	NA	predicted	17.3446	microcosm
MIMAT0003199	rno-miR-381-3p	Inha	24504	ENSRNOG00000020097	NA	NA	NA	predicted	17.3446	microcosm
MIMAT0003199	rno-miR-381-3p	LOC100359498	102549254	ENSRNOG00000038678	NA	NA	NA	predicted	17.3431	microcosm
MIMAT0003199	rno-miR-381-3p	LOC498400			NA	NA	NA	predicted	17.3238	microcosm
MIMAT0003199	rno-miR-381-3p	Olr563	404868	ENSRNOG00000037833	NA	NA	NA	predicted	17.3188	microcosm
MIMAT0003199	rno-miR-381-3p	Zfpm2_predicted			NA	NA	NA	predicted	17.3135	microcosm
MIMAT0003199	rno-miR-381-3p	Olr943_predicted			NA	NA	NA	predicted	17.3081	microcosm
MIMAT0003199	rno-miR-381-3p	Spna1			NA	NA	NA	predicted	17.2824	microcosm
MIMAT0003199	rno-miR-381-3p	RGD1565989_predicted			NA	NA	NA	predicted	17.2723	microcosm
MIMAT0003199	rno-miR-381-3p	RGD1308276			NA	NA	NA	predicted	17.2713	microcosm
MIMAT0003199	rno-miR-381-3p	Vpreb2	363830	ENSRNOG00000001839	NA	NA	NA	predicted	17.2713	microcosm
MIMAT0003199	rno-miR-381-3p	Slc19a1	29723	ENSRNOG00000001232	NA	NA	NA	predicted	17.2713	microcosm
MIMAT0003199	rno-miR-381-3p	Mir199a2		ENSRNOG00000029459	NA	NA	NA	predicted	17.2697	microcosm
MIMAT0003199	rno-miR-381-3p	Ddx3y	364073	ENSRNOG00000002501	NA	NA	NA	predicted	17.2533	microcosm
MIMAT0003199	rno-miR-381-3p	Idnk	498695	ENSRNOG00000019519	NA	NA	NA	predicted	17.2462	microcosm
MIMAT0003199	rno-miR-381-3p	Il12b	64546	ENSRNOG00000004380	NA	NA	NA	predicted	17.232	microcosm
MIMAT0003199	rno-miR-381-3p	Odz4_predicted			NA	NA	NA	predicted	17.229	microcosm
MIMAT0003199	rno-miR-381-3p	C4bpa	24235	ENSRNOG00000004062	NA	NA	NA	predicted	17.229	microcosm
MIMAT0003199	rno-miR-381-3p	Ctps2	619580	ENSRNOG00000004257	NA	NA	NA	predicted	17.2212	microcosm
MIMAT0003199	rno-miR-381-3p	Fads2	83512	ENSRNOG00000020440	NA	NA	NA	predicted	17.1738	microcosm
MIMAT0003199	rno-miR-381-3p	Ubr5	117060	ENSRNOG00000006816	NA	NA	NA	predicted	17.1724	microcosm
MIMAT0003199	rno-miR-381-3p	Clcn1	25688	ENSRNOG00000016917	NA	NA	NA	predicted	17.166	microcosm
MIMAT0003199	rno-miR-381-3p	2610020H08Rik			NA	NA	NA	predicted	17.1621	microcosm
MIMAT0003199	rno-miR-381-3p	Vps29	288666	ENSRNOG00000001274	NA	NA	NA	predicted	17.1522	microcosm
MIMAT0003199	rno-miR-381-3p	Eif4enif1	305468	ENSRNOG00000018475	NA	NA	NA	predicted	17.1453	microcosm
MIMAT0003199	rno-miR-381-3p	LOC679960		ENSRNOG00000003062	NA	NA	NA	predicted	17.1133	microcosm
MIMAT0003199	rno-miR-381-3p	Rps6kb2	361696	ENSRNOG00000021689	NA	NA	NA	predicted	17.1133	microcosm
MIMAT0003199	rno-miR-381-3p	Cdc2a			NA	NA	NA	predicted	17.1133	microcosm
MIMAT0003199	rno-miR-381-3p	Tmem120a	288591	ENSRNOG00000001441	NA	NA	NA	predicted	17.1133	microcosm
MIMAT0003199	rno-miR-381-3p	Pknox1	294322	ENSRNOG00000001184	NA	NA	NA	predicted	17.1133	microcosm
MIMAT0003199	rno-miR-381-3p	Slc28a3	140944	ENSRNOG00000018853	NA	NA	NA	predicted	17.0892	microcosm
MIMAT0003199	rno-miR-381-3p	Tmem81	498229	ENSRNOG00000028752	NA	NA	NA	predicted	17.0633	microcosm
MIMAT0003199	rno-miR-381-3p	Olr866	298475	ENSRNOG00000050435	NA	NA	NA	predicted	17.0607	microcosm
MIMAT0003199	rno-miR-381-3p	LOC100364634	494278	ENSRNOG00000049529	NA	NA	NA	predicted	17.0607	microcosm
MIMAT0003199	rno-miR-381-3p	Pifo	691223	ENSRNOG00000016842	NA	NA	NA	predicted	17.0607	microcosm
MIMAT0003199	rno-miR-381-3p	Vom1r52	494278	ENSRNOG00000049529	NA	NA	NA	predicted	17.0607	microcosm
MIMAT0003199	rno-miR-381-3p	Vwc2l	501160	ENSRNOG00000027400	NA	NA	NA	predicted	17.0607	microcosm
MIMAT0003199	rno-miR-381-3p	Aamp	301512	ENSRNOG00000014399	NA	NA	NA	predicted	17.0584	microcosm
MIMAT0003199	rno-miR-381-3p	Plin2	298199	ENSRNOG00000007060	NA	NA	NA	predicted	17.0583	microcosm
MIMAT0003199	rno-miR-381-3p	Asxl2	313922	ENSRNOG00000011908	NA	NA	NA	predicted	17.0575	microcosm
MIMAT0003199	rno-miR-381-3p	Cd19	365367	ENSRNOG00000018311	NA	NA	NA	predicted	17.0454	microcosm
MIMAT0003199	rno-miR-381-3p	Lphn1	65096	ENSRNOG00000029134	NA	NA	NA	predicted	17.0447	microcosm
MIMAT0003199	rno-miR-381-3p	Hdac2	84577	ENSRNOG00000000604	NA	NA	NA	predicted	17.0361	microcosm
MIMAT0003199	rno-miR-381-3p	Cd93		ENSRNOG00000024799	NA	NA	NA	predicted	17.0313	microcosm
MIMAT0003199	rno-miR-381-3p	Armcx1	501619	ENSRNOG00000046862	NA	NA	NA	predicted	17.0196	microcosm
MIMAT0003199	rno-miR-381-3p	Ddx19_v2			NA	NA	NA	predicted	17.0161	microcosm
MIMAT0003199	rno-miR-381-3p	Nol10	313981	ENSRNOG00000005344	NA	NA	NA	predicted	17.0106	microcosm
MIMAT0003199	rno-miR-381-3p	Tmem39b	362608	ENSRNOG00000023746	NA	NA	NA	predicted	17.01	microcosm
MIMAT0003199	rno-miR-381-3p	Rhox2	363439	ENSRNOG00000040013	NA	NA	NA	predicted	16.9977	microcosm
MIMAT0003199	rno-miR-381-3p	LOC298353			NA	NA	NA	predicted	16.9977	microcosm
MIMAT0003199	rno-miR-381-3p	Vps45	64516	ENSRNOG00000021173	NA	NA	NA	predicted	16.9977	microcosm
MIMAT0003199	rno-miR-381-3p	Noc4l	360828	ENSRNOG00000037478	NA	NA	NA	predicted	16.9977	microcosm
MIMAT0003199	rno-miR-381-3p	Slc6a11	79213	ENSRNOG00000005697	NA	NA	NA	predicted	16.9977	microcosm
MIMAT0003199	rno-miR-381-3p	RGD1306635_predicted			NA	NA	NA	predicted	16.9977	microcosm
MIMAT0003199	rno-miR-381-3p	Msx3	114504	ENSRNOG00000046776	NA	NA	NA	predicted	16.9785	microcosm
MIMAT0003199	rno-miR-381-3p	P2rx4	29659	ENSRNOG00000001300	NA	NA	NA	predicted	16.9784	microcosm
MIMAT0003199	rno-miR-381-3p	Olr94	405908	ENSRNOG00000036811	NA	NA	NA	predicted	16.9715	microcosm
MIMAT0003199	rno-miR-381-3p	Gmeb2	83635	ENSRNOG00000013339	NA	NA	NA	predicted	16.9684	microcosm
MIMAT0003199	rno-miR-381-3p	LOC686753			NA	NA	NA	predicted	16.965	microcosm
MIMAT0003199	rno-miR-381-3p	Olr481	404889	ENSRNOG00000031051	NA	NA	NA	predicted	16.9615	microcosm
MIMAT0003199	rno-miR-381-3p	Cd320	362851	ENSRNOG00000006901	NA	NA	NA	predicted	16.9564	microcosm
MIMAT0003199	rno-miR-381-3p	Pcdhb5	291654	ENSRNOG00000020084	NA	NA	NA	predicted	16.9554	microcosm
MIMAT0003199	rno-miR-381-3p	Psmg4	689623	ENSRNOG00000039265	NA	NA	NA	predicted	16.9554	microcosm
MIMAT0003199	rno-miR-381-3p	Nsun4	298426	ENSRNOG00000046192	NA	NA	NA	predicted	16.9554	microcosm
MIMAT0003199	rno-miR-381-3p	Efr3b	313928	ENSRNOG00000012950	NA	NA	NA	predicted	16.9554	microcosm
MIMAT0003199	rno-miR-381-3p	Colec10	299928	ENSRNOG00000008591	NA	NA	NA	predicted	16.9554	microcosm
MIMAT0003199	rno-miR-381-3p	Prdm2	313678	ENSRNOG00000033522	NA	NA	NA	predicted	16.9554	microcosm
MIMAT0003199	rno-miR-381-3p	LOC308956			NA	NA	NA	predicted	16.9554	microcosm
MIMAT0003199	rno-miR-381-3p	Guk1	303179	ENSRNOG00000002928	NA	NA	NA	predicted	16.9554	microcosm
MIMAT0003199	rno-miR-381-3p	Ppp3ca	24674	ENSRNOG00000009882	NA	NA	NA	predicted	16.9507	microcosm
MIMAT0003199	rno-miR-381-3p	P4ha2	360526	ENSRNOG00000033663	NA	NA	NA	predicted	16.947	microcosm
MIMAT0003199	rno-miR-381-3p	Plscr3	360549	ENSRNOG00000027914	NA	NA	NA	predicted	16.9255	microcosm
MIMAT0003199	rno-miR-381-3p	Slc35a5	498081	ENSRNOG00000002069	NA	NA	NA	predicted	16.9255	microcosm
MIMAT0003199	rno-miR-381-3p	Tenc1	315326	ENSRNOG00000010588	NA	NA	NA	predicted	16.9219	microcosm
MIMAT0003199	rno-miR-381-3p	Mettl10	361664	ENSRNOG00000017137	NA	NA	NA	predicted	16.9201	microcosm
MIMAT0003199	rno-miR-381-3p	Phf23	360550	ENSRNOG00000017657	NA	NA	NA	predicted	16.9074	microcosm
MIMAT0003199	rno-miR-381-3p	Acadm	24158	ENSRNOG00000009845	NA	NA	NA	predicted	16.8839	microcosm
MIMAT0003199	rno-miR-381-3p	Lalba	24528	ENSRNOG00000010811	NA	NA	NA	predicted	16.8821	microcosm
MIMAT0003199	rno-miR-381-3p	Cenpl	289150	ENSRNOG00000038789	NA	NA	NA	predicted	16.8821	microcosm
MIMAT0003199	rno-miR-381-3p	MGC94335	301418	ENSRNOG00000015983	NA	NA	NA	predicted	16.8821	microcosm
MIMAT0003199	rno-miR-381-3p	Cox6a1	25282	ENSRNOG00000001170	NA	NA	NA	predicted	16.8821	microcosm
MIMAT0003199	rno-miR-381-3p	Nup98	81738	ENSRNOG00000020347	NA	NA	NA	predicted	16.8821	microcosm
MIMAT0003199	rno-miR-381-3p	Unc13b	64830	ENSRNOG00000008237	NA	NA	NA	predicted	16.8821	microcosm
MIMAT0003199	rno-miR-381-3p	Prlhr	246075	ENSRNOG00000009922	NA	NA	NA	predicted	16.8821	microcosm
MIMAT0003199	rno-miR-381-3p	Uimc1	290997	ENSRNOG00000016891	NA	NA	NA	predicted	16.8821	microcosm
MIMAT0003199	rno-miR-381-3p	Cnot1	291841	ENSRNOG00000012271	NA	NA	NA	predicted	16.8821	microcosm
MIMAT0003199	rno-miR-381-3p	Cldn7	65132	ENSRNOG00000017325	NA	NA	NA	predicted	16.8821	microcosm
MIMAT0003199	rno-miR-381-3p	RGD1561386_predicted			NA	NA	NA	predicted	16.8806	microcosm
MIMAT0003199	rno-miR-381-3p	Tgfb2	81809	ENSRNOG00000002418	NA	NA	NA	predicted	16.8803	microcosm
MIMAT0003199	rno-miR-381-3p	Q5XHY1_RAT			NA	NA	NA	predicted	16.8779	microcosm
MIMAT0003199	rno-miR-381-3p	Nox3	292279	ENSRNOG00000016490	NA	NA	NA	predicted	16.8753	microcosm
MIMAT0003199	rno-miR-381-3p	RGD1311345	361201	ENSRNOG00000019232	NA	NA	NA	predicted	16.8705	microcosm
MIMAT0003199	rno-miR-381-3p	Aass		ENSRNOG00000039494	NA	NA	NA	predicted	16.8655	microcosm
MIMAT0003199	rno-miR-381-3p	Zfp238	64619	ENSRNOG00000004423	NA	NA	NA	predicted	16.8627	microcosm
MIMAT0003199	rno-miR-381-3p	Defb51	641620	ENSRNOG00000038130	NA	NA	NA	predicted	16.8627	microcosm
MIMAT0003199	rno-miR-381-3p	Bag4	361167	ENSRNOG00000042560	NA	NA	NA	predicted	16.8526	microcosm
MIMAT0003199	rno-miR-381-3p	Zpld1	363768	ENSRNOG00000039517	NA	NA	NA	predicted	16.8501	microcosm
MIMAT0003199	rno-miR-381-3p	Rpl37	100360781	ENSRNOG00000012538	NA	NA	NA	predicted	16.8501	microcosm
MIMAT0003199	rno-miR-381-3p	Olr1692	405189	ENSRNOG00000032716	NA	NA	NA	predicted	16.8501	microcosm
MIMAT0003199	rno-miR-381-3p	RT1-M6-1	414785	ENSRNOG00000022107	NA	NA	NA	predicted	16.8501	microcosm
MIMAT0003199	rno-miR-381-3p	RGD1310837			NA	NA	NA	predicted	16.8501	microcosm
MIMAT0003199	rno-miR-381-3p	RT1-M4	414785	ENSRNOG00000022107	NA	NA	NA	predicted	16.8501	microcosm
MIMAT0003199	rno-miR-381-3p	Fmnl2	499797	ENSRNOG00000004617	NA	NA	NA	predicted	16.8501	microcosm
MIMAT0003199	rno-miR-381-3p	Sdf2l1	680945	ENSRNOG00000001859	NA	NA	NA	predicted	16.8501	microcosm
MIMAT0003199	rno-miR-381-3p	Prps1	314140	ENSRNOG00000031938	NA	NA	NA	predicted	16.8333	microcosm
MIMAT0003199	rno-miR-381-3p	Maddm1Mcwi			NA	NA	NA	predicted	16.8197	microcosm
MIMAT0003199	rno-miR-381-3p	Pcm1	81740	ENSRNOG00000010155	NA	NA	NA	predicted	16.8091	microcosm
MIMAT0003199	rno-miR-381-3p	Pqlc1	361352	ENSRNOG00000059215	NA	NA	NA	predicted	16.7994	microcosm
MIMAT0003199	rno-miR-381-3p	Acad9	294973	ENSRNOG00000014178	NA	NA	NA	predicted	16.7825	microcosm
MIMAT0003199	rno-miR-381-3p	Vom2r17	690691	ENSRNOG00000049871	NA	NA	NA	predicted	16.7802	microcosm
MIMAT0003199	rno-miR-381-3p	Vom2r80	682419	ENSRNOG00000049871	NA	NA	NA	predicted	16.7802	microcosm
MIMAT0003199	rno-miR-381-3p	Vom2r16	690691	ENSRNOG00000049871	NA	NA	NA	predicted	16.7802	microcosm
MIMAT0003199	rno-miR-381-3p	LOC682419	690691	ENSRNOG00000049871	NA	NA	NA	predicted	16.7802	microcosm
MIMAT0003199	rno-miR-381-3p	Palld	100360205	ENSRNOG00000010107	NA	NA	NA	predicted	16.7727	microcosm
MIMAT0003199	rno-miR-381-3p	Taar8a	319104	ENSRNOG00000030414	NA	NA	NA	predicted	16.7702	microcosm
MIMAT0003199	rno-miR-381-3p	LOC100361993	100361993	ENSRNOG00000022144	NA	NA	NA	predicted	16.7702	microcosm
MIMAT0003199	rno-miR-381-3p	RGD1560343_predicted			NA	NA	NA	predicted	16.7702	microcosm
MIMAT0003199	rno-miR-381-3p	Gpn3	360810	ENSRNOG00000001278	NA	NA	NA	predicted	16.7665	microcosm
MIMAT0003199	rno-miR-381-3p	RGD1565498	500843	ENSRNOG00000028782	NA	NA	NA	predicted	16.7665	microcosm
MIMAT0003199	rno-miR-381-3p	LOC689031	100359700	ENSRNOG00000047990	NA	NA	NA	predicted	16.7665	microcosm
MIMAT0003199	rno-miR-381-3p	Cntrob	102555947	ENSRNOG00000008270	NA	NA	NA	predicted	16.754	microcosm
MIMAT0003199	rno-miR-381-3p	Cntrob_predicted			NA	NA	NA	predicted	16.754	microcosm
MIMAT0003199	rno-miR-381-3p	Ifitm10	293632	ENSRNOG00000020164	NA	NA	NA	predicted	16.7521	microcosm
MIMAT0003199	rno-miR-381-3p	Utrn	25600	ENSRNOG00000011058	NA	NA	NA	predicted	16.7447	microcosm
MIMAT0003199	rno-miR-381-3p	B3galt6	298690	ENSRNOG00000019979	NA	NA	NA	predicted	16.7447	microcosm
MIMAT0003199	rno-miR-381-3p	Tlk2_predicted			NA	NA	NA	predicted	16.7325	microcosm
MIMAT0003199	rno-miR-381-3p	LOC679478			NA	NA	NA	predicted	16.7219	microcosm
MIMAT0003199	rno-miR-381-3p	Actl9b	292516	ENSRNOG00000026033	NA	NA	NA	predicted	16.7218	microcosm
MIMAT0003199	rno-miR-381-3p	Ankhd1	100529260	ENSRNOG00000030247	NA	NA	NA	predicted	16.7139	microcosm
MIMAT0003199	rno-miR-381-3p	Fam65a	291974	ENSRNOG00000017604	NA	NA	NA	predicted	16.7055	microcosm
MIMAT0003199	rno-miR-381-3p	Plac1	317316	ENSRNOG00000002379	NA	NA	NA	predicted	16.6908	microcosm
MIMAT0003199	rno-miR-381-3p	LOC100909581		ENSRNOG00000037945	NA	NA	NA	predicted	16.6906	microcosm
MIMAT0003199	rno-miR-381-3p	Lmnb2	299625	ENSRNOG00000025742	NA	NA	NA	predicted	16.6851	microcosm
MIMAT0003199	rno-miR-381-3p	RGD1563955_predicted			NA	NA	NA	predicted	16.6775	microcosm
MIMAT0003199	rno-miR-381-3p	LOC682851			NA	NA	NA	predicted	16.6763	microcosm
MIMAT0003199	rno-miR-381-3p	Tpi1	500959	ENSRNOG00000015290	NA	NA	NA	predicted	16.6751	microcosm
MIMAT0003199	rno-miR-381-3p	Faxc	366333	ENSRNOG00000010106	NA	NA	NA	predicted	16.6751	microcosm
MIMAT0003199	rno-miR-381-3p	Triml2	290766	ENSRNOG00000028299	NA	NA	NA	predicted	16.6733	microcosm
MIMAT0003199	rno-miR-381-3p	LOC691984	691984	ENSRNOG00000046660	NA	NA	NA	predicted	16.6672	microcosm
MIMAT0003199	rno-miR-381-3p	Olr1320	300621	ENSRNOG00000051018	NA	NA	NA	predicted	16.6587	microcosm
MIMAT0003199	rno-miR-381-3p	Ap4s1	366618	ENSRNOG00000005765	NA	NA	NA	predicted	16.6587	microcosm
MIMAT0003199	rno-miR-381-3p	Ube2l6	295704	ENSRNOG00000030467	NA	NA	NA	predicted	16.6585	microcosm
MIMAT0003199	rno-miR-381-3p	Grcc10	100911713	ENSRNOG00000025810	NA	NA	NA	predicted	16.6508	microcosm
MIMAT0003199	rno-miR-381-3p	LOC100911713	100362005	ENSRNOG00000025810	NA	NA	NA	predicted	16.6508	microcosm
MIMAT0003199	rno-miR-381-3p	Lamtor4	360776	ENSRNOG00000027028	NA	NA	NA	predicted	16.6508	microcosm
MIMAT0003199	rno-miR-381-3p	Hsp110			NA	NA	NA	predicted	16.6508	microcosm
MIMAT0003199	rno-miR-381-3p	Rps16	316048	ENSRNOG00000019578	NA	NA	NA	predicted	16.6508	microcosm
MIMAT0003199	rno-miR-381-3p	Wdr46	309628	ENSRNOG00000031171	NA	NA	NA	predicted	16.6508	microcosm
MIMAT0003199	rno-miR-381-3p	Dtx4	293774	ENSRNOG00000021086	NA	NA	NA	predicted	16.6508	microcosm
MIMAT0003199	rno-miR-381-3p	Prpf8	287530	ENSRNOG00000003495	NA	NA	NA	predicted	16.6508	microcosm
MIMAT0003199	rno-miR-381-3p	Olr1729_predicted			NA	NA	NA	predicted	16.6479	microcosm
MIMAT0003199	rno-miR-381-3p	Btrc	361765	ENSRNOG00000016280	NA	NA	NA	predicted	16.6468	microcosm
MIMAT0003199	rno-miR-381-3p	LOC367195	367195	ENSRNOG00000031912	NA	NA	NA	predicted	16.6394	microcosm
MIMAT0003199	rno-miR-381-3p	LOC367153			NA	NA	NA	predicted	16.6394	microcosm
MIMAT0003199	rno-miR-381-3p	Olr1558	404978	ENSRNOG00000047976	NA	NA	NA	predicted	16.6394	microcosm
MIMAT0003199	rno-miR-381-3p	LOC313749			NA	NA	NA	predicted	16.6394	microcosm
MIMAT0003199	rno-miR-381-3p	Cep70	367153	ENSRNOG00000022845	NA	NA	NA	predicted	16.6394	microcosm
MIMAT0003199	rno-miR-381-3p	Slc12a7	308069	ENSRNOG00000016372	NA	NA	NA	predicted	16.6394	microcosm
MIMAT0003199	rno-miR-381-3p	Gmfb	81661	ENSRNOG00000047250	NA	NA	NA	predicted	16.6394	microcosm
MIMAT0003199	rno-miR-381-3p	Rc3h1		ENSRNOG00000002750	NA	NA	NA	predicted	16.6394	microcosm
MIMAT0003199	rno-miR-381-3p	Gpr151	307475	ENSRNOG00000027103	NA	NA	NA	predicted	16.6394	microcosm
MIMAT0003199	rno-miR-381-3p	Zfp42l		ENSRNOG00000033956	NA	NA	NA	predicted	16.6372	microcosm
MIMAT0003199	rno-miR-381-3p	Dis3l2	367307	ENSRNOG00000018931	NA	NA	NA	predicted	16.6358	microcosm
MIMAT0003199	rno-miR-381-3p	LOC100361476		ENSRNOG00000016336	NA	NA	NA	predicted	16.6213	microcosm
MIMAT0003199	rno-miR-381-3p	RGD1565415	500123	ENSRNOG00000033274	NA	NA	NA	predicted	16.6186	microcosm
MIMAT0003199	rno-miR-381-3p	Csf3	25610	ENSRNOG00000008525	NA	NA	NA	predicted	16.6159	microcosm
MIMAT0003199	rno-miR-381-3p	RGD1560908_predicted			NA	NA	NA	predicted	16.6107	microcosm
MIMAT0003199	rno-miR-381-3p	Nme7	171566	ENSRNOG00000002898	NA	NA	NA	predicted	16.606	microcosm
MIMAT0003199	rno-miR-381-3p	Shoc2	309548	ENSRNOG00000015339	NA	NA	NA	predicted	16.6055	microcosm
MIMAT0003199	rno-miR-381-3p	Mical3	362427	ENSRNOG00000027841	NA	NA	NA	predicted	16.6021	microcosm
MIMAT0003199	rno-miR-381-3p	Q3UNI0_MOUSE			NA	NA	NA	predicted	16.5992	microcosm
MIMAT0003199	rno-miR-381-3p	Il18bp	84388	ENSRNOG00000020150	NA	NA	NA	predicted	16.5977	microcosm
MIMAT0003199	rno-miR-381-3p	Defb40	641637	ENSRNOG00000033538	NA	NA	NA	predicted	16.5908	microcosm
MIMAT0003199	rno-miR-381-3p	RGD1310230			NA	NA	NA	predicted	16.5873	microcosm
MIMAT0003199	rno-miR-381-3p	Pcdh7	360942	ENSRNOG00000012367	NA	NA	NA	predicted	16.5757	microcosm
MIMAT0003199	rno-miR-381-3p	Rspo4	499918	ENSRNOG00000009662	NA	NA	NA	predicted	16.5757	microcosm
MIMAT0003199	rno-miR-381-3p	LOC100360417	100360417	ENSRNOG00000043377	NA	NA	NA	predicted	16.5752	microcosm
MIMAT0003199	rno-miR-381-3p	Mtm1	288762	ENSRNOG00000002516	NA	NA	NA	predicted	16.5752	microcosm
MIMAT0003199	rno-miR-381-3p	Fdps	100360417	ENSRNOG00000043377	NA	NA	NA	predicted	16.5752	microcosm
MIMAT0003199	rno-miR-381-3p	RGD1563191_predicted			NA	NA	NA	predicted	16.5743	microcosm
MIMAT0003199	rno-miR-381-3p	Arfgap1	246310	ENSRNOG00000043150	NA	NA	NA	predicted	16.5668	microcosm
MIMAT0003199	rno-miR-381-3p	Tas2r119	78979	ENSRNOG00000011963	NA	NA	NA	predicted	16.5662	microcosm
MIMAT0003199	rno-miR-381-3p	Nkx2-1	25628	ENSRNOG00000008644	NA	NA	NA	predicted	16.5624	microcosm
MIMAT0003199	rno-miR-381-3p	Ccnl2	298686	ENSRNOG00000018691	NA	NA	NA	predicted	16.5567	microcosm
MIMAT0003199	rno-miR-381-3p	Cyp2c			NA	NA	NA	predicted	16.5542	microcosm
MIMAT0003199	rno-miR-381-3p	LOC500148		ENSRNOG00000038471	NA	NA	NA	predicted	16.5457	microcosm
MIMAT0003199	rno-miR-381-3p	Ltbp4	292734	ENSRNOG00000020871	NA	NA	NA	predicted	16.5352	microcosm
MIMAT0003199	rno-miR-381-3p	Prss40	102554718	ENSRNOG00000023858	NA	NA	NA	predicted	16.5352	microcosm
MIMAT0003199	rno-miR-381-3p	Prss39	363215	ENSRNOG00000023858	NA	NA	NA	predicted	16.5352	microcosm
MIMAT0003199	rno-miR-381-3p	Nop58	60373	ENSRNOG00000016486	NA	NA	NA	predicted	16.5352	microcosm
MIMAT0003199	rno-miR-381-3p	Mogs	78947	ENSRNOG00000008648	NA	NA	NA	predicted	16.5352	microcosm
MIMAT0003199	rno-miR-381-3p	Spc24		ENSRNOG00000029862	NA	NA	NA	predicted	16.5352	microcosm
MIMAT0003199	rno-miR-381-3p	Myl12a	501203	ENSRNOG00000015278	NA	NA	NA	predicted	16.5352	microcosm
MIMAT0003199	rno-miR-381-3p	Vom2r44	266778	ENSRNOG00000010268	NA	NA	NA	predicted	16.5352	microcosm
MIMAT0003199	rno-miR-381-3p	Dhrs7	299135	ENSRNOG00000005589	NA	NA	NA	predicted	16.5352	microcosm
MIMAT0003199	rno-miR-381-3p	Snrnp25	287170	ENSRNOG00000020626	NA	NA	NA	predicted	16.5352	microcosm
MIMAT0003199	rno-miR-381-3p	Plch2	313756	ENSRNOG00000014226	NA	NA	NA	predicted	16.5341	microcosm
MIMAT0003199	rno-miR-381-3p	Ccdc121	289329	ENSRNOG00000022717	NA	NA	NA	predicted	16.5341	microcosm
MIMAT0003199	rno-miR-381-3p	Hbs1l	293408	ENSRNOG00000014531	NA	NA	NA	predicted	16.5341	microcosm
MIMAT0003199	rno-miR-381-3p	Ihpk2			NA	NA	NA	predicted	16.5341	microcosm
MIMAT0003199	rno-miR-381-3p	Sobp	309860	ENSRNOG00000000316	NA	NA	NA	predicted	16.5341	microcosm
MIMAT0003199	rno-miR-381-3p	RGD1559837_predicted			NA	NA	NA	predicted	16.5341	microcosm
MIMAT0003199	rno-miR-381-3p	Pdzd9	308954	ENSRNOG00000016292	NA	NA	NA	predicted	16.5341	microcosm
MIMAT0003199	rno-miR-381-3p	Olr811	405138	ENSRNOG00000005403	NA	NA	NA	predicted	16.5341	microcosm
MIMAT0003199	rno-miR-381-3p	Narf	360681	ENSRNOG00000036664	NA	NA	NA	predicted	16.5341	microcosm
MIMAT0003199	rno-miR-381-3p	Mff	102556337	ENSRNOG00000048016	NA	NA	NA	predicted	16.5341	microcosm
MIMAT0003199	rno-miR-381-3p	Slc25a26_predicted			NA	NA	NA	predicted	16.5341	microcosm
MIMAT0003199	rno-miR-381-3p	O88943-7			NA	NA	NA	predicted	16.5341	microcosm
MIMAT0003199	rno-miR-381-3p	Baz2a	304601	ENSRNOG00000028816	NA	NA	NA	predicted	16.5341	microcosm
MIMAT0003199	rno-miR-381-3p	Slc6a6	29464	ENSRNOG00000009019	NA	NA	NA	predicted	16.5335	microcosm
MIMAT0003199	rno-miR-381-3p	Mrps27	361883	ENSRNOG00000017272	NA	NA	NA	predicted	16.5235	microcosm
MIMAT0003199	rno-miR-381-3p	Gstm6l		ENSRNOG00000047108	NA	NA	NA	predicted	16.5154	microcosm
MIMAT0003199	rno-miR-381-3p	Gstm6		ENSRNOG00000047108	NA	NA	NA	predicted	16.5154	microcosm
MIMAT0003199	rno-miR-381-3p	Ctdspl_predicted			NA	NA	NA	predicted	16.5122	microcosm
MIMAT0003199	rno-miR-381-3p	Rnaseh2a	364974	ENSRNOG00000003504	NA	NA	NA	predicted	16.5066	microcosm
MIMAT0003199	rno-miR-381-3p	LOC688526	688526	ENSRNOG00000027239	NA	NA	NA	predicted	16.4997	microcosm
MIMAT0003199	rno-miR-381-3p	Dyrk1a	25255	ENSRNOG00000001662	NA	NA	NA	predicted	16.4947	microcosm
MIMAT0003199	rno-miR-381-3p	Lrrc55	311171	ENSRNOG00000028266	NA	NA	NA	predicted	16.4891	microcosm
MIMAT0003199	rno-miR-381-3p	Ndufb10	681418	ENSRNOG00000014568	NA	NA	NA	predicted	16.4868	microcosm
MIMAT0003199	rno-miR-381-3p	Scgb3a2	498854	ENSRNOG00000026912	NA	NA	NA	predicted	16.4845	microcosm
MIMAT0003199	rno-miR-381-3p	Gjc3	288529	ENSRNOG00000001329	NA	NA	NA	predicted	16.4831	microcosm
MIMAT0003199	rno-miR-381-3p	Cops8	363283	ENSRNOG00000019635	NA	NA	NA	predicted	16.4827	microcosm
MIMAT0003199	rno-miR-381-3p	Cetn3	100912538	ENSRNOG00000050877	NA	NA	NA	predicted	16.4782	microcosm
MIMAT0003199	rno-miR-381-3p	LOC688424		ENSRNOG00000000252	NA	NA	NA	predicted	16.4765	microcosm
MIMAT0003199	rno-miR-381-3p	Tubd1_predicted			NA	NA	NA	predicted	16.4714	microcosm
MIMAT0003199	rno-miR-381-3p	Spag17			NA	NA	NA	predicted	16.4654	microcosm
MIMAT0003199	rno-miR-381-3p	MGC112727			NA	NA	NA	predicted	16.4638	microcosm
MIMAT0003199	rno-miR-381-3p	Adcy9_predicted			NA	NA	NA	predicted	16.4579	microcosm
MIMAT0003199	rno-miR-381-3p	Stard3nl	291182	ENSRNOG00000052429	NA	NA	NA	predicted	16.4574	microcosm
MIMAT0003199	rno-miR-381-3p	Cpne9	297516	ENSRNOG00000023077	NA	NA	NA	predicted	16.4563	microcosm
MIMAT0003199	rno-miR-381-3p	Cep97	304007	ENSRNOG00000001609	NA	NA	NA	predicted	16.4551	microcosm
MIMAT0003199	rno-miR-381-3p	Cdkal1	361243	ENSRNOG00000018381	NA	NA	NA	predicted	16.4546	microcosm
MIMAT0003199	rno-miR-381-3p	Zfp341		ENSRNOG00000017086	NA	NA	NA	predicted	16.4544	microcosm
MIMAT0003199	rno-miR-381-3p	Tom1	361370	ENSRNOG00000014093	NA	NA	NA	predicted	16.4537	microcosm
MIMAT0003199	rno-miR-381-3p	Tbc1d10a	360968	ENSRNOG00000006394	NA	NA	NA	predicted	16.4516	microcosm
MIMAT0003199	rno-miR-381-3p	Ankfn1	100364574	ENSRNOG00000023532	NA	NA	NA	predicted	16.4512	microcosm
MIMAT0003199	rno-miR-381-3p	Matn3_predicted			NA	NA	NA	predicted	16.4487	microcosm
MIMAT0003199	rno-miR-381-3p	Olr382	293815	ENSRNOG00000013208	NA	NA	NA	predicted	16.4487	microcosm
MIMAT0003199	rno-miR-381-3p	Prim2	301323	ENSRNOG00000012486	NA	NA	NA	predicted	16.441	microcosm
MIMAT0003199	rno-miR-381-3p	Slc39a8	295455	ENSRNOG00000012508	NA	NA	NA	predicted	16.4344	microcosm
MIMAT0003199	rno-miR-381-3p	Slc25a31	689108	ENSRNOG00000038398	NA	NA	NA	predicted	16.4334	microcosm
MIMAT0003199	rno-miR-381-3p	LOC100911917	499762	ENSRNOG00000005059	NA	NA	NA	predicted	16.4288	microcosm
MIMAT0003199	rno-miR-381-3p	Olr1679	405193	ENSRNOG00000047267	NA	NA	NA	predicted	16.4288	microcosm
MIMAT0003199	rno-miR-381-3p	LOC681383	681383	ENSRNOG00000040171	NA	NA	NA	predicted	16.4288	microcosm
MIMAT0003199	rno-miR-381-3p	LOC100910263	100910263	ENSRNOG00000046412	NA	NA	NA	predicted	16.4288	microcosm
MIMAT0003199	rno-miR-381-3p	Zfp53_predicted			NA	NA	NA	predicted	16.4288	microcosm
MIMAT0003199	rno-miR-381-3p	Olr56	293205	ENSRNOG00000015412	NA	NA	NA	predicted	16.4288	microcosm
MIMAT0003199	rno-miR-381-3p	VEGP1_RAT			NA	NA	NA	predicted	16.4288	microcosm
MIMAT0003199	rno-miR-381-3p	LOC100911601	100911601	ENSRNOG00000015412	NA	NA	NA	predicted	16.4288	microcosm
MIMAT0003199	rno-miR-381-3p	CN716893			NA	NA	NA	predicted	16.4288	microcosm
MIMAT0003199	rno-miR-381-3p	Med22	499762	ENSRNOG00000005059	NA	NA	NA	predicted	16.4288	microcosm
MIMAT0003199	rno-miR-381-3p	Rpl13	100361259	ENSRNOG00000015335	NA	NA	NA	predicted	16.4288	microcosm
MIMAT0003199	rno-miR-381-3p	Rnps1	287113	ENSRNOG00000008703	NA	NA	NA	predicted	16.4288	microcosm
MIMAT0003199	rno-miR-381-3p	Olr1675	100910263	ENSRNOG00000046412	NA	NA	NA	predicted	16.4288	microcosm
MIMAT0003199	rno-miR-381-3p	Olr662	405948	ENSRNOG00000048178	NA	NA	NA	predicted	16.4288	microcosm
MIMAT0003199	rno-miR-381-3p	Akap13	293024	ENSRNOG00000010964	NA	NA	NA	predicted	16.4288	microcosm
MIMAT0003199	rno-miR-381-3p	LOC100365964	100911601	ENSRNOG00000015412	NA	NA	NA	predicted	16.4288	microcosm
MIMAT0003199	rno-miR-381-3p	Chrnb4	25103	ENSRNOG00000014427	NA	NA	NA	predicted	16.4288	microcosm
MIMAT0003199	rno-miR-381-3p	Krt84	315320	ENSRNOG00000008819	NA	NA	NA	predicted	16.4288	microcosm
MIMAT0003199	rno-miR-381-3p	RGD1566120	497904	ENSRNOG00000026596	NA	NA	NA	predicted	16.4288	microcosm
MIMAT0003199	rno-miR-381-3p	Zbtb42	691556	ENSRNOG00000037562	NA	NA	NA	predicted	16.4288	microcosm
MIMAT0003199	rno-miR-381-3p	Catsper4	362623	ENSRNOG00000016312	NA	NA	NA	predicted	16.4288	microcosm
MIMAT0003199	rno-miR-381-3p	Wdr37_predicted			NA	NA	NA	predicted	16.4288	microcosm
MIMAT0003199	rno-miR-381-3p	Lcn1p1	65039	ENSRNOG00000033761	NA	NA	NA	predicted	16.4288	microcosm
MIMAT0003199	rno-miR-381-3p	Bloc1s5	306868	ENSRNOG00000016497	NA	NA	NA	predicted	16.4196	microcosm
MIMAT0003199	rno-miR-381-3p	Mrps33	296995	ENSRNOG00000026528	NA	NA	NA	predicted	16.4196	microcosm
MIMAT0003199	rno-miR-381-3p	Hnrnpm	116655	ENSRNOG00000007921	NA	NA	NA	predicted	16.4196	microcosm
MIMAT0003199	rno-miR-381-3p	Cldn14	304073	ENSRNOG00000001691	NA	NA	NA	predicted	16.4196	microcosm
MIMAT0003199	rno-miR-381-3p	Stag1_predicted			NA	NA	NA	predicted	16.4196	microcosm
MIMAT0003199	rno-miR-381-3p	Prpf3_predicted			NA	NA	NA	predicted	16.4196	microcosm
MIMAT0003199	rno-miR-381-3p	Tesc	288689	ENSRNOG00000001128	NA	NA	NA	predicted	16.4196	microcosm
MIMAT0003199	rno-miR-381-3p	Tst	25274	ENSRNOG00000000186	NA	NA	NA	predicted	16.4196	microcosm
MIMAT0003199	rno-miR-381-3p	Ddx3x	317335	ENSRNOG00000023383	NA	NA	NA	predicted	16.4196	microcosm
MIMAT0003199	rno-miR-381-3p	Aga	290923	ENSRNOG00000000108	NA	NA	NA	predicted	16.4196	microcosm
MIMAT0003199	rno-miR-381-3p	Bpifa5	311559	ENSRNOG00000013908	NA	NA	NA	predicted	16.4196	microcosm
MIMAT0003199	rno-miR-381-3p	RGD1304579			NA	NA	NA	predicted	16.4148	microcosm
MIMAT0003199	rno-miR-381-3p	Q63287_RAT			NA	NA	NA	predicted	16.4113	microcosm
MIMAT0003199	rno-miR-381-3p	T	292301	ENSRNOG00000012229	NA	NA	NA	predicted	16.4086	microcosm
MIMAT0003199	rno-miR-381-3p	Nuf2	304951	ENSRNOG00000002711	NA	NA	NA	predicted	16.4068	microcosm
MIMAT0003199	rno-miR-381-3p	Elavl1	363854	ENSRNOG00000001069	NA	NA	NA	predicted	16.3965	microcosm
MIMAT0003199	rno-miR-381-3p	Sp100	100366216	ENSRNOG00000022769	NA	NA	NA	predicted	16.3928	microcosm
MIMAT0003199	rno-miR-381-3p	RGD1564541	313433	ENSRNOG00000012564	NA	NA	NA	predicted	16.3891	microcosm
MIMAT0003199	rno-miR-381-3p	Mapkapk3	315994	ENSRNOG00000014832	NA	NA	NA	predicted	16.3864	microcosm
MIMAT0003199	rno-miR-381-3p	Elk3	362871	ENSRNOG00000004367	NA	NA	NA	predicted	16.3809	microcosm
MIMAT0003199	rno-miR-381-3p	Ppef1	317498	ENSRNOG00000027331	NA	NA	NA	predicted	16.3773	microcosm
MIMAT0003199	rno-miR-381-3p	Sccpdh	100910414	ENSRNOG00000037984	NA	NA	NA	predicted	16.3773	microcosm
MIMAT0003199	rno-miR-381-3p	LOC100910414	305021	ENSRNOG00000037984	NA	NA	NA	predicted	16.3773	microcosm
MIMAT0003199	rno-miR-381-3p	RGD1305938	310362	ENSRNOG00000052775	NA	NA	NA	predicted	16.3753	microcosm
MIMAT0003199	rno-miR-381-3p	Cmya3			NA	NA	NA	predicted	16.3745	microcosm
MIMAT0003199	rno-miR-381-3p	Rnf182	498726	ENSRNOG00000018070	NA	NA	NA	predicted	16.3735	microcosm
MIMAT0003199	rno-miR-381-3p	Lrrc17	502715	ENSRNOG00000012817	NA	NA	NA	predicted	16.3699	microcosm
MIMAT0003199	rno-miR-381-3p	Olr1158	405169	ENSRNOG00000026232	NA	NA	NA	predicted	16.3659	microcosm
MIMAT0003199	rno-miR-381-3p	LOC365732			NA	NA	NA	predicted	16.3646	microcosm
MIMAT0003199	rno-miR-381-3p	Tac4	282829	ENSRNOG00000004404	NA	NA	NA	predicted	16.3615	microcosm
MIMAT0003199	rno-miR-381-3p	Tas2r120	690448	ENSRNOG00000021445	NA	NA	NA	predicted	16.3583	microcosm
MIMAT0003199	rno-miR-381-3p	Olr1662_predicted			NA	NA	NA	predicted	16.3565	microcosm
MIMAT0003199	rno-miR-381-3p	Lamb3	305078	ENSRNOG00000006025	NA	NA	NA	predicted	16.3558	microcosm
MIMAT0003199	rno-miR-381-3p	Olr1737	405349	ENSRNOG00000048048	NA	NA	NA	predicted	16.3458	microcosm
MIMAT0003199	rno-miR-381-3p	Srrm1_predicted			NA	NA	NA	predicted	16.3458	microcosm
MIMAT0003199	rno-miR-381-3p	Txndc2	316777	ENSRNOG00000027916	NA	NA	NA	predicted	16.3441	microcosm
MIMAT0003199	rno-miR-381-3p	Ttc7a	362696	ENSRNOG00000014879	NA	NA	NA	predicted	16.3421	microcosm
MIMAT0003199	rno-miR-381-3p	Olr569	100911380	ENSRNOG00000046501	NA	NA	NA	predicted	16.3351	microcosm
MIMAT0003199	rno-miR-381-3p	LOC100911380	295828	ENSRNOG00000046501	NA	NA	NA	predicted	16.3351	microcosm
MIMAT0003199	rno-miR-381-3p	Olr598	295828	ENSRNOG00000046501	NA	NA	NA	predicted	16.3351	microcosm
MIMAT0003199	rno-miR-381-3p	Lrfn1	365222	ENSRNOG00000019869	NA	NA	NA	predicted	16.3246	microcosm
MIMAT0003199	rno-miR-381-3p	Atg7	312647	ENSRNOG00000007486	NA	NA	NA	predicted	16.3235	microcosm
MIMAT0003199	rno-miR-381-3p	Wdr18	314617	ENSRNOG00000012379	NA	NA	NA	predicted	16.3235	microcosm
MIMAT0003199	rno-miR-381-3p	Smc3	29486	ENSRNOG00000014173	NA	NA	NA	predicted	16.3235	microcosm
MIMAT0003199	rno-miR-381-3p	RGD1565088_predicted			NA	NA	NA	predicted	16.3235	microcosm
MIMAT0003199	rno-miR-381-3p	Tada2b	289717	ENSRNOG00000027326	NA	NA	NA	predicted	16.3235	microcosm
MIMAT0003199	rno-miR-381-3p	Hoxa5	100909641	ENSRNOG00000006466	NA	NA	NA	predicted	16.3039	microcosm
MIMAT0003199	rno-miR-381-3p	LOC100909641	100909641	ENSRNOG00000006466	NA	NA	NA	predicted	16.3039	microcosm
MIMAT0003199	rno-miR-381-3p	Rab3c	171058	ENSRNOG00000011623	NA	NA	NA	predicted	16.3039	microcosm
MIMAT0003199	rno-miR-381-3p	LOC100911546	100909641	ENSRNOG00000006466	NA	NA	NA	predicted	16.3039	microcosm
MIMAT0003199	rno-miR-381-3p	Smu1	117541	ENSRNOG00000007671	NA	NA	NA	predicted	16.3039	microcosm
MIMAT0003199	rno-miR-381-3p	Larp6	315731	ENSRNOG00000012438	NA	NA	NA	predicted	16.3039	microcosm
MIMAT0003199	rno-miR-381-3p	Abhd8	306338	ENSRNOG00000000054	NA	NA	NA	predicted	16.3034	microcosm
MIMAT0003199	rno-miR-381-3p	Olr286	365384	ENSRNOG00000018955	NA	NA	NA	predicted	16.2851	microcosm
MIMAT0003199	rno-miR-381-3p	Sec23ip	309010	ENSRNOG00000020411	NA	NA	NA	predicted	16.2816	microcosm
MIMAT0003199	rno-miR-381-3p	LOC680782			NA	NA	NA	predicted	16.2664	microcosm
MIMAT0003199	rno-miR-381-3p	LOC690911			NA	NA	NA	predicted	16.261	microcosm
MIMAT0003199	rno-miR-381-3p	Gpr111	301269	ENSRNOG00000025603	NA	NA	NA	predicted	16.2553	microcosm
MIMAT0003199	rno-miR-381-3p	Nckap1l_predicted			NA	NA	NA	predicted	16.2503	microcosm
MIMAT0003199	rno-miR-381-3p	Hmg20a_predicted			NA	NA	NA	predicted	16.2458	microcosm
MIMAT0003199	rno-miR-381-3p	Fam221a	500118	ENSRNOG00000009447	NA	NA	NA	predicted	16.2358	microcosm
MIMAT0003199	rno-miR-381-3p	RGD1564342_predicted			NA	NA	NA	predicted	16.2182	microcosm
MIMAT0003199	rno-miR-381-3p	Galr2	29234	ENSRNOG00000009407	NA	NA	NA	predicted	16.2182	microcosm
MIMAT0003199	rno-miR-381-3p	Xpo7	361070	ENSRNOG00000013288	NA	NA	NA	predicted	16.2182	microcosm
MIMAT0003199	rno-miR-381-3p	LOC100359546	100359546	ENSRNOG00000029847	NA	NA	NA	predicted	16.2182	microcosm
MIMAT0003199	rno-miR-381-3p	DYL1_RAT			NA	NA	NA	predicted	16.2182	microcosm
MIMAT0003199	rno-miR-381-3p	Bmp10	500245	ENSRNOG00000009316	NA	NA	NA	predicted	16.2182	microcosm
MIMAT0003199	rno-miR-381-3p	Sh3glb1	292156	ENSRNOG00000012957	NA	NA	NA	predicted	16.204	microcosm
MIMAT0003199	rno-miR-381-3p	Eif3s10			NA	NA	NA	predicted	16.1884	microcosm
MIMAT0003199	rno-miR-381-3p	Fam178b		ENSRNOG00000046298	NA	NA	NA	predicted	16.1883	microcosm
MIMAT0003199	rno-miR-381-3p	Il10ra	117539	ENSRNOG00000016308	NA	NA	NA	predicted	16.1883	microcosm
MIMAT0003199	rno-miR-381-3p	Brwd3_predicted			NA	NA	NA	predicted	16.1735	microcosm
MIMAT0003199	rno-miR-381-3p	RGD1304624	314128	ENSRNOG00000006986	NA	NA	NA	predicted	16.1698	microcosm
MIMAT0003199	rno-miR-381-3p	MITF_RAT			NA	NA	NA	predicted	16.1647	microcosm
MIMAT0003199	rno-miR-381-3p	Tulp4	499016	ENSRNOG00000018012	NA	NA	NA	predicted	16.1601	microcosm
MIMAT0003199	rno-miR-381-3p	RGD1306656_predicted			NA	NA	NA	predicted	16.1532	microcosm
MIMAT0003199	rno-miR-381-3p	Sema4a	310630	ENSRNOG00000019737	NA	NA	NA	predicted	16.1494	microcosm
MIMAT0003199	rno-miR-381-3p	Olr1250_predicted			NA	NA	NA	predicted	16.1414	microcosm
MIMAT0003199	rno-miR-381-3p	Chst11	314694	ENSRNOG00000008885	NA	NA	NA	predicted	16.139	microcosm
MIMAT0003199	rno-miR-381-3p	Ptov1	292888	ENSRNOG00000020358	NA	NA	NA	predicted	16.1216	microcosm
MIMAT0003199	rno-miR-381-3p	Ccl28	114492	ENSRNOG00000059640	NA	NA	NA	predicted	16.1207	microcosm
MIMAT0003199	rno-miR-381-3p	Wdr55	307494	ENSRNOG00000017251	NA	NA	NA	predicted	16.1129	microcosm
MIMAT0003199	rno-miR-381-3p	Agtpbp1	290986	ENSRNOG00000018651	NA	NA	NA	predicted	16.1129	microcosm
MIMAT0003199	rno-miR-381-3p	Foxr2	302583	ENSRNOG00000030619	NA	NA	NA	predicted	16.1129	microcosm
MIMAT0003199	rno-miR-381-3p	Pcdhb2	498843	ENSRNOG00000039476	NA	NA	NA	predicted	16.1129	microcosm
MIMAT0003199	rno-miR-381-3p	NP_620211.2			NA	NA	NA	predicted	16.1129	microcosm
MIMAT0003199	rno-miR-381-3p	Fxr1h			NA	NA	NA	predicted	16.1048	microcosm
MIMAT0003199	rno-miR-381-3p	Tas2r116	100310877	ENSRNOG00000021366	NA	NA	NA	predicted	16.0767	microcosm
MIMAT0003199	rno-miR-381-3p	Elmsan1	314306	ENSRNOG00000010653	NA	NA	NA	predicted	16.0763	microcosm
MIMAT0003199	rno-miR-381-3p	Atf4	79255	ENSRNOG00000017801	NA	NA	NA	predicted	16.0727	microcosm
MIMAT0003199	rno-miR-381-3p	Iws1	291705	ENSRNOG00000014630	NA	NA	NA	predicted	16.0727	microcosm
MIMAT0003199	rno-miR-381-3p	Cyb561d2	363137	ENSRNOG00000021887	NA	NA	NA	predicted	16.0727	microcosm
MIMAT0003199	rno-miR-381-3p	Ascl4	299687	ENSRNOG00000031493	NA	NA	NA	predicted	16.0537	microcosm
MIMAT0003199	rno-miR-381-3p	RGD1563293	289269	ENSRNOG00000038076	NA	NA	NA	predicted	16.0349	microcosm
MIMAT0003199	rno-miR-381-3p	Nup160	311182	ENSRNOG00000028215	NA	NA	NA	predicted	16.0278	microcosm
MIMAT0003199	rno-miR-381-3p	Arhgef12	367072	ENSRNOG00000008924	NA	NA	NA	predicted	16.0075	microcosm
MIMAT0003199	rno-miR-381-3p	Cntn1	117258	ENSRNOG00000004438	NA	NA	NA	predicted	16.0075	microcosm
MIMAT0003199	rno-miR-381-3p	Pias1_predicted			NA	NA	NA	predicted	16.0057	microcosm
MIMAT0003199	rno-miR-381-3p	Slc7a6os	246187	ENSRNOG00000020049	NA	NA	NA	predicted	15.9956	microcosm
MIMAT0003199	rno-miR-381-3p	Tm7sf3	297725	ENSRNOG00000001817	NA	NA	NA	predicted	15.9746	microcosm
MIMAT0003199	rno-miR-381-3p	Klf2	306330	ENSRNOG00000014205	NA	NA	NA	predicted	15.9609	microcosm
MIMAT0003199	rno-miR-381-3p	Atat1	361789	ENSRNOG00000000809	NA	NA	NA	predicted	15.957	microcosm
MIMAT0003199	rno-miR-381-3p	Hps6	309446	ENSRNOG00000018433	NA	NA	NA	predicted	15.957	microcosm
MIMAT0003199	rno-miR-381-3p	Lrrfip2	301035	ENSRNOG00000021047	NA	NA	NA	predicted	15.957	microcosm
MIMAT0003199	rno-miR-381-3p	Riok1	291061	ENSRNOG00000014049	NA	NA	NA	predicted	15.957	microcosm
MIMAT0003199	rno-miR-381-3p	Ccdc59	314799	ENSRNOG00000004183	NA	NA	NA	predicted	15.957	microcosm
MIMAT0003199	rno-miR-381-3p	Ppil4	361449	ENSRNOG00000015552	NA	NA	NA	predicted	15.9502	microcosm
MIMAT0003199	rno-miR-381-3p	RGD1560813	689408	ENSRNOG00000007026	NA	NA	NA	predicted	15.9361	microcosm
MIMAT0003199	rno-miR-381-3p	LOC685069	685909	ENSRNOG00000007026	NA	NA	NA	predicted	15.9361	microcosm
MIMAT0003199	rno-miR-381-3p	H2afv	685909	ENSRNOG00000007026	NA	NA	NA	predicted	15.9361	microcosm
MIMAT0003199	rno-miR-381-3p	LOC689408	685069	ENSRNOG00000007026	NA	NA	NA	predicted	15.9361	microcosm
MIMAT0003199	rno-miR-381-3p	LOC685909	685069	ENSRNOG00000007026	NA	NA	NA	predicted	15.9361	microcosm
MIMAT0003199	rno-miR-381-3p	Q3U5A7_MOUSE			NA	NA	NA	predicted	15.9337	microcosm
MIMAT0003199	rno-miR-381-3p	LOC100361655	100361655	ENSRNOG00000003266	NA	NA	NA	predicted	15.9337	microcosm
MIMAT0003199	rno-miR-381-3p	Dcaf6	289181	ENSRNOG00000003078	NA	NA	NA	predicted	15.9315	microcosm
MIMAT0003199	rno-miR-381-3p	Magee2	302392	ENSRNOG00000021400	NA	NA	NA	predicted	15.9252	microcosm
MIMAT0003199	rno-miR-381-3p	Snapc1	314228	ENSRNOG00000009296	NA	NA	NA	predicted	15.9082	microcosm
MIMAT0003199	rno-miR-381-3p	Ccnt2_predicted			NA	NA	NA	predicted	15.9022	microcosm
MIMAT0003199	rno-miR-381-3p	Q3UNV9_MOUSE			NA	NA	NA	predicted	15.9022	microcosm
MIMAT0003199	rno-miR-381-3p	Gjd4	266707	ENSRNOG00000018407	NA	NA	NA	predicted	15.9022	microcosm
MIMAT0003199	rno-miR-381-3p	LOC100912350	100912350	ENSRNOG00000013565	NA	NA	NA	predicted	15.9022	microcosm
MIMAT0003199	rno-miR-381-3p	Zfp507	292816	ENSRNOG00000013565	NA	NA	NA	predicted	15.9022	microcosm
MIMAT0003199	rno-miR-381-3p	Krtcap2	295243	ENSRNOG00000020542	NA	NA	NA	predicted	15.9022	microcosm
MIMAT0003199	rno-miR-381-3p	Chmp6	287873	ENSRNOG00000004014	NA	NA	NA	predicted	15.9022	microcosm
MIMAT0003199	rno-miR-381-3p	Rergl	500356	ENSRNOG00000008130	NA	NA	NA	predicted	15.9022	microcosm
MIMAT0003199	rno-miR-381-3p	RGD1304929	290403	ENSRNOG00000022760	NA	NA	NA	predicted	15.892	microcosm
MIMAT0003199	rno-miR-381-3p	Asns	25612	ENSRNOG00000007546	NA	NA	NA	predicted	15.8894	microcosm
MIMAT0003199	rno-miR-381-3p	Pycard	282817	ENSRNOG00000019675	NA	NA	NA	predicted	15.8866	microcosm
MIMAT0003199	rno-miR-381-3p	Ssr3		ENSRNOG00000011148	NA	NA	NA	predicted	15.8853	microcosm
MIMAT0003199	rno-miR-381-3p	Gtse1	300126	ENSRNOG00000016148	NA	NA	NA	predicted	15.881	microcosm
MIMAT0003199	rno-miR-381-3p	LOC100361944	100361944	ENSRNOG00000029172	NA	NA	NA	predicted	15.8752	microcosm
MIMAT0003199	rno-miR-381-3p	Mum1_predicted			NA	NA	NA	predicted	15.8742	microcosm
MIMAT0003199	rno-miR-381-3p	Fcrlb	498275	ENSRNOG00000003135	NA	NA	NA	predicted	15.8721	microcosm
MIMAT0003199	rno-miR-381-3p	Ywhah	25576	ENSRNOG00000055471	NA	NA	NA	predicted	15.8658	microcosm
MIMAT0003199	rno-miR-381-3p	Ubac1	362087	ENSRNOG00000017983	NA	NA	NA	predicted	15.8645	microcosm
MIMAT0003199	rno-miR-381-3p	Trabd	300142	ENSRNOG00000029095	NA	NA	NA	predicted	15.8628	microcosm
MIMAT0003199	rno-miR-381-3p	Dhx38	292007	ENSRNOG00000014619	NA	NA	NA	predicted	15.8468	microcosm
MIMAT0003199	rno-miR-381-3p	Ube2t	360847	ENSRNOG00000005038	NA	NA	NA	predicted	15.8414	microcosm
MIMAT0003199	rno-miR-381-3p	A2m	100911545	ENSRNOG00000028896	NA	NA	NA	predicted	15.8414	microcosm
MIMAT0003199	rno-miR-381-3p	Ppwd1	294711	ENSRNOG00000012505	NA	NA	NA	predicted	15.8414	microcosm
MIMAT0003199	rno-miR-381-3p	S100a8	116547	ENSRNOG00000011557	NA	NA	NA	predicted	15.8414	microcosm
MIMAT0003199	rno-miR-381-3p	Psmc5	81827	ENSRNOG00000010038	NA	NA	NA	predicted	15.8414	microcosm
MIMAT0003199	rno-miR-381-3p	Q568Z5_RAT			NA	NA	NA	predicted	15.8355	microcosm
MIMAT0003199	rno-miR-381-3p	Lrig2	310753	ENSRNOG00000019957	NA	NA	NA	predicted	15.828	microcosm
MIMAT0003199	rno-miR-381-3p	Galnt3	366061	ENSRNOG00000005727	NA	NA	NA	predicted	15.8209	microcosm
MIMAT0003199	rno-miR-381-3p	Fate1			NA	NA	NA	predicted	15.8209	microcosm
MIMAT0003199	rno-miR-381-3p	Adad2		ENSRNOG00000015690	NA	NA	NA	predicted	15.8176	microcosm
MIMAT0003199	rno-miR-381-3p	LOC691835			NA	NA	NA	predicted	15.815	microcosm
MIMAT0003199	rno-miR-381-3p	Tmod3	300838	ENSRNOG00000032436	NA	NA	NA	predicted	15.8144	microcosm
MIMAT0003199	rno-miR-381-3p	Aurkb	114592	ENSRNOG00000005659	NA	NA	NA	predicted	15.8085	microcosm
MIMAT0003199	rno-miR-381-3p	Osgin2	313085	ENSRNOG00000009358	NA	NA	NA	predicted	15.8041	microcosm
MIMAT0003199	rno-miR-381-3p	Slc39a10	363229	ENSRNOG00000011677	NA	NA	NA	predicted	15.7971	microcosm
MIMAT0003199	rno-miR-381-3p	Hspa14	307133	ENSRNOG00000015212	NA	NA	NA	predicted	15.7969	microcosm
MIMAT0003199	rno-miR-381-3p	Ablim2	360958	ENSRNOG00000007882	NA	NA	NA	predicted	15.7969	microcosm
MIMAT0003199	rno-miR-381-3p	Olr782_predicted			NA	NA	NA	predicted	15.7969	microcosm
MIMAT0003199	rno-miR-381-3p	Mrpl10	691075	ENSRNOG00000009567	NA	NA	NA	predicted	15.7969	microcosm
MIMAT0003199	rno-miR-381-3p	Ebpl	361054	ENSRNOG00000014659	NA	NA	NA	predicted	15.7925	microcosm
MIMAT0003199	rno-miR-381-3p	Rkhd2			NA	NA	NA	predicted	15.7743	microcosm
MIMAT0003199	rno-miR-381-3p	RGD1560391_predicted			NA	NA	NA	predicted	15.7681	microcosm
MIMAT0003199	rno-miR-381-3p	Xpnpep1	170751	ENSRNOG00000012084	NA	NA	NA	predicted	15.7571	microcosm
MIMAT0003199	rno-miR-381-3p	Oasl	304545	ENSRNOG00000001187	NA	NA	NA	predicted	15.7512	microcosm
MIMAT0003199	rno-miR-381-3p	Olr584	404861	ENSRNOG00000005742	NA	NA	NA	predicted	15.74	microcosm
MIMAT0003199	rno-miR-381-3p	Vac14	307842	ENSRNOG00000017219	NA	NA	NA	predicted	15.7392	microcosm
MIMAT0003199	rno-miR-381-3p	Srf	501099	ENSRNOG00000018232	NA	NA	NA	predicted	15.7264	microcosm
MIMAT0003199	rno-miR-381-3p	Nubpl	299008	ENSRNOG00000027444	NA	NA	NA	predicted	15.7258	microcosm
MIMAT0003199	rno-miR-381-3p	Timm17b	100911130	ENSRNOG00000025156	NA	NA	NA	predicted	15.7258	microcosm
MIMAT0003199	rno-miR-381-3p	LOC100911130	317374	ENSRNOG00000025156	NA	NA	NA	predicted	15.7258	microcosm
MIMAT0003199	rno-miR-381-3p	LOC100911902	100911902	ENSRNOG00000022101	NA	NA	NA	predicted	15.7258	microcosm
MIMAT0003199	rno-miR-381-3p	Smc6	313961	ENSRNOG00000004908	NA	NA	NA	predicted	15.7258	microcosm
MIMAT0003199	rno-miR-381-3p	Rrp9	363134	ENSRNOG00000012927	NA	NA	NA	predicted	15.7258	microcosm
MIMAT0003199	rno-miR-381-3p	Crabp2	29563	ENSRNOG00000022101	NA	NA	NA	predicted	15.7258	microcosm
MIMAT0003199	rno-miR-381-3p	Top3b	287930	ENSRNOG00000001845	NA	NA	NA	predicted	15.7258	microcosm
MIMAT0003199	rno-miR-381-3p	Plg	85253	ENSRNOG00000017223	NA	NA	NA	predicted	15.7258	microcosm
MIMAT0003199	rno-miR-381-3p	Thbs4	29220	ENSRNOG00000012471	NA	NA	NA	predicted	15.7227	microcosm
MIMAT0003199	rno-miR-381-3p	Pdzrn3_predicted			NA	NA	NA	predicted	15.7218	microcosm
MIMAT0003199	rno-miR-381-3p	LOC102553180	102553180	ENSRNOG00000048674	NA	NA	NA	predicted	15.7154	microcosm
MIMAT0003199	rno-miR-381-3p	Clec14a	314148	ENSRNOG00000022697	NA	NA	NA	predicted	15.7106	microcosm
MIMAT0003199	rno-miR-381-3p	Prdx3	64371	ENSRNOG00000010958	NA	NA	NA	predicted	15.6922	microcosm
MIMAT0003199	rno-miR-381-3p	Pias4	362827	ENSRNOG00000020230	NA	NA	NA	predicted	15.6917	microcosm
MIMAT0003199	rno-miR-381-3p	Pik3r4	363131	ENSRNOG00000013669	NA	NA	NA	predicted	15.6916	microcosm
MIMAT0003199	rno-miR-381-3p	Hbq1	100361053	ENSRNOG00000028114	NA	NA	NA	predicted	15.6916	microcosm
MIMAT0003199	rno-miR-381-3p	LOC683549	685680	ENSRNOG00000022136	NA	NA	NA	predicted	15.6916	microcosm
MIMAT0003199	rno-miR-381-3p	Hdh			NA	NA	NA	predicted	15.6916	microcosm
MIMAT0003199	rno-miR-381-3p	Tmem2_predicted			NA	NA	NA	predicted	15.6916	microcosm
MIMAT0003199	rno-miR-381-3p	Mto1	300852	ENSRNOG00000037659	NA	NA	NA	predicted	15.6916	microcosm
MIMAT0003199	rno-miR-381-3p	LOC685680	685680	ENSRNOG00000022136	NA	NA	NA	predicted	15.6916	microcosm
MIMAT0003199	rno-miR-381-3p	Lrat	64047	ENSRNOG00000025608	NA	NA	NA	predicted	15.6916	microcosm
MIMAT0003199	rno-miR-381-3p	LOC691422	691422	ENSRNOG00000007076	NA	NA	NA	predicted	15.6916	microcosm
MIMAT0003199	rno-miR-381-3p	RGD1564722_predicted			NA	NA	NA	predicted	15.6916	microcosm
MIMAT0003199	rno-miR-381-3p	Hbq1b	100361053	ENSRNOG00000028114	NA	NA	NA	predicted	15.6916	microcosm
MIMAT0003199	rno-miR-381-3p	Kif15	353302	ENSRNOG00000025407	NA	NA	NA	predicted	15.6916	microcosm
MIMAT0003199	rno-miR-381-3p	Snrpf	680737	ENSRNOG00000005556	NA	NA	NA	predicted	15.6868	microcosm
MIMAT0003199	rno-miR-381-3p	Nol7	498727	ENSRNOG00000017904	NA	NA	NA	predicted	15.6834	microcosm
MIMAT0003199	rno-miR-381-3p	Xpnpep2	117522	ENSRNOG00000004009	NA	NA	NA	predicted	15.683	microcosm
MIMAT0003199	rno-miR-381-3p	Ap2a2	81637	ENSRNOG00000019534	NA	NA	NA	predicted	15.6796	microcosm
MIMAT0003199	rno-miR-381-3p	Enpp1	85496	ENSRNOG00000013994	NA	NA	NA	predicted	15.6785	microcosm
MIMAT0003199	rno-miR-381-3p	Zfp509_predicted			NA	NA	NA	predicted	15.669	microcosm
MIMAT0003199	rno-miR-381-3p	Egr2	114090	ENSRNOG00000000640	NA	NA	NA	predicted	-0.1057	miranda
MIMAT0003199	rno-miR-381-3p	Hnrnph1	140931	ENSRNOG00000003399	NA	NA	NA	predicted	-0.1064	miranda
MIMAT0003199	rno-miR-381-3p	Dnajc12	619393	ENSRNOG00000051960	NA	NA	NA	predicted	-0.1071	miranda
MIMAT0003199	rno-miR-381-3p	LOC100910526	171072	ENSRNOG00000040215	NA	NA	NA	predicted	-0.1074	miranda
MIMAT0003199	rno-miR-381-3p	RGD1562392	171072	ENSRNOG00000050885	NA	NA	NA	predicted	-0.1074	miranda
MIMAT0003199	rno-miR-381-3p	Havcr1	286934	ENSRNOG00000007243	NA	NA	NA	predicted	-0.1075	miranda
MIMAT0003199	rno-miR-381-3p	Spata6	171413	ENSRNOG00000007568	NA	NA	NA	predicted	-0.1079	miranda
MIMAT0003199	rno-miR-381-3p	Ar	24208	ENSRNOG00000005639	NA	NA	NA	predicted	-0.1081	miranda
MIMAT0003199	rno-miR-381-3p	MGC112830	361178	ENSRNOG00000019222	NA	NA	NA	predicted	-0.1081	miranda
MIMAT0003199	rno-miR-381-3p	Gria4	29629	ENSRNOG00000006957	NA	NA	NA	predicted	-0.1086	miranda
MIMAT0003199	rno-miR-381-3p	Clip1	65201	ENSRNOG00000001247	NA	NA	NA	predicted	-0.109	miranda
MIMAT0003199	rno-miR-381-3p	Calb1	83839	ENSRNOG00000007456	NA	NA	NA	predicted	-0.1091	miranda
MIMAT0003199	rno-miR-381-3p	Il23a	155140	ENSRNOG00000003254	NA	NA	NA	predicted	-0.1093	miranda
MIMAT0003199	rno-miR-381-3p	Arl1	64187	ENSRNOG00000005763	NA	NA	NA	predicted	-0.1098	miranda
MIMAT0003199	rno-miR-381-3p	Rarres1	310486	ENSRNOG00000037853	NA	NA	NA	predicted	-0.1101	miranda
MIMAT0003199	rno-miR-381-3p	Tfg	360709	ENSRNOG00000001633	NA	NA	NA	predicted	-0.1103	miranda
MIMAT0003199	rno-miR-381-3p	LOC102546978	360709	ENSRNOG00000001633	NA	NA	NA	predicted	-0.1103	miranda
MIMAT0003199	rno-miR-381-3p	Casp7	64026	ENSRNOG00000056216	NA	NA	NA	predicted	-0.1104	miranda
MIMAT0003199	rno-miR-381-3p	Arl6ip6	499798	ENSRNOG00000005074	NA	NA	NA	predicted	-0.1112	miranda
MIMAT0003199	rno-miR-381-3p	Agt	24179	ENSRNOG00000018445	NA	NA	NA	predicted	-0.1112	miranda
MIMAT0003199	rno-miR-381-3p	Hmox1	24451	ENSRNOG00000014117	NA	NA	NA	predicted	-0.1117	miranda
MIMAT0003199	rno-miR-381-3p	Ino80c	291737	ENSRNOG00000016532	NA	NA	NA	predicted	-0.112	miranda
MIMAT0003199	rno-miR-381-3p	Pex7	308718	ENSRNOG00000012322	NA	NA	NA	predicted	-0.1125	miranda
MIMAT0003199	rno-miR-381-3p	Acnat2	313220	ENSRNOG00000051912	NA	NA	NA	predicted	-0.1125	miranda
MIMAT0003199	rno-miR-381-3p	Notum	303743	ENSRNOG00000036680	NA	NA	NA	predicted	-0.1126	miranda
MIMAT0003199	rno-miR-381-3p	Gata2	25159	ENSRNOG00000012347	NA	NA	NA	predicted	-0.1129	miranda
MIMAT0003199	rno-miR-381-3p	Eif4e	117045	ENSRNOG00000052343	NA	NA	NA	predicted	-0.1131	miranda
MIMAT0003199	rno-miR-381-3p	Prl3b1	24283	ENSRNOG00000017185	NA	NA	NA	predicted	-0.1134	miranda
MIMAT0003199	rno-miR-381-3p	Ugt1a7c	154516	ENSRNOG00000018740	NA	NA	NA	predicted	-0.1136	miranda
MIMAT0003199	rno-miR-381-3p	Ugt1a2	154516	ENSRNOG00000018740	NA	NA	NA	predicted	-0.1136	miranda
MIMAT0003199	rno-miR-381-3p	Ugt1a6	113992	ENSRNOG00000018740	NA	NA	NA	predicted	-0.1136	miranda
MIMAT0003199	rno-miR-381-3p	Ugt1a1	113992	ENSRNOG00000018740	NA	NA	NA	predicted	-0.1136	miranda
MIMAT0003199	rno-miR-381-3p	Ugt1a5	113992	ENSRNOG00000018740	NA	NA	NA	predicted	-0.1136	miranda
MIMAT0003199	rno-miR-381-3p	Ugt1a8	24861	ENSRNOG00000018740	NA	NA	NA	predicted	-0.1136	miranda
MIMAT0003199	rno-miR-381-3p	Ugt1a3	24861	ENSRNOG00000018740	NA	NA	NA	predicted	-0.1136	miranda
MIMAT0003199	rno-miR-381-3p	Ugt1a9	24861	ENSRNOG00000018740	NA	NA	NA	predicted	-0.1136	miranda
MIMAT0003199	rno-miR-381-3p	Ccdc82	300359	ENSRNOG00000005713	NA	NA	NA	predicted	-0.1137	miranda
MIMAT0003199	rno-miR-381-3p	Chmp5	297995	ENSRNOG00000008672	NA	NA	NA	predicted	-0.1138	miranda
MIMAT0003199	rno-miR-381-3p	Ube2g1	64631	ENSRNOG00000010041	NA	NA	NA	predicted	-0.1142	miranda
MIMAT0003199	rno-miR-381-3p	Cldn8	304124	ENSRNOG00000001571	NA	NA	NA	predicted	-0.1144	miranda
MIMAT0003199	rno-miR-381-3p	Ppp1cc	24669	ENSRNOG00000001269	NA	NA	NA	predicted	-0.1148	miranda
MIMAT0003199	rno-miR-381-3p	Junb	24517	ENSRNOG00000042838	NA	NA	NA	predicted	-0.1149	miranda
MIMAT0003199	rno-miR-381-3p	Mapk9	50658	ENSRNOG00000002823	NA	NA	NA	predicted	-0.115	miranda
MIMAT0003199	rno-miR-381-3p	Dusp6	116663	ENSRNOG00000023896	NA	NA	NA	predicted	-0.115	miranda
MIMAT0003199	rno-miR-381-3p	Osgepl1	314548	ENSRNOG00000004001	NA	NA	NA	predicted	-0.1152	miranda
MIMAT0003199	rno-miR-381-3p	LOC100910478	311346	ENSRNOG00000048310	NA	NA	NA	predicted	-0.1155	miranda
MIMAT0003199	rno-miR-381-3p	Lrrc57	311346	ENSRNOG00000048310	NA	NA	NA	predicted	-0.1155	miranda
MIMAT0003199	rno-miR-381-3p	Chmp4c	361916	ENSRNOG00000010238	NA	NA	NA	predicted	-0.1159	miranda
MIMAT0003199	rno-miR-381-3p	Calcoco1	246047	ENSRNOG00000015447	NA	NA	NA	predicted	-0.1166	miranda
MIMAT0003199	rno-miR-381-3p	LOC100912282	246047	ENSRNOG00000015447	NA	NA	NA	predicted	-0.1166	miranda
MIMAT0003199	rno-miR-381-3p	Wif1	114557	ENSRNOG00000004476	NA	NA	NA	predicted	-0.1166	miranda
MIMAT0003199	rno-miR-381-3p	Rer1	298675	ENSRNOG00000014270	NA	NA	NA	predicted	-0.1168	miranda
MIMAT0003199	rno-miR-381-3p	Hnrnpa1	29578	ENSRNOG00000036839	NA	NA	NA	predicted	-0.1178	miranda
MIMAT0003199	rno-miR-381-3p	Nos2	24599	ENSRNOG00000049980	NA	NA	NA	predicted	-0.1179	miranda
MIMAT0003199	rno-miR-381-3p	Ces1d	113902	ENSRNOG00000015519	NA	NA	NA	predicted	-0.1179	miranda
MIMAT0003199	rno-miR-381-3p	Furin	54281	ENSRNOG00000011352	NA	NA	NA	predicted	-0.1182	miranda
MIMAT0003199	rno-miR-381-3p	Smgc	446171	ENSRNOG00000037025	NA	NA	NA	predicted	-0.1185	miranda
MIMAT0003199	rno-miR-381-3p	Zfp143	361627	ENSRNOG00000010087	NA	NA	NA	predicted	-0.1185	miranda
MIMAT0003199	rno-miR-381-3p	Ppm1a	24666	ENSRNOG00000005916	NA	NA	NA	predicted	-0.1186	miranda
MIMAT0003199	rno-miR-381-3p	Rcan1	266766	ENSRNOG00000001979	NA	NA	NA	predicted	-0.1187	miranda
MIMAT0003199	rno-miR-381-3p	Cox8c	360229	ENSRNOG00000031106	NA	NA	NA	predicted	-0.1192	miranda
MIMAT0003199	rno-miR-381-3p	Tmprss11g	289546	ENSRNOG00000029964	NA	NA	NA	predicted	-0.1194	miranda
MIMAT0003199	rno-miR-381-3p	Mtmr3	305482	ENSRNOG00000007120	NA	NA	NA	predicted	-0.1208	miranda
MIMAT0003199	rno-miR-381-3p	Il1rl2	171106	ENSRNOG00000014683	NA	NA	NA	predicted	-0.1209	miranda
MIMAT0003199	rno-miR-381-3p	Dck	79127	ENSRNOG00000003296	NA	NA	NA	predicted	-0.1209	miranda
MIMAT0003199	rno-miR-381-3p	MGC108823	307414	ENSRNOG00000019542	NA	NA	NA	predicted	-0.121	miranda
MIMAT0003199	rno-miR-381-3p	Mpdz	29365	ENSRNOG00000007894	NA	NA	NA	predicted	-0.1217	miranda
MIMAT0003199	rno-miR-381-3p	Hsd11b1	25116	ENSRNOG00000005861	NA	NA	NA	predicted	-0.1218	miranda
MIMAT0003199	rno-miR-381-3p	Snx10	297096	ENSRNOG00000011944	NA	NA	NA	predicted	-0.1218	miranda
MIMAT0003199	rno-miR-381-3p	Trip12	316575	ENSRNOG00000016963	NA	NA	NA	predicted	-0.1218	miranda
MIMAT0003199	rno-miR-381-3p	Idh1	24479	ENSRNOG00000015020	NA	NA	NA	predicted	-0.1218	miranda
MIMAT0003199	rno-miR-381-3p	Alcam	79559	ENSRNOG00000001989	NA	NA	NA	predicted	-0.1219	miranda
MIMAT0003199	rno-miR-381-3p	Hsbp1	286899	ENSRNOG00000014415	NA	NA	NA	predicted	-0.123	miranda
MIMAT0003199	rno-miR-381-3p	Agtr1b	81638	ENSRNOG00000010640	NA	NA	NA	predicted	-0.1235	miranda
MIMAT0003199	rno-miR-381-3p	Slc6a14	298340	ENSRNOG00000005687	NA	NA	NA	predicted	-0.1243	miranda
MIMAT0003199	rno-miR-381-3p	Dnajc7	303536	ENSRNOG00000017781	NA	NA	NA	predicted	-0.1249	miranda
MIMAT0003199	rno-miR-381-3p	Ei24	300514	ENSRNOG00000030391	NA	NA	NA	predicted	-0.125	miranda
MIMAT0003199	rno-miR-381-3p	LOC100909474	288031	ENSRNOG00000001728	NA	NA	NA	predicted	-0.1251	miranda
MIMAT0003199	rno-miR-381-3p	Fam43a	288031	ENSRNOG00000001728	NA	NA	NA	predicted	-0.1251	miranda
MIMAT0003199	rno-miR-381-3p	Btg4	315650	ENSRNOG00000011277	NA	NA	NA	predicted	-0.1252	miranda
MIMAT0003199	rno-miR-381-3p	Tmpo	25359	ENSRNOG00000008797	NA	NA	NA	predicted	-0.1256	miranda
MIMAT0003199	rno-miR-381-3p	Slc35g2	315957	ENSRNOG00000015370	NA	NA	NA	predicted	-0.1256	miranda
MIMAT0003199	rno-miR-381-3p	LOC100912195	501625	ENSRNOG00000033844	NA	NA	NA	predicted	-0.1259	miranda
MIMAT0003199	rno-miR-381-3p	Pcgf6	309457	ENSRNOG00000020250	NA	NA	NA	predicted	-0.1261	miranda
MIMAT0003199	rno-miR-381-3p	Rab21	299799	ENSRNOG00000003923	NA	NA	NA	predicted	-0.1267	miranda
MIMAT0003199	rno-miR-381-3p	Pax6	25509	ENSRNOG00000004410	NA	NA	NA	predicted	-0.1275	miranda
MIMAT0003199	rno-miR-381-3p	Tars	294810	ENSRNOG00000019023	NA	NA	NA	predicted	-0.1278	miranda
MIMAT0003199	rno-miR-381-3p	C6	24237	ENSRNOG00000024115	NA	NA	NA	predicted	-0.128	miranda
MIMAT0003199	rno-miR-381-3p	Spib	499146	ENSRNOG00000019660	NA	NA	NA	predicted	-0.1281	miranda
MIMAT0003199	rno-miR-381-3p	Cp	24268	ENSRNOG00000011913	NA	NA	NA	predicted	-0.1282	miranda
MIMAT0003199	rno-miR-381-3p	Grik1	29559	ENSRNOG00000001575	NA	NA	NA	predicted	-0.1282	miranda
MIMAT0003199	rno-miR-381-3p	Stat1	25124	ENSRNOG00000014079	NA	NA	NA	predicted	-0.1285	miranda
MIMAT0003199	rno-miR-381-3p	Mcoln2	292168	ENSRNOG00000015089	NA	NA	NA	predicted	-0.129	miranda
MIMAT0003199	rno-miR-381-3p	Blcap	171113	ENSRNOG00000024437	NA	NA	NA	predicted	-0.129	miranda
MIMAT0003199	rno-miR-381-3p	Nap1l2	317247		NA	NA	NA	predicted	-0.1291	miranda
MIMAT0003199	rno-miR-381-3p	Ube2v2	287927	ENSRNOG00000001829	NA	NA	NA	predicted	-0.1291	miranda
MIMAT0003199	rno-miR-381-3p	Fzd1	58868	ENSRNOG00000016242	NA	NA	NA	predicted	-0.1296	miranda
MIMAT0003199	rno-miR-381-3p	Cntn4	116658	ENSRNOG00000005652	NA	NA	NA	predicted	-0.1301	miranda
MIMAT0003199	rno-miR-381-3p	Reg3b	24618	ENSRNOG00000006151	NA	NA	NA	predicted	-0.1304	miranda
MIMAT0003199	rno-miR-381-3p	Rsrc2	360807	ENSRNOG00000001238	NA	NA	NA	predicted	-0.1305	miranda
MIMAT0003199	rno-miR-381-3p	Eml2	192360	ENSRNOG00000030127	NA	NA	NA	predicted	-0.1307	miranda
MIMAT0003199	rno-miR-381-3p	Ccdc17	500528	ENSRNOG00000023216	NA	NA	NA	predicted	-0.1307	miranda
MIMAT0003199	rno-miR-381-3p	Ms4a2	25316	ENSRNOG00000020993	NA	NA	NA	predicted	-0.1318	miranda
MIMAT0003199	rno-miR-381-3p	Ctsh	25425	ENSRNOG00000014064	NA	NA	NA	predicted	-0.1325	miranda
MIMAT0003199	rno-miR-381-3p	Arf4	79120	ENSRNOG00000012623	NA	NA	NA	predicted	-0.1327	miranda
MIMAT0003199	rno-miR-381-3p	Akap1	114124	ENSRNOG00000002373	NA	NA	NA	predicted	-0.1334	miranda
MIMAT0003199	rno-miR-381-3p	Ctgf	64032	ENSRNOG00000015036	NA	NA	NA	predicted	-0.1336	miranda
MIMAT0003199	rno-miR-381-3p	St3gal5	83505	ENSRNOG00000010284	NA	NA	NA	predicted	-0.1336	miranda
MIMAT0003199	rno-miR-381-3p	Arl5a	117050	ENSRNOG00000006839	NA	NA	NA	predicted	-0.1338	miranda
MIMAT0003199	rno-miR-381-3p	Rilpl2	288652	ENSRNOG00000001061	NA	NA	NA	predicted	-0.1351	miranda
MIMAT0003199	rno-miR-381-3p	Bad	64639	ENSRNOG00000021147	NA	NA	NA	predicted	-0.1351	miranda
MIMAT0003199	rno-miR-381-3p	LOC691960	60423	ENSRNOG00000028668	NA	NA	NA	predicted	-0.1353	miranda
MIMAT0003199	rno-miR-381-3p	Dnajc2	116456	ENSRNOG00000012392	NA	NA	NA	predicted	-0.1353	miranda
MIMAT0003199	rno-miR-381-3p	Slc28a2	60423	ENSRNOG00000028668	NA	NA	NA	predicted	-0.1353	miranda
MIMAT0003199	rno-miR-381-3p	Emc3	312640	ENSRNOG00000009934	NA	NA	NA	predicted	-0.1354	miranda
MIMAT0003199	rno-miR-381-3p	Prpf4b	291078	ENSRNOG00000016705	NA	NA	NA	predicted	-0.1354	miranda
MIMAT0003199	rno-miR-381-3p	Ssb	81783	ENSRNOG00000007998	NA	NA	NA	predicted	-0.1367	miranda
MIMAT0003199	rno-miR-381-3p	LOC680385	81783	ENSRNOG00000011606	NA	NA	NA	predicted	-0.1367	miranda
MIMAT0003199	rno-miR-381-3p	LOC100911295	360704	ENSRNOG00000048226	NA	NA	NA	predicted	-0.1368	miranda
MIMAT0003199	rno-miR-381-3p	LOC691642	360704	ENSRNOG00000048226	NA	NA	NA	predicted	-0.1368	miranda
MIMAT0003199	rno-miR-381-3p	Hmgn1	360704	ENSRNOG00000048226	NA	NA	NA	predicted	-0.1368	miranda
MIMAT0003199	rno-miR-381-3p	Slc16a10	170566	ENSRNOG00000000588	NA	NA	NA	predicted	-0.1377	miranda
MIMAT0003199	rno-miR-381-3p	Trhr	25570	ENSRNOG00000005048	NA	NA	NA	predicted	-0.1381	miranda
MIMAT0003199	rno-miR-381-3p	Ralyl	294883	ENSRNOG00000011400	NA	NA	NA	predicted	-0.1387	miranda
MIMAT0003199	rno-miR-381-3p	Twf1	315265	ENSRNOG00000022507	NA	NA	NA	predicted	-0.1388	miranda
MIMAT0003199	rno-miR-381-3p	Gfpt1	297417	ENSRNOG00000018507	NA	NA	NA	predicted	-0.1389	miranda
MIMAT0003199	rno-miR-381-3p	Ssx2ip	308023	ENSRNOG00000015425	NA	NA	NA	predicted	-0.139	miranda
MIMAT0003199	rno-miR-381-3p	Mcfd2	246117	ENSRNOG00000015059	NA	NA	NA	predicted	-0.1401	miranda
MIMAT0003199	rno-miR-381-3p	RGD1559786	298384	ENSRNOG00000012724	NA	NA	NA	predicted	-0.1405	miranda
MIMAT0003199	rno-miR-381-3p	Ube2b	81816	ENSRNOG00000005064	NA	NA	NA	predicted	-0.1406	miranda
MIMAT0003199	rno-miR-381-3p	Ugt8	50555	ENSRNOG00000009345	NA	NA	NA	predicted	-0.141	miranda
MIMAT0003199	rno-miR-381-3p	Tsc22d3	83514	ENSRNOG00000056135	NA	NA	NA	predicted	-0.1412	miranda
MIMAT0003199	rno-miR-381-3p	Armcx3	367902	ENSRNOG00000025730	NA	NA	NA	predicted	-0.1416	miranda
MIMAT0003199	rno-miR-381-3p	Pigq	287159	ENSRNOG00000020140	NA	NA	NA	predicted	-0.1431	miranda
MIMAT0003199	rno-miR-381-3p	Ccnb2	363088		NA	NA	NA	predicted	-0.1443	miranda
MIMAT0003199	rno-miR-381-3p	Rnf181	297337	ENSRNOG00000012035	NA	NA	NA	predicted	-0.1457	miranda
MIMAT0003199	rno-miR-381-3p	Polb	29240	ENSRNOG00000019150	NA	NA	NA	predicted	-0.1462	miranda
MIMAT0003199	rno-miR-381-3p	Larp1b	310348	ENSRNOG00000038366	NA	NA	NA	predicted	-0.1472	miranda
MIMAT0003199	rno-miR-381-3p	Cnot8	363603	ENSRNOG00000002630	NA	NA	NA	predicted	-0.1484	miranda
MIMAT0003199	rno-miR-381-3p	Ispd	493574	ENSRNOG00000006199	NA	NA	NA	predicted	-0.1487	miranda
MIMAT0003199	rno-miR-381-3p	Pld1	25096	ENSRNOG00000028156	NA	NA	NA	predicted	-0.1493	miranda
MIMAT0003199	rno-miR-381-3p	Hes6	316626	ENSRNOG00000020194	NA	NA	NA	predicted	-0.1497	miranda
MIMAT0003199	rno-miR-381-3p	Cth	24962	ENSRNOG00000010658	NA	NA	NA	predicted	-0.1497	miranda
MIMAT0003199	rno-miR-381-3p	Ptprn	116660	ENSRNOG00000019587	NA	NA	NA	predicted	-0.1508	miranda
MIMAT0003199	rno-miR-381-3p	Csn2	29173	ENSRNOG00000039326	NA	NA	NA	predicted	-0.1515	miranda
MIMAT0003199	rno-miR-381-3p	Il1r1	25663	ENSRNOG00000014504	NA	NA	NA	predicted	-0.154	miranda
MIMAT0003199	rno-miR-381-3p	Smim14	364154	ENSRNOG00000002553	NA	NA	NA	predicted	-0.1548	miranda
MIMAT0003199	rno-miR-381-3p	Zfp64	311661	ENSRNOG00000012762	NA	NA	NA	predicted	-0.1552	miranda
MIMAT0003199	rno-miR-381-3p	Epcam	171577	ENSRNOG00000015667	NA	NA	NA	predicted	-0.1557	miranda
MIMAT0003199	rno-miR-381-3p	Cxcl11	305236	ENSRNOG00000022298	NA	NA	NA	predicted	-0.1567	miranda
MIMAT0003199	rno-miR-381-3p	G4	406868	ENSRNOG00000039658	NA	NA	NA	predicted	-0.1572	miranda
MIMAT0003199	rno-miR-381-3p	Maged1	84469	ENSRNOG00000006756	NA	NA	NA	predicted	-0.1576	miranda
MIMAT0003199	rno-miR-381-3p	Nupl1	245922	ENSRNOG00000012644	NA	NA	NA	predicted	-0.1578	miranda
MIMAT0003199	rno-miR-381-3p	Pitx1	113983	ENSRNOG00000011423	NA	NA	NA	predicted	-0.1581	miranda
MIMAT0003199	rno-miR-381-3p	Serinc1	294421	ENSRNOG00000029360	NA	NA	NA	predicted	-0.1591	miranda
MIMAT0003199	rno-miR-381-3p	Xrcc4	309995	ENSRNOG00000029966	NA	NA	NA	predicted	-0.1591	miranda
MIMAT0003199	rno-miR-381-3p	Svs3a	192239	ENSRNOG00000048418	NA	NA	NA	predicted	-0.1601	miranda
MIMAT0003199	rno-miR-381-3p	LOC100909631	192239	ENSRNOG00000048418	NA	NA	NA	predicted	-0.1601	miranda
MIMAT0003199	rno-miR-381-3p	Cmtm8	301045	ENSRNOG00000011201	NA	NA	NA	predicted	-0.1608	miranda
MIMAT0003199	rno-miR-381-3p	Tmem55b	364298	ENSRNOG00000009948	NA	NA	NA	predicted	-0.1611	miranda
MIMAT0003199	rno-miR-381-3p	Casp6	83584	ENSRNOG00000009508	NA	NA	NA	predicted	-0.1612	miranda
MIMAT0003199	rno-miR-381-3p	Tram1	312903	ENSRNOG00000007892	NA	NA	NA	predicted	-0.1613	miranda
MIMAT0003199	rno-miR-381-3p	Arf1	64310	ENSRNOG00000060229	NA	NA	NA	predicted	-0.1618	miranda
MIMAT0003199	rno-miR-381-3p	Yipf6	363476	ENSRNOG00000006642	NA	NA	NA	predicted	-0.1621	miranda
MIMAT0003199	rno-miR-381-3p	Ctbp1	29382	ENSRNOG00000005428	NA	NA	NA	predicted	-0.1625	miranda
MIMAT0003199	rno-miR-381-3p	Pfkfb2	24640	ENSRNOG00000004162	NA	NA	NA	predicted	-0.1627	miranda
MIMAT0003199	rno-miR-381-3p	Cnksr2	59322	ENSRNOG00000007014	NA	NA	NA	predicted	-0.163	miranda
MIMAT0003199	rno-miR-381-3p	Dync1i2	116659	ENSRNOG00000009781	NA	NA	NA	predicted	-0.1634	miranda
MIMAT0003199	rno-miR-381-3p	Bicd2	306809	ENSRNOG00000016031	NA	NA	NA	predicted	-0.1635	miranda
MIMAT0003199	rno-miR-381-3p	Olr35	293140		NA	NA	NA	predicted	-0.1637	miranda
MIMAT0003199	rno-miR-381-3p	Taf11	309638	ENSRNOG00000024601	NA	NA	NA	predicted	-0.165	miranda
MIMAT0003199	rno-miR-381-3p	Hn1l	360492	ENSRNOG00000024661	NA	NA	NA	predicted	-0.1657	miranda
MIMAT0003199	rno-miR-381-3p	Slc16a13	287451	ENSRNOG00000018785	NA	NA	NA	predicted	-0.1664	miranda
MIMAT0003199	rno-miR-381-3p	RGD1304978	295985	ENSRNOG00000004926	NA	NA	NA	predicted	-0.167	miranda
MIMAT0003199	rno-miR-381-3p	Anxa11	290527	ENSRNOG00000010984	NA	NA	NA	predicted	-0.1672	miranda
MIMAT0003199	rno-miR-381-3p	LOC100363782	81754	ENSRNOG00000050510	NA	NA	NA	predicted	-0.168	miranda
MIMAT0003199	rno-miR-381-3p	Rab1b	81754	ENSRNOG00000050510	NA	NA	NA	predicted	-0.168	miranda
MIMAT0003199	rno-miR-381-3p	LOC102555167	81754	ENSRNOG00000050510	NA	NA	NA	predicted	-0.168	miranda
MIMAT0003199	rno-miR-381-3p	Lpar3	66025	ENSRNOG00000015260	NA	NA	NA	predicted	-0.1684	miranda
MIMAT0003199	rno-miR-381-3p	Dut	497778	ENSRNOG00000007221	NA	NA	NA	predicted	-0.17	miranda
MIMAT0003199	rno-miR-381-3p	Tesk2	170908	ENSRNOG00000017282	NA	NA	NA	predicted	-0.1708	miranda
MIMAT0003199	rno-miR-381-3p	Nxph1	25501	ENSRNOG00000008939	NA	NA	NA	predicted	-0.1717	miranda
MIMAT0003199	rno-miR-381-3p	Pgrmc1	291948		NA	NA	NA	predicted	-0.1726	miranda
MIMAT0003199	rno-miR-381-3p	Cdc123	116656	ENSRNOG00000017770	NA	NA	NA	predicted	-0.1734	miranda
MIMAT0003199	rno-miR-381-3p	Stk39	54348	ENSRNOG00000024808	NA	NA	NA	predicted	-0.1744	miranda
MIMAT0003199	rno-miR-381-3p	Cdo1	81718	ENSRNOG00000000158	NA	NA	NA	predicted	-0.1746	miranda
MIMAT0003199	rno-miR-381-3p	Adm	25026	ENSRNOG00000027030	NA	NA	NA	predicted	-0.1751	miranda
MIMAT0003199	rno-miR-381-3p	Copb1	114023	ENSRNOG00000057623	NA	NA	NA	predicted	-0.1753	miranda
MIMAT0003199	rno-miR-381-3p	Fcgr3a	304966	ENSRNOG00000024382	NA	NA	NA	predicted	-0.1756	miranda
MIMAT0003199	rno-miR-381-3p	Fmc1	500087	ENSRNOG00000005618	NA	NA	NA	predicted	-0.1758	miranda
MIMAT0003199	rno-miR-381-3p	Pitpnb	114561	ENSRNOG00000000665	NA	NA	NA	predicted	-0.1761	miranda
MIMAT0003199	rno-miR-381-3p	Lrp2bp	290753	ENSRNOG00000011178	NA	NA	NA	predicted	-0.1765	miranda
MIMAT0003199	rno-miR-381-3p	Set	307947	ENSRNOG00000034241	NA	NA	NA	predicted	-0.1766	miranda
MIMAT0003199	rno-miR-381-3p	Gpr85	64020	ENSRNOG00000024636	NA	NA	NA	predicted	-0.1767	miranda
MIMAT0003199	rno-miR-381-3p	Prl7a4	306929	ENSRNOG00000029126	NA	NA	NA	predicted	-0.1769	miranda
MIMAT0003199	rno-miR-381-3p	Nnt	310378	ENSRNOG00000026842	NA	NA	NA	predicted	-0.177	miranda
MIMAT0003199	rno-miR-381-3p	Fam110c	500638	ENSRNOG00000005660	NA	NA	NA	predicted	-0.1796	miranda
MIMAT0003199	rno-miR-381-3p	Sike1	362007	ENSRNOG00000017502	NA	NA	NA	predicted	-0.1797	miranda
MIMAT0003199	rno-miR-381-3p	Slc26a3	114629	ENSRNOG00000006878	NA	NA	NA	predicted	-0.1808	miranda
MIMAT0003199	rno-miR-381-3p	Acsm4	353317	ENSRNOG00000014726	NA	NA	NA	predicted	-0.1813	miranda
MIMAT0003199	rno-miR-381-3p	Nr2c2	50659	ENSRNOG00000010536	NA	NA	NA	predicted	-0.1815	miranda
MIMAT0003199	rno-miR-381-3p	Txnip	117514	ENSRNOG00000021201	NA	NA	NA	predicted	-0.1821	miranda
MIMAT0003199	rno-miR-381-3p	Vps37a	290775	ENSRNOG00000012001	NA	NA	NA	predicted	-0.1828	miranda
MIMAT0003199	rno-miR-381-3p	Wsb1	303336	ENSRNOG00000012929	NA	NA	NA	predicted	-0.183	miranda
MIMAT0003199	rno-miR-381-3p	Rab28	117049	ENSRNOG00000017074	NA	NA	NA	predicted	-0.1832	miranda
MIMAT0003199	rno-miR-381-3p	Pllp	64364	ENSRNOG00000016558	NA	NA	NA	predicted	-0.1844	miranda
MIMAT0003199	rno-miR-381-3p	Sft2d1	292305	ENSRNOG00000024140	NA	NA	NA	predicted	-0.1845	miranda
MIMAT0003199	rno-miR-381-3p	Calml3	307100	ENSRNOG00000031955	NA	NA	NA	predicted	-0.1847	miranda
MIMAT0003199	rno-miR-381-3p	Syap1	302678	ENSRNOG00000004304	NA	NA	NA	predicted	-0.1848	miranda
MIMAT0003199	rno-miR-381-3p	Pianp	312711	ENSRNOG00000017052	NA	NA	NA	predicted	-0.1858	miranda
MIMAT0003199	rno-miR-381-3p	Slc12a1	25065	ENSRNOG00000005367	NA	NA	NA	predicted	-0.1859	miranda
MIMAT0003199	rno-miR-381-3p	Myocd	246297	ENSRNOG00000003669	NA	NA	NA	predicted	-0.1864	miranda
MIMAT0003199	rno-miR-381-3p	Bcas1	246755	ENSRNOG00000012906	NA	NA	NA	predicted	-0.1883	miranda
MIMAT0003199	rno-miR-381-3p	Il15	25670	ENSRNOG00000003439	NA	NA	NA	predicted	-0.1883	miranda
MIMAT0003199	rno-miR-381-3p	Nup107	116555	ENSRNOG00000006541	NA	NA	NA	predicted	-0.1895	miranda
MIMAT0003199	rno-miR-381-3p	Smad5	59328	ENSRNOG00000022870	NA	NA	NA	predicted	-0.1901	miranda
MIMAT0003199	rno-miR-381-3p	Cdadc1	361052	ENSRNOG00000012209	NA	NA	NA	predicted	-0.1914	miranda
MIMAT0003199	rno-miR-381-3p	Ccdc51	316008	ENSRNOG00000020688	NA	NA	NA	predicted	-0.1916	miranda
MIMAT0003199	rno-miR-381-3p	Hnrnpc	290046	ENSRNOG00000050800	NA	NA	NA	predicted	-0.1935	miranda
MIMAT0003199	rno-miR-381-3p	LOC100911576	290046	ENSRNOG00000011621	NA	NA	NA	predicted	-0.1935	miranda
MIMAT0003199	rno-miR-381-3p	Dbn1	81653	ENSRNOG00000014170	NA	NA	NA	predicted	-0.1936	miranda
MIMAT0003199	rno-miR-381-3p	Fam126b	316415	ENSRNOG00000025079	NA	NA	NA	predicted	-0.1936	miranda
MIMAT0003199	rno-miR-381-3p	Prkar1b	25521	ENSRNOG00000028733	NA	NA	NA	predicted	-0.1945	miranda
MIMAT0003199	rno-miR-381-3p	Cx3cl1	89808	ENSRNOG00000016326	NA	NA	NA	predicted	-0.1962	miranda
MIMAT0003199	rno-miR-381-3p	Snupn	316108	ENSRNOG00000005426	NA	NA	NA	predicted	-0.1968	miranda
MIMAT0003199	rno-miR-381-3p	Apoc1	25292	ENSRNOG00000018426	NA	NA	NA	predicted	-0.1982	miranda
MIMAT0003199	rno-miR-381-3p	B4galt6	65196	ENSRNOG00000015895	NA	NA	NA	predicted	-0.1989	miranda
MIMAT0003199	rno-miR-381-3p	LOC499306	499306	ENSRNOG00000054336	NA	NA	NA	predicted	-0.1992	miranda
MIMAT0003199	rno-miR-381-3p	Dtwd1	296119	ENSRNOG00000009593	NA	NA	NA	predicted	-0.203	miranda
MIMAT0003199	rno-miR-381-3p	Pja2	192256	ENSRNOG00000015528	NA	NA	NA	predicted	-0.2033	miranda
MIMAT0003199	rno-miR-381-3p	Abcc5	116721	ENSRNOG00000029178	NA	NA	NA	predicted	-0.204	miranda
MIMAT0003199	rno-miR-381-3p	Dynll1	58945	ENSRNOG00000011222	NA	NA	NA	predicted	-0.2054	miranda
MIMAT0003199	rno-miR-381-3p	Insig2	288985	ENSRNOG00000002478	NA	NA	NA	predicted	-0.2075	miranda
MIMAT0003199	rno-miR-381-3p	Nup210	58958	ENSRNOG00000005390	NA	NA	NA	predicted	-0.2102	miranda
MIMAT0003199	rno-miR-381-3p	Ndn	308690	ENSRNOG00000010146	NA	NA	NA	predicted	-0.2105	miranda
MIMAT0003199	rno-miR-381-3p	Cops2	261736	ENSRNOG00000008744	NA	NA	NA	predicted	-0.2136	miranda
MIMAT0003199	rno-miR-381-3p	Fut7	296564	ENSRNOG00000014156	NA	NA	NA	predicted	-0.2152	miranda
MIMAT0003199	rno-miR-381-3p	Ambn	25376	ENSRNOG00000003718	NA	NA	NA	predicted	-0.2153	miranda
MIMAT0003199	rno-miR-381-3p	Dnajc5g	366567	ENSRNOG00000026578	NA	NA	NA	predicted	-0.2156	miranda
MIMAT0003199	rno-miR-381-3p	Pttg1	64193	ENSRNOG00000003802	NA	NA	NA	predicted	-0.219	miranda
MIMAT0003199	rno-miR-381-3p	Nup93	291874	ENSRNOG00000018564	NA	NA	NA	predicted	-0.219	miranda
MIMAT0003199	rno-miR-381-3p	Rap1b	171337	ENSRNOG00000007048	NA	NA	NA	predicted	-0.2202	miranda
MIMAT0003199	rno-miR-381-3p	Ermn	295619	ENSRNOG00000021472	NA	NA	NA	predicted	-0.2233	miranda
MIMAT0003199	rno-miR-381-3p	Lgals8	116641	ENSRNOG00000018046	NA	NA	NA	predicted	-0.2242	miranda
MIMAT0003199	rno-miR-381-3p	Ptbp3	83515	ENSRNOG00000016334	NA	NA	NA	predicted	-0.2273	miranda
MIMAT0003199	rno-miR-381-3p	Abcg3l2	360910		NA	NA	NA	predicted	-0.2278	miranda
MIMAT0003199	rno-miR-381-3p	Akap6	64553	ENSRNOG00000004841	NA	NA	NA	predicted	-0.2324	miranda
MIMAT0003199	rno-miR-381-3p	Iapp	24476	ENSRNOG00000012417	NA	NA	NA	predicted	-0.2354	miranda
MIMAT0003199	rno-miR-381-3p	Vcpip1	286761	ENSRNOG00000006980	NA	NA	NA	predicted	-0.2412	miranda
MIMAT0003199	rno-miR-381-3p	Gnl3	290556	ENSRNOG00000028461	NA	NA	NA	predicted	-0.2421	miranda
MIMAT0003199	rno-miR-381-3p	Tyms	29261	ENSRNOG00000037225	NA	NA	NA	predicted	-0.2451	miranda
MIMAT0003199	rno-miR-381-3p	Arntl	29657	ENSRNOG00000014448	NA	NA	NA	predicted	-0.2488	miranda
MIMAT0003199	rno-miR-381-3p	Col11a2	294279	ENSRNOG00000000463	NA	NA	NA	predicted	-0.2496	miranda
MIMAT0003199	rno-miR-381-3p	Smpx	84416	ENSRNOG00000007495	NA	NA	NA	predicted	-0.2512	miranda
MIMAT0003199	rno-miR-381-3p	Gabbr1	81657	ENSRNOG00000000774	NA	NA	NA	predicted	-0.2518	miranda
MIMAT0003199	rno-miR-381-3p	Ythdc1	170956	ENSRNOG00000001996	NA	NA	NA	predicted	-0.2528	miranda
MIMAT0003199	rno-miR-381-3p	Idh3a	114096	ENSRNOG00000010277	NA	NA	NA	predicted	-0.2535	miranda
MIMAT0003199	rno-miR-381-3p	LOC100360124	305806	ENSRNOG00000039782	NA	NA	NA	predicted	-0.2535	miranda
MIMAT0003199	rno-miR-381-3p	LOC305806	305806	ENSRNOG00000039782	NA	NA	NA	predicted	-0.2535	miranda
MIMAT0003199	rno-miR-381-3p	LOC100359853	305806	ENSRNOG00000039782	NA	NA	NA	predicted	-0.2535	miranda
MIMAT0003199	rno-miR-381-3p	Gdf10	79216	ENSRNOG00000051993	NA	NA	NA	predicted	-0.2549	miranda
MIMAT0003199	rno-miR-381-3p	Ccl20	29538	ENSRNOG00000015992	NA	NA	NA	predicted	-0.2555	miranda
MIMAT0003199	rno-miR-381-3p	Ube2i	25573	ENSRNOG00000017907	NA	NA	NA	predicted	-0.2564	miranda
MIMAT0003199	rno-miR-381-3p	Sycp1	25276	ENSRNOG00000016835	NA	NA	NA	predicted	-0.2566	miranda
MIMAT0003199	rno-miR-381-3p	Bet1l	54400	ENSRNOG00000013165	NA	NA	NA	predicted	-0.2577	miranda
MIMAT0003199	rno-miR-381-3p	Tpd52l2	296480	ENSRNOG00000015122	NA	NA	NA	predicted	-0.2587	miranda
MIMAT0003199	rno-miR-381-3p	Ccnjl	303059	ENSRNOG00000003893	NA	NA	NA	predicted	-0.2593	miranda
MIMAT0003199	rno-miR-381-3p	Ahrr	498999	ENSRNOG00000014721	NA	NA	NA	predicted	-0.26	miranda
MIMAT0003199	rno-miR-381-3p	Smad3	29357	ENSRNOG00000008620	NA	NA	NA	predicted	-0.2603	miranda
MIMAT0003199	rno-miR-381-3p	Tti2	290811	ENSRNOG00000023494	NA	NA	NA	predicted	-0.261	miranda
MIMAT0003199	rno-miR-381-3p	Thra	81812	ENSRNOG00000009066	NA	NA	NA	predicted	-0.2611	miranda
MIMAT0003199	rno-miR-381-3p	Herpud1	85430	ENSRNOG00000018796	NA	NA	NA	predicted	-0.262	miranda
MIMAT0003199	rno-miR-381-3p	Klre1	297645	ENSRNOG00000007961	NA	NA	NA	predicted	-0.2633	miranda
MIMAT0003199	rno-miR-381-3p	Nr2f1	81808	ENSRNOG00000014795	NA	NA	NA	predicted	-0.2647	miranda
MIMAT0003199	rno-miR-381-3p	Sdc4	24771	ENSRNOG00000014297	NA	NA	NA	predicted	-0.2671	miranda
MIMAT0003199	rno-miR-381-3p	Ik	291659	ENSRNOG00000017251	NA	NA	NA	predicted	-0.2676	miranda
MIMAT0003199	rno-miR-381-3p	Gpbp1l1	313519	ENSRNOG00000037595	NA	NA	NA	predicted	-0.269	miranda
MIMAT0003199	rno-miR-381-3p	LOC100911515	24849	ENSRNOG00000050669	NA	NA	NA	predicted	-0.2727	miranda
MIMAT0003199	rno-miR-381-3p	Sh2b3	58838	ENSRNOG00000028198	NA	NA	NA	predicted	-0.2729	miranda
MIMAT0003199	rno-miR-381-3p	Fut4	60670	ENSRNOG00000009157	NA	NA	NA	predicted	-0.274	miranda
MIMAT0003199	rno-miR-381-3p	Sdhc	289217	ENSRNOG00000003163	NA	NA	NA	predicted	-0.2741	miranda
MIMAT0003199	rno-miR-381-3p	Pla2g4a	24653	ENSRNOG00000002657	NA	NA	NA	predicted	-0.2752	miranda
MIMAT0003199	rno-miR-381-3p	B3galnt1	310508	ENSRNOG00000012019	NA	NA	NA	predicted	-0.2767	miranda
MIMAT0003199	rno-miR-381-3p	LOC365791	365791	ENSRNOG00000038242	NA	NA	NA	predicted	-0.2777	miranda
MIMAT0003199	rno-miR-381-3p	Hyal3	300993	ENSRNOG00000016093	NA	NA	NA	predicted	-0.2784	miranda
MIMAT0003199	rno-miR-381-3p	Slc25a25	246771	ENSRNOG00000014338	NA	NA	NA	predicted	-0.2786	miranda
MIMAT0003199	rno-miR-381-3p	Cd200	24560	ENSRNOG00000002141	NA	NA	NA	predicted	-0.2792	miranda
MIMAT0003199	rno-miR-381-3p	Gemin6	362688	ENSRNOG00000027332	NA	NA	NA	predicted	-0.28	miranda
MIMAT0003199	rno-miR-381-3p	Matr3	29150	ENSRNOG00000019875	NA	NA	NA	predicted	-0.285	miranda
MIMAT0003199	rno-miR-381-3p	Pcyox1	246302	ENSRNOG00000016704	NA	NA	NA	predicted	-0.2899	miranda
MIMAT0003199	rno-miR-381-3p	Mtfmt	315763	ENSRNOG00000014602	NA	NA	NA	predicted	-0.2906	miranda
MIMAT0003199	rno-miR-381-3p	Ttc4	362556	ENSRNOG00000042467	NA	NA	NA	predicted	-0.2907	miranda
MIMAT0003199	rno-miR-381-3p	Kitlg	60427	ENSRNOG00000005386	NA	NA	NA	predicted	-0.2923	miranda
MIMAT0003199	rno-miR-381-3p	Slc25a4	85333	ENSRNOG00000010830	NA	NA	NA	predicted	-0.2927	miranda
MIMAT0003199	rno-miR-381-3p	Trdn	59299	ENSRNOG00000012609	NA	NA	NA	predicted	-0.2954	miranda
MIMAT0003199	rno-miR-381-3p	Spz1	499510	ENSRNOG00000013050	NA	NA	NA	predicted	-0.2983	miranda
MIMAT0003199	rno-miR-381-3p	Ypel5	298792	ENSRNOG00000026742	NA	NA	NA	predicted	-0.3004	miranda
MIMAT0003199	rno-miR-381-3p	Crh	81648	ENSRNOG00000012703	NA	NA	NA	predicted	-0.3012	miranda
MIMAT0003199	rno-miR-381-3p	Ppp2ca	24672	ENSRNOG00000005389	NA	NA	NA	predicted	-0.3061	miranda
MIMAT0003199	rno-miR-381-3p	Nudc	29648	ENSRNOG00000051720	NA	NA	NA	predicted	-0.307	miranda
MIMAT0003199	rno-miR-381-3p	Hr	60563	ENSRNOG00000011427	NA	NA	NA	predicted	-0.3116	miranda
MIMAT0003199	rno-miR-381-3p	Decr2	64461	ENSRNOG00000050424	NA	NA	NA	predicted	-0.3133	miranda
MIMAT0003199	rno-miR-381-3p	Atp2b1	29598	ENSRNOG00000004026	NA	NA	NA	predicted	-0.3134	miranda
MIMAT0003199	rno-miR-381-3p	Stxbp1	25558	ENSRNOG00000015420	NA	NA	NA	predicted	-0.3158	miranda
MIMAT0003199	rno-miR-381-3p	Cep83	366872	ENSRNOG00000007859	NA	NA	NA	predicted	-0.3187	miranda
MIMAT0003199	rno-miR-381-3p	Vamp2	24803	ENSRNOG00000006989	NA	NA	NA	predicted	-0.3205	miranda
MIMAT0003199	rno-miR-381-3p	LOC298139	298139	ENSRNOG00000045733	NA	NA	NA	predicted	-0.3215	miranda
MIMAT0003199	rno-miR-381-3p	Casp9	58918	ENSRNOG00000012944	NA	NA	NA	predicted	-0.3241	miranda
MIMAT0003199	rno-miR-381-3p	Cgrrf1	116679	ENSRNOG00000010178	NA	NA	NA	predicted	-0.3241	miranda
MIMAT0003199	rno-miR-381-3p	MGC95210	287798	ENSRNOG00000024780	NA	NA	NA	predicted	-0.3247	miranda
MIMAT0003199	rno-miR-381-3p	Hpca	29177	ENSRNOG00000006979	NA	NA	NA	predicted	-0.3251	miranda
MIMAT0003199	rno-miR-381-3p	Lca5	300866	ENSRNOG00000009580	NA	NA	NA	predicted	-0.3252	miranda
MIMAT0003199	rno-miR-381-3p	Cyp26a1	154985	ENSRNOG00000016750	NA	NA	NA	predicted	-0.3258	miranda
MIMAT0003199	rno-miR-381-3p	Tmem110	361110	ENSRNOG00000017051	NA	NA	NA	predicted	-0.3276	miranda
MIMAT0003199	rno-miR-381-3p	Yipf4	362699	ENSRNOG00000005610	NA	NA	NA	predicted	-0.3327	miranda
MIMAT0003199	rno-miR-381-3p	Sub1	192269	ENSRNOG00000050563	NA	NA	NA	predicted	-0.334	miranda
MIMAT0003199	rno-miR-381-3p	Penk	29237	ENSRNOG00000008943	NA	NA	NA	predicted	-0.3345	miranda
MIMAT0003199	rno-miR-381-3p	Slco6d1	367321	ENSRNOG00000031146	NA	NA	NA	predicted	-0.3351	miranda
MIMAT0003199	rno-miR-381-3p	Kcna3	29731	ENSRNOG00000018116	NA	NA	NA	predicted	-0.3379	miranda
MIMAT0003199	rno-miR-381-3p	Ywhaz	25578	ENSRNOG00000008195	NA	NA	NA	predicted	-0.3384	miranda
MIMAT0003199	rno-miR-381-3p	Zcchc9	309986	ENSRNOG00000051682	NA	NA	NA	predicted	-0.3416	miranda
MIMAT0003199	rno-miR-381-3p	P2rx5	113995	ENSRNOG00000019208	NA	NA	NA	predicted	-0.3442	miranda
MIMAT0003199	rno-miR-381-3p	Ltv1	361452	ENSRNOG00000015217	NA	NA	NA	predicted	-0.345	miranda
MIMAT0003199	rno-miR-381-3p	Mbd1	291439	ENSRNOG00000024104	NA	NA	NA	predicted	-0.3476	miranda
MIMAT0003199	rno-miR-381-3p	Rassf4	362423	ENSRNOG00000013526	NA	NA	NA	predicted	-0.3497	miranda
MIMAT0003199	rno-miR-381-3p	Ncf1	114553	ENSRNOG00000001480	NA	NA	NA	predicted	-0.3512	miranda
MIMAT0003199	rno-miR-381-3p	Ptma	29222	ENSRNOG00000018584	NA	NA	NA	predicted	-0.3606	miranda
MIMAT0003199	rno-miR-381-3p	Prl8a4	59088	ENSRNOG00000016803	NA	NA	NA	predicted	-0.361	miranda
MIMAT0003199	rno-miR-381-3p	Hps1	114638	ENSRNOG00000045838	NA	NA	NA	predicted	-0.3611	miranda
MIMAT0003199	rno-miR-381-3p	Pspc1	305910	ENSRNOG00000020782	NA	NA	NA	predicted	-0.3618	miranda
MIMAT0003199	rno-miR-381-3p	Slc9a3	24784	ENSRNOG00000015159	NA	NA	NA	predicted	-0.3662	miranda
MIMAT0003199	rno-miR-381-3p	Rcn2	29218	ENSRNOG00000015780	NA	NA	NA	predicted	-0.3666	miranda
MIMAT0003199	rno-miR-381-3p	Itpr1	25262	ENSRNOG00000007104	NA	NA	NA	predicted	-0.3672	miranda
MIMAT0003199	rno-miR-381-3p	Tmem199	303332	ENSRNOG00000009896	NA	NA	NA	predicted	-0.37	miranda
MIMAT0003199	rno-miR-381-3p	Foxg1	24370	ENSRNOG00000047891	NA	NA	NA	predicted	-0.378	miranda
MIMAT0003199	rno-miR-381-3p	Picalm	89816	ENSRNOG00000018322	NA	NA	NA	predicted	-0.3808	miranda
MIMAT0003199	rno-miR-381-3p	Fli1	315532	ENSRNOG00000008904	NA	NA	NA	predicted	-0.3816	miranda
MIMAT0003199	rno-miR-381-3p	Mapk6	58840	ENSRNOG00000009381	NA	NA	NA	predicted	-0.3836	miranda
MIMAT0003199	rno-miR-381-3p	LOC100910384	353303	ENSRNOG00000003349	NA	NA	NA	predicted	-0.3865	miranda
MIMAT0003199	rno-miR-381-3p	Col23a1	353303	ENSRNOG00000003349	NA	NA	NA	predicted	-0.3865	miranda
MIMAT0003199	rno-miR-381-3p	Cct4	29374	ENSRNOG00000009642	NA	NA	NA	predicted	-0.3873	miranda
MIMAT0003199	rno-miR-381-3p	Adam7	29641	ENSRNOG00000014054	NA	NA	NA	predicted	-0.3878	miranda
MIMAT0003199	rno-miR-381-3p	Brd2	294276	ENSRNOG00000045877	NA	NA	NA	predicted	-0.3881	miranda
MIMAT0003199	rno-miR-381-3p	LOC100909544	294276	ENSRNOG00000045877	NA	NA	NA	predicted	-0.3881	miranda
MIMAT0003199	rno-miR-381-3p	Aqp1	25240	ENSRNOG00000011648	NA	NA	NA	predicted	-0.389	miranda
MIMAT0003199	rno-miR-381-3p	Plagl1	25157	ENSRNOG00000025587	NA	NA	NA	predicted	-0.3903	miranda
MIMAT0003199	rno-miR-381-3p	Ccnl1	114121	ENSRNOG00000011586	NA	NA	NA	predicted	-0.3916	miranda
MIMAT0003199	rno-miR-381-3p	Gosr1	94189	ENSRNOG00000003971	NA	NA	NA	predicted	-0.4001	miranda
MIMAT0003199	rno-miR-381-3p	Myst2	303470		NA	NA	NA	predicted	-0.4018	miranda
MIMAT0003199	rno-miR-381-3p	Tmlhe	170898	ENSRNOG00000000729	NA	NA	NA	predicted	-0.4069	miranda
MIMAT0003199	rno-miR-381-3p	Dynlt3	363448	ENSRNOG00000003611	NA	NA	NA	predicted	-0.4073	miranda
MIMAT0003199	rno-miR-381-3p	LOC100911485	64476	ENSRNOG00000046447	NA	NA	NA	predicted	-0.409	miranda
MIMAT0003199	rno-miR-381-3p	Shank2	171093	ENSRNOG00000050206	NA	NA	NA	predicted	-0.409	miranda
MIMAT0003199	rno-miR-381-3p	Mfn2	64476	ENSRNOG00000046447	NA	NA	NA	predicted	-0.409	miranda
MIMAT0003199	rno-miR-381-3p	Clca5	362052	ENSRNOG00000013334	NA	NA	NA	predicted	-0.4104	miranda
MIMAT0003199	rno-miR-381-3p	Lcp2	155918	ENSRNOG00000005620	NA	NA	NA	predicted	-0.4129	miranda
MIMAT0003199	rno-miR-381-3p	Dab2ip	192126	ENSRNOG00000055226	NA	NA	NA	predicted	-0.4142	miranda
MIMAT0003199	rno-miR-381-3p	Clrn3	309082	ENSRNOG00000028288	NA	NA	NA	predicted	-0.4157	miranda
MIMAT0003199	rno-miR-381-3p	Scn2a1	24766		NA	NA	NA	predicted	-0.4158	miranda
MIMAT0003199	rno-miR-381-3p	Hspd1	63868	ENSRNOG00000014525	NA	NA	NA	predicted	-0.4201	miranda
MIMAT0003199	rno-miR-381-3p	Txlng	302680	ENSRNOG00000004971	NA	NA	NA	predicted	-0.4274	miranda
MIMAT0003199	rno-miR-381-3p	Cited2	114490	ENSRNOG00000056940	NA	NA	NA	predicted	-0.4372	miranda
MIMAT0003199	rno-miR-381-3p	Cxadr	89843	ENSRNOG00000001557	NA	NA	NA	predicted	-0.4552	miranda
MIMAT0003199	rno-miR-381-3p	Kcnc3	117101	ENSRNOG00000019959	NA	NA	NA	predicted	-0.4611	miranda
MIMAT0003199	rno-miR-381-3p	Ceacam1	81613	ENSRNOG00000020578	NA	NA	NA	predicted	-0.4632	miranda
MIMAT0003199	rno-miR-381-3p	LOC102556337	301563	ENSRNOG00000015428	NA	NA	NA	predicted	-0.4656	miranda
MIMAT0003199	rno-miR-381-3p	Impa1	83523	ENSRNOG00000010482	NA	NA	NA	predicted	-0.4669	miranda
MIMAT0003199	rno-miR-381-3p	Adcy8	29241	ENSRNOG00000004890	NA	NA	NA	predicted	-0.4676	miranda
MIMAT0003199	rno-miR-381-3p	Gng5	79218	ENSRNOG00000038205	NA	NA	NA	predicted	-0.4694	miranda
MIMAT0003199	rno-miR-381-3p	Oas1b	246268	ENSRNOG00000033220	NA	NA	NA	predicted	-0.482	miranda
MIMAT0003199	rno-miR-381-3p	Trpc4	84494	ENSRNOG00000011133	NA	NA	NA	predicted	-0.4891	miranda
MIMAT0003199	rno-miR-381-3p	Hipk4	308449	ENSRNOG00000020835	NA	NA	NA	predicted	-0.4932	miranda
MIMAT0003199	rno-miR-381-3p	Gabpb1	499883	ENSRNOG00000010659	NA	NA	NA	predicted	-0.4938	miranda
MIMAT0003199	rno-miR-381-3p	P2ry14	171108	ENSRNOG00000013872	NA	NA	NA	predicted	-0.4992	miranda
MIMAT0003199	rno-miR-381-3p	Syne1	499010	ENSRNOG00000018960	NA	NA	NA	predicted	-0.5047	miranda
MIMAT0003199	rno-miR-381-3p	Pon3	312086	ENSRNOG00000009096	NA	NA	NA	predicted	-0.5262	miranda
MIMAT0003199	rno-miR-381-3p	C3	24232	ENSRNOG00000046834	NA	NA	NA	predicted	-0.5263	miranda
MIMAT0003199	rno-miR-381-3p	Nudt21	291877	ENSRNOG00000042983	NA	NA	NA	predicted	-0.5277	miranda
MIMAT0003199	rno-miR-381-3p	Mterfd3	366856	ENSRNOG00000006978	NA	NA	NA	predicted	-0.543	miranda
MIMAT0003199	rno-miR-381-3p	Atp1b4	84396	ENSRNOG00000007059	NA	NA	NA	predicted	-0.5503	miranda
[truncated: 124 more rows]

## Sheet: miR-23b-3p
miRNA id	mature mirna acc	target symbol	target entrez	target ensembl	experiment	support type	type	score	database
rno-miR-23b-3p	MIMAT0000793	Smad3			Western blot		validated	NA	mirecords
rno-miR-23b-3p	MIMAT0000793	Sept3.	56003	ENSRNOG00000007686	Microarray	Functional MTI (Weak)	validated	NA	mirtarbase
rno-miR-23b-3p	MIMAT0000793	Zfp652	497984	ENSRNOG00000017001	NA	NA	predicted	0.821	elmmo
rno-miR-23b-3p	MIMAT0000793	Dhx15	100910750	ENSRNOG00000003844	NA	NA	predicted	0.821	elmmo
rno-miR-23b-3p	MIMAT0000793	Zfp292	50552	ENSRNOG00000031031	NA	NA	predicted	0.821	elmmo
rno-miR-23b-3p	MIMAT0000793	Cnot6l	360917	ENSRNOG00000002075	NA	NA	predicted	0.821	elmmo
rno-miR-23b-3p	MIMAT0000793	LOC100910750	289693	ENSRNOG00000003844	NA	NA	predicted	0.821	elmmo
rno-miR-23b-3p	MIMAT0000793	Rsbn1	310749	ENSRNOG00000019671	NA	NA	predicted	0.821	elmmo
rno-miR-23b-3p	MIMAT0000793	Rtf1	366169	ENSRNOG00000005183	NA	NA	predicted	0.821	elmmo
rno-miR-23b-3p	MIMAT0000793	Gap43	29423	ENSRNOG00000001528	NA	NA	predicted	0.821	elmmo
rno-miR-23b-3p	MIMAT0000793	Khdrbs1	117268	ENSRNOG00000046794	NA	NA	predicted	0.821	elmmo
rno-miR-23b-3p	MIMAT0000793	Mcfd2	246117	ENSRNOG00000015059	NA	NA	predicted	0.821	elmmo
rno-miR-23b-3p	MIMAT0000793	Sms	363469	ENSRNOG00000007688	NA	NA	predicted	0.821	elmmo
rno-miR-23b-3p	MIMAT0000793	Msl2	315959	ENSRNOG00000023021	NA	NA	predicted	0.821	elmmo
rno-miR-23b-3p	MIMAT0000793	Nacc2	296583	ENSRNOG00000018231	NA	NA	predicted	0.821	elmmo
rno-miR-23b-3p	MIMAT0000793	Gpr64	266735	ENSRNOG00000032472	NA	NA	predicted	0.794	elmmo
rno-miR-23b-3p	MIMAT0000793	Ebf3	361668	ENSRNOG00000016102	NA	NA	predicted	0.794	elmmo
rno-miR-23b-3p	MIMAT0000793	Vcan	114122	ENSRNOG00000029212	NA	NA	predicted	0.794	elmmo
rno-miR-23b-3p	MIMAT0000793	Ywhag	56010	ENSRNOG00000001436	NA	NA	predicted	0.794	elmmo
rno-miR-23b-3p	MIMAT0000793	Sesn3	315427	ENSRNOG00000008173	NA	NA	predicted	0.794	elmmo
rno-miR-23b-3p	MIMAT0000793	Zc3h13	305955	ENSRNOG00000011237	NA	NA	predicted	0.794	elmmo
rno-miR-23b-3p	MIMAT0000793	Gpbp1	294734	ENSRNOG00000013002	NA	NA	predicted	0.794	elmmo
rno-miR-23b-3p	MIMAT0000793	LOC100360316	114637	ENSRNOG00000051615	NA	NA	predicted	0.794	elmmo
rno-miR-23b-3p	MIMAT0000793	LOC679811	679811	ENSRNOG00000009837	NA	NA	predicted	0.794	elmmo
rno-miR-23b-3p	MIMAT0000793	Myh1	252942	ENSRNOG00000049695	NA	NA	predicted	0.794	elmmo
rno-miR-23b-3p	MIMAT0000793	Wnk1	116477	ENSRNOG00000009956	NA	NA	predicted	0.794	elmmo
rno-miR-23b-3p	MIMAT0000793	Dnajc6	313409	ENSRNOG00000052887	NA	NA	predicted	0.794	elmmo
rno-miR-23b-3p	MIMAT0000793	Tlk1	311118	ENSRNOG00000009300	NA	NA	predicted	0.794	elmmo
rno-miR-23b-3p	MIMAT0000793	Dlg2	64053	ENSRNOG00000022635	NA	NA	predicted	0.794	elmmo
rno-miR-23b-3p	MIMAT0000793	Fam126b	316415	ENSRNOG00000025079	NA	NA	predicted	0.794	elmmo
rno-miR-23b-3p	MIMAT0000793	Lrch1	502020	ENSRNOG00000009412	NA	NA	predicted	0.794	elmmo
rno-miR-23b-3p	MIMAT0000793	Tnks2	309512	ENSRNOG00000052664	NA	NA	predicted	0.794	elmmo
rno-miR-23b-3p	MIMAT0000793	Hmgn2	100360316	ENSRNOG00000043004	NA	NA	predicted	0.794	elmmo
rno-miR-23b-3p	MIMAT0000793	Sgk1	29517	ENSRNOG00000011815	NA	NA	predicted	0.794	elmmo
rno-miR-23b-3p	MIMAT0000793	Hmgb2	498072	ENSRNOG00000013167	NA	NA	predicted	0.794	elmmo
rno-miR-23b-3p	MIMAT0000793	Naa15	310399	ENSRNOG00000012385	NA	NA	predicted	0.794	elmmo
rno-miR-23b-3p	MIMAT0000793	Wtap	499020	ENSRNOG00000019091	NA	NA	predicted	0.794	elmmo
rno-miR-23b-3p	MIMAT0000793	Cul3	301555	ENSRNOG00000015633	NA	NA	predicted	0.794	elmmo
rno-miR-23b-3p	MIMAT0000793	Rai14	294804	ENSRNOG00000028872	NA	NA	predicted	0.794	elmmo
rno-miR-23b-3p	MIMAT0000793	Dusp5	171109	ENSRNOG00000014061	NA	NA	predicted	0.794	elmmo
rno-miR-23b-3p	MIMAT0000793	Fbxo11	301674	ENSRNOG00000016396	NA	NA	predicted	0.794	elmmo
rno-miR-23b-3p	MIMAT0000793	Rbpms2	503214	ENSRNOG00000015896	NA	NA	predicted	0.794	elmmo
rno-miR-23b-3p	MIMAT0000793	Hoxd10	303991	ENSRNOG00000001581	NA	NA	predicted	0.794	elmmo
rno-miR-23b-3p	MIMAT0000793	Myh4	360543	ENSRNOG00000049898	NA	NA	predicted	0.794	elmmo
rno-miR-23b-3p	MIMAT0000793	G3bp2	305240	ENSRNOG00000002433	NA	NA	predicted	0.794	elmmo
rno-miR-23b-3p	MIMAT0000793	Bnip3l	140923	ENSRNOG00000009820	NA	NA	predicted	0.794	elmmo
rno-miR-23b-3p	MIMAT0000793	Ipo5	306182	ENSRNOG00000010989	NA	NA	predicted	0.794	elmmo
rno-miR-23b-3p	MIMAT0000793	Prkrir	308845	ENSRNOG00000015808	NA	NA	predicted	0.794	elmmo
rno-miR-23b-3p	MIMAT0000793	Ppp2r5e	299147	ENSRNOG00000005045	NA	NA	predicted	0.794	elmmo
rno-miR-23b-3p	MIMAT0000793	Smek2	360993	ENSRNOG00000003712	NA	NA	predicted	0.794	elmmo
rno-miR-23b-3p	MIMAT0000793	Tgif1	316742	ENSRNOG00000015906	NA	NA	predicted	0.794	elmmo
rno-miR-23b-3p	MIMAT0000793	Mapre1	114764	ENSRNOG00000011798	NA	NA	predicted	0.794	elmmo
rno-miR-23b-3p	MIMAT0000793	Pde7a	81744	ENSRNOG00000013048	NA	NA	predicted	0.794	elmmo
rno-miR-23b-3p	MIMAT0000793	Clcn3	84360	ENSRNOG00000010682	NA	NA	predicted	0.794	elmmo
rno-miR-23b-3p	MIMAT0000793	Tox	362481	ENSRNOG00000010777	NA	NA	predicted	0.794	elmmo
rno-miR-23b-3p	MIMAT0000793	Tgfbr3	29610	ENSRNOG00000002093	NA	NA	predicted	0.794	elmmo
rno-miR-23b-3p	MIMAT0000793	Fam175b	293570	ENSRNOG00000017222	NA	NA	predicted	0.794	elmmo
rno-miR-23b-3p	MIMAT0000793	Ube2o	303689	ENSRNOG00000011007	NA	NA	predicted	0.794	elmmo
rno-miR-23b-3p	MIMAT0000793	LOC100910717	309512	ENSRNOG00000052664	NA	NA	predicted	0.794	elmmo
rno-miR-23b-3p	MIMAT0000793	Spry2	306141	ENSRNOG00000010058	NA	NA	predicted	0.794	elmmo
rno-miR-23b-3p	MIMAT0000793	Lphn2	171447	ENSRNOG00000032660	NA	NA	predicted	0.794	elmmo
rno-miR-23b-3p	MIMAT0000793	Klf3	114845	ENSRNOG00000002163	NA	NA	predicted	0.794	elmmo
rno-miR-23b-3p	MIMAT0000793	Tox3	291908	ENSRNOG00000028649	NA	NA	predicted	0.794	elmmo
rno-miR-23b-3p	MIMAT0000793	Tmpo	25359	ENSRNOG00000008797	NA	NA	predicted	0.794	elmmo
rno-miR-23b-3p	MIMAT0000793	Tmem2	309400	ENSRNOG00000012782	NA	NA	predicted	0.794	elmmo
rno-miR-23b-3p	MIMAT0000793	Pkia	114906	ENSRNOG00000012095	NA	NA	predicted	0.794	elmmo
rno-miR-23b-3p	MIMAT0000793	Zfhx4	310250	ENSRNOG00000008765	NA	NA	predicted	0.794	elmmo
rno-miR-23b-3p	MIMAT0000793	Mtss1	362918	ENSRNOG00000009001	NA	NA	predicted	0.794	elmmo
rno-miR-23b-3p	MIMAT0000793	Asf1a	294408	ENSRNOG00000000415	NA	NA	predicted	0.794	elmmo
rno-miR-23b-3p	MIMAT0000793	Smurf2	303614	ENSRNOG00000014623	NA	NA	predicted	0.794	elmmo
rno-miR-23b-3p	MIMAT0000793	Tshz3	308523	ENSRNOG00000013938	NA	NA	predicted	0.794	elmmo
rno-miR-23b-3p	MIMAT0000793	Elf2	361944	ENSRNOG00000010815	NA	NA	predicted	0.794	elmmo
rno-miR-23b-3p	MIMAT0000793	Tnrc6b	192178	ENSRNOG00000024907	NA	NA	predicted	0.794	elmmo
rno-miR-23b-3p	MIMAT0000793	Gls	24398	ENSRNOG00000056246	NA	NA	predicted	0.794	elmmo
rno-miR-23b-3p	MIMAT0000793	Ube2d1	361831	ENSRNOG00000000611	NA	NA	predicted	0.794	elmmo
rno-miR-23b-3p	MIMAT0000793	Sema6d	311384	ENSRNOG00000004812	NA	NA	predicted	0.794	elmmo
rno-miR-23b-3p	MIMAT0000793	Hnrnpu	117280	ENSRNOG00000033790	NA	NA	predicted	0.794	elmmo
rno-miR-23b-3p	MIMAT0000793	RGD1306151	362455	ENSRNOG00000008443	NA	NA	predicted	0.794	elmmo
rno-miR-23b-3p	MIMAT0000793	Nol4	307553	ENSRNOG00000014775	NA	NA	predicted	0.794	elmmo
rno-miR-23b-3p	MIMAT0000793	Sec14l1	360668	ENSRNOG00000002722	NA	NA	predicted	0.794	elmmo
rno-miR-23b-3p	MIMAT0000793	LOC102549131	100360316	ENSRNOG00000043004	NA	NA	predicted	0.794	elmmo
rno-miR-23b-3p	MIMAT0000793	Zcchc2	304695	ENSRNOG00000002882	NA	NA	predicted	0.794	elmmo
rno-miR-23b-3p	MIMAT0000793	Hnrnpr	319110	ENSRNOG00000011910	NA	NA	predicted	0.793	elmmo
rno-miR-23b-3p	MIMAT0000793	Pou3f3	192109	ENSRNOG00000038909	NA	NA	predicted	0.793	elmmo
rno-miR-23b-3p	MIMAT0000793	Rin2	311494	ENSRNOG00000010131	NA	NA	predicted	0.793	elmmo
rno-miR-23b-3p	MIMAT0000793	Strn3	114520	ENSRNOG00000060335	NA	NA	predicted	0.793	elmmo
rno-miR-23b-3p	MIMAT0000793	Tnrc6a	308971	ENSRNOG00000024737	NA	NA	predicted	0.793	elmmo
rno-miR-23b-3p	MIMAT0000793	Fbxo33	314157	ENSRNOG00000005285	NA	NA	predicted	0.793	elmmo
rno-miR-23b-3p	MIMAT0000793	Stag1	315958	ENSRNOG00000015389	NA	NA	predicted	0.793	elmmo
rno-miR-23b-3p	MIMAT0000793	Papd5	307745	ENSRNOG00000024212	NA	NA	predicted	0.793	elmmo
rno-miR-23b-3p	MIMAT0000793	Hmgn3	113990	ENSRNOG00000031032	NA	NA	predicted	0.793	elmmo
rno-miR-23b-3p	MIMAT0000793	Snap25	25012	ENSRNOG00000006037	NA	NA	predicted	0.793	elmmo
rno-miR-23b-3p	MIMAT0000793	Ube2v2	287927	ENSRNOG00000001829	NA	NA	predicted	0.793	elmmo
rno-miR-23b-3p	MIMAT0000793	Zzz3	310958	ENSRNOG00000050321	NA	NA	predicted	0.793	elmmo
rno-miR-23b-3p	MIMAT0000793	Dcun1d5	315405	ENSRNOG00000008390	NA	NA	predicted	0.762	elmmo
rno-miR-23b-3p	MIMAT0000793	B4galt6	65196	ENSRNOG00000015895	NA	NA	predicted	0.762	elmmo
rno-miR-23b-3p	MIMAT0000793	Lrp1b	311926	ENSRNOG00000030243	NA	NA	predicted	0.762	elmmo
rno-miR-23b-3p	MIMAT0000793	Vkorc1l1	100909758	ENSRNOG00000018291	NA	NA	predicted	0.762	elmmo
rno-miR-23b-3p	MIMAT0000793	Runx1t1	362489	ENSRNOG00000005673	NA	NA	predicted	0.762	elmmo
rno-miR-23b-3p	MIMAT0000793	Dip2c	307067	ENSRNOG00000015288	NA	NA	predicted	0.762	elmmo
rno-miR-23b-3p	MIMAT0000793	Map4k4	301363	ENSRNOG00000014013	NA	NA	predicted	0.762	elmmo
rno-miR-23b-3p	MIMAT0000793	Lgr4	286994	ENSRNOG00000005715	NA	NA	predicted	0.762	elmmo
rno-miR-23b-3p	MIMAT0000793	Ppp1cb	25594	ENSRNOG00000004612	NA	NA	predicted	0.762	elmmo
rno-miR-23b-3p	MIMAT0000793	Lamp1	25328	ENSRNOG00000019629	NA	NA	predicted	0.762	elmmo
rno-miR-23b-3p	MIMAT0000793	Tmed7	252889	ENSRNOG00000003691	NA	NA	predicted	0.762	elmmo
rno-miR-23b-3p	MIMAT0000793	Prpf4b	291078	ENSRNOG00000016705	NA	NA	predicted	0.762	elmmo
rno-miR-23b-3p	MIMAT0000793	RGD1561582	501052	ENSRNOG00000021528	NA	NA	predicted	0.729	elmmo
rno-miR-23b-3p	MIMAT0000793	Bora	306102	ENSRNOG00000024798	NA	NA	predicted	0.729	elmmo
rno-miR-23b-3p	MIMAT0000793	Cxcl12	24772	ENSRNOG00000013589	NA	NA	predicted	0.729	elmmo
rno-miR-23b-3p	MIMAT0000793	Npepps	50558	ENSRNOG00000023095	NA	NA	predicted	0.729	elmmo
rno-miR-23b-3p	MIMAT0000793	Has2	25694	ENSRNOG00000004854	NA	NA	predicted	0.729	elmmo
rno-miR-23b-3p	MIMAT0000793	Meis2	311311	ENSRNOG00000004730	NA	NA	predicted	0.729	elmmo
rno-miR-23b-3p	MIMAT0000793	Rras2	365355	ENSRNOG00000012258	NA	NA	predicted	0.729	elmmo
rno-miR-23b-3p	MIMAT0000793	Stat5b	25126	ENSRNOG00000019075	NA	NA	predicted	0.729	elmmo
rno-miR-23b-3p	MIMAT0000793	Nek7	360850	ENSRNOG00000000657	NA	NA	predicted	0.729	elmmo
rno-miR-23b-3p	MIMAT0000793	Fam222b	497960	ENSRNOG00000029570	NA	NA	predicted	0.729	elmmo
rno-miR-23b-3p	MIMAT0000793	Whsc1	680537	ENSRNOG00000038140	NA	NA	predicted	0.729	elmmo
rno-miR-23b-3p	MIMAT0000793	Pkdcc	313860	ENSRNOG00000004205	NA	NA	predicted	0.729	elmmo
rno-miR-23b-3p	MIMAT0000793	LOC686349	308372	ENSRNOG00000038140	NA	NA	predicted	0.729	elmmo
rno-miR-23b-3p	MIMAT0000793	Robo2	84409	ENSRNOG00000029598	NA	NA	predicted	0.729	elmmo
rno-miR-23b-3p	MIMAT0000793	Mab21l2	680102	ENSRNOG00000031398	NA	NA	predicted	0.729	elmmo
rno-miR-23b-3p	MIMAT0000793	Dlx1	296500	ENSRNOG00000001520	NA	NA	predicted	0.729	elmmo
rno-miR-23b-3p	MIMAT0000793	Map3k3	303604	ENSRNOG00000061424	NA	NA	predicted	0.729	elmmo
rno-miR-23b-3p	MIMAT0000793	Sirpa	25528	ENSRNOG00000004763	NA	NA	predicted	0.729	elmmo
rno-miR-23b-3p	MIMAT0000793	Marcksl1	81520	ENSRNOG00000009113	NA	NA	predicted	0.729	elmmo
rno-miR-23b-3p	MIMAT0000793	Mdfic	362325	ENSRNOG00000053787	NA	NA	predicted	0.729	elmmo
rno-miR-23b-3p	MIMAT0000793	Papolg	305586	ENSRNOG00000006261	NA	NA	predicted	0.729	elmmo
rno-miR-23b-3p	MIMAT0000793	Vegfa	83785	ENSRNOG00000019598	NA	NA	predicted	0.729	elmmo
rno-miR-23b-3p	MIMAT0000793	Ccnt2	304758	ENSRNOG00000017113	NA	NA	predicted	0.729	elmmo
rno-miR-23b-3p	MIMAT0000793	Tusc2	501052	ENSRNOG00000021528	NA	NA	predicted	0.729	elmmo
rno-miR-23b-3p	MIMAT0000793	Lhfpl2	294643	ENSRNOG00000011032	NA	NA	predicted	0.729	elmmo
rno-miR-23b-3p	MIMAT0000793	Itsn1	29491	ENSRNOG00000002001	NA	NA	predicted	0.729	elmmo
rno-miR-23b-3p	MIMAT0000793	Ndfip2	361089	ENSRNOG00000024022	NA	NA	predicted	0.729	elmmo
rno-miR-23b-3p	MIMAT0000793	Hic1		ENSRNOG00000046405	NA	NA	predicted	0.729	elmmo
rno-miR-23b-3p	MIMAT0000793	Slc30a1	58976	ENSRNOG00000004749	NA	NA	predicted	0.729	elmmo
rno-miR-23b-3p	MIMAT0000793	Hdac2	84577	ENSRNOG00000000604	NA	NA	predicted	0.729	elmmo
rno-miR-23b-3p	MIMAT0000793	Irf1	24508	ENSRNOG00000008144	NA	NA	predicted	0.729	elmmo
rno-miR-23b-3p	MIMAT0000793	Sdc2	25615	ENSRNOG00000004936	NA	NA	predicted	0.729	elmmo
rno-miR-23b-3p	MIMAT0000793	Tmod1	25566	ENSRNOG00000009761	NA	NA	predicted	0.729	elmmo
rno-miR-23b-3p	MIMAT0000793	Mex3c	307271	ENSRNOG00000015777	NA	NA	predicted	0.729	elmmo
rno-miR-23b-3p	MIMAT0000793	Kdm4a	313539	ENSRNOG00000019956	NA	NA	predicted	0.729	elmmo
rno-miR-23b-3p	MIMAT0000793	Elf5	366142	ENSRNOG00000008282	NA	NA	predicted	0.729	elmmo
rno-miR-23b-3p	MIMAT0000793	Cab39	301574	ENSRNOG00000017297	NA	NA	predicted	0.729	elmmo
rno-miR-23b-3p	MIMAT0000793	Hnf4g	365744	ENSRNOG00000008971	NA	NA	predicted	0.729	elmmo
rno-miR-23b-3p	MIMAT0000793	Btaf1	368042	ENSRNOG00000017938	NA	NA	predicted	0.729	elmmo
rno-miR-23b-3p	MIMAT0000793	Cdc40	361859	ENSRNOG00000000581	NA	NA	predicted	0.729	elmmo
rno-miR-23b-3p	MIMAT0000793	Atxn7l3	287734	ENSRNOG00000020930	NA	NA	predicted	0.729	elmmo
rno-miR-23b-3p	MIMAT0000793	Prtg	315806	ENSRNOG00000055251	NA	NA	predicted	0.729	elmmo
rno-miR-23b-3p	MIMAT0000793	Mdfi	501097	ENSRNOG00000014987	NA	NA	predicted	0.729	elmmo
rno-miR-23b-3p	MIMAT0000793	Snx27	260323	ENSRNOG00000020893	NA	NA	predicted	0.729	elmmo
rno-miR-23b-3p	MIMAT0000793	Nrgn	64356	ENSRNOG00000010688	NA	NA	predicted	0.729	elmmo
rno-miR-23b-3p	MIMAT0000793	Egln2	308457	ENSRNOG00000020947	NA	NA	predicted	0.729	elmmo
rno-miR-23b-3p	MIMAT0000793	Hspa12a	307997	ENSRNOG00000018019	NA	NA	predicted	0.729	elmmo
rno-miR-23b-3p	MIMAT0000793	Akap12	83425	ENSRNOG00000019549	NA	NA	predicted	0.729	elmmo
rno-miR-23b-3p	MIMAT0000793	Fbxo42	362646	ENSRNOG00000014305	NA	NA	predicted	0.729	elmmo
rno-miR-23b-3p	MIMAT0000793	Atp6v1b2	117596	ENSRNOG00000011891	NA	NA	predicted	0.729	elmmo
rno-miR-23b-3p	MIMAT0000793	Entpd5	314312	ENSRNOG00000033206	NA	NA	predicted	0.729	elmmo
rno-miR-23b-3p	MIMAT0000793	Gja1	24392	ENSRNOG00000000805	NA	NA	predicted	0.729	elmmo
rno-miR-23b-3p	MIMAT0000793	Kcnk3	29553	ENSRNOG00000009790	NA	NA	predicted	0.729	elmmo
rno-miR-23b-3p	MIMAT0000793	Prdm1	309871	ENSRNOG00000000323	NA	NA	predicted	0.729	elmmo
rno-miR-23b-3p	MIMAT0000793	Rad23b	298012	ENSRNOG00000016137	NA	NA	predicted	0.729	elmmo
rno-miR-23b-3p	MIMAT0000793	Lrrc4	641521	ENSRNOG00000008098	NA	NA	predicted	0.729	elmmo
rno-miR-23b-3p	MIMAT0000793	Aldh1a2	116676	ENSRNOG00000055049	NA	NA	predicted	0.729	elmmo
rno-miR-23b-3p	MIMAT0000793	Nck2	316369	ENSRNOG00000017155	NA	NA	predicted	0.729	elmmo
rno-miR-23b-3p	MIMAT0000793	Zbtb2	308126	ENSRNOG00000019544	NA	NA	predicted	0.725	elmmo
rno-miR-23b-3p	MIMAT0000793	Slc6a14	298340	ENSRNOG00000005687	NA	NA	predicted	0.72	elmmo
rno-miR-23b-3p	MIMAT0000793	Pdia6	286906	ENSRNOG00000050197	NA	NA	predicted	0.72	elmmo
rno-miR-23b-3p	MIMAT0000793	Ggnbp2	360584	ENSRNOG00000027860	NA	NA	predicted	0.708	elmmo
rno-miR-23b-3p	MIMAT0000793	Ambra1	59319	ENSRNOG00000017422	NA	NA	predicted	0.708	elmmo
rno-miR-23b-3p	MIMAT0000793	Ccnd1	58919	ENSRNOG00000020918	NA	NA	predicted	0.708	elmmo
rno-miR-23b-3p	MIMAT0000793	Ctcf	83726	ENSRNOG00000017674	NA	NA	predicted	0.708	elmmo
rno-miR-23b-3p	MIMAT0000793	Etv1	362733	ENSRNOG00000006867	NA	NA	predicted	0.708	elmmo
rno-miR-23b-3p	MIMAT0000793	Atrn	83526	ENSRNOG00000021240	NA	NA	predicted	0.688	elmmo
rno-miR-23b-3p	MIMAT0000793	Pnrc1	286988	ENSRNOG00000007793	NA	NA	predicted	0.688	elmmo
rno-miR-23b-3p	MIMAT0000793	Etnk1	312828	ENSRNOG00000014856	NA	NA	predicted	0.684	elmmo
rno-miR-23b-3p	MIMAT0000793	Scaf4	245924	ENSRNOG00000002104	NA	NA	predicted	0.684	elmmo
rno-miR-23b-3p	MIMAT0000793	Ctnnbip1	503000	ENSRNOG00000016313	NA	NA	predicted	0.684	elmmo
rno-miR-23b-3p	MIMAT0000793	Atxn7l3b	100192313	ENSRNOG00000059744	NA	NA	predicted	0.684	elmmo
rno-miR-23b-3p	MIMAT0000793	Cep85	362622	ENSRNOG00000016249	NA	NA	predicted	0.683	elmmo
rno-miR-23b-3p	MIMAT0000793	Srpk2	296753	ENSRNOG00000010601	NA	NA	predicted	0.683	elmmo
rno-miR-23b-3p	MIMAT0000793	Fam117b	363236	ENSRNOG00000022066	NA	NA	predicted	0.683	elmmo
rno-miR-23b-3p	MIMAT0000793	Csnk2a2	307641	ENSRNOG00000011933	NA	NA	predicted	0.672	elmmo
rno-miR-23b-3p	MIMAT0000793	Stk35	311419	ENSRNOG00000006002	NA	NA	predicted	0.672	elmmo
rno-miR-23b-3p	MIMAT0000793	Kpna4	361959	ENSRNOG00000010768	NA	NA	predicted	0.672	elmmo
rno-miR-23b-3p	MIMAT0000793	Zfp644	305127	ENSRNOG00000002112	NA	NA	predicted	0.672	elmmo
rno-miR-23b-3p	MIMAT0000793	Stk4	311622	ENSRNOG00000013529	NA	NA	predicted	0.672	elmmo
rno-miR-23b-3p	MIMAT0000793	Ubqln2	317396	ENSRNOG00000003099	NA	NA	predicted	0.672	elmmo
rno-miR-23b-3p	MIMAT0000793	Inpp5a	365382	ENSRNOG00000017635	NA	NA	predicted	0.672	elmmo
rno-miR-23b-3p	MIMAT0000793	Ccm2	305505	ENSRNOG00000060825	NA	NA	predicted	0.67	elmmo
rno-miR-23b-3p	MIMAT0000793	Meis1	686117	ENSRNOG00000004606	NA	NA	predicted	0.67	elmmo
rno-miR-23b-3p	MIMAT0000793	Gxylt1	100912135	ENSRNOG00000005234	NA	NA	predicted	0.66	elmmo
rno-miR-23b-3p	MIMAT0000793	Kitlg	60427	ENSRNOG00000005386	NA	NA	predicted	0.66	elmmo
rno-miR-23b-3p	MIMAT0000793	Tgfa	24827	ENSRNOG00000016182	NA	NA	predicted	0.66	elmmo
rno-miR-23b-3p	MIMAT0000793	Hiat1	100134827	ENSRNOG00000050407	NA	NA	predicted	0.659	elmmo
rno-miR-23b-3p	MIMAT0000793	Chsy1	292999	ENSRNOG00000012698	NA	NA	predicted	0.659	elmmo
rno-miR-23b-3p	MIMAT0000793	Brd1	315210	ENSRNOG00000004538	NA	NA	predicted	0.652	elmmo
rno-miR-23b-3p	MIMAT0000793	Trim63	140939	ENSRNOG00000016543	NA	NA	predicted	0.649	elmmo
rno-miR-23b-3p	MIMAT0000793	Rfx3	361746	ENSRNOG00000014486	NA	NA	predicted	0.649	elmmo
rno-miR-23b-3p	MIMAT0000793	Maml1	303101	ENSRNOG00000003268	NA	NA	predicted	0.649	elmmo
rno-miR-23b-3p	MIMAT0000793	Plau	25619	ENSRNOG00000010516	NA	NA	predicted	0.649	elmmo
rno-miR-23b-3p	MIMAT0000793	Ipmk	171458	ENSRNOG00000000609	NA	NA	predicted	0.649	elmmo
rno-miR-23b-3p	MIMAT0000793	Sec24a	287275	ENSRNOG00000004563	NA	NA	predicted	0.649	elmmo
rno-miR-23b-3p	MIMAT0000793	Atp6v1e1	297566	ENSRNOG00000011905	NA	NA	predicted	0.649	elmmo
rno-miR-23b-3p	MIMAT0000793	Vsnl1	24877	ENSRNOG00000005345	NA	NA	predicted	0.649	elmmo
rno-miR-23b-3p	MIMAT0000793	Col11a2	294279	ENSRNOG00000000463	NA	NA	predicted	0.649	elmmo
rno-miR-23b-3p	MIMAT0000793	Stau2	171500	ENSRNOG00000042458	NA	NA	predicted	0.649	elmmo
rno-miR-23b-3p	MIMAT0000793	Hook2	304669	ENSRNOG00000003682	NA	NA	predicted	0.649	elmmo
rno-miR-23b-3p	MIMAT0000793	Msmo1	140910	ENSRNOG00000032297	NA	NA	predicted	0.649	elmmo
rno-miR-23b-3p	MIMAT0000793	Pum2	298874	ENSRNOG00000006180	NA	NA	predicted	0.649	elmmo
rno-miR-23b-3p	MIMAT0000793	Jag1	29146	ENSRNOG00000007443	NA	NA	predicted	0.645	elmmo
rno-miR-23b-3p	MIMAT0000793	Adra2b	24174	ENSRNOG00000013887	NA	NA	predicted	0.625	elmmo
rno-miR-23b-3p	MIMAT0000793	Slc7a1	25648	ENSRNOG00000000924	NA	NA	predicted	0.621	elmmo
rno-miR-23b-3p	MIMAT0000793	Rad17	310034	ENSRNOG00000018353	NA	NA	predicted	0.62	elmmo
rno-miR-23b-3p	MIMAT0000793	Hoxb5	497987	ENSRNOG00000008010	NA	NA	predicted	0.612	elmmo
rno-miR-23b-3p	MIMAT0000793	Stx17	252853	ENSRNOG00000005801	NA	NA	predicted	0.61	elmmo
rno-miR-23b-3p	MIMAT0000793	Cck	25298	ENSRNOG00000019321	NA	NA	predicted	0.61	elmmo
rno-miR-23b-3p	MIMAT0000793	Serinc5	170907	ENSRNOG00000024039	NA	NA	predicted	0.61	elmmo
rno-miR-23b-3p	MIMAT0000793	Tbp	117526	ENSRNOG00000001489	NA	NA	predicted	0.61	elmmo
rno-miR-23b-3p	MIMAT0000793	Cd163	312701	ENSRNOG00000010253	NA	NA	predicted	0.61	elmmo
rno-miR-23b-3p	MIMAT0000793	Nefl	83613	ENSRNOG00000013658	NA	NA	predicted	0.61	elmmo
rno-miR-23b-3p	MIMAT0000793	Bet1	29631	ENSRNOG00000011008	NA	NA	predicted	0.61	elmmo
rno-miR-23b-3p	MIMAT0000793	Stx12	65033	ENSRNOG00000011804	NA	NA	predicted	0.61	elmmo
rno-miR-23b-3p	MIMAT0000793	Nap1l5	688843	ENSRNOG00000007808	NA	NA	predicted	0.61	elmmo
rno-miR-23b-3p	MIMAT0000793	Tef	29362	ENSRNOG00000019383	NA	NA	predicted	0.61	elmmo
rno-miR-23b-3p	MIMAT0000793	LOC100909443	100911743	ENSRNOG00000007627	NA	NA	predicted	0.61	elmmo
rno-miR-23b-3p	MIMAT0000793	Cldn12	500000	ENSRNOG00000039862	NA	NA	predicted	0.61	elmmo
rno-miR-23b-3p	MIMAT0000793	Slc9a6	302863	ENSRNOG00000000879	NA	NA	predicted	0.61	elmmo
rno-miR-23b-3p	MIMAT0000793	C1galt1c1	302499	ENSRNOG00000002536	NA	NA	predicted	0.61	elmmo
rno-miR-23b-3p	MIMAT0000793	Klf5	84410	ENSRNOG00000008785	NA	NA	predicted	0.61	elmmo
rno-miR-23b-3p	MIMAT0000793	Tpm3	117557	ENSRNOG00000017441	NA	NA	predicted	0.61	elmmo
rno-miR-23b-3p	MIMAT0000793	Otub1	314660	ENSRNOG00000021175	NA	NA	predicted	0.61	elmmo
rno-miR-23b-3p	MIMAT0000793	Stard3nl	291182	ENSRNOG00000052429	NA	NA	predicted	0.61	elmmo
rno-miR-23b-3p	MIMAT0000793	Hoxa2	100911443	ENSRNOG00000005968	NA	NA	predicted	0.61	elmmo
rno-miR-23b-3p	MIMAT0000793	Kcnk5	364241	ENSRNOG00000047005	NA	NA	predicted	0.61	elmmo
rno-miR-23b-3p	MIMAT0000793	LOC100911750	100911750	ENSRNOG00000020110	NA	NA	predicted	0.61	elmmo
rno-miR-23b-3p	MIMAT0000793	LOC100911443	24452	ENSRNOG00000005968	NA	NA	predicted	0.61	elmmo
rno-miR-23b-3p	MIMAT0000793	Ets1	24356	ENSRNOG00000008941	NA	NA	predicted	0.61	elmmo
rno-miR-23b-3p	MIMAT0000793	Zfp655	100910762	ENSRNOG00000043178	NA	NA	predicted	0.61	elmmo
rno-miR-23b-3p	MIMAT0000793	Map3k12	25579	ENSRNOG00000015134	NA	NA	predicted	0.61	elmmo
rno-miR-23b-3p	MIMAT0000793	Fut4	60670	ENSRNOG00000009157	NA	NA	predicted	0.61	elmmo
rno-miR-23b-3p	MIMAT0000793	St18	266680	ENSRNOG00000006200	NA	NA	predicted	0.61	elmmo
rno-miR-23b-3p	MIMAT0000793	Zfp579	308339	ENSRNOG00000016608	NA	NA	predicted	0.61	elmmo
rno-miR-23b-3p	MIMAT0000793	Adam19	303068	ENSRNOG00000042980	NA	NA	predicted	0.61	elmmo
rno-miR-23b-3p	MIMAT0000793	LOC100360200	100360200	ENSRNOG00000025217	NA	NA	predicted	0.61	elmmo
rno-miR-23b-3p	MIMAT0000793	Snrpc	361808	ENSRNOG00000000493	NA	NA	predicted	0.61	elmmo
rno-miR-23b-3p	MIMAT0000793	Ccng1	25405	ENSRNOG00000003256	NA	NA	predicted	0.61	elmmo
rno-miR-23b-3p	MIMAT0000793	RGD1307235	309053	ENSRNOG00000015508	NA	NA	predicted	0.61	elmmo
rno-miR-23b-3p	MIMAT0000793	Sys1	685079	ENSRNOG00000014480	NA	NA	predicted	0.61	elmmo
rno-miR-23b-3p	MIMAT0000793	Sft2d1	292305	ENSRNOG00000024140	NA	NA	predicted	0.61	elmmo
rno-miR-23b-3p	MIMAT0000793	Rbm6	315997	ENSRNOG00000018333	NA	NA	predicted	0.61	elmmo
rno-miR-23b-3p	MIMAT0000793	Spsb4	300950	ENSRNOG00000012862	NA	NA	predicted	0.61	elmmo
rno-miR-23b-3p	MIMAT0000793	Pom121	113975	ENSRNOG00000001449	NA	NA	predicted	0.61	elmmo
rno-miR-23b-3p	MIMAT0000793	Eps15	313474	ENSRNOG00000010299	NA	NA	predicted	0.61	elmmo
rno-miR-23b-3p	MIMAT0000793	Hsp90b1	362862	ENSRNOG00000026963	NA	NA	predicted	0.61	elmmo
rno-miR-23b-3p	MIMAT0000793	Hoxa11	100909443	ENSRNOG00000007627	NA	NA	predicted	0.61	elmmo
rno-miR-23b-3p	MIMAT0000793	Nuak2	100912269	ENSRNOG00000000034	NA	NA	predicted	0.61	elmmo
rno-miR-23b-3p	MIMAT0000793	Ihh	84399	ENSRNOG00000018059	NA	NA	predicted	0.61	elmmo
rno-miR-23b-3p	MIMAT0000793	Pax9	362741	ENSRNOG00000008826	NA	NA	predicted	0.61	elmmo
rno-miR-23b-3p	MIMAT0000793	Usp46	289584	ENSRNOG00000002106	NA	NA	predicted	0.61	elmmo
rno-miR-23b-3p	MIMAT0000793	Rpgrip1l	307724	ENSRNOG00000011829	NA	NA	predicted	0.61	elmmo
rno-miR-23b-3p	MIMAT0000793	B3gnt1	293667	ENSRNOG00000020110	NA	NA	predicted	0.61	elmmo
rno-miR-23b-3p	MIMAT0000793	Magohb	690303	ENSRNOG00000010316	NA	NA	predicted	0.61	elmmo
rno-miR-23b-3p	MIMAT0000793	Pou4f2	171355	ENSRNOG00000012167	NA	NA	predicted	0.61	elmmo
rno-miR-23b-3p	MIMAT0000793	Med12	679693	ENSRNOG00000003848	NA	NA	predicted	0.61	elmmo
rno-miR-23b-3p	MIMAT0000793	Dazap2	300235	ENSRNOG00000004628	NA	NA	predicted	0.61	elmmo
rno-miR-23b-3p	MIMAT0000793	Ptpn4	246116	ENSRNOG00000002625	NA	NA	predicted	0.61	elmmo
rno-miR-23b-3p	MIMAT0000793	Sf1	117855	ENSRNOG00000021085	NA	NA	predicted	0.61	elmmo
rno-miR-23b-3p	MIMAT0000793	Casp7	64026	ENSRNOG00000056216	NA	NA	predicted	0.61	elmmo
rno-miR-23b-3p	MIMAT0000793	Plcb4	25031	ENSRNOG00000033119	NA	NA	predicted	0.61	elmmo
rno-miR-23b-3p	MIMAT0000793	Capn6	83685	ENSRNOG00000004882	NA	NA	predicted	0.61	elmmo
rno-miR-23b-3p	MIMAT0000793	Fam134c	360632	ENSRNOG00000020056	NA	NA	predicted	0.61	elmmo
rno-miR-23b-3p	MIMAT0000793	Ntng1	295382	ENSRNOG00000031136	NA	NA	predicted	0.61	elmmo
rno-miR-23b-3p	MIMAT0000793	Car2	54231	ENSRNOG00000009629	NA	NA	predicted	0.61	elmmo
rno-miR-23b-3p	MIMAT0000793	Rnf138	102551223	ENSRNOG00000015645	NA	NA	predicted	0.61	elmmo
rno-miR-23b-3p	MIMAT0000793	Il6r	24499	ENSRNOG00000020811	NA	NA	predicted	0.61	elmmo
rno-miR-23b-3p	MIMAT0000793	Csnk1g3	64823	ENSRNOG00000016677	NA	NA	predicted	0.61	elmmo
rno-miR-23b-3p	MIMAT0000793	Pex11a	85249	ENSRNOG00000015003	NA	NA	predicted	0.61	elmmo
rno-miR-23b-3p	MIMAT0000793	Chst10	140568	ENSRNOG00000012815	NA	NA	predicted	0.61	elmmo
rno-miR-23b-3p	MIMAT0000793	Wsb1	303336	ENSRNOG00000012929	NA	NA	predicted	0.61	elmmo
rno-miR-23b-3p	MIMAT0000793	Tenm3	306451	ENSRNOG00000012802	NA	NA	predicted	0.61	elmmo
rno-miR-23b-3p	MIMAT0000793	Tfpi2	286926	ENSRNOG00000010513	NA	NA	predicted	0.61	elmmo
rno-miR-23b-3p	MIMAT0000793	Chst7	302302	ENSRNOG00000004258	NA	NA	predicted	0.61	elmmo
rno-miR-23b-3p	MIMAT0000793	Ptk2b	50646	ENSRNOG00000027839	NA	NA	predicted	0.61	elmmo
rno-miR-23b-3p	MIMAT0000793	Cipc	314330	ENSRNOG00000011111	NA	NA	predicted	0.61	elmmo
rno-miR-23b-3p	MIMAT0000793	Slc6a2	83511	ENSRNOG00000016311	NA	NA	predicted	0.61	elmmo
rno-miR-23b-3p	MIMAT0000793	Naa50	288108	ENSRNOG00000039017	NA	NA	predicted	0.61	elmmo
rno-miR-23b-3p	MIMAT0000793	RGD1309748	302913	ENSRNOG00000002545	NA	NA	predicted	0.61	elmmo
rno-miR-23b-3p	MIMAT0000793	B3galt2	686081	ENSRNOG00000003251	NA	NA	predicted	0.61	elmmo
rno-miR-23b-3p	MIMAT0000793	Lpar1	116744	ENSRNOG00000013656	NA	NA	predicted	0.61	elmmo
rno-miR-23b-3p	MIMAT0000793	Clk3	171305	ENSRNOG00000030126	NA	NA	predicted	0.61	elmmo
rno-miR-23b-3p	MIMAT0000793	Mpped2	362185	ENSRNOG00000004863	NA	NA	predicted	0.61	elmmo
rno-miR-23b-3p	MIMAT0000793	Mospd2	363463	ENSRNOG00000003350	NA	NA	predicted	0.61	elmmo
rno-miR-23b-3p	MIMAT0000793	Phf19	296653	ENSRNOG00000018874	NA	NA	predicted	0.61	elmmo
rno-miR-23b-3p	MIMAT0000793	Skp2	294790	ENSRNOG00000059059	NA	NA	predicted	0.61	elmmo
rno-miR-23b-3p	MIMAT0000793	Agap1	316611	ENSRNOG00000019476	NA	NA	predicted	0.61	elmmo
rno-miR-23b-3p	MIMAT0000793	Blcap	171113	ENSRNOG00000024437	NA	NA	predicted	0.61	elmmo
rno-miR-23b-3p	MIMAT0000793	Fam13b	291694	ENSRNOG00000020384	NA	NA	predicted	0.61	elmmo
rno-miR-23b-3p	MIMAT0000793	Tspan3	300733	ENSRNOG00000016474	NA	NA	predicted	0.61	elmmo
rno-miR-23b-3p	MIMAT0000793	Ccar1	361849	ENSRNOG00000000397	NA	NA	predicted	0.61	elmmo
rno-miR-23b-3p	MIMAT0000793	Epha5	79208	ENSRNOG00000002024	NA	NA	predicted	0.608	elmmo
rno-miR-23b-3p	MIMAT0000793	Fam131b	500102	ENSRNOG00000017149	NA	NA	predicted	0.608	elmmo
rno-miR-23b-3p	MIMAT0000793	N4bp1	291921	ENSRNOG00000015121	NA	NA	predicted	0.598	elmmo
rno-miR-23b-3p	MIMAT0000793	Zhx1	171159	ENSRNOG00000006412	NA	NA	predicted	0.598	elmmo
rno-miR-23b-3p	MIMAT0000793	Slc25a4	85333	ENSRNOG00000010830	NA	NA	predicted	0.598	elmmo
rno-miR-23b-3p	MIMAT0000793	Rnd3	295588	ENSRNOG00000004624	NA	NA	predicted	0.598	elmmo
rno-miR-23b-3p	MIMAT0000793	Melk	362510	ENSRNOG00000013598	NA	NA	predicted	0.587	elmmo
rno-miR-23b-3p	MIMAT0000793	RGD1304978	295985	ENSRNOG00000004926	NA	NA	predicted	0.584	elmmo
rno-miR-23b-3p	MIMAT0000793	Cggbp1	288353	ENSRNOG00000000718	NA	NA	predicted	0.584	elmmo
rno-miR-23b-3p	MIMAT0000793	Fam118b	315549	ENSRNOG00000011543	NA	NA	predicted	0.579	elmmo
rno-miR-23b-3p	MIMAT0000793	Impad1	100910881	ENSRNOG00000046647	NA	NA	predicted	0.576	elmmo
rno-miR-23b-3p	MIMAT0000793	LOC100910881	312952	ENSRNOG00000046647	NA	NA	predicted	0.576	elmmo
rno-miR-23b-3p	MIMAT0000793	Calcr	116506	ENSRNOG00000010053	NA	NA	predicted	0.576	elmmo
rno-miR-23b-3p	MIMAT0000793	Glce	363073	ENSRNOG00000025372	NA	NA	predicted	0.576	elmmo
rno-miR-23b-3p	MIMAT0000793	Lrp5	293649	ENSRNOG00000015911	NA	NA	predicted	0.554	elmmo
rno-miR-23b-3p	MIMAT0000793	Klhl14	364823	ENSRNOG00000015418	NA	NA	predicted	0.554	elmmo
rno-miR-23b-3p	MIMAT0000793	Sall3	364910	ENSRNOG00000026116	NA	NA	predicted	0.553	elmmo
rno-miR-23b-3p	MIMAT0000793	Camk2b	24245	ENSRNOG00000052080	NA	NA	predicted	0.548	elmmo
rno-miR-23b-3p	MIMAT0000793	Hes1	29577	ENSRNOG00000001720	NA	NA	predicted	0.548	elmmo
rno-miR-23b-3p	MIMAT0000793	Pik3c2a	361632	ENSRNOG00000020479	NA	NA	predicted	0.548	elmmo
rno-miR-23b-3p	MIMAT0000793	Lypla1	25514	ENSRNOG00000008320	NA	NA	predicted	0.548	elmmo
rno-miR-23b-3p	MIMAT0000793	Col4a1	290905	ENSRNOG00000016281	NA	NA	predicted	0.548	elmmo
rno-miR-23b-3p	MIMAT0000793	Prr13	363004	ENSRNOG00000042094	NA	NA	predicted	0.548	elmmo
rno-miR-23b-3p	MIMAT0000793	Hdgfrp3	252941	ENSRNOG00000019740	NA	NA	predicted	0.545	elmmo
rno-miR-23b-3p	MIMAT0000793	Eif3a	292148	ENSRNOG00000010117	NA	NA	predicted	0.539	elmmo
rno-miR-23b-3p	MIMAT0000793	LOC100909548	100909548	ENSRNOG00000014992	NA	NA	predicted	0.538	elmmo
rno-miR-23b-3p	MIMAT0000793	Sos1	313845	ENSRNOG00000007106	NA	NA	predicted	0.538	elmmo
rno-miR-23b-3p	MIMAT0000793	Arhgef5	140898	ENSRNOG00000005506	NA	NA	predicted	0.538	elmmo
rno-miR-23b-3p	MIMAT0000793	M6pr	100909548	ENSRNOG00000014992	NA	NA	predicted	0.538	elmmo
rno-miR-23b-3p	MIMAT0000793	Thsd7b	289007	ENSRNOG00000003878	NA	NA	predicted	0.538	elmmo
rno-miR-23b-3p	MIMAT0000793	RGD1565829	100909548	ENSRNOG00000014992	NA	NA	predicted	0.538	elmmo
rno-miR-23b-3p	MIMAT0000793	LOC690918	690918	ENSRNOG00000042246	NA	NA	predicted	0.538	elmmo
rno-miR-23b-3p	MIMAT0000793	Whamm	293057	ENSRNOG00000028113	NA	NA	predicted	0.535	elmmo
rno-miR-23b-3p	MIMAT0000793	Grem2	289264	ENSRNOG00000003616	NA	NA	predicted	0.535	elmmo
rno-miR-23b-3p	MIMAT0000793	Rfx6	100911315	ENSRNOG00000027949	NA	NA	predicted	0.535	elmmo
rno-miR-23b-3p	MIMAT0000793	Otub2	314405	ENSRNOG00000009117	NA	NA	predicted	0.535	elmmo
rno-miR-23b-3p	MIMAT0000793	Ccl7	287561	ENSRNOG00000000239	NA	NA	predicted	0.535	elmmo
rno-miR-23b-3p	MIMAT0000793	Cfdp1	313982	ENSRNOG00000019326	NA	NA	predicted	0.535	elmmo
rno-miR-23b-3p	MIMAT0000793	Tada1	360874	ENSRNOG00000003816	NA	NA	predicted	0.535	elmmo
rno-miR-23b-3p	MIMAT0000793	Fam196a	100233213	ENSRNOG00000033881	NA	NA	predicted	0.535	elmmo
rno-miR-23b-3p	MIMAT0000793	Npy5r	25340	ENSRNOG00000014172	NA	NA	predicted	0.535	elmmo
rno-miR-23b-3p	MIMAT0000793	Atmin	315037	ENSRNOG00000011422	NA	NA	predicted	0.535	elmmo
rno-miR-23b-3p	MIMAT0000793	Adamts9	312566	ENSRNOG00000023257	NA	NA	predicted	0.535	elmmo
rno-miR-23b-3p	MIMAT0000793	Cib2	300719	ENSRNOG00000059834	NA	NA	predicted	0.535	elmmo
rno-miR-23b-3p	MIMAT0000793	Ccnh	84389	ENSRNOG00000031656	NA	NA	predicted	0.535	elmmo
rno-miR-23b-3p	MIMAT0000793	Pcf11	361605	ENSRNOG00000009891	NA	NA	predicted	0.535	elmmo
rno-miR-23b-3p	MIMAT0000793	Ppp1r13b	314465	ENSRNOG00000012653	NA	NA	predicted	0.535	elmmo
rno-miR-23b-3p	MIMAT0000793	Sostdc1	266803	ENSRNOG00000005770	NA	NA	predicted	0.535	elmmo
rno-miR-23b-3p	MIMAT0000793	Pwwp2a	303060	ENSRNOG00000003936	NA	NA	predicted	0.535	elmmo
rno-miR-23b-3p	MIMAT0000793	Gcc1	100361513	ENSRNOG00000007792	NA	NA	predicted	0.535	elmmo
rno-miR-23b-3p	MIMAT0000793	Tnk2	303882	ENSRNOG00000001769	NA	NA	predicted	0.535	elmmo
rno-miR-23b-3p	MIMAT0000793	Rcn1	362182	ENSRNOG00000013452	NA	NA	predicted	0.535	elmmo
rno-miR-23b-3p	MIMAT0000793	Chic2	83835	ENSRNOG00000002267	NA	NA	predicted	0.526	elmmo
rno-miR-23b-3p	MIMAT0000793	Slc12a2	83629	ENSRNOG00000015971	NA	NA	predicted	0.524	elmmo
rno-miR-23b-3p	MIMAT0000793	Fam46a	300870	ENSRNOG00000010240	NA	NA	predicted	0.522	elmmo
rno-miR-23b-3p	MIMAT0000793	Nrip1	304157	ENSRNOG00000001585	NA	NA	predicted	0.517	elmmo
rno-miR-23b-3p	MIMAT0000793	Map7	293016	ENSRNOG00000012701	NA	NA	predicted	0.517	elmmo
rno-miR-23b-3p	MIMAT0000793	Ppp2ca	24672	ENSRNOG00000005389	NA	NA	predicted	0.516	elmmo
rno-miR-23b-3p	MIMAT0000793	Katnal1	100910196	ENSRNOG00000000916	NA	NA	predicted	0.516	elmmo
rno-miR-23b-3p	MIMAT0000793	LOC100910196	288449	ENSRNOG00000000916	NA	NA	predicted	0.516	elmmo
rno-miR-23b-3p	MIMAT0000793	Tril	362364	ENSRNOG00000026941	NA	NA	predicted	0.49	elmmo
rno-miR-23b-3p	MIMAT0000793	Azin1	58961	ENSRNOG00000005333	NA	NA	predicted	0.484	elmmo
rno-miR-23b-3p	MIMAT0000793	Pds5b	304218	ENSRNOG00000001098	NA	NA	predicted	0.484	elmmo
rno-miR-23b-3p	MIMAT0000793	Zbtb26	311910	ENSRNOG00000009346	NA	NA	predicted	0.484	elmmo
rno-miR-23b-3p	MIMAT0000793	Dlst	299201	ENSRNOG00000005061	NA	NA	predicted	0.484	elmmo
rno-miR-23b-3p	MIMAT0000793	Mcm3ap	294339	ENSRNOG00000001272	NA	NA	predicted	0.484	elmmo
rno-miR-23b-3p	MIMAT0000793	Foxo4	302415	ENSRNOG00000033316	NA	NA	predicted	0.484	elmmo
rno-miR-23b-3p	MIMAT0000793	Cttnbp2nl	310760	ENSRNOG00000014479	NA	NA	predicted	0.476	elmmo
rno-miR-23b-3p	MIMAT0000793	Tmem127	311405	ENSRNOG00000022727	NA	NA	predicted	0.47	elmmo
rno-miR-23b-3p	MIMAT0000793	Serinc4	311358	ENSRNOG00000015499	NA	NA	predicted	0.47	elmmo
rno-miR-23b-3p	MIMAT0000793	Sumf1	362409	ENSRNOG00000006813	NA	NA	predicted	0.47	elmmo
rno-miR-23b-3p	MIMAT0000793	Cstf1	311670	ENSRNOG00000004775	NA	NA	predicted	0.469	elmmo
rno-miR-23b-3p	MIMAT0000793	Crisp1	654517	ENSRNOG00000013612	NA	NA	predicted	0.446	elmmo
rno-miR-23b-3p	MIMAT0000793	Nts	299757	ENSRNOG00000004179	NA	NA	predicted	0.445	elmmo
rno-miR-23b-3p	MIMAT0000793	Ptn	24924	ENSRNOG00000011946	NA	NA	predicted	0.445	elmmo
rno-miR-23b-3p	MIMAT0000793	Arel1	299197	ENSRNOG00000004382	NA	NA	predicted	0.445	elmmo
rno-miR-23b-3p	MIMAT0000793	Ccdc82	300359	ENSRNOG00000005713	NA	NA	predicted	0.445	elmmo
rno-miR-23b-3p	MIMAT0000793	Rab10	50993	ENSRNOG00000047088	NA	NA	predicted	0.445	elmmo
rno-miR-23b-3p	MIMAT0000793	Tjp2	115769	ENSRNOG00000015030	NA	NA	predicted	0.445	elmmo
rno-miR-23b-3p	MIMAT0000793	Cbln1	498922	ENSRNOG00000000010	NA	NA	predicted	0.445	elmmo
rno-miR-23b-3p	MIMAT0000793	Tmem169	690294	ENSRNOG00000016091	NA	NA	predicted	0.445	elmmo
rno-miR-23b-3p	MIMAT0000793	Myl12b	50685	ENSRNOG00000015733	NA	NA	predicted	0.445	elmmo
rno-miR-23b-3p	MIMAT0000793	Dnajb12	294513	ENSRNOG00000030408	NA	NA	predicted	0.445	elmmo
rno-miR-23b-3p	MIMAT0000793	Timm8b	64372	ENSRNOG00000009888	NA	NA	predicted	0.445	elmmo
rno-miR-23b-3p	MIMAT0000793	Znrf2	362367	ENSRNOG00000049057	NA	NA	predicted	0.445	elmmo
rno-miR-23b-3p	MIMAT0000793	Tmem39b	362608	ENSRNOG00000023746	NA	NA	predicted	0.445	elmmo
rno-miR-23b-3p	MIMAT0000793	Rwdd4	502084	ENSRNOG00000022500	NA	NA	predicted	0.445	elmmo
rno-miR-23b-3p	MIMAT0000793	Snx25	306471	ENSRNOG00000011116	NA	NA	predicted	0.445	elmmo
rno-miR-23b-3p	MIMAT0000793	Hsph1	288444	ENSRNOG00000000902	NA	NA	predicted	0.445	elmmo
rno-miR-23b-3p	MIMAT0000793	Ppfibp1	312855	ENSRNOG00000031709	NA	NA	predicted	0.445	elmmo
rno-miR-23b-3p	MIMAT0000793	Ing3	312154	ENSRNOG00000005496	NA	NA	predicted	0.445	elmmo
rno-miR-23b-3p	MIMAT0000793	Cpm	314855	ENSRNOG00000034134	NA	NA	predicted	0.445	elmmo
rno-miR-23b-3p	MIMAT0000793	Zkscan1	498160	ENSRNOG00000001335	NA	NA	predicted	0.445	elmmo
rno-miR-23b-3p	MIMAT0000793	Ppm1d	287585	ENSRNOG00000003329	NA	NA	predicted	0.445	elmmo
rno-miR-23b-3p	MIMAT0000793	Ublcp1	360514	ENSRNOG00000004477	NA	NA	predicted	0.445	elmmo
rno-miR-23b-3p	MIMAT0000793	Lrrc40	310946	ENSRNOG00000011555	NA	NA	predicted	0.445	elmmo
rno-miR-23b-3p	MIMAT0000793	Zbtb43	311872	ENSRNOG00000017017	NA	NA	predicted	0.428	elmmo
rno-miR-23b-3p	MIMAT0000793	Uhrf1bp1l	100910056	ENSRNOG00000050317	NA	NA	predicted	0.426	elmmo
rno-miR-23b-3p	MIMAT0000793	LOC100910056	363009	ENSRNOG00000050317	NA	NA	predicted	0.426	elmmo
rno-miR-23b-3p	MIMAT0000793	Igsf8	304979	ENSRNOG00000007604	NA	NA	predicted	0.426	elmmo
rno-miR-23b-3p	MIMAT0000793	Armc1	294948	ENSRNOG00000013253	NA	NA	predicted	0.416	elmmo
rno-miR-23b-3p	MIMAT0000793	Oaz3	689588	ENSRNOG00000020863	NA	NA	predicted	0.416	elmmo
rno-miR-23b-3p	MIMAT0000793	Usp53	295425	ENSRNOG00000014660	NA	NA	predicted	0.407	elmmo
rno-miR-23b-3p	MIMAT0000793	Elavl2		ENSRNOG00000006853	NA	NA	predicted	0.407	elmmo
rno-miR-23b-3p	MIMAT0000793	Cav2	363425	ENSRNOG00000057713	NA	NA	predicted	0.407	elmmo
rno-miR-23b-3p	MIMAT0000793	RGD1306941	316406	ENSRNOG00000010185	NA	NA	predicted	0.407	elmmo
rno-miR-23b-3p	MIMAT0000793	Htr2c	25187	ENSRNOG00000030877	NA	NA	predicted	0.407	elmmo
rno-miR-23b-3p	MIMAT0000793	Uba6	305268	ENSRNOG00000021931	NA	NA	predicted	0.407	elmmo
rno-miR-23b-3p	MIMAT0000793	Rab11fip4	303337	ENSRNOG00000014135	NA	NA	predicted	0.405	elmmo
rno-miR-23b-3p	MIMAT0000793	Fam122b	100909732	ENSRNOG00000050146	NA	NA	predicted	0.405	elmmo
rno-miR-23b-3p	MIMAT0000793	LOC100909732	501647	ENSRNOG00000050146	NA	NA	predicted	0.405	elmmo
rno-miR-23b-3p	MIMAT0000793	Naa30	498489	ENSRNOG00000014192	NA	NA	predicted	0.405	elmmo
rno-miR-23b-3p	MIMAT0000793	Stk38	361813	ENSRNOG00000000519	NA	NA	predicted	0.403	elmmo
rno-miR-23b-3p	MIMAT0000793	RGD1307100	294978	ENSRNOG00000038436	NA	NA	predicted	0.399	elmmo
rno-miR-23b-3p	MIMAT0000793	Irx2	306657	ENSRNOG00000012742	NA	NA	predicted	0.395	elmmo
rno-miR-23b-3p	MIMAT0000793	Peli2	305835	ENSRNOG00000012363	NA	NA	predicted	0.395	elmmo
rno-miR-23b-3p	MIMAT0000793	Gdi1	25183	ENSRNOG00000056870	NA	NA	predicted	0.393	elmmo
rno-miR-23b-3p	MIMAT0000793	Cpsf6	299811	ENSRNOG00000005927	NA	NA	predicted	0.393	elmmo
rno-miR-23b-3p	MIMAT0000793	Zfp458	499563	ENSRNOG00000017986	NA	NA	predicted	0.384	elmmo
rno-miR-23b-3p	MIMAT0000793	Cpsf4	304277	ENSRNOG00000000985	NA	NA	predicted	0.381	elmmo
rno-miR-23b-3p	MIMAT0000793	Pitpna	29525	ENSRNOG00000003846	NA	NA	predicted	0.381	elmmo
rno-miR-23b-3p	MIMAT0000793	Lemd3	680066	ENSRNOG00000024027	NA	NA	predicted	0.381	elmmo
rno-miR-23b-3p	MIMAT0000793	Zfp266	367034	ENSRNOG00000034037	NA	NA	predicted	0.381	elmmo
rno-miR-23b-3p	MIMAT0000793	LOC100233176	299261	ENSRNOG00000033970	NA	NA	predicted	0.372	elmmo
rno-miR-23b-3p	MIMAT0000793	Moap1	299261	ENSRNOG00000033970	NA	NA	predicted	0.372	elmmo
rno-miR-23b-3p	MIMAT0000793	Dpp4	25253	ENSRNOG00000030763	NA	NA	predicted	0.37	elmmo
rno-miR-23b-3p	MIMAT0000793	Eno1	24333	ENSRNOG00000017895	NA	NA	predicted	0.369	elmmo
rno-miR-23b-3p	MIMAT0000793	Scyl2	314717	ENSRNOG00000024955	NA	NA	predicted	0.369	elmmo
rno-miR-23b-3p	MIMAT0000793	Rerg	502916	ENSRNOG00000027592	NA	NA	predicted	0.369	elmmo
rno-miR-23b-3p	MIMAT0000793	Grm1	24414	ENSRNOG00000014290	NA	NA	predicted	0.369	elmmo
rno-miR-23b-3p	MIMAT0000793	Clec1a	500337	ENSRNOG00000060460	NA	NA	predicted	0.369	elmmo
rno-miR-23b-3p	MIMAT0000793	Senp7	288167	ENSRNOG00000001616	NA	NA	predicted	0.369	elmmo
rno-miR-23b-3p	MIMAT0000793	LOC100360453	100360453	ENSRNOG00000011814	NA	NA	predicted	0.369	elmmo
rno-miR-23b-3p	MIMAT0000793	Aak1	500244	ENSRNOG00000018317	NA	NA	predicted	0.369	elmmo
rno-miR-23b-3p	MIMAT0000793	Nedd9	291044	ENSRNOG00000014548	NA	NA	predicted	0.369	elmmo
rno-miR-23b-3p	MIMAT0000793	Mrpl43	309440	ENSRNOG00000014890	NA	NA	predicted	0.369	elmmo
rno-miR-23b-3p	MIMAT0000793	Caap1	500501	ENSRNOG00000007299	NA	NA	predicted	0.369	elmmo
rno-miR-23b-3p	MIMAT0000793	Phb2	114766	ENSRNOG00000012999	NA	NA	predicted	0.369	elmmo
rno-miR-23b-3p	MIMAT0000793	Map3k7cl	304131	ENSRNOG00000001584	NA	NA	predicted	0.369	elmmo
rno-miR-23b-3p	MIMAT0000793	Slc25a16	361836	ENSRNOG00000000387	NA	NA	predicted	0.369	elmmo
rno-miR-23b-3p	MIMAT0000793	Pnldc1	361478	ENSRNOG00000023140	NA	NA	predicted	0.369	elmmo
rno-miR-23b-3p	MIMAT0000793	Gcnt1	64043	ENSRNOG00000050534	NA	NA	predicted	0.369	elmmo
rno-miR-23b-3p	MIMAT0000793	Cbx3	100360453	ENSRNOG00000011814	NA	NA	predicted	0.369	elmmo
rno-miR-23b-3p	MIMAT0000793	G3bp1	171092	ENSRNOG00000013186	NA	NA	predicted	0.369	elmmo
rno-miR-23b-3p	MIMAT0000793	Fyttd1	360726	ENSRNOG00000034233	NA	NA	predicted	0.369	elmmo
rno-miR-23b-3p	MIMAT0000793	Tmem161b	309953	ENSRNOG00000032414	NA	NA	predicted	0.369	elmmo
rno-miR-23b-3p	MIMAT0000793	Gas2	499156	ENSRNOG00000016717	NA	NA	predicted	0.369	elmmo
rno-miR-23b-3p	MIMAT0000793	Rasgef1a	312664	ENSRNOG00000031671	NA	NA	predicted	0.369	elmmo
rno-miR-23b-3p	MIMAT0000793	Col4a5	363457	ENSRNOG00000018951	NA	NA	predicted	0.369	elmmo
rno-miR-23b-3p	MIMAT0000793	LOC100360260	100360453	ENSRNOG00000011814	NA	NA	predicted	0.369	elmmo
rno-miR-23b-3p	MIMAT0000793	Baz1b	368002	ENSRNOG00000001453	NA	NA	predicted	0.369	elmmo
rno-miR-23b-3p	MIMAT0000793	Swt1	289088	ENSRNOG00000032258	NA	NA	predicted	0.357	elmmo
rno-miR-23b-3p	MIMAT0000793	Gcnt2	306860	ENSRNOG00000023778	NA	NA	predicted	0.357	elmmo
rno-miR-23b-3p	MIMAT0000793	B4galt4	303923	ENSRNOG00000003114	NA	NA	predicted	0.357	elmmo
rno-miR-23b-3p	MIMAT0000793	Vps13a	309243	ENSRNOG00000025539	NA	NA	predicted	0.357	elmmo
rno-miR-23b-3p	MIMAT0000793	Pla2r1	295631	ENSRNOG00000008129	NA	NA	predicted	0.357	elmmo
rno-miR-23b-3p	MIMAT0000793	Tal1	313507	ENSRNOG00000025051	NA	NA	predicted	0.357	elmmo
rno-miR-23b-3p	MIMAT0000793	Arg1	29221	ENSRNOG00000013304	NA	NA	predicted	0.357	elmmo
rno-miR-23b-3p	MIMAT0000793	Rfwd2	360860	ENSRNOG00000042492	NA	NA	predicted	0.357	elmmo
rno-miR-23b-3p	MIMAT0000793	Hs2st1	292155	ENSRNOG00000012549	NA	NA	predicted	0.341	elmmo
rno-miR-23b-3p	MIMAT0000793	Tbc1d15	366896	ENSRNOG00000003889	NA	NA	predicted	0.336	elmmo
rno-miR-23b-3p	MIMAT0000793	Fam171a2	100361389	ENSRNOG00000021041	NA	NA	predicted	0.336	elmmo
rno-miR-23b-3p	MIMAT0000793	Rnf19a	362900	ENSRNOG00000009658	NA	NA	predicted	0.315	elmmo
rno-miR-23b-3p	MIMAT0000793	Rxrg	102553986	ENSRNOG00000004537	NA	NA	predicted	0.315	elmmo
rno-miR-23b-3p	MIMAT0000793	Sorcs3	294043	ENSRNOG00000028832	NA	NA	predicted	0.315	elmmo
rno-miR-23b-3p	MIMAT0000793	Rps6ka5	314384	ENSRNOG00000004362	NA	NA	predicted	0.315	elmmo
rno-miR-23b-3p	MIMAT0000793	Mboat2	313997	ENSRNOG00000061050	NA	NA	predicted	0.315	elmmo
rno-miR-23b-3p	MIMAT0000793	Chuk	309361	ENSRNOG00000022485	NA	NA	predicted	0.305	elmmo
rno-miR-23b-3p	MIMAT0000793	Gpsm1	246254	ENSRNOG00000018666	NA	NA	predicted	0.305	elmmo
rno-miR-23b-3p	MIMAT0000793	Esrp1	500409	ENSRNOG00000008184	NA	NA	predicted	0.3	elmmo
rno-miR-23b-3p	MIMAT0000793	Usp6nl	291309	ENSRNOG00000017644	NA	NA	predicted	0.3	elmmo
rno-miR-23b-3p	MIMAT0000793	Ap1s1	360785	ENSRNOG00000001415	NA	NA	predicted	0.3	elmmo
rno-miR-23b-3p	MIMAT0000793	Armc8	315949	ENSRNOG00000014521	NA	NA	predicted	0.286	elmmo
rno-miR-23b-3p	MIMAT0000793	Slc25a22	309111	ENSRNOG00000018450	NA	NA	predicted	0.286	elmmo
rno-miR-23b-3p	MIMAT0000793	Fas	246097	ENSRNOG00000019142	NA	NA	predicted	0.286	elmmo
rno-miR-23b-3p	MIMAT0000793	Tmem25	689172	ENSRNOG00000014218	NA	NA	predicted	0.286	elmmo
rno-miR-23b-3p	MIMAT0000793	Gpr22	298944	ENSRNOG00000008423	NA	NA	predicted	0.286	elmmo
rno-miR-23b-3p	MIMAT0000793	Rab6a	84379	ENSRNOG00000018176	NA	NA	predicted	0.286	elmmo
rno-miR-23b-3p	MIMAT0000793	Gpr180	306165	ENSRNOG00000009766	NA	NA	predicted	0.286	elmmo
rno-miR-23b-3p	MIMAT0000793	Jph1	297748	ENSRNOG00000006110	NA	NA	predicted	0.286	elmmo
rno-miR-23b-3p	MIMAT0000793	Naa60	363545	ENSRNOG00000007280	NA	NA	predicted	0.286	elmmo
rno-miR-23b-3p	MIMAT0000793	Cacnb2	116600	ENSRNOG00000018378	NA	NA	predicted	0.286	elmmo
rno-miR-23b-3p	MIMAT0000793	Mgat4c	299756	ENSRNOG00000004149	NA	NA	predicted	0.286	elmmo
rno-miR-23b-3p	MIMAT0000793	Col6a1	294337	ENSRNOG00000001249	NA	NA	predicted	0.286	elmmo
rno-miR-23b-3p	MIMAT0000793	LOC100911440	309111	ENSRNOG00000018450	NA	NA	predicted	0.286	elmmo
rno-miR-23b-3p	MIMAT0000793	Dcbld1	309773	ENSRNOG00000000407	NA	NA	predicted	0.286	elmmo
rno-miR-23b-3p	MIMAT0000793	LOC684509	691001	ENSRNOG00000014224	NA	NA	predicted	0.286	elmmo
rno-miR-23b-3p	MIMAT0000793	Senp6	300860	ENSRNOG00000024336	NA	NA	predicted	0.286	elmmo
rno-miR-23b-3p	MIMAT0000793	Slc9a1	24782	ENSRNOG00000007982	NA	NA	predicted	0.286	elmmo
rno-miR-23b-3p	MIMAT0000793	Uqcrfs1	291103	ENSRNOG00000018281	NA	NA	predicted	0.286	elmmo
rno-miR-23b-3p	MIMAT0000793	Six4	299138	ENSRNOG00000007250	NA	NA	predicted	0.286	elmmo
rno-miR-23b-3p	MIMAT0000793	Aff4	303132	ENSRNOG00000006965	NA	NA	predicted	0.286	elmmo
rno-miR-23b-3p	MIMAT0000793	Nus1	294400	ENSRNOG00000000411	NA	NA	predicted	0.286	elmmo
rno-miR-23b-3p	MIMAT0000793	Tmem170a	498953	ENSRNOG00000049019	NA	NA	predicted	0.286	elmmo
rno-miR-23b-3p	MIMAT0000793	Slc7a11	310392	ENSRNOG00000010210	NA	NA	predicted	0.286	elmmo
rno-miR-23b-3p	MIMAT0000793	Dhrs11	360583	ENSRNOG00000027891	NA	NA	predicted	0.286	elmmo
rno-miR-23b-3p	MIMAT0000793	Asah2	114104	ENSRNOG00000012196	NA	NA	predicted	0.286	elmmo
rno-miR-23b-3p	MIMAT0000793	Ndufa3	691001	ENSRNOG00000014224	NA	NA	predicted	0.286	elmmo
rno-miR-23b-3p	MIMAT0000793	Exoc3l4	299338	ENSRNOG00000010111	NA	NA	predicted	0.286	elmmo
rno-miR-23b-3p	MIMAT0000793	RGD1310352	303122	ENSRNOG00000006148	NA	NA	predicted	0.286	elmmo
rno-miR-23b-3p	MIMAT0000793	Ctps1	313560	ENSRNOG00000009963	NA	NA	predicted	0.286	elmmo
rno-miR-23b-3p	MIMAT0000793	Fshr	25449	ENSRNOG00000016783	NA	NA	predicted	0.286	elmmo
rno-miR-23b-3p	MIMAT0000793	Sel1l	314352	ENSRNOG00000004464	NA	NA	predicted	0.284	elmmo
rno-miR-23b-3p	MIMAT0000793	Epn2	60443	ENSRNOG00000060550	NA	NA	predicted	0.283	elmmo
rno-miR-23b-3p	MIMAT0000793	Sh3bgrl	302363	ENSRNOG00000002280	NA	NA	predicted	0.283	elmmo
rno-miR-23b-3p	MIMAT0000793	Grpel2	688777	ENSRNOG00000042682	NA	NA	predicted	0.258	elmmo
rno-miR-23b-3p	MIMAT0000793	Dcun1d4	360928	ENSRNOG00000002152	NA	NA	predicted	0.258	elmmo
rno-miR-23b-3p	MIMAT0000793	Txn2	79462	ENSRNOG00000005614	NA	NA	predicted	0.258	elmmo
rno-miR-23b-3p	MIMAT0000793	Cyp39a1	301264	ENSRNOG00000010519	NA	NA	predicted	0.233	elmmo
rno-miR-23b-3p	MIMAT0000793	Fam81a	315789	ENSRNOG00000057501	NA	NA	predicted	0.231	elmmo
rno-miR-23b-3p	MIMAT0000793	Adam9	290834	ENSRNOG00000017231	NA	NA	predicted	0.226	elmmo
rno-miR-23b-3p	MIMAT0000793	Mier2	362841	ENSRNOG00000000175	NA	NA	predicted	0.221	elmmo
rno-miR-23b-3p	MIMAT0000793	Map3k8	116596	ENSRNOG00000016378	NA	NA	predicted	0.217	elmmo
rno-miR-23b-3p	MIMAT0000793	Slc38a2	29642	ENSRNOG00000006305	NA	NA	predicted	0.217	elmmo
rno-miR-23b-3p	MIMAT0000793	Txnrd1	58819	ENSRNOG00000009088	NA	NA	predicted	0.211	elmmo
rno-miR-23b-3p	MIMAT0000793	Wipf1	117538	ENSRNOG00000018406	NA	NA	predicted	0.211	elmmo
rno-miR-23b-3p	MIMAT0000793	Ppif	282819	ENSRNOG00000010558	NA	NA	predicted	0.211	elmmo
rno-miR-23b-3p	MIMAT0000793	Hcrtr2	25605	ENSRNOG00000011251	NA	NA	predicted	0.209	elmmo
rno-miR-23b-3p	MIMAT0000793	Magee1	317232	ENSRNOG00000002660	NA	NA	predicted	0.209	elmmo
rno-miR-23b-3p	MIMAT0000793	LOC100910164	688581	ENSRNOG00000028176	NA	NA	predicted	0.207	elmmo
rno-miR-23b-3p	MIMAT0000793	Elmod2	688581	ENSRNOG00000028176	NA	NA	predicted	0.207	elmmo
rno-miR-23b-3p	MIMAT0000793	Gnpnat1	498486	ENSRNOG00000008641	NA	NA	predicted	0.206	elmmo
rno-miR-23b-3p	MIMAT0000793	Dstyk	304791	ENSRNOG00000021298	NA	NA	predicted	0.206	elmmo
rno-miR-23b-3p	MIMAT0000793	Yipf5	361315	ENSRNOG00000014564	NA	NA	predicted	0.205	elmmo
rno-miR-23b-3p	MIMAT0000793	Nab1	64824	ENSRNOG00000012959	NA	NA	predicted	0.204	elmmo
rno-miR-23b-3p	MIMAT0000793	Tor1a	266606	ENSRNOG00000006894	NA	NA	predicted	0.204	elmmo
rno-miR-23b-3p	MIMAT0000793	Il13ra1	100360218	ENSRNOG00000013170	NA	NA	predicted	0.202	elmmo
rno-miR-23b-3p	MIMAT0000793	LOC100360218	252963	ENSRNOG00000013170	NA	NA	predicted	0.202	elmmo
rno-miR-23b-3p	MIMAT0000793	Ssr2	295235	ENSRNOG00000019940	NA	NA	predicted	0.197	elmmo
rno-miR-23b-3p	MIMAT0000793	Eid2	685691	ENSRNOG00000019310	NA	NA	predicted	0.197	elmmo
rno-miR-23b-3p	MIMAT0000793	Snupn	316108	ENSRNOG00000005426	NA	NA	predicted	0.197	elmmo
rno-miR-23b-3p	MIMAT0000793	Cox16	100302447	ENSRNOG00000047115	NA	NA	predicted	0.197	elmmo
rno-miR-23b-3p	MIMAT0000793	Tmtc3	314785	ENSRNOG00000006749	NA	NA	predicted	0.197	elmmo
rno-miR-23b-3p	MIMAT0000793	Ldhb	24534	ENSRNOG00000013000	NA	NA	predicted	0.197	elmmo
rno-miR-23b-3p	MIMAT0000793	Prr5	315189	ENSRNOG00000012475	NA	NA	predicted	0.197	elmmo
rno-miR-23b-3p	MIMAT0000793	Eddm3b	290032	ENSRNOG00000052100	NA	NA	predicted	0.195	elmmo
rno-miR-23b-3p	MIMAT0000793	Glis2	302946	ENSRNOG00000004766	NA	NA	predicted	0.195	elmmo
rno-miR-23b-3p	MIMAT0000793	Lpgat1	679692	ENSRNOG00000004402	NA	NA	predicted	0.195	elmmo
rno-miR-23b-3p	MIMAT0000793	Car8	297814	ENSRNOG00000005669	NA	NA	predicted	0.195	elmmo
rno-miR-23b-3p	MIMAT0000793	Ackr2	140473	ENSRNOG00000019472	NA	NA	predicted	0.192	elmmo
rno-miR-23b-3p	MIMAT0000793	Tesb	414826	ENSRNOG00000039398	NA	NA	predicted	0.192	elmmo
rno-miR-23b-3p	MIMAT0000793	Klhl13	313445	ENSRNOG00000014029	NA	NA	predicted	0.192	elmmo
rno-miR-23b-3p	MIMAT0000793	Tek	89804	ENSRNOG00000008587	NA	NA	predicted	0.192	elmmo
rno-miR-23b-3p	MIMAT0000793	Arl6ip6	499798	ENSRNOG00000005074	NA	NA	predicted	0.19	elmmo
rno-miR-23b-3p	MIMAT0000793	Paxbp1	681004	ENSRNOG00000002036	NA	NA	predicted	0.19	elmmo
rno-miR-23b-3p	MIMAT0000793	Art1	308873	ENSRNOG00000020251	NA	NA	predicted	0.19	elmmo
rno-miR-23b-3p	MIMAT0000793	Cyyr1	304138	ENSRNOG00000001544	NA	NA	predicted	0.19	elmmo
rno-miR-23b-3p	MIMAT0000793	Ubox5	296161	ENSRNOG00000021230	NA	NA	predicted	0.19	elmmo
rno-miR-23b-3p	MIMAT0000793	Plekha8	500132	ENSRNOG00000009971	NA	NA	predicted	0.19	elmmo
rno-miR-23b-3p	MIMAT0000793	Akr1d1	192242	ENSRNOG00000013004	NA	NA	predicted	0.19	elmmo
rno-miR-23b-3p	MIMAT0000793	Cdk17	314743	ENSRNOG00000004148	NA	NA	predicted	0.19	elmmo
rno-miR-23b-3p	MIMAT0000793	Mapk1ip1l	361028	ENSRNOG00000011611	NA	NA	predicted	0.19	elmmo
rno-miR-23b-3p	MIMAT0000793	Zfp9	100158232	ENSRNOG00000006726	NA	NA	predicted	0.19	elmmo
rno-miR-23b-3p	MIMAT0000793	Cdh2	83501	ENSRNOG00000015602	NA	NA	predicted	0.19	elmmo
rno-miR-23b-3p	MIMAT0000793	Slc25a36	364991	ENSRNOG00000013802	NA	NA	predicted	0.19	elmmo
rno-miR-23b-3p	MIMAT0000793	Actr3	362298	ENSRNOG00000003206	NA	NA	predicted	0.19	elmmo
rno-miR-23b-3p	MIMAT0000793	Atp6v1a	685232	ENSRNOG00000001992	NA	NA	predicted	0.19	elmmo
rno-miR-23b-3p	MIMAT0000793	Txndc17	287474	ENSRNOG00000014072	NA	NA	predicted	0.19	elmmo
rno-miR-23b-3p	MIMAT0000793	RGD1560455	302377	ENSRNOG00000037838	NA	NA	predicted	0.19	elmmo
rno-miR-23b-3p	MIMAT0000793	Rsrp1	362626	ENSRNOG00000017309	NA	NA	predicted	0.19	elmmo
rno-miR-23b-3p	MIMAT0000793	LOC100362216	100362216	ENSRNOG00000017557	NA	NA	predicted	0.19	elmmo
rno-miR-23b-3p	MIMAT0000793	Pcsk1	100911216	ENSRNOG00000011107	NA	NA	predicted	0.19	elmmo
rno-miR-23b-3p	MIMAT0000793	Acer2	313339	ENSRNOG00000007637	NA	NA	predicted	0.19	elmmo
rno-miR-23b-3p	MIMAT0000793	Ahcyl1	362013	ENSRNOG00000018569	NA	NA	predicted	0.19	elmmo
rno-miR-23b-3p	MIMAT0000793	Hltf	295568	ENSRNOG00000000082	NA	NA	predicted	0.19	elmmo
rno-miR-23b-3p	MIMAT0000793	Ubr7	314399	ENSRNOG00000008108	NA	NA	predicted	0.19	elmmo
rno-miR-23b-3p	MIMAT0000793	LOC100911216	25204	ENSRNOG00000011107	NA	NA	predicted	0.19	elmmo
rno-miR-23b-3p	MIMAT0000793	Slc7a6os	246187	ENSRNOG00000020049	NA	NA	predicted	0.19	elmmo
rno-miR-23b-3p	MIMAT0000793	Ppp1r16a	362944	ENSRNOG00000015450	NA	NA	predicted	0.19	elmmo
rno-miR-23b-3p	MIMAT0000793	Zfp157	360775	ENSRNOG00000001323	NA	NA	predicted	0.19	elmmo
rno-miR-23b-3p	MIMAT0000793	Crat	311849	ENSRNOG00000018145	NA	NA	predicted	0.19	elmmo
rno-miR-23b-3p	MIMAT0000793	Nras	24605	ENSRNOG00000023079	NA	NA	predicted	0.19	elmmo
rno-miR-23b-3p	MIMAT0000793	Capza1	691149	ENSRNOG00000013538	NA	NA	predicted	0.19	elmmo
rno-miR-23b-3p	MIMAT0000793	Ube2j2	298689	ENSRNOG00000019749	NA	NA	predicted	0.19	elmmo
rno-miR-23b-3p	MIMAT0000793	Cd38	25668	ENSRNOG00000003069	NA	NA	predicted	0.19	elmmo
rno-miR-23b-3p	MIMAT0000793	Ptbp3	83515	ENSRNOG00000016334	NA	NA	predicted	0.19	elmmo
rno-miR-23b-3p	MIMAT0000793	LOC688390	688390	ENSRNOG00000026080	NA	NA	predicted	0.19	elmmo
rno-miR-23b-3p	MIMAT0000793	Cers3	499174	ENSRNOG00000013823	NA	NA	predicted	0.19	elmmo
rno-miR-23b-3p	MIMAT0000793	RGD1307916	362433	ENSRNOG00000042494	NA	NA	predicted	0.19	elmmo
rno-miR-23b-3p	MIMAT0000793	Brcc3	316794	ENSRNOG00000048061	NA	NA	predicted	0.19	elmmo
rno-miR-23b-3p	MIMAT0000793	Cox7c	100188937	ENSRNOG00000030237	NA	NA	predicted	0.19	elmmo
rno-miR-23b-3p	MIMAT0000793	Slc25a36l1	364991	ENSRNOG00000013802	NA	NA	predicted	0.19	elmmo
rno-miR-23b-3p	MIMAT0000793	Pex26	297570	ENSRNOG00000049982	NA	NA	predicted	0.19	elmmo
rno-miR-23b-3p	MIMAT0000793	Dgkq	100361138	ENSRNOG00000024112	NA	NA	predicted	0.19	elmmo
rno-miR-23b-3p	MIMAT0000793	Bzw1	363232	ENSRNOG00000013977	NA	NA	predicted	0.19	elmmo
rno-miR-23b-3p	MIMAT0000793	Cnot7	306492	ENSRNOG00000012263	NA	NA	predicted	0.19	elmmo
rno-miR-23b-3p	MIMAT0000793	Rnf24	362218	ENSRNOG00000021250	NA	NA	predicted	0.19	elmmo
rno-miR-23b-3p	MIMAT0000793	Tpd52l2	296480	ENSRNOG00000015122	NA	NA	predicted	0.19	elmmo
rno-miR-23b-3p	MIMAT0000793	Pcbp3	294336	ENSRNOG00000001245	NA	NA	predicted	0.19	elmmo
rno-miR-23b-3p	MIMAT0000793	Mtpn	79215	ENSRNOG00000011857	NA	NA	predicted	0.19	elmmo
rno-miR-23b-3p	MIMAT0000793	Tmem30b	314224	ENSRNOG00000008046	NA	NA	predicted	0.19	elmmo
rno-miR-23b-3p	MIMAT0000793	Tmem27	57395	ENSRNOG00000003960	NA	NA	predicted	0.19	elmmo
rno-miR-23b-3p	MIMAT0000793	Tmem220	287405	ENSRNOG00000003367	NA	NA	predicted	0.19	elmmo
rno-miR-23b-3p	MIMAT0000793	Rbm34	307956	ENSRNOG00000020004	NA	NA	predicted	0.19	elmmo
rno-miR-23b-3p	MIMAT0000793	Ptprc	24699	ENSRNOG00000000655	NA	NA	predicted	0.19	elmmo
rno-miR-23b-3p	MIMAT0000793	Erlin2	290823	ENSRNOG00000013763	NA	NA	predicted	0.19	elmmo
rno-miR-23b-3p	MIMAT0000793	Adamts12	294809	ENSRNOG00000018865	NA	NA	predicted	0.19	elmmo
rno-miR-23b-3p	MIMAT0000793	Rpap2	305120	ENSRNOG00000023484	NA	NA	predicted	0.19	elmmo
rno-miR-23b-3p	MIMAT0000793	Utp18	303456	ENSRNOG00000002644	NA	NA	predicted	0.19	elmmo
rno-miR-23b-3p	MIMAT0000793	Shcbp1l	289101	ENSRNOG00000002691	NA	NA	predicted	0.19	elmmo
rno-miR-23b-3p	MIMAT0000793	Camsap1	296580	ENSRNOG00000017883	NA	NA	predicted	0.19	elmmo
rno-miR-23b-3p	MIMAT0000793	Vip	117064	ENSRNOG00000018808	NA	NA	predicted	0.19	elmmo
rno-miR-23b-3p	MIMAT0000793	Nfasc	116690	ENSRNOG00000030515	NA	NA	predicted	0.19	elmmo
rno-miR-23b-3p	MIMAT0000793	Piwil2	306011	ENSRNOG00000009871	NA	NA	predicted	0.19	elmmo
rno-miR-23b-3p	MIMAT0000793	Ndrg1	299923	ENSRNOG00000007393	NA	NA	predicted	0.19	elmmo
rno-miR-23b-3p	MIMAT0000793	Sult1a1	83783	ENSRNOG00000019342	NA	NA	predicted	0.19	elmmo
rno-miR-23b-3p	MIMAT0000793	Tmem47	501569	ENSRNOG00000030418	NA	NA	predicted	0.19	elmmo
rno-miR-23b-3p	MIMAT0000793	Galnt2	292090	ENSRNOG00000019143	NA	NA	predicted	0.189	elmmo
rno-miR-23b-3p	MIMAT0000793	Tor2a	362112	ENSRNOG00000022514	NA	NA	predicted	0.188	elmmo
rno-miR-23b-3p	MIMAT0000793	Rasl10a	364190	ENSRNOG00000008951	NA	NA	predicted	0.188	elmmo
rno-miR-23b-3p	MIMAT0000793	Dtwd1	296119	ENSRNOG00000009593	NA	NA	predicted	0.188	elmmo
rno-miR-23b-3p	MIMAT0000793	RGD1560065	499724	ENSRNOG00000014857	NA	NA	predicted	0.188	elmmo
rno-miR-23b-3p	MIMAT0000793	Adhfe1	362474	ENSRNOG00000007069	NA	NA	predicted	0.188	elmmo
rno-miR-23b-3p	MIMAT0000793	Med10	290939	ENSRNOG00000017150	NA	NA	predicted	0.188	elmmo
rno-miR-23b-3p	MIMAT0000793	Epsti1	498547	ENSRNOG00000009471	NA	NA	predicted	0.188	elmmo
rno-miR-23b-3p	MIMAT0000793	Cntnap4		ENSRNOG00000011231	NA	NA	predicted	0.188	elmmo
rno-miR-23b-3p	MIMAT0000793	2004-08-01	298533	ENSRNOG00000025596	NA	NA	predicted	0.188	elmmo
rno-miR-23b-3p	MIMAT0000793	Isca2	500694	ENSRNOG00000012085	NA	NA	predicted	0.188	elmmo
rno-miR-23b-3p	MIMAT0000793	Ppp1r1c	499818	ENSRNOG00000024990	NA	NA	predicted	0.188	elmmo
rno-miR-23b-3p	MIMAT0000793	Dnajc5g	366567	ENSRNOG00000026578	NA	NA	predicted	0.188	elmmo
rno-miR-23b-3p	MIMAT0000793	Trat1	498075	ENSRNOG00000029564	NA	NA	predicted	0.188	elmmo
rno-miR-23b-3p	MIMAT0000793	Col10a1	25681	ENSRNOG00000051399	NA	NA	predicted	0.188	elmmo
rno-miR-23b-3p	MIMAT0000793	Mrc1	291327	ENSRNOG00000018251	NA	NA	predicted	0.179	elmmo
rno-miR-23b-3p	MIMAT0000793	Ikzf5	309031	ENSRNOG00000025651	NA	NA	predicted	0.179	elmmo
rno-miR-23b-3p	MIMAT0000793	Rfc1	89809	ENSRNOG00000002855	NA	NA	predicted	0.179	elmmo
rno-miR-23b-3p	MIMAT0000793	Ralb	116546	ENSRNOG00000002440	NA	NA	predicted	0.179	elmmo
rno-miR-23b-3p	MIMAT0000793	Syt4	64440	ENSRNOG00000017333	NA	NA	predicted	0.179	elmmo
rno-miR-23b-3p	MIMAT0000793	Pde9a	191569	ENSRNOG00000001174	NA	NA	predicted	0.179	elmmo
rno-miR-23b-3p	MIMAT0000793	Cpsf7	365407	ENSRNOG00000020668	NA	NA	predicted	0.179	elmmo
rno-miR-23b-3p	MIMAT0000793	Zfp39	303173	ENSRNOG00000014712	NA	NA	predicted	0.177	elmmo
rno-miR-23b-3p	MIMAT0000793	Ugt1a1	396551	ENSRNOG00000018740	NA	NA	predicted	0.176	elmmo
rno-miR-23b-3p	MIMAT0000793	Pabpc5	688518	ENSRNOG00000003354	NA	NA	predicted	0.176	elmmo
rno-miR-23b-3p	MIMAT0000793	Kctd17	300317	ENSRNOG00000000231	NA	NA	predicted	0.176	elmmo
rno-miR-23b-3p	MIMAT0000793	LOC100362344	100362344	ENSRNOG00000036910	NA	NA	predicted	0.176	elmmo
rno-miR-23b-3p	MIMAT0000793	Pdxp	727679	ENSRNOG00000009570	NA	NA	predicted	0.176	elmmo
rno-miR-23b-3p	MIMAT0000793	Pla2g4e	296091	ENSRNOG00000024904	NA	NA	predicted	0.176	elmmo
rno-miR-23b-3p	MIMAT0000793	Klf11	313994	ENSRNOG00000054259	NA	NA	predicted	0.176	elmmo
rno-miR-23b-3p	MIMAT0000793	Zfp445	301076	ENSRNOG00000025554	NA	NA	predicted	0.176	elmmo
rno-miR-23b-3p	MIMAT0000793	Elk4	304786	ENSRNOG00000007887	NA	NA	predicted	0.176	elmmo
rno-miR-23b-3p	MIMAT0000793	Sfrp5	309377	ENSRNOG00000014940	NA	NA	predicted	0.176	elmmo
rno-miR-23b-3p	MIMAT0000793	Grtp1	290880	ENSRNOG00000019504	NA	NA	predicted	0.176	elmmo
rno-miR-23b-3p	MIMAT0000793	Adam15	57025	ENSRNOG00000020590	NA	NA	predicted	0.176	elmmo
rno-miR-23b-3p	MIMAT0000793	Dab2	79128	ENSRNOG00000028930	NA	NA	predicted	0.176	elmmo
rno-miR-23b-3p	MIMAT0000793	Dpp8	315758	ENSRNOG00000019105	NA	NA	predicted	0.176	elmmo
rno-miR-23b-3p	MIMAT0000793	Syn2	29179	ENSRNOG00000008157	NA	NA	predicted	0.176	elmmo
rno-miR-23b-3p	MIMAT0000793	Clasp2	114514	ENSRNOG00000009161	NA	NA	predicted	0.176	elmmo
rno-miR-23b-3p	MIMAT0000793	Pcyox1	246302	ENSRNOG00000016704	NA	NA	predicted	0.176	elmmo
rno-miR-23b-3p	MIMAT0000793	Vwa3a	293449	ENSRNOG00000025110	NA	NA	predicted	0.176	elmmo
rno-miR-23b-3p	MIMAT0000793	Tstd3	500420	ENSRNOG00000028185	NA	NA	predicted	0.176	elmmo
rno-miR-23b-3p	MIMAT0000793	Celf5	314647	ENSRNOG00000004695	NA	NA	predicted	0.176	elmmo
rno-miR-23b-3p	MIMAT0000793	Higd2a	290999	ENSRNOG00000017372	NA	NA	predicted	0.176	elmmo
rno-miR-23b-3p	MIMAT0000793	Fry	304244	ENSRNOG00000000894	NA	NA	predicted	0.176	elmmo
rno-miR-23b-3p	MIMAT0000793	Akap11	498549	ENSRNOG00000009987	NA	NA	predicted	0.176	elmmo
rno-miR-23b-3p	MIMAT0000793	Nfkbiz	304005	ENSRNOG00000031163	NA	NA	predicted	0.176	elmmo
rno-miR-23b-3p	MIMAT0000793	Chp1	500462	ENSRNOG00000004742	NA	NA	predicted	0.176	elmmo
rno-miR-23b-3p	MIMAT0000793	Tm6sf1	361600	ENSRNOG00000019662	NA	NA	predicted	0.176	elmmo
rno-miR-23b-3p	MIMAT0000793	Acsl4	113976	ENSRNOG00000019180	NA	NA	predicted	0.176	elmmo
rno-miR-23b-3p	MIMAT0000793	Ugt1a5	113992	ENSRNOG00000018740	NA	NA	predicted	0.176	elmmo
rno-miR-23b-3p	MIMAT0000793	Fam110d	500563	ENSRNOG00000016491	NA	NA	predicted	0.176	elmmo
rno-miR-23b-3p	MIMAT0000793	Zfp867	100125361	ENSRNOG00000022431	NA	NA	predicted	0.176	elmmo
rno-miR-23b-3p	MIMAT0000793	Shroom2	317435	ENSRNOG00000024322	NA	NA	predicted	0.176	elmmo
rno-miR-23b-3p	MIMAT0000793	Rarg	685072	ENSRNOG00000012499	NA	NA	predicted	0.176	elmmo
rno-miR-23b-3p	MIMAT0000793	Ubxn8	290802	ENSRNOG00000015109	NA	NA	predicted	0.176	elmmo
rno-miR-23b-3p	MIMAT0000793	Tmem87a	366170	ENSRNOG00000008455	NA	NA	predicted	0.176	elmmo
rno-miR-23b-3p	MIMAT0000793	Psma3	29670	ENSRNOG00000007851	NA	NA	predicted	0.176	elmmo
rno-miR-23b-3p	MIMAT0000793	LOC100365676	300783	ENSRNOG00000030232	NA	NA	predicted	0.176	elmmo
rno-miR-23b-3p	MIMAT0000793	Adm	25026	ENSRNOG00000027030	NA	NA	predicted	0.176	elmmo
rno-miR-23b-3p	MIMAT0000793	Iqcb1	303915	ENSRNOG00000038868	NA	NA	predicted	0.176	elmmo
rno-miR-23b-3p	MIMAT0000793	Bin2a	494244	ENSRNOG00000032461	NA	NA	predicted	0.176	elmmo
rno-miR-23b-3p	MIMAT0000793	Phlda3	363989	ENSRNOG00000009068	NA	NA	predicted	0.176	elmmo
rno-miR-23b-3p	MIMAT0000793	March8	312656	ENSRNOG00000012297	NA	NA	predicted	0.176	elmmo
rno-miR-23b-3p	MIMAT0000793	Nxt2	315352	ENSRNOG00000019168	NA	NA	predicted	0.176	elmmo
rno-miR-23b-3p	MIMAT0000793	MGC109340	100360464	ENSRNOG00000046858	NA	NA	predicted	0.176	elmmo
rno-miR-23b-3p	MIMAT0000793	Abce1	361390	ENSRNOG00000018345	NA	NA	predicted	0.176	elmmo
rno-miR-23b-3p	MIMAT0000793	Ugt1a8	24861	ENSRNOG00000018740	NA	NA	predicted	0.176	elmmo
rno-miR-23b-3p	MIMAT0000793	Gale	114860	ENSRNOG00000009712	NA	NA	predicted	0.176	elmmo
rno-miR-23b-3p	MIMAT0000793	Slc12a6	691209	ENSRNOG00000005196	NA	NA	predicted	0.176	elmmo
rno-miR-23b-3p	MIMAT0000793	LOC498265	498265	ENSRNOG00000059276	NA	NA	predicted	0.176	elmmo
rno-miR-23b-3p	MIMAT0000793	Ppapdc1a	309014	ENSRNOG00000020424	NA	NA	predicted	0.176	elmmo
rno-miR-23b-3p	MIMAT0000793	Syt2	24805	ENSRNOG00000004756	NA	NA	predicted	0.176	elmmo
rno-miR-23b-3p	MIMAT0000793	Enoph1	305177	ENSRNOG00000002262	NA	NA	predicted	0.176	elmmo
rno-miR-23b-3p	MIMAT0000793	Dact2	308212	ENSRNOG00000022921	NA	NA	predicted	0.176	elmmo
rno-miR-23b-3p	MIMAT0000793	MGC114246	498688	ENSRNOG00000039990	NA	NA	predicted	0.176	elmmo
rno-miR-23b-3p	MIMAT0000793	Fut9	84597	ENSRNOG00000008475	NA	NA	predicted	0.176	elmmo
rno-miR-23b-3p	MIMAT0000793	Ugt1a3	24861	ENSRNOG00000018740	NA	NA	predicted	0.176	elmmo
rno-miR-23b-3p	MIMAT0000793	RGD1559896	498967	ENSRNOG00000018836	NA	NA	predicted	0.176	elmmo
rno-miR-23b-3p	MIMAT0000793	Cox11		ENSRNOG00000002458	NA	NA	predicted	0.176	elmmo
rno-miR-23b-3p	MIMAT0000793	Atcay	362826	ENSRNOG00000020407	NA	NA	predicted	0.176	elmmo
rno-miR-23b-3p	MIMAT0000793	Serf1	502503	ENSRNOG00000017945	NA	NA	predicted	0.176	elmmo
rno-miR-23b-3p	MIMAT0000793	Zfp40	690661	ENSRNOG00000011675	NA	NA	predicted	0.176	elmmo
rno-miR-23b-3p	MIMAT0000793	Kcnv2	294065	ENSRNOG00000012566	NA	NA	predicted	0.176	elmmo
rno-miR-23b-3p	MIMAT0000793	Ccdc67	315438	ENSRNOG00000061247	NA	NA	predicted	0.176	elmmo
rno-miR-23b-3p	MIMAT0000793	Tmed5	289883	ENSRNOG00000000073	NA	NA	predicted	0.176	elmmo
rno-miR-23b-3p	MIMAT0000793	Xkr8	313033	ENSRNOG00000024312	NA	NA	predicted	0.176	elmmo
rno-miR-23b-3p	MIMAT0000793	Mllt11	295264	ENSRNOG00000021110	NA	NA	predicted	0.176	elmmo
rno-miR-23b-3p	MIMAT0000793	Smc2	362519	ENSRNOG00000022325	NA	NA	predicted	0.176	elmmo
rno-miR-23b-3p	MIMAT0000793	Ugt1a9	24861	ENSRNOG00000018740	NA	NA	predicted	0.176	elmmo
rno-miR-23b-3p	MIMAT0000793	Hus1	498411	ENSRNOG00000005141	NA	NA	predicted	0.176	elmmo
rno-miR-23b-3p	MIMAT0000793	Nav2	171563	ENSRNOG00000014530	NA	NA	predicted	0.176	elmmo
rno-miR-23b-3p	MIMAT0000793	Ugt1a7c	100912040	ENSRNOG00000018740	NA	NA	predicted	0.176	elmmo
rno-miR-23b-3p	MIMAT0000793	Lpcat1	361467	ENSRNOG00000017930	NA	NA	predicted	0.176	elmmo
rno-miR-23b-3p	MIMAT0000793	Cwf19l2	362804	ENSRNOG00000024372	NA	NA	predicted	0.176	elmmo
rno-miR-23b-3p	MIMAT0000793	Acsm2a	246263	ENSRNOG00000042084	NA	NA	predicted	0.176	elmmo
rno-miR-23b-3p	MIMAT0000793	LOC100910063	310815	ENSRNOG00000017077	NA	NA	predicted	0.176	elmmo
rno-miR-23b-3p	MIMAT0000793	RGD1561897	498754	ENSRNOG00000002941	NA	NA	predicted	0.176	elmmo
rno-miR-23b-3p	MIMAT0000793	Plekhh1	314262	ENSRNOG00000010650	NA	NA	predicted	0.176	elmmo
rno-miR-23b-3p	MIMAT0000793	Ptgr2	299194	ENSRNOG00000038166	NA	NA	predicted	0.176	elmmo
rno-miR-23b-3p	MIMAT0000793	Nprl2	363138	ENSRNOG00000021660	NA	NA	predicted	0.176	elmmo
rno-miR-23b-3p	MIMAT0000793	Acsl3	114024	ENSRNOG00000014718	NA	NA	predicted	0.176	elmmo
rno-miR-23b-3p	MIMAT0000793	Ugt1a2	100912040	ENSRNOG00000018740	NA	NA	predicted	0.176	elmmo
rno-miR-23b-3p	MIMAT0000793	Lgi4	361549	ENSRNOG00000021087	NA	NA	predicted	0.176	elmmo
rno-miR-23b-3p	MIMAT0000793	Cdc45	287961	ENSRNOG00000050071	NA	NA	predicted	0.176	elmmo
rno-miR-23b-3p	MIMAT0000793	Grhl3	298555	ENSRNOG00000029427	NA	NA	predicted	0.176	elmmo
rno-miR-23b-3p	MIMAT0000793	RGD1565692	501653	ENSRNOG00000039576	NA	NA	predicted	0.176	elmmo
rno-miR-23b-3p	MIMAT0000793	Ppp1r3c	309513	ENSRNOG00000018494	NA	NA	predicted	0.176	elmmo
rno-miR-23b-3p	MIMAT0000793	Uhmk1	246332	ENSRNOG00000002941	NA	NA	predicted	0.176	elmmo
rno-miR-23b-3p	MIMAT0000793	Scoc	364981	ENSRNOG00000003853	NA	NA	predicted	0.176	elmmo
rno-miR-23b-3p	MIMAT0000793	Adora2a	25369	ENSRNOG00000001302	NA	NA	predicted	0.176	elmmo
rno-miR-23b-3p	MIMAT0000793	Slc39a13	295928	ENSRNOG00000011981	NA	NA	predicted	0.176	elmmo
rno-miR-23b-3p	MIMAT0000793	Cdh17	117048	ENSRNOG00000015562	NA	NA	predicted	0.176	elmmo
rno-miR-23b-3p	MIMAT0000793	Ntsr1	366274	ENSRNOG00000028708	NA	NA	predicted	0.176	elmmo
rno-miR-23b-3p	MIMAT0000793	Ugt1a6	100912000	ENSRNOG00000018740	NA	NA	predicted	0.176	elmmo
rno-miR-23b-3p	MIMAT0000793	Agk	502749	ENSRNOG00000011509	NA	NA	predicted	0.176	elmmo
rno-miR-23b-3p	MIMAT0000793	Eif2s3	100312984	ENSRNOG00000006186	NA	NA	predicted	0.176	elmmo
rno-miR-23b-3p	MIMAT0000793	Fam102b	365903	ENSRNOG00000027540	NA	NA	predicted	0.176	elmmo
rno-miR-23b-3p	MIMAT0000793	RGD1307830	304863	ENSRNOG00000002473	NA	NA	predicted	0.176	elmmo
rno-miR-23b-3p	MIMAT0000793	Suv39h1	302553	ENSRNOG00000039576	NA	NA	predicted	0.176	elmmo
rno-miR-23b-3p	MIMAT0000793	Tcerg1	307474	ENSRNOG00000018849	NA	NA	predicted	0.176	elmmo
rno-miR-23b-3p	MIMAT0000793	Zfp367	306695	ENSRNOG00000027234	NA	NA	predicted	0.176	elmmo
rno-miR-23b-3p	MIMAT0000793	Cdc14a	310806	ENSRNOG00000014515	NA	NA	predicted	0.176	elmmo
rno-miR-23b-3p	MIMAT0000793	Laptm4b	315047	ENSRNOG00000006766	NA	NA	predicted	0.176	elmmo
rno-miR-23b-3p	MIMAT0000793	RGD1563072	313595	ENSRNOG00000021609	NA	NA	predicted	0.176	elmmo
rno-miR-23b-3p	MIMAT0000793	RGD1311343	360506	ENSRNOG00000027852	NA	NA	predicted	0.176	elmmo
rno-miR-23b-3p	MIMAT0000793	Vopp1	362374	ENSRNOG00000006646	NA	NA	predicted	0.176	elmmo
rno-miR-23b-3p	MIMAT0000793	Atp5b	171374	ENSRNOG00000002840	NA	NA	predicted	0.176	elmmo
rno-miR-23b-3p	MIMAT0000793	Adi1	298934	ENSRNOG00000008950	NA	NA	predicted	0.176	elmmo
rno-miR-23b-3p	MIMAT0000793	Olig3	293012	ENSRNOG00000012057	NA	NA	predicted	0.176	elmmo
rno-miR-23b-3p	MIMAT0000793	Slc35b4	296969	ENSRNOG00000008851	NA	NA	predicted	0.176	elmmo
rno-miR-23b-3p	MIMAT0000793	Gna14	309242	ENSRNOG00000014840	NA	NA	predicted	0.176	elmmo
rno-miR-23b-3p	MIMAT0000793	Zfyve9	313477	ENSRNOG00000027183	NA	NA	predicted	0.176	elmmo
rno-miR-23b-3p	MIMAT0000793	Klhl4	317196	ENSRNOG00000005215	NA	NA	predicted	0.176	elmmo
rno-miR-23b-3p	MIMAT0000793	Sdcbp	83841	ENSRNOG00000009683	NA	NA	predicted	0.176	elmmo
rno-miR-23b-3p	MIMAT0000793	Trim59	365813	ENSRNOG00000010515	NA	NA	predicted	0.176	elmmo
rno-miR-23b-3p	MIMAT0000793	Cep76	291540	ENSRNOG00000021918	NA	NA	predicted	0.176	elmmo
rno-miR-23b-3p	MIMAT0000793	Zfp563	314584	ENSRNOG00000030273	NA	NA	predicted	0.176	elmmo
rno-miR-23b-3p	MIMAT0000793	Cdyl2	292044	ENSRNOG00000042888	NA	NA	predicted	0.176	elmmo
rno-miR-23b-3p	MIMAT0000793	Plagl2	296281	ENSRNOG00000010086	NA	NA	predicted	0.176	elmmo
rno-miR-23b-3p	MIMAT0000793	MGC95208	100361713	ENSRNOG00000000720	NA	NA	predicted	0.176	elmmo
rno-miR-23b-3p	MIMAT0000793	Pnma2	305977	ENSRNOG00000009815	NA	NA	predicted	0.176	elmmo
rno-miR-23b-3p	MIMAT0000793	Gcc2	309798	ENSRNOG00000000823	NA	NA	predicted	0.176	elmmo
rno-miR-23b-3p	MIMAT0000793	LOC100910868	100910868	ENSRNOG00000015799	NA	NA	predicted	0.176	elmmo
rno-miR-23b-3p	MIMAT0000793	Grid2	79220	ENSRNOG00000006174	NA	NA	predicted	0.176	elmmo
rno-miR-23b-3p	MIMAT0000793	Ndufs4	499529	ENSRNOG00000011383	NA	NA	predicted	0.176	elmmo
rno-miR-23b-3p	MIMAT0000793	Scd	83792	ENSRNOG00000046005	NA	NA	predicted	0.176	elmmo
rno-miR-23b-3p	MIMAT0000793	Tmem229b	503035	ENSRNOG00000010646	NA	NA	predicted	0.176	elmmo
rno-miR-23b-3p	MIMAT0000793	Ppip5k1	311355	ENSRNOG00000014436	NA	NA	predicted	0.176	elmmo
rno-miR-23b-3p	MIMAT0000793	Slc45a3	304785	ENSRNOG00000007591	NA	NA	predicted	0.176	elmmo
rno-miR-23b-3p	MIMAT0000793	Afap1l1	291565	ENSRNOG00000019403	NA	NA	predicted	0.176	elmmo
rno-miR-23b-3p	MIMAT0000793	Tmem91	100359879	ENSRNOG00000021302	NA	NA	predicted	0.176	elmmo
rno-miR-23b-3p	MIMAT0000793	Prrg1	363472	ENSRNOG00000026044	NA	NA	predicted	0.176	elmmo
rno-miR-23b-3p	MIMAT0000793	Git1	83709	ENSRNOG00000061270	NA	NA	predicted	0.176	elmmo
rno-miR-23b-3p	MIMAT0000793	Dclk1	83825	ENSRNOG00000032922	NA	NA	predicted	0.176	elmmo
rno-miR-23b-3p	MIMAT0000793	Sox17	312936	ENSRNOG00000027357	NA	NA	predicted	0.176	elmmo
rno-miR-23b-3p	MIMAT0000793	Apool	317191	ENSRNOG00000004512	NA	NA	predicted	0.176	elmmo
rno-miR-23b-3p	MIMAT0000793	Wasf1	294568	ENSRNOG00000047476	NA	NA	predicted	0.176	elmmo
rno-miR-23b-3p	MIMAT0000793	Sfxn4	361778	ENSRNOG00000036572	NA	NA	predicted	0.176	elmmo
rno-miR-23b-3p	MIMAT0000793	Suv39h2	364785	ENSRNOG00000015585	NA	NA	predicted	0.176	elmmo
rno-miR-23b-3p	MIMAT0000793	Atp12a	171028	ENSRNOG00000020685	NA	NA	predicted	0.176	elmmo
rno-miR-23b-3p	MIMAT0000793	Vwc2	501231	ENSRNOG00000049076	NA	NA	predicted	0.176	elmmo
rno-miR-23b-3p	MIMAT0000793	Slc25a25	246771	ENSRNOG00000014338	NA	NA	predicted	0.176	elmmo
rno-miR-23b-3p	MIMAT0000793	Tbck	295446	ENSRNOG00000011454	NA	NA	predicted	0.176	elmmo
rno-miR-23b-3p	MIMAT0000793	Rbx1	300084	ENSRNOG00000058914	NA	NA	predicted	0.176	elmmo
rno-miR-23b-3p	MIMAT0000793	Sdc1	25216	ENSRNOG00000059947	NA	NA	predicted	0.176	elmmo
rno-miR-23b-3p	MIMAT0000793	P2ry1	25265	ENSRNOG00000014232	NA	NA	predicted	0.176	elmmo
rno-miR-23b-3p	MIMAT0000793	Tmem126a	293113	ENSRNOG00000022748	NA	NA	predicted	0.176	elmmo
rno-miR-23b-3p	MIMAT0000793	Srgn	56782	ENSRNOG00000000394	NA	NA	predicted	0.176	elmmo
rno-miR-23b-3p	MIMAT0000793	Arf2	79119	ENSRNOG00000004807	NA	NA	predicted	0.176	elmmo
rno-miR-23b-3p	MIMAT0000793	Hmg20a	315689	ENSRNOG00000016905	NA	NA	predicted	0.176	elmmo
rno-miR-23b-3p	MIMAT0000793	Ppig	83624	ENSRNOG00000007673	NA	NA	predicted	0.176	elmmo
rno-miR-23b-3p	MIMAT0000793	Slfn3	114247	ENSRNOG00000048673	NA	NA	predicted	0.176	elmmo
rno-miR-23b-3p	MIMAT0000793	Piga	363464	ENSRNOG00000003554	NA	NA	predicted	0.176	elmmo
rno-miR-23b-3p	MIMAT0000793	Sdha	157074	ENSRNOG00000013331	NA	NA	predicted	0.176	elmmo
rno-miR-23b-3p	MIMAT0000793	Kirrel3	315546	ENSRNOG00000009772	NA	NA	predicted	0.176	elmmo
rno-miR-23b-3p	MIMAT0000793	Mtus1	306487	ENSRNOG00000010748	NA	NA	predicted	0.176	elmmo
rno-miR-23b-3p	MIMAT0000793	Agfg1	363266	ENSRNOG00000015619	NA	NA	predicted	0.176	elmmo
rno-miR-23b-3p	MIMAT0000793	Eif2s3y	100312984	ENSRNOG00000060048	NA	NA	predicted	0.176	elmmo
rno-miR-23b-3p	MIMAT0000793	Tceal1	302593	ENSRNOG00000002387	NA	NA	predicted	0.176	elmmo
rno-miR-23b-3p	MIMAT0000793	Slc10a1	24777	ENSRNOG00000005794	NA	NA	predicted	0.176	elmmo
rno-miR-23b-3p	MIMAT0000793	Arih2	316005	ENSRNOG00000031827	NA	NA	predicted	0.176	elmmo
rno-miR-23b-3p	MIMAT0000793	Iqgap1	361598	ENSRNOG00000012002	NA	NA	predicted	0.176	elmmo
rno-miR-23b-3p	MIMAT0000793	Fancd2os	500294	ENSRNOG00000010177	NA	NA	predicted	0.176	elmmo
rno-miR-23b-3p	MIMAT0000793	Lmbrd1	246046	ENSRNOG00000012178	NA	NA	predicted	0.176	elmmo
rno-miR-23b-3p	MIMAT0000793	Tollip	361677	ENSRNOG00000019861	NA	NA	predicted	0.176	elmmo
rno-miR-23b-3p	MIMAT0000793	Hsp90aa1	100362895	ENSRNOG00000007219	NA	NA	predicted	0.176	elmmo
rno-miR-23b-3p	MIMAT0000793	Nkx2-4	366213	ENSRNOG00000012647	NA	NA	predicted	0.176	elmmo
rno-miR-23b-3p	MIMAT0000793	Ube2k	289623	ENSRNOG00000027088	NA	NA	predicted	0.176	elmmo
rno-miR-23b-3p	MIMAT0000793	Engase	303702	ENSRNOG00000027498	NA	NA	predicted	0.176	elmmo
rno-miR-23b-3p	MIMAT0000793	Il9r	24500	ENSRNOG00000020630	NA	NA	predicted	0.176	elmmo
rno-miR-23b-3p	MIMAT0000793	Herc2	308669	ENSRNOG00000013718	NA	NA	predicted	0.176	elmmo
rno-miR-23b-3p	MIMAT0000793	Homer1	29546	ENSRNOG00000047014	NA	NA	predicted	0.176	elmmo
rno-miR-23b-3p	MIMAT0000793	Pfkfb2	24640	ENSRNOG00000004162	NA	NA	predicted	0.176	elmmo
rno-miR-23b-3p	MIMAT0000793	Rassf3	362886	ENSRNOG00000005388	NA	NA	predicted	0.176	elmmo
rno-miR-23b-3p	MIMAT0000793	Ccdc126	500117	ENSRNOG00000009322	NA	NA	predicted	0.176	elmmo
rno-miR-23b-3p	MIMAT0000793	Nedd8	25490	ENSRNOG00000019895	NA	NA	predicted	0.176	elmmo
rno-miR-23b-3p	MIMAT0000793	Med30	299905	ENSRNOG00000004844	NA	NA	predicted	0.176	elmmo
rno-miR-23b-3p	MIMAT0000793	Map3k15	501558	ENSRNOG00000025290	NA	NA	predicted	0.176	elmmo
rno-miR-23b-3p	MIMAT0000793	Angel2	305035	ENSRNOG00000003795	NA	NA	predicted	0.176	elmmo
rno-miR-23b-3p	MIMAT0000793	Nhlh1	289230	ENSRNOG00000005166	NA	NA	predicted	0.176	elmmo
rno-miR-23b-3p	MIMAT0000793	Gria4	29629	ENSRNOG00000006957	NA	NA	predicted	0.176	elmmo
rno-miR-23b-3p	MIMAT0000793	Kcnj6	25743	ENSRNOG00000001658	NA	NA	predicted	0.176	elmmo
rno-miR-23b-3p	MIMAT0000793	Mllt10	361285	ENSRNOG00000022249	NA	NA	predicted	0.176	elmmo
rno-miR-23b-3p	MIMAT0000793	Pik3ip1	305472	ENSRNOG00000018859	NA	NA	predicted	0.176	elmmo
rno-miR-23b-3p	MIMAT0000793	Pxmp2	29533	ENSRNOG00000037446	NA	NA	predicted	0.176	elmmo
rno-miR-23b-3p	MIMAT0000793	Olr59	170816	ENSRNOG00000018606	NA	NA	predicted	0.176	elmmo
rno-miR-23b-3p	MIMAT0000793	Fam171b	499821	ENSRNOG00000004783	NA	NA	predicted	0.176	elmmo
rno-miR-23b-3p	MIMAT0000793	Irs2	29376	ENSRNOG00000023509	NA	NA	predicted	0.176	elmmo
rno-miR-23b-3p	MIMAT0000793	Fam221a	500118	ENSRNOG00000009447	NA	NA	predicted	0.176	elmmo
rno-miR-23b-3p	MIMAT0000793	Tstd2	362514	ENSRNOG00000009724	NA	NA	predicted	0.176	elmmo
rno-miR-23b-3p	MIMAT0000793	Lefty2	498299	ENSRNOG00000003263	NA	NA	predicted	0.176	elmmo
rno-miR-23b-3p	MIMAT0000793	Pcdhb12	25133	ENSRNOG00000033719	NA	NA	predicted	0.176	elmmo
rno-miR-23b-3p	MIMAT0000793	Ap3d1	314633	ENSRNOG00000018977	NA	NA	predicted	0.176	elmmo
rno-miR-23b-3p	MIMAT0000793	Eapp	299043	ENSRNOG00000004509	NA	NA	predicted	0.176	elmmo
rno-miR-23b-3p	MIMAT0000793	RGD1564899	102556889	ENSRNOG00000049942	NA	NA	predicted	0.176	elmmo
rno-miR-23b-3p	MIMAT0000793	Sntg2	298936	ENSRNOG00000004928	NA	NA	predicted	0.176	elmmo
rno-miR-23b-3p	MIMAT0000793	Pamr1	311252	ENSRNOG00000005348	NA	NA	predicted	0.176	elmmo
rno-miR-23b-3p	MIMAT0000793	Pla2g2d	298579	ENSRNOG00000016826	NA	NA	predicted	0.176	elmmo
rno-miR-23b-3p	MIMAT0000793	Scarb2	117106	ENSRNOG00000002225	NA	NA	predicted	0.176	elmmo
rno-miR-23b-3p	MIMAT0000793	Ccdc69	497906	ENSRNOG00000021370	NA	NA	predicted	0.176	elmmo
rno-miR-23b-3p	MIMAT0000793	Slc30a4	64469	ENSRNOG00000000170	NA	NA	predicted	0.176	elmmo
rno-miR-23b-3p	MIMAT0000793	Stt3a	500972	ENSRNOG00000031896	NA	NA	predicted	0.176	elmmo
rno-miR-23b-3p	MIMAT0000793	Dgcr8	287954	ENSRNOG00000001886	NA	NA	predicted	0.176	elmmo
rno-miR-23b-3p	MIMAT0000793	Txndc16	361025	ENSRNOG00000006334	NA	NA	predicted	0.176	elmmo
rno-miR-23b-3p	MIMAT0000793	Nr3c1		ENSRNOG00000014096	NA	NA	predicted	0.176	elmmo
rno-miR-23b-3p	MIMAT0000793	Prss35	315866	ENSRNOG00000025184	NA	NA	predicted	0.176	elmmo
rno-miR-23b-3p	MIMAT0000793	Mib1	307594	ENSRNOG00000013281	NA	NA	predicted	0.176	elmmo
rno-miR-23b-3p	MIMAT0000793	Rap1gds1	310909	ENSRNOG00000015987	NA	NA	predicted	0.176	elmmo
rno-miR-23b-3p	MIMAT0000793	Dnajb6	690183	ENSRNOG00000010353	NA	NA	predicted	0.176	elmmo
rno-miR-23b-3p	MIMAT0000793	Pdik1l	313609	ENSRNOG00000016536	NA	NA	predicted	0.176	elmmo
rno-miR-23b-3p	MIMAT0000793	Cacul1	365493	ENSRNOG00000009954	NA	NA	predicted	0.176	elmmo
rno-miR-23b-3p	MIMAT0000793	Ifngr2	360697	ENSRNOG00000002032	NA	NA	predicted	0.176	elmmo
rno-miR-23b-3p	MIMAT0000793	Cdr2	308958	ENSRNOG00000017260	NA	NA	predicted	0.176	elmmo
rno-miR-23b-3p	MIMAT0000793	LOC654482	654482	ENSRNOG00000043410	NA	NA	predicted	0.176	elmmo
rno-miR-23b-3p	MIMAT0000793	Lamc1	117036	ENSRNOG00000002680	NA	NA	predicted	0.176	elmmo
rno-miR-23b-3p	MIMAT0000793	Ubxn2a	685859	ENSRNOG00000004950	NA	NA	predicted	0.176	elmmo
rno-miR-23b-3p	MIMAT0000793	Pfas	287420	ENSRNOG00000005193	NA	NA	predicted	0.176	elmmo
rno-miR-23b-3p	MIMAT0000793	RGD1561661	302536	ENSRNOG00000023094	NA	NA	predicted	0.176	elmmo
rno-miR-23b-3p	MIMAT0000793	Derl1	501445	ENSRNOG00000005551	NA	NA	predicted	0.176	elmmo
rno-miR-23b-3p	MIMAT0000793	Ocrl	317576	ENSRNOG00000003875	NA	NA	predicted	0.176	elmmo
rno-miR-23b-3p	MIMAT0000793	Apopt1	299341	ENSRNOG00000011542	NA	NA	predicted	0.176	elmmo
rno-miR-23b-3p	MIMAT0000793	Cntn4	116658	ENSRNOG00000005652	NA	NA	predicted	0.176	elmmo
rno-miR-23b-3p	MIMAT0000793	Zfp263	287076	ENSRNOG00000007678	NA	NA	predicted	0.176	elmmo
rno-miR-23b-3p	MIMAT0000793	Nrde2	314381	ENSRNOG00000004004	NA	NA	predicted	0.176	elmmo
rno-miR-23b-3p	MIMAT0000793	Nek9	299204	ENSRNOG00000058572	NA	NA	predicted	0.176	elmmo
rno-miR-23b-3p	MIMAT0000793	Clmp	286939	ENSRNOG00000053239	NA	NA	predicted	0.176	elmmo
rno-miR-23b-3p	MIMAT0000793	Zap70	301348	ENSRNOG00000016995	NA	NA	predicted	0.176	elmmo
rno-miR-23b-3p	MIMAT0000793	Ecel1	60417	ENSRNOG00000019447	NA	NA	predicted	0.176	elmmo
rno-miR-23b-3p	MIMAT0000793	RGD1564541	313433	ENSRNOG00000012564	NA	NA	predicted	0.176	elmmo
rno-miR-23b-3p	MIMAT0000793	Axin1	79257	ENSRNOG00000020414	NA	NA	predicted	0.176	elmmo
rno-miR-23b-3p	MIMAT0000793	Farp2	316639	ENSRNOG00000018051	NA	NA	predicted	0.176	elmmo
rno-miR-23b-3p	MIMAT0000793	Slc25a21	171151	ENSRNOG00000008931	NA	NA	predicted	0.176	elmmo
rno-miR-23b-3p	MIMAT0000793	Gpatch2l	314325	ENSRNOG00000010227	NA	NA	predicted	0.176	elmmo
rno-miR-23b-3p	MIMAT0000793	Acss1	296259	ENSRNOG00000007102	NA	NA	predicted	0.176	elmmo
rno-miR-23b-3p	MIMAT0000793	Zfp192	306974	ENSRNOG00000053635	NA	NA	predicted	0.176	elmmo
rno-miR-23b-3p	MIMAT0000793	Wdfy2	305956	ENSRNOG00000010042	NA	NA	predicted	0.176	elmmo
rno-miR-23b-3p	MIMAT0000793	Invs	313228	ENSRNOG00000008632	NA	NA	predicted	0.176	elmmo
rno-miR-23b-3p	MIMAT0000793	Zfp365	499425	ENSRNOG00000000638	NA	NA	predicted	0.176	elmmo
rno-miR-23b-3p	MIMAT0000793	LOC100912469	83792	ENSRNOG00000046005	NA	NA	predicted	0.176	elmmo
rno-miR-23b-3p	MIMAT0000793	Sft2d3	364835	ENSRNOG00000016216	NA	NA	predicted	0.176	elmmo
rno-miR-23b-3p	MIMAT0000793	RGD1565785	501570	ENSRNOG00000003748	NA	NA	predicted	0.176	elmmo
rno-miR-23b-3p	MIMAT0000793	Isca1	290985	ENSRNOG00000018343	NA	NA	predicted	0.176	elmmo
rno-miR-23b-3p	MIMAT0000793	Tbc1d9	304645	ENSRNOG00000003496	NA	NA	predicted	0.176	elmmo
rno-miR-23b-3p	MIMAT0000793	Wnt3	24882	ENSRNOG00000003845	NA	NA	predicted	0.176	elmmo
rno-miR-23b-3p	MIMAT0000793	Slc39a12	291328	ENSRNOG00000025639	NA	NA	predicted	0.176	elmmo
rno-miR-23b-3p	MIMAT0000793	Dkk2	295445	ENSRNOG00000011360	NA	NA	predicted	0.176	elmmo
rno-miR-23b-3p	MIMAT0000793	Igfbp4	360622	ENSRNOG00000010635	NA	NA	predicted	0.176	elmmo
rno-miR-23b-3p	MIMAT0000793	Ube3a	361585	ENSRNOG00000015734	NA	NA	predicted	0.176	elmmo
rno-miR-23b-3p	MIMAT0000793	Adprhl1	290880	ENSRNOG00000019504	NA	NA	predicted	0.176	elmmo
rno-miR-23b-3p	MIMAT0000793	Larp1b	310348	ENSRNOG00000038366	NA	NA	predicted	0.176	elmmo
rno-miR-23b-3p	MIMAT0000793	Sema4g	361764	ENSRNOG00000014650	NA	NA	predicted	0.176	elmmo
rno-miR-23b-3p	MIMAT0000793	Chmp7	364419	ENSRNOG00000016939	NA	NA	predicted	0.176	elmmo
rno-miR-23b-3p	MIMAT0000793	Nap1l3	170914	ENSRNOG00000029087	NA	NA	predicted	0.176	elmmo
rno-miR-23b-3p	MIMAT0000793	Rab31	246324	ENSRNOG00000042189	NA	NA	predicted	0.176	elmmo
rno-miR-23b-3p	MIMAT0000793	Plcxd2	363781	ENSRNOG00000042289	NA	NA	predicted	0.176	elmmo
rno-miR-23b-3p	MIMAT0000793	Zfp187	266792	ENSRNOG00000033114	NA	NA	predicted	0.176	elmmo
rno-miR-23b-3p	MIMAT0000793	Dcdc2	291130	ENSRNOG00000017511	NA	NA	predicted	0.176	elmmo
rno-miR-23b-3p	MIMAT0000793	Espl1	315330	ENSRNOG00000012835	NA	NA	predicted	0.176	elmmo
rno-miR-23b-3p	MIMAT0000793	Tmem30a	300857	ENSRNOG00000010895	NA	NA	predicted	0.176	elmmo
rno-miR-23b-3p	MIMAT0000793	Prkx	501563	ENSRNOG00000060168	NA	NA	predicted	0.176	elmmo
rno-miR-23b-3p	MIMAT0000793	Hrh3	85268	ENSRNOG00000061153	NA	NA	predicted	0.176	elmmo
rno-miR-23b-3p	MIMAT0000793	Ep400	304569	ENSRNOG00000037483	NA	NA	predicted	0.176	elmmo
rno-miR-23b-3p	MIMAT0000793	Cndp2	291394	ENSRNOG00000015591	NA	NA	predicted	0.176	elmmo
rno-miR-23b-3p	MIMAT0000793	Tpcn2	309139	ENSRNOG00000013387	NA	NA	predicted	0.176	elmmo
rno-miR-23b-3p	MIMAT0000793	Tspyl1	29544	ENSRNOG00000000549	NA	NA	predicted	0.176	elmmo
rno-miR-23b-3p	MIMAT0000793	Cript	56725	ENSRNOG00000015215	NA	NA	predicted	0.176	elmmo
rno-miR-23b-3p	MIMAT0000793	Snx19	315478	ENSRNOG00000014719	NA	NA	predicted	0.176	elmmo
rno-miR-23b-3p	MIMAT0000793	Lrrc14	500900	ENSRNOG00000016128	NA	NA	predicted	0.176	elmmo
rno-miR-23b-3p	MIMAT0000793	Pias3	83614	ENSRNOG00000021218	NA	NA	predicted	0.176	elmmo
rno-miR-23b-3p	MIMAT0000793	Hap1	29430	ENSRNOG00000014819	NA	NA	predicted	0.176	elmmo
rno-miR-23b-3p	MIMAT0000793	Slbp	681062	ENSRNOG00000037162	NA	NA	predicted	0.176	elmmo
rno-miR-23b-3p	MIMAT0000793	Grsf1	305256	ENSRNOG00000003392	NA	NA	predicted	0.176	elmmo
rno-miR-23b-3p	MIMAT0000793	Zmat2	679898	ENSRNOG00000016016	NA	NA	predicted	0.176	elmmo
rno-miR-23b-3p	MIMAT0000793	Csdc2	266600	ENSRNOG00000005332	NA	NA	predicted	0.176	elmmo
rno-miR-23b-3p	MIMAT0000793	Ptplad1	300783	ENSRNOG00000030232	NA	NA	predicted	0.176	elmmo
rno-miR-23b-3p	MIMAT0000793	Cd24	25145	ENSRNOG00000000321	NA	NA	predicted	0.176	elmmo
rno-miR-23b-3p	MIMAT0000793	Fam20c	304334	ENSRNOG00000001314	NA	NA	predicted	0.176	elmmo
rno-miR-23b-3p	MIMAT0000793	Il17ra	312679	ENSRNOG00000011153	NA	NA	predicted	0.176	elmmo
rno-miR-23b-3p	MIMAT0000793	Sumo3	499417	ENSRNOG00000038489	NA	NA	predicted	0.176	elmmo
rno-miR-23b-3p	MIMAT0000793	Apmap	366227	ENSRNOG00000006795	NA	NA	predicted	0.176	elmmo
rno-miR-23b-3p	MIMAT0000793	RGD1560028	500157	ENSRNOG00000006782	NA	NA	predicted	0.176	elmmo
rno-miR-23b-3p	MIMAT0000793	Ppp1r3b	192280	ENSRNOG00000011474	NA	NA	predicted	0.176	elmmo
rno-miR-23b-3p	MIMAT0000793	MGC112715	690899	ENSRNOG00000000569	NA	NA	predicted	0.176	elmmo
rno-miR-23b-3p	MIMAT0000793	Map7d2	317508	ENSRNOG00000005176	NA	NA	predicted	0.176	elmmo
rno-miR-23b-3p	MIMAT0000793	Ankrd17	289521	ENSRNOG00000002940	NA	NA	predicted	0.176	elmmo
rno-miR-23b-3p	MIMAT0000793	Cd209b	288378	ENSRNOG00000029881	NA	NA	predicted	0.176	elmmo
rno-miR-23b-3p	MIMAT0000793	Tspan11	312727	ENSRNOG00000054360	NA	NA	predicted	0.176	elmmo
rno-miR-23b-3p	MIMAT0000793	Urb1	304104	ENSRNOG00000002080	NA	NA	predicted	0.176	elmmo
rno-miR-23b-3p	MIMAT0000793	Abhd6	305795	ENSRNOG00000008167	NA	NA	predicted	0.176	elmmo
rno-miR-23b-3p	MIMAT0000793	Nanp	311530	ENSRNOG00000008307	NA	NA	predicted	0.176	elmmo
rno-miR-23b-3p	MIMAT0000793	Rasgrp1	29434	ENSRNOG00000005404	NA	NA	predicted	0.176	elmmo
rno-miR-23b-3p	MIMAT0000793	Prickle2	312563	ENSRNOG00000012364	NA	NA	predicted	0.176	elmmo
rno-miR-23b-3p	MIMAT0000793	Ccdc47	303606	ENSRNOG00000009006	NA	NA	predicted	0.176	elmmo
rno-miR-23b-3p	MIMAT0000793	Prkd3	313834	ENSRNOG00000005289	NA	NA	predicted	0.176	elmmo
rno-miR-23b-3p	MIMAT0000793	Rcbtb1	361050	ENSRNOG00000021712	NA	NA	predicted	0.176	elmmo
rno-miR-23b-3p	MIMAT0000793	Ppfia2	362876	ENSRNOG00000004353	NA	NA	predicted	0.176	elmmo
rno-miR-23b-3p	MIMAT0000793	Moxd1	294119	ENSRNOG00000015321	NA	NA	predicted	0.176	elmmo
rno-miR-23b-3p	MIMAT0000793	Ptges3l1	367808	ENSRNOG00000060486	NA	NA	predicted	0.176	elmmo
rno-miR-23b-3p	MIMAT0000793	Palb2	293452	ENSRNOG00000025126	NA	NA	predicted	0.176	elmmo
rno-miR-23b-3p	MIMAT0000793	Rap1gap2	303298	ENSRNOG00000002652	NA	NA	predicted	0.176	elmmo
rno-miR-23b-3p	MIMAT0000793	RT1-S3	294228	ENSRNOG00000000777	NA	NA	predicted	0.176	elmmo
rno-miR-23b-3p	MIMAT0000793	S100b	25742	ENSRNOG00000001295	NA	NA	predicted	0.176	elmmo
rno-miR-23b-3p	MIMAT0000793	Egr4	25129	ENSRNOG00000015719	NA	NA	predicted	0.176	elmmo
rno-miR-23b-3p	MIMAT0000793	Cd302	295629	ENSRNOG00000006623	NA	NA	predicted	0.176	elmmo
rno-miR-23b-3p	MIMAT0000793	Tfrc	64678	ENSRNOG00000001766	NA	NA	predicted	0.176	elmmo
rno-miR-23b-3p	MIMAT0000793	Arl5b	364788	ENSRNOG00000018714	NA	NA	predicted	0.176	elmmo
rno-miR-23b-3p	MIMAT0000793	Neu1	24591	ENSRNOG00000032942	NA	NA	predicted	0.176	elmmo
rno-miR-23b-3p	MIMAT0000793	Smpx	84416	ENSRNOG00000007495	NA	NA	predicted	0.176	elmmo
rno-miR-23b-3p	MIMAT0000793	Srsf1	689890	ENSRNOG00000050323	NA	NA	predicted	0.176	elmmo
rno-miR-23b-3p	MIMAT0000793	Hyal4	404783	ENSRNOG00000007212	NA	NA	predicted	0.176	elmmo
rno-miR-23b-3p	MIMAT0000793	Gatad1	500005	ENSRNOG00000008613	NA	NA	predicted	0.176	elmmo
rno-miR-23b-3p	MIMAT0000793	Pkd2l1	293937	ENSRNOG00000012591	NA	NA	predicted	0.176	elmmo
rno-miR-23b-3p	MIMAT0000793	Hprt1	24465	ENSRNOG00000031367	NA	NA	predicted	0.176	elmmo
rno-miR-23b-3p	MIMAT0000793	Snx7	310815	ENSRNOG00000017077	NA	NA	predicted	0.176	elmmo
rno-miR-23b-3p	MIMAT0000793	Tmem135	293098	ENSRNOG00000016815	NA	NA	predicted	0.176	elmmo
rno-miR-23b-3p	MIMAT0000793	Acvrl1	25237	ENSRNOG00000028713	NA	NA	predicted	0.176	elmmo
rno-miR-23b-3p	MIMAT0000793	Lefty1	498299	ENSRNOG00000003263	NA	NA	predicted	0.176	elmmo
rno-miR-23b-3p	MIMAT0000793	Slc25a42	689414	ENSRNOG00000020345	NA	NA	predicted	0.176	elmmo
rno-miR-23b-3p	MIMAT0000793	E2f6	313978	ENSRNOG00000004449	NA	NA	predicted	0.176	elmmo
rno-miR-23b-3p	MIMAT0000793	Chrdl1	363455	ENSRNOG00000004330	NA	NA	predicted	0.176	elmmo
rno-miR-23b-3p	MIMAT0000793	Ankrd13c	685374	ENSRNOG00000011340	NA	NA	predicted	0.176	elmmo
rno-miR-23b-3p	MIMAT0000793	Lep	25608	ENSRNOG00000045797	NA	NA	predicted	0.176	elmmo
rno-miR-23b-3p	MIMAT0000793	Slc35c1	311204	ENSRNOG00000007732	NA	NA	predicted	0.176	elmmo
rno-miR-23b-3p	MIMAT0000793	Eltd1	64124	ENSRNOG00000033940	NA	NA	predicted	0.176	elmmo
rno-miR-23b-3p	MIMAT0000793	Cbll1	314028	ENSRNOG00000007253	NA	NA	predicted	0.176	elmmo
rno-miR-23b-3p	MIMAT0000793	Arpc5	360854	ENSRNOG00000028062	NA	NA	predicted	0.176	elmmo
rno-miR-23b-3p	MIMAT0000793	Zfp26	367033	ENSRNOG00000025937	NA	NA	predicted	0.176	elmmo
rno-miR-23b-3p	MIMAT0000793	Agpat5	306582	ENSRNOG00000028623	NA	NA	predicted	0.176	elmmo
rno-miR-23b-3p	MIMAT0000793	Shc1	85385	ENSRNOG00000020657	NA	NA	predicted	0.176	elmmo
rno-miR-23b-3p	MIMAT0000793	Prpf38a	298374	ENSRNOG00000009451	NA	NA	predicted	0.176	elmmo
rno-miR-23b-3p	MIMAT0000793	Itm2b	290364	ENSRNOG00000016271	NA	NA	predicted	0.176	elmmo
rno-miR-23b-3p	MIMAT0000793	Id3	25585	ENSRNOG00000026124	NA	NA	predicted	0.176	elmmo
rno-miR-23b-3p	MIMAT0000793	Rnf146	308051	ENSRNOG00000011588	NA	NA	predicted	0.176	elmmo
rno-miR-23b-3p	MIMAT0000793	Mttp	310900	ENSRNOG00000010655	NA	NA	predicted	0.176	elmmo
rno-miR-23b-3p	MIMAT0000793	Asic5	63866	ENSRNOG00000011842	NA	NA	predicted	0.176	elmmo
rno-miR-23b-3p	MIMAT0000793	Marc2	171451	ENSRNOG00000037850	NA	NA	predicted	0.176	elmmo
rno-miR-23b-3p	MIMAT0000793	Nxpe3	681096	ENSRNOG00000001608	NA	NA	predicted	0.176	elmmo
rno-miR-23b-3p	MIMAT0000793	LOC100912917	287420	ENSRNOG00000005193	NA	NA	predicted	0.176	elmmo
rno-miR-23b-3p	MIMAT0000793	Rnf152	293561	ENSRNOG00000014859	NA	NA	predicted	0.176	elmmo
rno-miR-23b-3p	MIMAT0000793	Ccl1	688605	ENSRNOG00000021851	NA	NA	predicted	0.176	elmmo
rno-miR-23b-3p	MIMAT0000793	Ppp4r2	297486	ENSRNOG00000024647	NA	NA	predicted	0.176	elmmo
rno-miR-23b-3p	MIMAT0000793	Fam53b	309060	ENSRNOG00000061348	NA	NA	predicted	0.176	elmmo
rno-miR-23b-3p	MIMAT0000793	Slc18a2	25549	ENSRNOG00000008890	NA	NA	predicted	0.176	elmmo
rno-miR-23b-3p	MIMAT0000793	Larp4b	307070	ENSRNOG00000015888	NA	NA	predicted	0.176	elmmo
rno-miR-23b-3p	MIMAT0000793	Mdm4	304798	ENSRNOG00000009696	NA	NA	predicted	0.176	elmmo
rno-miR-23b-3p	MIMAT0000793	S1pr2	29415	ENSRNOG00000020653	NA	NA	predicted	0.176	elmmo
rno-miR-23b-3p	MIMAT0000793	RGD1560010	310537	ENSRNOG00000010071	NA	NA	predicted	0.176	elmmo
rno-miR-23b-3p	MIMAT0000793	Nphp4	313749	ENSRNOG00000011967	NA	NA	predicted	0.176	elmmo
rno-miR-23b-3p	MIMAT0000793	Akap8	116633	ENSRNOG00000006559	NA	NA	predicted	0.176	elmmo
rno-miR-23b-3p	MIMAT0000793	Shisa7	691429	ENSRNOG00000016877	NA	NA	predicted	0.176	elmmo
rno-miR-23b-3p	MIMAT0000793	P2ry10	317219	ENSRNOG00000037839	NA	NA	predicted	0.176	elmmo
rno-miR-23b-3p	MIMAT0000793	Ccdc152	499536	ENSRNOG00000039473	NA	NA	predicted	0.176	elmmo
rno-miR-23b-3p	MIMAT0000793	Taf9b	171152	ENSRNOG00000061102	NA	NA	predicted	0.176	elmmo
rno-miR-23b-3p	MIMAT0000793	Cd59	25407	ENSRNOG00000042821	NA	NA	predicted	0.176	elmmo
rno-miR-23b-3p	MIMAT0000793	Tmem33	59303	ENSRNOG00000002254	NA	NA	predicted	0.176	elmmo
rno-miR-23b-3p	MIMAT0000793	Klhl9	313348	ENSRNOG00000006335	NA	NA	predicted	0.176	elmmo
rno-miR-23b-3p	MIMAT0000793	Veph1	361954	ENSRNOG00000012427	NA	NA	predicted	0.176	elmmo
rno-miR-23b-3p	MIMAT0000793	Hhex	79237	ENSRNOG00000016595	NA	NA	predicted	0.176	elmmo
rno-miR-23b-3p	MIMAT0000793	Sowahc	503306	ENSRNOG00000048831	NA	NA	predicted	0.176	elmmo
rno-miR-23b-3p	MIMAT0000793	Gria3	29628	ENSRNOG00000007682	NA	NA	predicted	0.176	elmmo
rno-miR-23b-3p	MIMAT0000793	Lmtk2	304286	ENSRNOG00000025155	NA	NA	predicted	0.176	elmmo
rno-miR-23b-3p	MIMAT0000793	RGD1311224	295714	ENSRNOG00000009399	NA	NA	predicted	0.176	elmmo
rno-miR-23b-3p	MIMAT0000793	Upp2	295620	ENSRNOG00000005341	NA	NA	predicted	0.176	elmmo
rno-miR-23b-3p	MIMAT0000793	Tgfbrap1	301373	ENSRNOG00000024562	NA	NA	predicted	0.176	elmmo
rno-miR-23b-3p	MIMAT0000793	Gja4	25655	ENSRNOG00000014357	NA	NA	predicted	0.176	elmmo
rno-miR-23b-3p	MIMAT0000793	Tgs1	312947	ENSRNOG00000008156	NA	NA	predicted	0.176	elmmo
rno-miR-23b-3p	MIMAT0000793	Ndst1	29633	ENSRNOG00000019014	NA	NA	predicted	0.176	elmmo
rno-miR-23b-3p	MIMAT0000793	Tgfbi	116487	ENSRNOG00000012216	NA	NA	predicted	0.176	elmmo
rno-miR-23b-3p	MIMAT0000793	Dpy19l4	297824	ENSRNOG00000025416	NA	NA	predicted	0.136	elmmo
rno-miR-23b-3p	MIMAT0000793	Ddah1	64157	ENSRNOG00000014613	NA	NA	predicted	0.136	elmmo
rno-miR-23b-3p	MIMAT0000793	Prmt2	360548	ENSRNOG00000045670	NA	NA	predicted	0.116	elmmo
rno-miR-23b-3p	MIMAT0000793	Ufm1	365797	ENSRNOG00000038176	NA	NA	predicted	0.116	elmmo
rno-miR-23b-3p	MIMAT0000793	Hddc2	361462	ENSRNOG00000021442	NA	NA	predicted	0.116	elmmo
rno-miR-23b-3p	MIMAT0000793	Tiprl	360869	ENSRNOG00000003048	NA	NA	predicted	0.116	elmmo
rno-miR-23b-3p	MIMAT0000793	Tnfsf12	360548	ENSRNOG00000045670	NA	NA	predicted	0.116	elmmo
rno-miR-23b-3p	MIMAT0000793	Nnt	310378	ENSRNOG00000026842	NA	NA	predicted	0.116	elmmo
rno-miR-23b-3p	MIMAT0000793	Olr522	295776	ENSRNOG00000049234	NA	NA	predicted	19.0915	microcosm
rno-miR-23b-3p	MIMAT0000793	Pold2	289758	ENSRNOG00000014098	NA	NA	predicted	18.7465	microcosm
rno-miR-23b-3p	MIMAT0000793	RGD1563680	499864	ENSRNOG00000004571	NA	NA	predicted	18.604	microcosm
rno-miR-23b-3p	MIMAT0000793	Ctsj	29174	ENSRNOG00000046476	NA	NA	predicted	18.5179	microcosm
rno-miR-23b-3p	MIMAT0000793	Scgb1d2	309203	ENSRNOG00000020294	NA	NA	predicted	18.5179	microcosm
rno-miR-23b-3p	MIMAT0000793	Sv2c	29643	ENSRNOG00000018094	NA	NA	predicted	18.4036	microcosm
rno-miR-23b-3p	MIMAT0000793	Fam103a1	293058	ENSRNOG00000019426	NA	NA	predicted	18.3281	microcosm
rno-miR-23b-3p	MIMAT0000793	RGD1560584		ENSRNOG00000038437	NA	NA	predicted	18.3111	microcosm
rno-miR-23b-3p	MIMAT0000793	Atg4c	313391	ENSRNOG00000008767	NA	NA	predicted	18.224	microcosm
rno-miR-23b-3p	MIMAT0000793	Tmem74	500864	ENSRNOG00000005114	NA	NA	predicted	18.191	microcosm
rno-miR-23b-3p	MIMAT0000793	Nup93	291874	ENSRNOG00000018564	NA	NA	predicted	18.1749	microcosm
rno-miR-23b-3p	MIMAT0000793	LOC297793			NA	NA	predicted	18.1333	microcosm
rno-miR-23b-3p	MIMAT0000793	LOC503000			NA	NA	predicted	18.0968	microcosm
rno-miR-23b-3p	MIMAT0000793	Il23a	155140	ENSRNOG00000003254	NA	NA	predicted	18.0574	microcosm
rno-miR-23b-3p	MIMAT0000793	Smn1	64301	ENSRNOG00000018067	NA	NA	predicted	18.0291	microcosm
rno-miR-23b-3p	MIMAT0000793	Klhdc1_predicted			NA	NA	predicted	17.9557	microcosm
rno-miR-23b-3p	MIMAT0000793	Gk2	289481	ENSRNOG00000029397	NA	NA	predicted	17.9463	microcosm
rno-miR-23b-3p	MIMAT0000793	Q63311_RAT			NA	NA	predicted	17.9249	microcosm
rno-miR-23b-3p	MIMAT0000793	LOC313749			NA	NA	predicted	17.9067	microcosm
rno-miR-23b-3p	MIMAT0000793	RGD1559505_predicted			NA	NA	predicted	17.8371	microcosm
rno-miR-23b-3p	MIMAT0000793	Gamt	25257	ENSRNOG00000024577	NA	NA	predicted	17.832	microcosm
rno-miR-23b-3p	MIMAT0000793	LOC100909519		ENSRNOG00000046570	NA	NA	predicted	17.832	microcosm
rno-miR-23b-3p	MIMAT0000793	St7l	295344	ENSRNOG00000014002	NA	NA	predicted	17.832	microcosm
rno-miR-23b-3p	MIMAT0000793	RGD1563579		ENSRNOG00000046570	NA	NA	predicted	17.832	microcosm
rno-miR-23b-3p	MIMAT0000793	Dyt1			NA	NA	predicted	17.8297	microcosm
rno-miR-23b-3p	MIMAT0000793	RGD1564720_predicted			NA	NA	predicted	17.8207	microcosm
rno-miR-23b-3p	MIMAT0000793	RGD1564376_predicted			NA	NA	predicted	17.8207	microcosm
rno-miR-23b-3p	MIMAT0000793	Arhgap27	303583	ENSRNOG00000028569	NA	NA	predicted	17.8207	microcosm
rno-miR-23b-3p	MIMAT0000793	Olr1006	288886	ENSRNOG00000032428	NA	NA	predicted	17.7594	microcosm
rno-miR-23b-3p	MIMAT0000793	Ccl2	24770	ENSRNOG00000007159	NA	NA	predicted	17.7177	microcosm
rno-miR-23b-3p	MIMAT0000793	Acot9	302640	ENSRNOG00000003782	NA	NA	predicted	17.7177	microcosm
rno-miR-23b-3p	MIMAT0000793	Vrk3	361565	ENSRNOG00000026517	NA	NA	predicted	17.7177	microcosm
rno-miR-23b-3p	MIMAT0000793	Chd8	65027	ENSRNOG00000025011	NA	NA	predicted	17.7177	microcosm
rno-miR-23b-3p	MIMAT0000793	RGD1309571			NA	NA	predicted	17.7177	microcosm
rno-miR-23b-3p	MIMAT0000793	Fhod3	100360334	ENSRNOG00000027230	NA	NA	predicted	17.7164	microcosm
rno-miR-23b-3p	MIMAT0000793	RGD1307284_predicted			NA	NA	predicted	17.7164	microcosm
rno-miR-23b-3p	MIMAT0000793	Amfr	361367	ENSRNOG00000019444	NA	NA	predicted	17.7164	microcosm
rno-miR-23b-3p	MIMAT0000793	Auh	361215	ENSRNOG00000011684	NA	NA	predicted	17.7141	microcosm
rno-miR-23b-3p	MIMAT0000793	Efhc2	302507	ENSRNOG00000002986	NA	NA	predicted	17.6965	microcosm
rno-miR-23b-3p	MIMAT0000793	Sgcg	305941	ENSRNOG00000014603	NA	NA	predicted	17.6629	microcosm
rno-miR-23b-3p	MIMAT0000793	Man1b1	499751	ENSRNOG00000012559	NA	NA	predicted	17.6122	microcosm
rno-miR-23b-3p	MIMAT0000793	Recc1			NA	NA	predicted	17.6122	microcosm
rno-miR-23b-3p	MIMAT0000793	Napb	499903	ENSRNOG00000004753	NA	NA	predicted	17.6034	microcosm
rno-miR-23b-3p	MIMAT0000793	Ptgds	25526	ENSRNOG00000015550	NA	NA	predicted	17.6034	microcosm
rno-miR-23b-3p	MIMAT0000793	LOC679725			NA	NA	predicted	17.5914	microcosm
rno-miR-23b-3p	MIMAT0000793	LOC100361952		ENSRNOG00000038376	NA	NA	predicted	17.5737	microcosm
rno-miR-23b-3p	MIMAT0000793	Dmrtc1b		ENSRNOG00000022286	NA	NA	predicted	17.5635	microcosm
rno-miR-23b-3p	MIMAT0000793	RGD1566264	102554992	ENSRNOG00000036836	NA	NA	predicted	17.5619	microcosm
rno-miR-23b-3p	MIMAT0000793	Slc28a3	140944	ENSRNOG00000018853	NA	NA	predicted	17.554	microcosm
rno-miR-23b-3p	MIMAT0000793	Olr792	296044	ENSRNOG00000031514	NA	NA	predicted	17.5422	microcosm
rno-miR-23b-3p	MIMAT0000793	LOC502660	502660	ENSRNOG00000031514	NA	NA	predicted	17.5422	microcosm
rno-miR-23b-3p	MIMAT0000793	Prkar2a	29699	ENSRNOG00000020284	NA	NA	predicted	17.4891	microcosm
rno-miR-23b-3p	MIMAT0000793	RGD1564138		ENSRNOG00000037172	NA	NA	predicted	17.4891	microcosm
rno-miR-23b-3p	MIMAT0000793	Gria2	29627	ENSRNOG00000054204	NA	NA	predicted	17.4891	microcosm
rno-miR-23b-3p	MIMAT0000793	Rpl29	684399	ENSRNOG00000011138	NA	NA	predicted	17.4891	microcosm
rno-miR-23b-3p	MIMAT0000793	RGD1559877	364828	ENSRNOG00000030439	NA	NA	predicted	17.4891	microcosm
rno-miR-23b-3p	MIMAT0000793	LOC683050			NA	NA	predicted	17.4669	microcosm
rno-miR-23b-3p	MIMAT0000793	2004-09-01	287606	ENSRNOG00000007367	NA	NA	predicted	17.4592	microcosm
rno-miR-23b-3p	MIMAT0000793	Zscan21	304342	ENSRNOG00000039234	NA	NA	predicted	17.4357	microcosm
rno-miR-23b-3p	MIMAT0000793	LOC500845		ENSRNOG00000029354	NA	NA	predicted	17.4273	microcosm
rno-miR-23b-3p	MIMAT0000793	Ambn	25376	ENSRNOG00000003718	NA	NA	predicted	17.4181	microcosm
rno-miR-23b-3p	MIMAT0000793	Olr530	295786	ENSRNOG00000045546	NA	NA	predicted	17.4038	microcosm
rno-miR-23b-3p	MIMAT0000793	Bcl10	83477	ENSRNOG00000042389	NA	NA	predicted	17.4038	microcosm
rno-miR-23b-3p	MIMAT0000793	Olr532	295786	ENSRNOG00000045546	NA	NA	predicted	17.4038	microcosm
rno-miR-23b-3p	MIMAT0000793	RGD1561893_predicted			NA	NA	predicted	17.4038	microcosm
rno-miR-23b-3p	MIMAT0000793	Zfp248	500304	ENSRNOG00000037251	NA	NA	predicted	17.4038	microcosm
rno-miR-23b-3p	MIMAT0000793	Olr528	295786	ENSRNOG00000045546	NA	NA	predicted	17.4038	microcosm
rno-miR-23b-3p	MIMAT0000793			ENSRNOG00000050524	NA	NA	predicted	17.4038	microcosm
rno-miR-23b-3p	MIMAT0000793	Aptx	259271	ENSRNOG00000006582	NA	NA	predicted	17.4038	microcosm
rno-miR-23b-3p	MIMAT0000793	Zfp455	286979	ENSRNOG00000031576	NA	NA	predicted	17.3898	microcosm
rno-miR-23b-3p	MIMAT0000793	Mcm5_predicted			NA	NA	predicted	17.3796	microcosm
rno-miR-23b-3p	MIMAT0000793	Stk35_predicted			NA	NA	predicted	17.3748	microcosm
rno-miR-23b-3p	MIMAT0000793	Ddx25	58856	ENSRNOG00000012260	NA	NA	predicted	17.3748	microcosm
rno-miR-23b-3p	MIMAT0000793	Sstr5	25354	ENSRNOG00000018834	NA	NA	predicted	17.3748	microcosm
rno-miR-23b-3p	MIMAT0000793	Psbpc2	293731	ENSRNOG00000020301	NA	NA	predicted	17.3748	microcosm
rno-miR-23b-3p	MIMAT0000793	LOC688526	688526	ENSRNOG00000027239	NA	NA	predicted	17.3735	microcosm
rno-miR-23b-3p	MIMAT0000793	Tesk2	170908	ENSRNOG00000017282	NA	NA	predicted	17.358	microcosm
rno-miR-23b-3p	MIMAT0000793	Dmgdh	245961	ENSRNOG00000023588	NA	NA	predicted	17.3578	microcosm
rno-miR-23b-3p	MIMAT0000793	LOC500591			NA	NA	predicted	17.3575	microcosm
rno-miR-23b-3p	MIMAT0000793	3100002H09Rik			NA	NA	predicted	17.3546	microcosm
rno-miR-23b-3p	MIMAT0000793	Txndc9	280671	ENSRNOG00000018593	NA	NA	predicted	17.323	microcosm
rno-miR-23b-3p	MIMAT0000793	Olr1609	405328	ENSRNOG00000012526	NA	NA	predicted	17.2996	microcosm
rno-miR-23b-3p	MIMAT0000793	Rnps1	287113	ENSRNOG00000008703	NA	NA	predicted	17.2996	microcosm
rno-miR-23b-3p	MIMAT0000793	Tgoln2	192152	ENSRNOG00000014617	NA	NA	predicted	17.2996	microcosm
rno-miR-23b-3p	MIMAT0000793	Gpr50	117097	ENSRNOG00000011335	NA	NA	predicted	17.2996	microcosm
rno-miR-23b-3p	MIMAT0000793	Gpr98		ENSRNOG00000016306	NA	NA	predicted	17.2996	microcosm
rno-miR-23b-3p	MIMAT0000793	NP_001013945.1			NA	NA	predicted	17.292	microcosm
rno-miR-23b-3p	MIMAT0000793	Cnnm2	294014	ENSRNOG00000020113	NA	NA	predicted	17.2868	microcosm
rno-miR-23b-3p	MIMAT0000793	Mrgprf	266762	ENSRNOG00000013426	NA	NA	predicted	17.282	microcosm
rno-miR-23b-3p	MIMAT0000793	Dmbx1	313512	ENSRNOG00000010835	NA	NA	predicted	17.2673	microcosm
rno-miR-23b-3p	MIMAT0000793	Cops3	287367	ENSRNOG00000053943	NA	NA	predicted	17.2605	microcosm
rno-miR-23b-3p	MIMAT0000793	Defb40	641637	ENSRNOG00000033538	NA	NA	predicted	17.258	microcosm
rno-miR-23b-3p	MIMAT0000793	Dnm1	140694	ENSRNOG00000033835	NA	NA	predicted	17.2444	microcosm
rno-miR-23b-3p	MIMAT0000793	RGD1561327_predicted			NA	NA	predicted	17.241	microcosm
rno-miR-23b-3p	MIMAT0000793	Pdlim1	54133	ENSRNOG00000016166	NA	NA	predicted	17.2367	microcosm
rno-miR-23b-3p	MIMAT0000793	Acvr1c	245921	ENSRNOG00000004828	NA	NA	predicted	17.2264	microcosm
rno-miR-23b-3p	MIMAT0000793	Shisa3	498356	ENSRNOG00000025670	NA	NA	predicted	17.2234	microcosm
rno-miR-23b-3p	MIMAT0000793	LOC680848			NA	NA	predicted	17.2186	microcosm
rno-miR-23b-3p	MIMAT0000793	RGD1562366_predicted			NA	NA	predicted	17.1954	microcosm
rno-miR-23b-3p	MIMAT0000793	Gbx1	246149	ENSRNOG00000013369	NA	NA	predicted	17.1954	microcosm
rno-miR-23b-3p	MIMAT0000793	Slc8a1	29715	ENSRNOG00000008479	NA	NA	predicted	17.1944	microcosm
rno-miR-23b-3p	MIMAT0000793	RGD1560672	498270	ENSRNOG00000025005	NA	NA	predicted	17.1767	microcosm
rno-miR-23b-3p	MIMAT0000793	Defb43	641651	ENSRNOG00000038759	NA	NA	predicted	17.1755	microcosm
rno-miR-23b-3p	MIMAT0000793	Btnl7	100911983	ENSRNOG00000000446	NA	NA	predicted	17.1462	microcosm
rno-miR-23b-3p	MIMAT0000793	Stag1_predicted			NA	NA	predicted	17.1462	microcosm
rno-miR-23b-3p	MIMAT0000793	Iars2	364070	ENSRNOG00000002368	NA	NA	predicted	17.1462	microcosm
rno-miR-23b-3p	MIMAT0000793	RGD1566073		ENSRNOG00000028320	NA	NA	predicted	17.1462	microcosm
rno-miR-23b-3p	MIMAT0000793	Spam1	117037	ENSRNOG00000007231	NA	NA	predicted	17.1462	microcosm
rno-miR-23b-3p	MIMAT0000793	Gatm	81660	ENSRNOG00000000168	NA	NA	predicted	17.1462	microcosm
rno-miR-23b-3p	MIMAT0000793	Grm3	24416	ENSRNOG00000005519	NA	NA	predicted	17.1462	microcosm
rno-miR-23b-3p	MIMAT0000793	Mdc1	309595	ENSRNOG00000032813	NA	NA	predicted	17.1298	microcosm
rno-miR-23b-3p	MIMAT0000793	Pln	64672	ENSRNOG00000000413	NA	NA	predicted	17.1162	microcosm
rno-miR-23b-3p	MIMAT0000793	Aldh1a3	266603	ENSRNOG00000013028	NA	NA	predicted	17.1142	microcosm
rno-miR-23b-3p	MIMAT0000793	Amacr	25284	ENSRNOG00000018662	NA	NA	predicted	17.1072	microcosm
rno-miR-23b-3p	MIMAT0000793	LOC501718			NA	NA	predicted	17.0912	microcosm
rno-miR-23b-3p	MIMAT0000793	Erbb2	102552659	ENSRNOG00000049238	NA	NA	predicted	17.0912	microcosm
rno-miR-23b-3p	MIMAT0000793	RGD1309522			NA	NA	predicted	17.0912	microcosm
rno-miR-23b-3p	MIMAT0000793	Nbr1	303554	ENSRNOG00000020730	NA	NA	predicted	17.0912	microcosm
rno-miR-23b-3p	MIMAT0000793	Cutc	361760	ENSRNOG00000017298	NA	NA	predicted	17.0795	microcosm
rno-miR-23b-3p	MIMAT0000793	Slain2	305310	ENSRNOG00000002271	NA	NA	predicted	17.0595	microcosm
rno-miR-23b-3p	MIMAT0000793	Shoc2	309548	ENSRNOG00000015339	NA	NA	predicted	17.0595	microcosm
rno-miR-23b-3p	MIMAT0000793	LOC680058		ENSRNOG00000026891	NA	NA	predicted	17.0569	microcosm
rno-miR-23b-3p	MIMAT0000793	Kcnk1	59324	ENSRNOG00000019937	NA	NA	predicted	17.0549	microcosm
rno-miR-23b-3p	MIMAT0000793	Zfp318	685082	ENSRNOG00000018741	NA	NA	predicted	17.0516	microcosm
rno-miR-23b-3p	MIMAT0000793	Lrrn3	81514	ENSRNOG00000006368	NA	NA	predicted	17.0319	microcosm
rno-miR-23b-3p	MIMAT0000793	Nat8b	171084	ENSRNOG00000015851	NA	NA	predicted	17.0319	microcosm
rno-miR-23b-3p	MIMAT0000793	Zfp281	305083	ENSRNOG00000058643	NA	NA	predicted	17.0319	microcosm
rno-miR-23b-3p	MIMAT0000793	Ada	24165	ENSRNOG00000010265	NA	NA	predicted	17.0319	microcosm
rno-miR-23b-3p	MIMAT0000793	Ubfd1	293454	ENSRNOG00000018243	NA	NA	predicted	17.0319	microcosm
rno-miR-23b-3p	MIMAT0000793	Olr1560_predicted			NA	NA	predicted	17.0073	microcosm
rno-miR-23b-3p	MIMAT0000793	Zfp131	310375	ENSRNOG00000015925	NA	NA	predicted	17.0039	microcosm
rno-miR-23b-3p	MIMAT0000793	LOC102549291	102549291	ENSRNOG00000050230	NA	NA	predicted	16.9869	microcosm
rno-miR-23b-3p	MIMAT0000793	Cort	117548	ENSRNOG00000030317	NA	NA	predicted	16.9869	microcosm
rno-miR-23b-3p	MIMAT0000793	Traf4	303285	ENSRNOG00000013169	NA	NA	predicted	16.9869	microcosm
rno-miR-23b-3p	MIMAT0000793	XR_001998.1			NA	NA	predicted	16.9869	microcosm
rno-miR-23b-3p	MIMAT0000793	Usp48	362636	ENSRNOG00000013602	NA	NA	predicted	16.9869	microcosm
rno-miR-23b-3p	MIMAT0000793	Fbxl18	100359528	ENSRNOG00000001117	NA	NA	predicted	16.9869	microcosm
rno-miR-23b-3p	MIMAT0000793	LOC100909844	100359528	ENSRNOG00000001117	NA	NA	predicted	16.9869	microcosm
rno-miR-23b-3p	MIMAT0000793	Pgr15l	296867	ENSRNOG00000021547	NA	NA	predicted	16.9869	microcosm
rno-miR-23b-3p	MIMAT0000793	Dstn	502674	ENSRNOG00000005924	NA	NA	predicted	16.9869	microcosm
rno-miR-23b-3p	MIMAT0000793	LOC102555578	102555578	ENSRNOG00000050230	NA	NA	predicted	16.9869	microcosm
rno-miR-23b-3p	MIMAT0000793	Sirt1	309757	ENSRNOG00000000380	NA	NA	predicted	16.9869	microcosm
rno-miR-23b-3p	MIMAT0000793	ENSMUSG00000070586			NA	NA	predicted	16.9869	microcosm
rno-miR-23b-3p	MIMAT0000793	Wdr90	102555298	ENSRNOG00000020006	NA	NA	predicted	16.9869	microcosm
rno-miR-23b-3p	MIMAT0000793	E2f5	116651	ENSRNOG00000010760	NA	NA	predicted	16.9869	microcosm
rno-miR-23b-3p	MIMAT0000793	Slc7a2	64554	ENSRNOG00000011016	NA	NA	predicted	16.9869	microcosm
rno-miR-23b-3p	MIMAT0000793	F13b	289055	ENSRNOG00000012613	NA	NA	predicted	16.9869	microcosm
rno-miR-23b-3p	MIMAT0000793	RGD1565987_predicted			NA	NA	predicted	16.9869	microcosm
rno-miR-23b-3p	MIMAT0000793	Lias	305348	ENSRNOG00000002759	NA	NA	predicted	16.9835	microcosm
rno-miR-23b-3p	MIMAT0000793	Zcchc9	309986	ENSRNOG00000051682	NA	NA	predicted	16.9783	microcosm
rno-miR-23b-3p	MIMAT0000793	Tra2b	117259	ENSRNOG00000001783	NA	NA	predicted	16.9391	microcosm
rno-miR-23b-3p	MIMAT0000793	LOC100911147	100911147	ENSRNOG00000042719	NA	NA	predicted	16.9256	microcosm
rno-miR-23b-3p	MIMAT0000793	Olr1069	362821	ENSRNOG00000033263	NA	NA	predicted	16.9256	microcosm
rno-miR-23b-3p	MIMAT0000793	Taar8b	319105	ENSRNOG00000047463	NA	NA	predicted	16.9235	microcosm
rno-miR-23b-3p	MIMAT0000793	Taar8c	319106	ENSRNOG00000047463	NA	NA	predicted	16.9235	microcosm
rno-miR-23b-3p	MIMAT0000793	Fat3	191571	ENSRNOG00000011585	NA	NA	predicted	16.9202	microcosm
rno-miR-23b-3p	MIMAT0000793	Clcnkb	79430	ENSRNOG00000009897	NA	NA	predicted	16.9201	microcosm
rno-miR-23b-3p	MIMAT0000793	Lrrc66	289587	ENSRNOG00000026585	NA	NA	predicted	16.9187	microcosm
rno-miR-23b-3p	MIMAT0000793	Mmp12	117033	ENSRNOG00000030187	NA	NA	predicted	16.9176	microcosm
rno-miR-23b-3p	MIMAT0000793	MGC95210	287798	ENSRNOG00000024780	NA	NA	predicted	16.9176	microcosm
rno-miR-23b-3p	MIMAT0000793	Hsd17b4	79244	ENSRNOG00000015840	NA	NA	predicted	16.9176	microcosm
rno-miR-23b-3p	MIMAT0000793	Pdgfa	25266	ENSRNOG00000001312	NA	NA	predicted	16.9176	microcosm
rno-miR-23b-3p	MIMAT0000793	Dnajc25	362526	ENSRNOG00000015340	NA	NA	predicted	16.9176	microcosm
rno-miR-23b-3p	MIMAT0000793	Asgr1	24210	ENSRNOG00000018693	NA	NA	predicted	16.9176	microcosm
rno-miR-23b-3p	MIMAT0000793	Slc4a7	117955	ENSRNOG00000005957	NA	NA	predicted	16.9176	microcosm
rno-miR-23b-3p	MIMAT0000793	XR_005973.1			NA	NA	predicted	16.9081	microcosm
rno-miR-23b-3p	MIMAT0000793	Vom1r6	494231	ENSRNOG00000045958	NA	NA	predicted	16.9081	microcosm
rno-miR-23b-3p	MIMAT0000793	Vom1r38	494307	ENSRNOG00000038644	NA	NA	predicted	16.8827	microcosm
rno-miR-23b-3p	MIMAT0000793	Ctsql2	100364523	ENSRNOG00000026013	NA	NA	predicted	16.8827	microcosm
rno-miR-23b-3p	MIMAT0000793	Stk33	690861	ENSRNOG00000014590	NA	NA	predicted	16.8827	microcosm
rno-miR-23b-3p	MIMAT0000793	Rhbdd2	360793	ENSRNOG00000001443	NA	NA	predicted	16.8827	microcosm
rno-miR-23b-3p	MIMAT0000793	LOC685144			NA	NA	predicted	16.8827	microcosm
rno-miR-23b-3p	MIMAT0000793	Ascc3	309887	ENSRNOG00000037604	NA	NA	predicted	16.8827	microcosm
rno-miR-23b-3p	MIMAT0000793	Myo6	315840	ENSRNOG00000011852	NA	NA	predicted	16.8651	microcosm
rno-miR-23b-3p	MIMAT0000793	Rmdn3	311328	ENSRNOG00000011690	NA	NA	predicted	16.8607	microcosm
rno-miR-23b-3p	MIMAT0000793	Ccnc	114839	ENSRNOG00000007719	NA	NA	predicted	16.8607	microcosm
rno-miR-23b-3p	MIMAT0000793	Cage1	306872	ENSRNOG00000024111	NA	NA	predicted	16.8607	microcosm
rno-miR-23b-3p	MIMAT0000793	RT1-CE10	414792	ENSRNOG00000050210	NA	NA	predicted	16.8547	microcosm
rno-miR-23b-3p	MIMAT0000793	Bcl2l14	500348	ENSRNOG00000028632	NA	NA	predicted	16.8463	microcosm
rno-miR-23b-3p	MIMAT0000793	Crhr1	58959	ENSRNOG00000004900	NA	NA	predicted	16.8458	microcosm
rno-miR-23b-3p	MIMAT0000793	LOC500331	100910725	ENSRNOG00000030823	NA	NA	predicted	16.8268	microcosm
rno-miR-23b-3p	MIMAT0000793	Rictor	310131	ENSRNOG00000011341	NA	NA	predicted	16.8268	microcosm
rno-miR-23b-3p	MIMAT0000793	Cd84	501872	ENSRNOG00000022884	NA	NA	predicted	16.819	microcosm
rno-miR-23b-3p	MIMAT0000793	4930529M08Rik			NA	NA	predicted	16.8041	microcosm
rno-miR-23b-3p	MIMAT0000793	Prl2a1	116474	ENSRNOG00000016463	NA	NA	predicted	16.8033	microcosm
rno-miR-23b-3p	MIMAT0000793	Snx5	296199	ENSRNOG00000006077	NA	NA	predicted	16.8033	microcosm
rno-miR-23b-3p	MIMAT0000793	Tnfrsf17	287034	ENSRNOG00000021987	NA	NA	predicted	16.8033	microcosm
rno-miR-23b-3p	MIMAT0000793	Magoh	298385	ENSRNOG00000012778	NA	NA	predicted	16.8033	microcosm
rno-miR-23b-3p	MIMAT0000793	Mrlcb			NA	NA	predicted	16.8033	microcosm
rno-miR-23b-3p	MIMAT0000793	Nudcd2	287199	ENSRNOG00000060914	NA	NA	predicted	16.8033	microcosm
rno-miR-23b-3p	MIMAT0000793	Itpkb	54260	ENSRNOG00000002969	NA	NA	predicted	16.8033	microcosm
rno-miR-23b-3p	MIMAT0000793	Phf7	364510	ENSRNOG00000018996	NA	NA	predicted	16.8033	microcosm
rno-miR-23b-3p	MIMAT0000793	Kpna2	85245	ENSRNOG00000015329	NA	NA	predicted	16.8033	microcosm
rno-miR-23b-3p	MIMAT0000793	Olr1443	287331	ENSRNOG00000046777	NA	NA	predicted	16.7785	microcosm
rno-miR-23b-3p	MIMAT0000793	Pik3r3	60664	ENSRNOG00000000145	NA	NA	predicted	16.7785	microcosm
rno-miR-23b-3p	MIMAT0000793	Crb1_predicted			NA	NA	predicted	16.7785	microcosm
rno-miR-23b-3p	MIMAT0000793	RGD1561670_predicted			NA	NA	predicted	16.7785	microcosm
rno-miR-23b-3p	MIMAT0000793	Taar7c	494535	ENSRNOG00000047825	NA	NA	predicted	16.7785	microcosm
rno-miR-23b-3p	MIMAT0000793	Abcb6	140669	ENSRNOG00000018697	NA	NA	predicted	16.7785	microcosm
rno-miR-23b-3p	MIMAT0000793	Med23	309565	ENSRNOG00000013422	NA	NA	predicted	16.7772	microcosm
rno-miR-23b-3p	MIMAT0000793	Zfp403			NA	NA	predicted	16.7723	microcosm
rno-miR-23b-3p	MIMAT0000793	RT1-A1	24973	ENSRNOG00000038999	NA	NA	predicted	16.7623	microcosm
rno-miR-23b-3p	MIMAT0000793	Cyp3a73	100910877	ENSRNOG00000032560	NA	NA	predicted	16.7556	microcosm
rno-miR-23b-3p	MIMAT0000793	LOC100910877	100910877	ENSRNOG00000032560	NA	NA	predicted	16.7556	microcosm
rno-miR-23b-3p	MIMAT0000793	Cyp3a23/3a1	100910877	ENSRNOG00000032560	NA	NA	predicted	16.7556	microcosm
rno-miR-23b-3p	MIMAT0000793	Rhcg	293048	ENSRNOG00000015526	NA	NA	predicted	16.7484	microcosm
rno-miR-23b-3p	MIMAT0000793	Cryl1	290277	ENSRNOG00000008989	NA	NA	predicted	16.7437	microcosm
rno-miR-23b-3p	MIMAT0000793	Tim2			NA	NA	predicted	16.7401	microcosm
rno-miR-23b-3p	MIMAT0000793	Csen			NA	NA	predicted	16.7373	microcosm
rno-miR-23b-3p	MIMAT0000793	Timm21	307210	ENSRNOG00000015142	NA	NA	predicted	16.7347	microcosm
rno-miR-23b-3p	MIMAT0000793	Upp2_predicted			NA	NA	predicted	16.7171	microcosm
rno-miR-23b-3p	MIMAT0000793	Hmbox1	305968	ENSRNOG00000013326	NA	NA	predicted	16.7153	microcosm
rno-miR-23b-3p	MIMAT0000793	Q3U5A7_MOUSE			NA	NA	predicted	16.7069	microcosm
rno-miR-23b-3p	MIMAT0000793	Tex38	690079	ENSRNOG00000010162	NA	NA	predicted	16.7044	microcosm
rno-miR-23b-3p	MIMAT0000793	Dnah3_predicted			NA	NA	predicted	16.7019	microcosm
rno-miR-23b-3p	MIMAT0000793	Mtfr1l	298549	ENSRNOG00000016937	NA	NA	predicted	16.6968	microcosm
rno-miR-23b-3p	MIMAT0000793	Six2	366542	ENSRNOG00000058827	NA	NA	predicted	16.6961	microcosm
rno-miR-23b-3p	MIMAT0000793	RGD1560302_predicted			NA	NA	predicted	16.6943	microcosm
rno-miR-23b-3p	MIMAT0000793	Olr906	404951	ENSRNOG00000047228	NA	NA	predicted	16.6939	microcosm
rno-miR-23b-3p	MIMAT0000793	Olr905	404951	ENSRNOG00000047228	NA	NA	predicted	16.6939	microcosm
rno-miR-23b-3p	MIMAT0000793	Cp	24268	ENSRNOG00000011913	NA	NA	predicted	16.6889	microcosm
rno-miR-23b-3p	MIMAT0000793	Inpp1	316376	ENSRNOG00000012375	NA	NA	predicted	16.6889	microcosm
rno-miR-23b-3p	MIMAT0000793	Ntel1			NA	NA	predicted	16.6889	microcosm
rno-miR-23b-3p	MIMAT0000793	LOC102551105	102551852	ENSRNOG00000040057	NA	NA	predicted	16.6883	microcosm
rno-miR-23b-3p	MIMAT0000793	RGD1309104_predicted			NA	NA	predicted	16.6882	microcosm
rno-miR-23b-3p	MIMAT0000793	Sema6a	361324	ENSRNOG00000004033	NA	NA	predicted	16.6856	microcosm
rno-miR-23b-3p	MIMAT0000793	Abca9	102553158	ENSRNOG00000004295	NA	NA	predicted	16.6853	microcosm
rno-miR-23b-3p	MIMAT0000793	Cops7a	312710	ENSRNOG00000016778	NA	NA	predicted	16.6743	microcosm
rno-miR-23b-3p	MIMAT0000793	Ercc6l2	361197	ENSRNOG00000019175	NA	NA	predicted	16.6743	microcosm
rno-miR-23b-3p	MIMAT0000793	Galnt12	313233	ENSRNOG00000008099	NA	NA	predicted	16.6743	microcosm
rno-miR-23b-3p	MIMAT0000793	Slc26a8	309646	ENSRNOG00000000512	NA	NA	predicted	16.6743	microcosm
rno-miR-23b-3p	MIMAT0000793	Olr823	405352	ENSRNOG00000013247	NA	NA	predicted	16.6743	microcosm
rno-miR-23b-3p	MIMAT0000793	Vti1b	100359512	ENSRNOG00000011734	NA	NA	predicted	16.6743	microcosm
rno-miR-23b-3p	MIMAT0000793	LOC501033	501033	ENSRNOG00000013399	NA	NA	predicted	16.6743	microcosm
rno-miR-23b-3p	MIMAT0000793	Tmem89	501056	ENSRNOG00000031141	NA	NA	predicted	16.6655	microcosm
rno-miR-23b-3p	MIMAT0000793	RGD1559938_predicted			NA	NA	predicted	16.6645	microcosm
rno-miR-23b-3p	MIMAT0000793	Zmynd10	363139	ENSRNOG00000021602	NA	NA	predicted	16.6637	microcosm
rno-miR-23b-3p	MIMAT0000793	Bcar3_predicted			NA	NA	predicted	16.6544	microcosm
rno-miR-23b-3p	MIMAT0000793	Tlr4	29260	ENSRNOG00000010522	NA	NA	predicted	16.6525	microcosm
rno-miR-23b-3p	MIMAT0000793	Slc50a1	295245	ENSRNOG00000020554	NA	NA	predicted	16.6487	microcosm
rno-miR-23b-3p	MIMAT0000793	RGD1563441	497935	ENSRNOG00000021540	NA	NA	predicted	16.6467	microcosm
rno-miR-23b-3p	MIMAT0000793	Ldha	500965	ENSRNOG00000013009	NA	NA	predicted	16.6394	microcosm
rno-miR-23b-3p	MIMAT0000793	Rps28	691531	ENSRNOG00000049442	NA	NA	predicted	16.6348	microcosm
rno-miR-23b-3p	MIMAT0000793	Ugt2b7		ENSRNOG00000028907	NA	NA	predicted	16.6336	microcosm
rno-miR-23b-3p	MIMAT0000793	Slc9a8	311651	ENSRNOG00000008354	NA	NA	predicted	16.6328	microcosm
rno-miR-23b-3p	MIMAT0000793	LOC686050			NA	NA	predicted	16.6306	microcosm
rno-miR-23b-3p	MIMAT0000793	Olr1748_predicted			NA	NA	predicted	16.6238	microcosm
rno-miR-23b-3p	MIMAT0000793	Prdx6	94167	ENSRNOG00000002896	NA	NA	predicted	16.6229	microcosm
rno-miR-23b-3p	MIMAT0000793	Ano4	299714	ENSRNOG00000006841	NA	NA	predicted	16.6224	microcosm
rno-miR-23b-3p	MIMAT0000793	LOC361325			NA	NA	predicted	16.6211	microcosm
rno-miR-23b-3p	MIMAT0000793	RGD1565990_predicted			NA	NA	predicted	16.6203	microcosm
rno-miR-23b-3p	MIMAT0000793	Agxt2	83784	ENSRNOG00000017821	NA	NA	predicted	16.6171	microcosm
rno-miR-23b-3p	MIMAT0000793	Tet1	309902	ENSRNOG00000000277	NA	NA	predicted	16.6152	microcosm
rno-miR-23b-3p	MIMAT0000793	LOC688219			NA	NA	predicted	16.6144	microcosm
rno-miR-23b-3p	MIMAT0000793	C11orf8h			NA	NA	predicted	16.6142	microcosm
rno-miR-23b-3p	MIMAT0000793	LOC690680			NA	NA	predicted	16.6113	microcosm
rno-miR-23b-3p	MIMAT0000793	Ercc6l	317252	ENSRNOG00000003208	NA	NA	predicted	16.605	microcosm
rno-miR-23b-3p	MIMAT0000793	5730460C07Rik			NA	NA	predicted	16.6049	microcosm
rno-miR-23b-3p	MIMAT0000793	LOC102547099		ENSRNOG00000009373	NA	NA	predicted	16.6002	microcosm
rno-miR-23b-3p	MIMAT0000793	Olr943	288875	ENSRNOG00000050255	NA	NA	predicted	16.5994	microcosm
rno-miR-23b-3p	MIMAT0000793	Prg4_predicted			NA	NA	predicted	16.595	microcosm
rno-miR-23b-3p	MIMAT0000793	Ptpn23	117552	ENSRNOG00000020862	NA	NA	predicted	16.59	microcosm
rno-miR-23b-3p	MIMAT0000793	Ythdc2	100909599	ENSRNOG00000039241	NA	NA	predicted	16.5754	microcosm
rno-miR-23b-3p	MIMAT0000793	Q63501_RAT			NA	NA	predicted	16.575	microcosm
rno-miR-23b-3p	MIMAT0000793	Ppp1r16a_predicted			NA	NA	predicted	16.5746	microcosm
rno-miR-23b-3p	MIMAT0000793	Gykl1	291468	ENSRNOG00000029096	NA	NA	predicted	16.5746	microcosm
rno-miR-23b-3p	MIMAT0000793	Nt5c3b	360629	ENSRNOG00000016475	NA	NA	predicted	16.5746	microcosm
rno-miR-23b-3p	MIMAT0000793	LOC100911938	100911983	ENSRNOG00000048841	NA	NA	predicted	16.5746	microcosm
rno-miR-23b-3p	MIMAT0000793	Ercc3	291703	ENSRNOG00000013180	NA	NA	predicted	16.5746	microcosm
rno-miR-23b-3p	MIMAT0000793	Atp11c_predicted			NA	NA	predicted	16.5746	microcosm
rno-miR-23b-3p	MIMAT0000793	Arsa	315222	ENSRNOG00000012953	NA	NA	predicted	16.5746	microcosm
rno-miR-23b-3p	MIMAT0000793	RGD1564164_predicted			NA	NA	predicted	16.5746	microcosm
rno-miR-23b-3p	MIMAT0000793	Sema6d_predicted			NA	NA	predicted	16.5741	microcosm
rno-miR-23b-3p	MIMAT0000793	Bsn	29138	ENSRNOG00000030714	NA	NA	predicted	16.5701	microcosm
rno-miR-23b-3p	MIMAT0000793	LOC100360124	305806	ENSRNOG00000039782	NA	NA	predicted	16.5701	microcosm
rno-miR-23b-3p	MIMAT0000793	Cilp2	306356	ENSRNOG00000020622	NA	NA	predicted	16.5701	microcosm
rno-miR-23b-3p	MIMAT0000793	LOC689343		ENSRNOG00000023905	NA	NA	predicted	16.5701	microcosm
rno-miR-23b-3p	MIMAT0000793	Vom1r5	494246	ENSRNOG00000039036	NA	NA	predicted	16.5701	microcosm
rno-miR-23b-3p	MIMAT0000793	Gpm6b	192179	ENSRNOG00000004613	NA	NA	predicted	16.5701	microcosm
rno-miR-23b-3p	MIMAT0000793	LOC305806	305806	ENSRNOG00000039782	NA	NA	predicted	16.5701	microcosm
rno-miR-23b-3p	MIMAT0000793	Nhs	317494	ENSRNOG00000030759	NA	NA	predicted	16.5701	microcosm
rno-miR-23b-3p	MIMAT0000793	Esrp2	307810	ENSRNOG00000023177	NA	NA	predicted	16.5701	microcosm
rno-miR-23b-3p	MIMAT0000793	LOC100359853	305806	ENSRNOG00000039782	NA	NA	predicted	16.5701	microcosm
rno-miR-23b-3p	MIMAT0000793	Foxp1	297480	ENSRNOG00000009184	NA	NA	predicted	16.5701	microcosm
rno-miR-23b-3p	MIMAT0000793	Kcnq4	298496	ENSRNOG00000010576	NA	NA	predicted	16.5701	microcosm
rno-miR-23b-3p	MIMAT0000793	RGD1304929	290403	ENSRNOG00000022760	NA	NA	predicted	16.5684	microcosm
rno-miR-23b-3p	MIMAT0000793	Sfmbt2	307106	ENSRNOG00000029235	NA	NA	predicted	16.5675	microcosm
rno-miR-23b-3p	MIMAT0000793	Fah	29383	ENSRNOG00000013223	NA	NA	predicted	16.5654	microcosm
rno-miR-23b-3p	MIMAT0000793	Iqcb1_predicted			NA	NA	predicted	16.5558	microcosm
rno-miR-23b-3p	MIMAT0000793	Gsta5	494499	ENSRNOG00000000201	NA	NA	predicted	16.555	microcosm
rno-miR-23b-3p	MIMAT0000793	Mylk3	291926	ENSRNOG00000017546	NA	NA	predicted	16.5544	microcosm
rno-miR-23b-3p	MIMAT0000793	RGD1565455		ENSRNOG00000023436	NA	NA	predicted	16.5531	microcosm
rno-miR-23b-3p	MIMAT0000793	Rgl2	294283	ENSRNOG00000000474	NA	NA	predicted	16.5506	microcosm
rno-miR-23b-3p	MIMAT0000793	Qrfpr	310327	ENSRNOG00000014414	NA	NA	predicted	16.5492	microcosm
rno-miR-23b-3p	MIMAT0000793	Svip	499157	ENSRNOG00000037137	NA	NA	predicted	16.5417	microcosm
rno-miR-23b-3p	MIMAT0000793	Olr520_predicted			NA	NA	predicted	16.5388	microcosm
rno-miR-23b-3p	MIMAT0000793	LOC683577			NA	NA	predicted	16.5362	microcosm
rno-miR-23b-3p	MIMAT0000793	RGD1565806_predicted			NA	NA	predicted	16.5311	microcosm
rno-miR-23b-3p	MIMAT0000793	Zmym2	305913	ENSRNOG00000008734	NA	NA	predicted	16.52	microcosm
rno-miR-23b-3p	MIMAT0000793	Efna5	116683	ENSRNOG00000034177	NA	NA	predicted	16.5186	microcosm
rno-miR-23b-3p	MIMAT0000793	Prok2	192206	ENSRNOG00000010898	NA	NA	predicted	16.5159	microcosm
rno-miR-23b-3p	MIMAT0000793	Utp3	305258	ENSRNOG00000003599	NA	NA	predicted	16.5107	microcosm
rno-miR-23b-3p	MIMAT0000793	Ccdc83	100912860	ENSRNOG00000022808	NA	NA	predicted	16.4997	microcosm
rno-miR-23b-3p	MIMAT0000793	RGD1306091		ENSRNOG00000019931	NA	NA	predicted	16.4943	microcosm
rno-miR-23b-3p	MIMAT0000793	RGD1306271	312246	ENSRNOG00000013729	NA	NA	predicted	16.4943	microcosm
rno-miR-23b-3p	MIMAT0000793	Parp9	303905	ENSRNOG00000023463	NA	NA	predicted	16.4919	microcosm
rno-miR-23b-3p	MIMAT0000793	RGD1561694	498388	ENSRNOG00000029107	NA	NA	predicted	16.4887	microcosm
rno-miR-23b-3p	MIMAT0000793	Nsun6	307148	ENSRNOG00000018520	NA	NA	predicted	16.4881	microcosm
rno-miR-23b-3p	MIMAT0000793	Olr96	405910	ENSRNOG00000015832	NA	NA	predicted	16.4881	microcosm
rno-miR-23b-3p	MIMAT0000793	RGD1559633_predicted			NA	NA	predicted	16.4881	microcosm
rno-miR-23b-3p	MIMAT0000793	Amotl2	65157	ENSRNOG00000008487	NA	NA	predicted	16.4856	microcosm
rno-miR-23b-3p	MIMAT0000793	Olr1514	287514	ENSRNOG00000033267	NA	NA	predicted	16.4856	microcosm
rno-miR-23b-3p	MIMAT0000793	Olr379	293812	ENSRNOG00000023530	NA	NA	predicted	16.481	microcosm
rno-miR-23b-3p	MIMAT0000793	Zbtb34	689174	ENSRNOG00000032700	NA	NA	predicted	16.4784	microcosm
rno-miR-23b-3p	MIMAT0000793	RGD1559962_predicted			NA	NA	predicted	16.4709	microcosm
rno-miR-23b-3p	MIMAT0000793	LOC691286	691286	ENSRNOG00000002845	NA	NA	predicted	16.4659	microcosm
rno-miR-23b-3p	MIMAT0000793	LOC100910858	404841	ENSRNOG00000050271	NA	NA	predicted	16.4659	microcosm
rno-miR-23b-3p	MIMAT0000793	XR_007251.1			NA	NA	predicted	16.4659	microcosm
rno-miR-23b-3p	MIMAT0000793	Olr623	100910556	ENSRNOG00000050271	NA	NA	predicted	16.4659	microcosm
rno-miR-23b-3p	MIMAT0000793	Olr639	100910858	ENSRNOG00000050271	NA	NA	predicted	16.4659	microcosm
rno-miR-23b-3p	MIMAT0000793	Pmaip1	492821	ENSRNOG00000018770	NA	NA	predicted	16.4659	microcosm
rno-miR-23b-3p	MIMAT0000793	ENSMUSG00000075442			NA	NA	predicted	16.4659	microcosm
rno-miR-23b-3p	MIMAT0000793	LOC100910556	404841	ENSRNOG00000050271	NA	NA	predicted	16.4659	microcosm
rno-miR-23b-3p	MIMAT0000793	Zfp384	171018	ENSRNOG00000017066	NA	NA	predicted	16.4659	microcosm
rno-miR-23b-3p	MIMAT0000793	Vps33a			NA	NA	predicted	16.4659	microcosm
rno-miR-23b-3p	MIMAT0000793	Olr1437_predicted			NA	NA	predicted	16.4659	microcosm
rno-miR-23b-3p	MIMAT0000793	RGD1359435			NA	NA	predicted	16.4659	microcosm
rno-miR-23b-3p	MIMAT0000793	Olr588	295822	ENSRNOG00000005793	NA	NA	predicted	16.4659	microcosm
rno-miR-23b-3p	MIMAT0000793	Synrg		ENSRNOG00000000242	NA	NA	predicted	16.4659	microcosm
rno-miR-23b-3p	MIMAT0000793	Tmem184b	362959	ENSRNOG00000022802	NA	NA	predicted	16.4659	microcosm
rno-miR-23b-3p	MIMAT0000793	Serpinb1a	291091	ENSRNOG00000016581	NA	NA	predicted	16.4659	microcosm
rno-miR-23b-3p	MIMAT0000793	Ccr4	171054	ENSRNOG00000010315	NA	NA	predicted	16.4659	microcosm
rno-miR-23b-3p	MIMAT0000793	LOC680200	680200	ENSRNOG00000042308	NA	NA	predicted	16.4659	microcosm
rno-miR-23b-3p	MIMAT0000793	2410024A21Rik			NA	NA	predicted	16.4659	microcosm
rno-miR-23b-3p	MIMAT0000793	Gtf2a1	83830	ENSRNOG00000004300	NA	NA	predicted	16.4659	microcosm
rno-miR-23b-3p	MIMAT0000793	Ctla2a	498690	ENSRNOG00000039971	NA	NA	predicted	16.4603	microcosm
rno-miR-23b-3p	MIMAT0000793	Ggh	25455	ENSRNOG00000007351	NA	NA	predicted	16.4603	microcosm
rno-miR-23b-3p	MIMAT0000793	Ddx50	361848	ENSRNOG00000000396	NA	NA	predicted	16.4603	microcosm
rno-miR-23b-3p	MIMAT0000793	Ngfrap1	117089	ENSRNOG00000028822	NA	NA	predicted	16.4603	microcosm
rno-miR-23b-3p	MIMAT0000793	Pygm	24701	ENSRNOG00000021090	NA	NA	predicted	16.4603	microcosm
rno-miR-23b-3p	MIMAT0000793	Barhl2	65050	ENSRNOG00000002117	NA	NA	predicted	16.4603	microcosm
rno-miR-23b-3p	MIMAT0000793	Cyb561d2	363137	ENSRNOG00000021887	NA	NA	predicted	16.4603	microcosm
rno-miR-23b-3p	MIMAT0000793	Mccc1	294972	ENSRNOG00000013293	NA	NA	predicted	16.4603	microcosm
rno-miR-23b-3p	MIMAT0000793	Lsm3	297455	ENSRNOG00000008733	NA	NA	predicted	16.4603	microcosm
rno-miR-23b-3p	MIMAT0000793	Rap2b	170923	ENSRNOG00000014420	NA	NA	predicted	16.4551	microcosm
rno-miR-23b-3p	MIMAT0000793	Cyp2j4	65210	ENSRNOG00000031004	NA	NA	predicted	16.4533	microcosm
rno-miR-23b-3p	MIMAT0000793	LOC690303			NA	NA	predicted	16.449	microcosm
rno-miR-23b-3p	MIMAT0000793	Slc20a1	81826	ENSRNOG00000018567	NA	NA	predicted	16.4428	microcosm
rno-miR-23b-3p	MIMAT0000793	Xrcc4	309995	ENSRNOG00000029966	NA	NA	predicted	16.4352	microcosm
rno-miR-23b-3p	MIMAT0000793	Pkp4	295625	ENSRNOG00000005504	NA	NA	predicted	16.4316	microcosm
rno-miR-23b-3p	MIMAT0000793	LOC300173			NA	NA	predicted	16.4257	microcosm
rno-miR-23b-3p	MIMAT0000793	Kif20b	309523	ENSRNOG00000018929	NA	NA	predicted	16.4243	microcosm
rno-miR-23b-3p	MIMAT0000793	Fem1b	315745	ENSRNOG00000007077	NA	NA	predicted	16.4198	microcosm
rno-miR-23b-3p	MIMAT0000793	Lhx9	289048	ENSRNOG00000010357	NA	NA	predicted	16.4189	microcosm
rno-miR-23b-3p	MIMAT0000793	Acvr2b	25366	ENSRNOG00000014477	NA	NA	predicted	16.4188	microcosm
rno-miR-23b-3p	MIMAT0000793	Cuzd1	117179	ENSRNOG00000029945	NA	NA	predicted	16.4099	microcosm
rno-miR-23b-3p	MIMAT0000793	Toe1_predicted			NA	NA	predicted	16.4087	microcosm
rno-miR-23b-3p	MIMAT0000793	MGC108785			NA	NA	predicted	16.4062	microcosm
rno-miR-23b-3p	MIMAT0000793	RGD1563550_predicted			NA	NA	predicted	16.4012	microcosm
rno-miR-23b-3p	MIMAT0000793	Olr631	295848	ENSRNOG00000032712	NA	NA	predicted	16.4012	microcosm
rno-miR-23b-3p	MIMAT0000793	Ly9_predicted			NA	NA	predicted	16.3973	microcosm
rno-miR-23b-3p	MIMAT0000793	Fam110c	500638	ENSRNOG00000005660	NA	NA	predicted	16.3935	microcosm
rno-miR-23b-3p	MIMAT0000793	Ubap2	313169	ENSRNOG00000052087	NA	NA	predicted	16.3895	microcosm
rno-miR-23b-3p	MIMAT0000793	Ostm1	499474	ENSRNOG00000037647	NA	NA	predicted	16.3883	microcosm
rno-miR-23b-3p	MIMAT0000793	LOC691125			NA	NA	predicted	16.3849	microcosm
rno-miR-23b-3p	MIMAT0000793	Plk3	58936	ENSRNOG00000018484	NA	NA	predicted	16.3848	microcosm
rno-miR-23b-3p	MIMAT0000793	RGD1560633_predicted			NA	NA	predicted	16.3838	microcosm
rno-miR-23b-3p	MIMAT0000793	Mfhas1	306508	ENSRNOG00000011431	NA	NA	predicted	16.3838	microcosm
rno-miR-23b-3p	MIMAT0000793	V1rc18			NA	NA	predicted	16.3813	microcosm
rno-miR-23b-3p	MIMAT0000793	Zfp383	100362119	ENSRNOG00000020774	NA	NA	predicted	16.3792	microcosm
rno-miR-23b-3p	MIMAT0000793	Sumo1	301442	ENSRNOG00000016133	NA	NA	predicted	16.3761	microcosm
rno-miR-23b-3p	MIMAT0000793	Vgll3	498038	ENSRNOG00000028774	NA	NA	predicted	16.3719	microcosm
rno-miR-23b-3p	MIMAT0000793	Cgnl1	315795	ENSRNOG00000054080	NA	NA	predicted	16.3641	microcosm
rno-miR-23b-3p	MIMAT0000793	Cts8	680718	ENSRNOG00000040000	NA	NA	predicted	16.363	microcosm
rno-miR-23b-3p	MIMAT0000793	Fer1l5		ENSRNOG00000024201	NA	NA	predicted	16.3617	microcosm
rno-miR-23b-3p	MIMAT0000793	RGD1561759_predicted			NA	NA	predicted	16.3617	microcosm
rno-miR-23b-3p	MIMAT0000793	Aox1	54349	ENSRNOG00000015354	NA	NA	predicted	16.3617	microcosm
rno-miR-23b-3p	MIMAT0000793	LOC100910792	60668	ENSRNOG00000012490	NA	NA	predicted	16.3617	microcosm
rno-miR-23b-3p	MIMAT0000793	Amph	60668	ENSRNOG00000012490	NA	NA	predicted	16.3617	microcosm
rno-miR-23b-3p	MIMAT0000793	Eya1		ENSRNOG00000007590	NA	NA	predicted	16.3617	microcosm
rno-miR-23b-3p	MIMAT0000793	Mfn1	192647	ENSRNOG00000011057	NA	NA	predicted	16.3617	microcosm
rno-miR-23b-3p	MIMAT0000793	LOC100909679	60668	ENSRNOG00000012490	NA	NA	predicted	16.3617	microcosm
rno-miR-23b-3p	MIMAT0000793	LOC100362601		ENSRNOG00000028909	NA	NA	predicted	16.3617	microcosm
rno-miR-23b-3p	MIMAT0000793	Dlgh2			NA	NA	predicted	16.3617	microcosm
rno-miR-23b-3p	MIMAT0000793	LOC680258			NA	NA	predicted	16.3617	microcosm
rno-miR-23b-3p	MIMAT0000793	Q3MIE3_RAT			NA	NA	predicted	16.3617	microcosm
rno-miR-23b-3p	MIMAT0000793	Brca1	497672	ENSRNOG00000020701	NA	NA	predicted	16.3617	microcosm
rno-miR-23b-3p	MIMAT0000793	Serpina9_predicted			NA	NA	predicted	16.3617	microcosm
rno-miR-23b-3p	MIMAT0000793	RGD1565456_predicted			NA	NA	predicted	16.3617	microcosm
rno-miR-23b-3p	MIMAT0000793	RGD1559493	500516	ENSRNOG00000030914	NA	NA	predicted	16.3617	microcosm
rno-miR-23b-3p	MIMAT0000793	Kras	24525	ENSRNOG00000009338	NA	NA	predicted	16.3617	microcosm
rno-miR-23b-3p	MIMAT0000793	Olr951_predicted			NA	NA	predicted	16.3617	microcosm
rno-miR-23b-3p	MIMAT0000793	Frem1	298185	ENSRNOG00000022309	NA	NA	predicted	16.3617	microcosm
rno-miR-23b-3p	MIMAT0000793	F7	260320	ENSRNOG00000032737	NA	NA	predicted	16.3617	microcosm
rno-miR-23b-3p	MIMAT0000793	RGD1564852_predicted			NA	NA	predicted	16.3617	microcosm
rno-miR-23b-3p	MIMAT0000793	Q8CIS8_RAT			NA	NA	predicted	16.3617	microcosm
rno-miR-23b-3p	MIMAT0000793	Olr672	295878	ENSRNOG00000029153	NA	NA	predicted	16.3526	microcosm
rno-miR-23b-3p	MIMAT0000793	Col4a5_predicted			NA	NA	predicted	16.3526	microcosm
rno-miR-23b-3p	MIMAT0000793	RGD1561928		ENSRNOG00000031879	NA	NA	predicted	16.3463	microcosm
rno-miR-23b-3p	MIMAT0000793	Vps26			NA	NA	predicted	16.346	microcosm
rno-miR-23b-3p	MIMAT0000793	Eif3h	299899	ENSRNOG00000004252	NA	NA	predicted	16.346	microcosm
rno-miR-23b-3p	MIMAT0000793	LOC100911110	299899	ENSRNOG00000004252	NA	NA	predicted	16.346	microcosm
rno-miR-23b-3p	MIMAT0000793	Sufu	361769	ENSRNOG00000019807	NA	NA	predicted	16.346	microcosm
rno-miR-23b-3p	MIMAT0000793	Usp45	313098	ENSRNOG00000008688	NA	NA	predicted	16.346	microcosm
rno-miR-23b-3p	MIMAT0000793	Scnm1	310662	ENSRNOG00000021092	NA	NA	predicted	16.346	microcosm
rno-miR-23b-3p	MIMAT0000793	Phf5a	192246	ENSRNOG00000024170	NA	NA	predicted	16.3402	microcosm
rno-miR-23b-3p	MIMAT0000793	Fcrla	304965	ENSRNOG00000003136	NA	NA	predicted	16.332	microcosm
rno-miR-23b-3p	MIMAT0000793	Mcoln2	292168	ENSRNOG00000015089	NA	NA	predicted	16.3304	microcosm
rno-miR-23b-3p	MIMAT0000793	RGD1564827	498689	ENSRNOG00000017806	NA	NA	predicted	16.3218	microcosm
rno-miR-23b-3p	MIMAT0000793	Olr5_predicted			NA	NA	predicted	16.3193	microcosm
rno-miR-23b-3p	MIMAT0000793	Mageb4	317271	ENSRNOG00000022806	NA	NA	predicted	16.3193	microcosm
rno-miR-23b-3p	MIMAT0000793	LOC499602	499602	ENSRNOG00000013692	NA	NA	predicted	16.279	microcosm
rno-miR-23b-3p	MIMAT0000793	Crsp3			NA	NA	predicted	16.2769	microcosm
rno-miR-23b-3p	MIMAT0000793	Olr1664	405375	ENSRNOG00000033684	NA	NA	predicted	16.2769	microcosm
rno-miR-23b-3p	MIMAT0000793	Lgmn	63865	ENSRNOG00000007089	NA	NA	predicted	16.2756	microcosm
rno-miR-23b-3p	MIMAT0000793	Prph2	25534	ENSRNOG00000033159	NA	NA	predicted	16.2574	microcosm
rno-miR-23b-3p	MIMAT0000793	Eml4_predicted			NA	NA	predicted	16.2574	microcosm
rno-miR-23b-3p	MIMAT0000793	Rds			NA	NA	predicted	16.2574	microcosm
rno-miR-23b-3p	MIMAT0000793	Arhgap5	299012	ENSRNOG00000004696	NA	NA	predicted	16.2574	microcosm
rno-miR-23b-3p	MIMAT0000793	Ryr3	170546	ENSRNOG00000006645	NA	NA	predicted	16.2574	microcosm
rno-miR-23b-3p	MIMAT0000793	Prr9	100361314	ENSRNOG00000012312	NA	NA	predicted	16.2574	microcosm
rno-miR-23b-3p	MIMAT0000793	Tmprss11f	498345	ENSRNOG00000002005	NA	NA	predicted	16.2574	microcosm
rno-miR-23b-3p	MIMAT0000793	Cdh26_predicted			NA	NA	predicted	16.2574	microcosm
rno-miR-23b-3p	MIMAT0000793	Moxd2	500092	ENSRNOG00000012916	NA	NA	predicted	16.2574	microcosm
rno-miR-23b-3p	MIMAT0000793	Cand1	117152	ENSRNOG00000007834	NA	NA	predicted	16.2498	microcosm
rno-miR-23b-3p	MIMAT0000793	Dus2	291978	ENSRNOG00000019819	NA	NA	predicted	16.2437	microcosm
rno-miR-23b-3p	MIMAT0000793	Galt	298003	ENSRNOG00000014766	NA	NA	predicted	16.2317	microcosm
rno-miR-23b-3p	MIMAT0000793	Lrrc47	362672	ENSRNOG00000024796	NA	NA	predicted	16.2317	microcosm
rno-miR-23b-3p	MIMAT0000793	Rmi1	306734	ENSRNOG00000019108	NA	NA	predicted	16.2317	microcosm
rno-miR-23b-3p	MIMAT0000793	Vps28	300052	ENSRNOG00000014633	NA	NA	predicted	16.2317	microcosm
rno-miR-23b-3p	MIMAT0000793	Dexi	497857	ENSRNOG00000002635	NA	NA	predicted	16.2169	microcosm
rno-miR-23b-3p	MIMAT0000793	Ctnna3		ENSRNOG00000000378	NA	NA	predicted	16.2097	microcosm
rno-miR-23b-3p	MIMAT0000793	Dnhd1	690115	ENSRNOG00000051291	NA	NA	predicted	16.2003	microcosm
rno-miR-23b-3p	MIMAT0000793	Ptprn	116660	ENSRNOG00000019587	NA	NA	predicted	16.1967	microcosm
rno-miR-23b-3p	MIMAT0000793	Paqr9	315904	ENSRNOG00000032374	NA	NA	predicted	16.1923	microcosm
rno-miR-23b-3p	MIMAT0000793	Vamp5	89818	ENSRNOG00000012659	NA	NA	predicted	16.1909	microcosm
rno-miR-23b-3p	MIMAT0000793	Dcn	29139	ENSRNOG00000004554	NA	NA	predicted	16.188	microcosm
rno-miR-23b-3p	MIMAT0000793	LOC498369	303554	ENSRNOG00000020730	NA	NA	predicted	16.1875	microcosm
rno-miR-23b-3p	MIMAT0000793	RGD1559697_predicted			NA	NA	predicted	16.1872	microcosm
rno-miR-23b-3p	MIMAT0000793	LOC102555672	102555672	ENSRNOG00000014380	NA	NA	predicted	16.1844	microcosm
rno-miR-23b-3p	MIMAT0000793	Zfp788	102555672	ENSRNOG00000014380	NA	NA	predicted	16.1844	microcosm
rno-miR-23b-3p	MIMAT0000793	LOC684261			NA	NA	predicted	16.1824	microcosm
rno-miR-23b-3p	MIMAT0000793	Kmt2d	100362634	ENSRNOG00000015107	NA	NA	predicted	16.1818	microcosm
rno-miR-23b-3p	MIMAT0000793	Myo1e	25484	ENSRNOG00000011886	NA	NA	predicted	16.1775	microcosm
rno-miR-23b-3p	MIMAT0000793	Tlcd2	497955	ENSRNOG00000037275	NA	NA	predicted	16.1725	microcosm
rno-miR-23b-3p	MIMAT0000793	RGD1311730_predicted			NA	NA	predicted	16.1712	microcosm
rno-miR-23b-3p	MIMAT0000793	Slc9a3r1	59114	ENSRNOG00000003232	NA	NA	predicted	16.165	microcosm
rno-miR-23b-3p	MIMAT0000793	Mcm3ap_predicted			NA	NA	predicted	16.1558	microcosm
rno-miR-23b-3p	MIMAT0000793	Zfp53_predicted			NA	NA	predicted	16.1532	microcosm
rno-miR-23b-3p	MIMAT0000793	Chd2_predicted			NA	NA	predicted	16.1532	microcosm
rno-miR-23b-3p	MIMAT0000793	Htr1b	25075	ENSRNOG00000013042	NA	NA	predicted	16.1532	microcosm
rno-miR-23b-3p	MIMAT0000793	Olr245	293390	ENSRNOG00000030215	NA	NA	predicted	16.1532	microcosm
rno-miR-23b-3p	MIMAT0000793	Olr1356	302954	ENSRNOG00000039773	NA	NA	predicted	16.1532	microcosm
rno-miR-23b-3p	MIMAT0000793	Crnn	295186	ENSRNOG00000008721	NA	NA	predicted	16.1532	microcosm
rno-miR-23b-3p	MIMAT0000793	Gpx7	298376	ENSRNOG00000009751	NA	NA	predicted	16.1532	microcosm
rno-miR-23b-3p	MIMAT0000793	Zfp54	308232	ENSRNOG00000051578	NA	NA	predicted	16.1532	microcosm
rno-miR-23b-3p	MIMAT0000793	Ice2	691379	ENSRNOG00000010160	NA	NA	predicted	16.1532	microcosm
rno-miR-23b-3p	MIMAT0000793	Zfp488	290571	ENSRNOG00000057542	NA	NA	predicted	16.1532	microcosm
rno-miR-23b-3p	MIMAT0000793	Msl3l2	309790	ENSRNOG00000000801	NA	NA	predicted	16.1532	microcosm
rno-miR-23b-3p	MIMAT0000793	Igsf6	171064	ENSRNOG00000017277	NA	NA	predicted	16.142	microcosm
rno-miR-23b-3p	MIMAT0000793	Gdap1l1	311616	ENSRNOG00000008790	NA	NA	predicted	16.1413	microcosm
rno-miR-23b-3p	MIMAT0000793	Notch3	56761	ENSRNOG00000004346	NA	NA	predicted	16.1174	microcosm
rno-miR-23b-3p	MIMAT0000793	Btg4	315650	ENSRNOG00000011277	NA	NA	predicted	16.1174	microcosm
rno-miR-23b-3p	MIMAT0000793	Smg8	287596	ENSRNOG00000005769	NA	NA	predicted	16.1174	microcosm
rno-miR-23b-3p	MIMAT0000793	Nek6	360161	ENSRNOG00000010897	NA	NA	predicted	16.1105	microcosm
rno-miR-23b-3p	MIMAT0000793	Trrap		ENSRNOG00000025244	NA	NA	predicted	16.1101	microcosm
rno-miR-23b-3p	MIMAT0000793	Serpini1	116459	ENSRNOG00000010248	NA	NA	predicted	16.0952	microcosm
rno-miR-23b-3p	MIMAT0000793	Senp6_predicted			NA	NA	predicted	16.0935	microcosm
rno-miR-23b-3p	MIMAT0000793	Uck1	311864	ENSRNOG00000011467	NA	NA	predicted	16.0902	microcosm
rno-miR-23b-3p	MIMAT0000793	Gpr142	501735	ENSRNOG00000024446	NA	NA	predicted	16.0888	microcosm
rno-miR-23b-3p	MIMAT0000793	Abcf3	287982	ENSRNOG00000001710	NA	NA	predicted	16.087	microcosm
rno-miR-23b-3p	MIMAT0000793	Galk2	296117	ENSRNOG00000009289	NA	NA	predicted	16.0846	microcosm
rno-miR-23b-3p	MIMAT0000793	Il3	24495	ENSRNOG00000026786	NA	NA	predicted	16.0767	microcosm
rno-miR-23b-3p	MIMAT0000793	Papss2	294103	ENSRNOG00000011068	NA	NA	predicted	16.0628	microcosm
rno-miR-23b-3p	MIMAT0000793	LOC689435		ENSRNOG00000048581	NA	NA	predicted	16.0572	microcosm
rno-miR-23b-3p	MIMAT0000793	LOC102555377	102555377	ENSRNOG00000026569	NA	NA	predicted	16.049	microcosm
rno-miR-23b-3p	MIMAT0000793	Zfp87		ENSRNOG00000016462	NA	NA	predicted	16.049	microcosm
rno-miR-23b-3p	MIMAT0000793	Atoh8	500200	ENSRNOG00000010716	NA	NA	predicted	16.049	microcosm
rno-miR-23b-3p	MIMAT0000793	Abcb7	302395	ENSRNOG00000002790	NA	NA	predicted	16.049	microcosm
rno-miR-23b-3p	MIMAT0000793	Rgs7	54296	ENSRNOG00000021984	NA	NA	predicted	16.049	microcosm
rno-miR-23b-3p	MIMAT0000793	Cd47	29364	ENSRNOG00000001964	NA	NA	predicted	16.049	microcosm
rno-miR-23b-3p	MIMAT0000793	Olr45	293192	ENSRNOG00000018508	NA	NA	predicted	16.049	microcosm
rno-miR-23b-3p	MIMAT0000793	Emilin3	362262	ENSRNOG00000016734	NA	NA	predicted	16.049	microcosm
rno-miR-23b-3p	MIMAT0000793	Erich4	685046	ENSRNOG00000037798	NA	NA	predicted	16.049	microcosm
rno-miR-23b-3p	MIMAT0000793	RGD1566248	102555377	ENSRNOG00000026569	NA	NA	predicted	16.049	microcosm
rno-miR-23b-3p	MIMAT0000793	Zfp717	102548226	ENSRNOG00000014331	NA	NA	predicted	16.049	microcosm
rno-miR-23b-3p	MIMAT0000793	Brwd1	304061	ENSRNOG00000001632	NA	NA	predicted	16.049	microcosm
rno-miR-23b-3p	MIMAT0000793	Bspry	64027	ENSRNOG00000015105	NA	NA	predicted	16.049	microcosm
rno-miR-23b-3p	MIMAT0000793	Iqgap2	100360623	ENSRNOG00000025406	NA	NA	predicted	16.049	microcosm
rno-miR-23b-3p	MIMAT0000793	4930481F22Rik			NA	NA	predicted	16.0457	microcosm
rno-miR-23b-3p	MIMAT0000793	Pank4	171053	ENSRNOG00000014044	NA	NA	predicted	16.033	microcosm
rno-miR-23b-3p	MIMAT0000793	Plekha3	295674	ENSRNOG00000011830	NA	NA	predicted	16.0177	microcosm
rno-miR-23b-3p	MIMAT0000793	RGD1565560	289701	ENSRNOG00000005022	NA	NA	predicted	16.0144	microcosm
rno-miR-23b-3p	MIMAT0000793	Rap1gds1_predicted			NA	NA	predicted	16.0084	microcosm
rno-miR-23b-3p	MIMAT0000793	RGD1305469_predicted			NA	NA	predicted	16.0079	microcosm
rno-miR-23b-3p	MIMAT0000793	RGD1563222	362175	ENSRNOG00000010963	NA	NA	predicted	16.0031	microcosm
rno-miR-23b-3p	MIMAT0000793	Fbp2	114508	ENSRNOG00000017637	NA	NA	predicted	16.0031	microcosm
rno-miR-23b-3p	MIMAT0000793	Mrpl49	309176	ENSRNOG00000020975	NA	NA	predicted	16.0031	microcosm
rno-miR-23b-3p	MIMAT0000793	Mxd1	362391	ENSRNOG00000017720	NA	NA	predicted	16.0031	microcosm
rno-miR-23b-3p	MIMAT0000793	Smco4	363020	ENSRNOG00000011162	NA	NA	predicted	15.9994	microcosm
rno-miR-23b-3p	MIMAT0000793	Ncstn	289231	ENSRNOG00000005355	NA	NA	predicted	15.9899	microcosm
rno-miR-23b-3p	MIMAT0000793	Il23r	689932	ENSRNOG00000007544	NA	NA	predicted	15.9858	microcosm
rno-miR-23b-3p	MIMAT0000793	Isgf3g			NA	NA	predicted	15.9827	microcosm
rno-miR-23b-3p	MIMAT0000793	Amotl1	315430	ENSRNOG00000008990	NA	NA	predicted	15.9794	microcosm
rno-miR-23b-3p	MIMAT0000793	Gemin6	362688	ENSRNOG00000027332	NA	NA	predicted	15.9776	microcosm
rno-miR-23b-3p	MIMAT0000793	Eif2b3	171145	ENSRNOG00000018375	NA	NA	predicted	15.9765	microcosm
rno-miR-23b-3p	MIMAT0000793	Sar1b	287276	ENSRNOG00000004820	NA	NA	predicted	15.9757	microcosm
rno-miR-23b-3p	MIMAT0000793	Fgf12	170630	ENSRNOG00000001931	NA	NA	predicted	15.9716	microcosm
rno-miR-23b-3p	MIMAT0000793	Itga1	25118	ENSRNOG00000012080	NA	NA	predicted	15.9687	microcosm
rno-miR-23b-3p	MIMAT0000793	LOC102553078	100360647	ENSRNOG00000020982	NA	NA	predicted	15.9448	microcosm
rno-miR-23b-3p	MIMAT0000793	Fau	102548890	ENSRNOG00000020982	NA	NA	predicted	15.9448	microcosm
rno-miR-23b-3p	MIMAT0000793	LOC100360647	102553078	ENSRNOG00000020982	NA	NA	predicted	15.9448	microcosm
rno-miR-23b-3p	MIMAT0000793	Greb1	500633	ENSRNOG00000024651	NA	NA	predicted	15.9448	microcosm
rno-miR-23b-3p	MIMAT0000793	LOC498222	498222	ENSRNOG00000004341	NA	NA	predicted	15.9448	microcosm
rno-miR-23b-3p	MIMAT0000793	Sh2d4b	290612	ENSRNOG00000042623	NA	NA	predicted	15.9448	microcosm
rno-miR-23b-3p	MIMAT0000793	Tm6sf1_predicted			NA	NA	predicted	15.9448	microcosm
rno-miR-23b-3p	MIMAT0000793	Prss36	497040	ENSRNOG00000033343	NA	NA	predicted	15.9448	microcosm
rno-miR-23b-3p	MIMAT0000793	Pcdhb2	498843	ENSRNOG00000039476	NA	NA	predicted	15.9448	microcosm
rno-miR-23b-3p	MIMAT0000793	RGD1562376_predicted			NA	NA	predicted	15.9448	microcosm
rno-miR-23b-3p	MIMAT0000793	Khdc1c	689090	ENSRNOG00000028595	NA	NA	predicted	15.9448	microcosm
rno-miR-23b-3p	MIMAT0000793	Sac3d1		ENSRNOG00000021003	NA	NA	predicted	15.9448	microcosm
rno-miR-23b-3p	MIMAT0000793	Olr125	405004	ENSRNOG00000016027	NA	NA	predicted	15.9434	microcosm
rno-miR-23b-3p	MIMAT0000793	Olr1622	405127	ENSRNOG00000008804	NA	NA	predicted	15.9407	microcosm
rno-miR-23b-3p	MIMAT0000793	LOC681006	681006	ENSRNOG00000025953	NA	NA	predicted	15.9358	microcosm
rno-miR-23b-3p	MIMAT0000793	Sh2d2a	310688	ENSRNOG00000013294	NA	NA	predicted	15.9231	microcosm
rno-miR-23b-3p	MIMAT0000793	Ciao1	29231	ENSRNOG00000012638	NA	NA	predicted	15.9166	microcosm
rno-miR-23b-3p	MIMAT0000793	Fam217a	498735	ENSRNOG00000016672	NA	NA	predicted	15.9157	microcosm
rno-miR-23b-3p	MIMAT0000793	Hspa4l	294993	ENSRNOG00000010819	NA	NA	predicted	15.9135	microcosm
rno-miR-23b-3p	MIMAT0000793	Spata25	499943	ENSRNOG00000015744	NA	NA	predicted	15.9104	microcosm
rno-miR-23b-3p	MIMAT0000793	Snx20	307742	ENSRNOG00000014202	NA	NA	predicted	15.8972	microcosm
rno-miR-23b-3p	MIMAT0000793	Manf	315989	ENSRNOG00000014201	NA	NA	predicted	15.8888	microcosm
rno-miR-23b-3p	MIMAT0000793	Cep72	308064	ENSRNOG00000015465	NA	NA	predicted	15.8888	microcosm
rno-miR-23b-3p	MIMAT0000793	Unc5b	60630	ENSRNOG00000000567	NA	NA	predicted	15.8874	microcosm
rno-miR-23b-3p	MIMAT0000793	Aldh9a1	64040	ENSRNOG00000004027	NA	NA	predicted	15.8785	microcosm
rno-miR-23b-3p	MIMAT0000793	Lbr		ENSRNOG00000003103	NA	NA	predicted	15.8769	microcosm
rno-miR-23b-3p	MIMAT0000793	Fbxo32	171043	ENSRNOG00000006738	NA	NA	predicted	15.8764	microcosm
rno-miR-23b-3p	MIMAT0000793	LOC498411			NA	NA	predicted	15.8762	microcosm
rno-miR-23b-3p	MIMAT0000793	Apoc4	680551	ENSRNOG00000018405	NA	NA	predicted	15.8717	microcosm
rno-miR-23b-3p	MIMAT0000793	Fam124a	691938	ENSRNOG00000009802	NA	NA	predicted	15.862	microcosm
rno-miR-23b-3p	MIMAT0000793	Tmed3	300888	ENSRNOG00000013889	NA	NA	predicted	15.8619	microcosm
rno-miR-23b-3p	MIMAT0000793	Rogdi	287061	ENSRNOG00000003125	NA	NA	predicted	15.8524	microcosm
rno-miR-23b-3p	MIMAT0000793	Ncoa1_predicted			NA	NA	predicted	15.8469	microcosm
rno-miR-23b-3p	MIMAT0000793	Gpr174	302373	ENSRNOG00000032970	NA	NA	predicted	15.8406	microcosm
rno-miR-23b-3p	MIMAT0000793	Psma1	29668	ENSRNOG00000011745	NA	NA	predicted	15.8406	microcosm
rno-miR-23b-3p	MIMAT0000793	Fiz1	292584	ENSRNOG00000016574	NA	NA	predicted	15.8406	microcosm
rno-miR-23b-3p	MIMAT0000793	RGD1560836_predicted			NA	NA	predicted	15.8406	microcosm
rno-miR-23b-3p	MIMAT0000793	Ankrd34c	300889	ENSRNOG00000013937	NA	NA	predicted	15.8406	microcosm
rno-miR-23b-3p	MIMAT0000793	Fbxo4	310363	ENSRNOG00000015622	NA	NA	predicted	15.8406	microcosm
rno-miR-23b-3p	MIMAT0000793	Rab32	365042	ENSRNOG00000014258	NA	NA	predicted	15.8406	microcosm
rno-miR-23b-3p	MIMAT0000793	Olr114	405297	ENSRNOG00000048293	NA	NA	predicted	15.8406	microcosm
rno-miR-23b-3p	MIMAT0000793	Snx22	300796	ENSRNOG00000022852	NA	NA	predicted	15.8406	microcosm
rno-miR-23b-3p	MIMAT0000793	Fam3a	501664	ENSRNOG00000060623	NA	NA	predicted	15.8406	microcosm
rno-miR-23b-3p	MIMAT0000793	Olr758	296010	ENSRNOG00000004938	NA	NA	predicted	15.8406	microcosm
rno-miR-23b-3p	MIMAT0000793	Eef1e1	291057	ENSRNOG00000016390	NA	NA	predicted	15.8306	microcosm
rno-miR-23b-3p	MIMAT0000793	Tfr2	288562	ENSRNOG00000001407	NA	NA	predicted	15.828	microcosm
rno-miR-23b-3p	MIMAT0000793	Ahcyl1_predicted			NA	NA	predicted	15.819	microcosm
rno-miR-23b-3p	MIMAT0000793	Stt3b	363160	ENSRNOG00000011922	NA	NA	predicted	15.816	microcosm
rno-miR-23b-3p	MIMAT0000793	Dph5	295394	ENSRNOG00000013719	NA	NA	predicted	15.8047	microcosm
rno-miR-23b-3p	MIMAT0000793	Lmo7	361084	ENSRNOG00000009702	NA	NA	predicted	15.8031	microcosm
rno-miR-23b-3p	MIMAT0000793	Gcnt3	286976	ENSRNOG00000059540	NA	NA	predicted	15.8017	microcosm
rno-miR-23b-3p	MIMAT0000793	LOC690585			NA	NA	predicted	15.7978	microcosm
rno-miR-23b-3p	MIMAT0000793	Lsm8	296913	ENSRNOG00000058677	NA	NA	predicted	15.7835	microcosm
rno-miR-23b-3p	MIMAT0000793	LOC100911983	100911983	ENSRNOG00000000446	NA	NA	predicted	15.7769	microcosm
rno-miR-23b-3p	MIMAT0000793	Ddx46	245957	ENSRNOG00000021637	NA	NA	predicted	15.7745	microcosm
rno-miR-23b-3p	MIMAT0000793	Tubb4b	296554	ENSRNOG00000010170	NA	NA	predicted	15.7745	microcosm
rno-miR-23b-3p	MIMAT0000793	Zfp593	298546	ENSRNOG00000016392	NA	NA	predicted	15.7745	microcosm
rno-miR-23b-3p	MIMAT0000793	Aif1l	362107	ENSRNOG00000009951	NA	NA	predicted	15.7745	microcosm
rno-miR-23b-3p	MIMAT0000793	Il21r	308977	ENSRNOG00000015773	NA	NA	predicted	15.7745	microcosm
rno-miR-23b-3p	MIMAT0000793	Nmb	499194	ENSRNOG00000011011	NA	NA	predicted	15.7745	microcosm
rno-miR-23b-3p	MIMAT0000793	Smarca3_predicted			NA	NA	predicted	15.772	microcosm
rno-miR-23b-3p	MIMAT0000793	Nppc	114593	ENSRNOG00000018854	NA	NA	predicted	15.766	microcosm
rno-miR-23b-3p	MIMAT0000793	Ntn1	114523	ENSRNOG00000003947	NA	NA	predicted	15.7538	microcosm
rno-miR-23b-3p	MIMAT0000793	RGD1561552	302367	ENSRNOG00000037827	NA	NA	predicted	15.7457	microcosm
rno-miR-23b-3p	MIMAT0000793	Gprc5d	500349	ENSRNOG00000008439	NA	NA	predicted	15.7437	microcosm
rno-miR-23b-3p	MIMAT0000793	Acsl5	94340	ENSRNOG00000016265	NA	NA	predicted	15.7364	microcosm
rno-miR-23b-3p	MIMAT0000793	Slc27a6	291582	ENSRNOG00000058193	NA	NA	predicted	15.7364	microcosm
rno-miR-23b-3p	MIMAT0000793	LOC100910486	100910486	ENSRNOG00000019733	NA	NA	predicted	15.7364	microcosm
rno-miR-23b-3p	MIMAT0000793	Zw10	363059	ENSRNOG00000007661	NA	NA	predicted	15.7364	microcosm
rno-miR-23b-3p	MIMAT0000793	Ctdp1	291414	ENSRNOG00000061474	NA	NA	predicted	15.7364	microcosm
rno-miR-23b-3p	MIMAT0000793	EG435366			NA	NA	predicted	15.7364	microcosm
rno-miR-23b-3p	MIMAT0000793	Zyg11a	313482	ENSRNOG00000010885	NA	NA	predicted	15.7364	microcosm
rno-miR-23b-3p	MIMAT0000793	Smad5	59328	ENSRNOG00000022870	NA	NA	predicted	15.7364	microcosm
rno-miR-23b-3p	MIMAT0000793	Ubqln1	114590	ENSRNOG00000019282	NA	NA	predicted	15.7364	microcosm
rno-miR-23b-3p	MIMAT0000793	Taar9	319107	ENSRNOG00000026096	NA	NA	predicted	15.7364	microcosm
rno-miR-23b-3p	MIMAT0000793	Ifngr1	116465	ENSRNOG00000012074	NA	NA	predicted	15.7331	microcosm
rno-miR-23b-3p	MIMAT0000793	Macc1	314539	ENSRNOG00000037436	NA	NA	predicted	15.7188	microcosm
rno-miR-23b-3p	MIMAT0000793	C8g_predicted			NA	NA	predicted	15.7159	microcosm
rno-miR-23b-3p	MIMAT0000793	Gprc5b_predicted			NA	NA	predicted	15.714	microcosm
rno-miR-23b-3p	MIMAT0000793	Kazald1	293997	ENSRNOG00000016058	NA	NA	predicted	15.712	microcosm
rno-miR-23b-3p	MIMAT0000793	Slc45a1	246258	ENSRNOG00000018229	NA	NA	predicted	15.7053	microcosm
rno-miR-23b-3p	MIMAT0000793	Mum1_predicted			NA	NA	predicted	15.696	microcosm
rno-miR-23b-3p	MIMAT0000793	Dmrta2_predicted			NA	NA	predicted	15.6951	microcosm
rno-miR-23b-3p	MIMAT0000793	Impa1	83523	ENSRNOG00000010482	NA	NA	predicted	15.6928	microcosm
rno-miR-23b-3p	MIMAT0000793	Cdc7_predicted			NA	NA	predicted	15.6899	microcosm
rno-miR-23b-3p	MIMAT0000793	Srpx	64316	ENSRNOG00000039666	NA	NA	predicted	15.6862	microcosm
rno-miR-23b-3p	MIMAT0000793	Olr1125	405180	ENSRNOG00000026489	NA	NA	predicted	15.6821	microcosm
rno-miR-23b-3p	MIMAT0000793	Zfyve19	499871	ENSRNOG00000012528	NA	NA	predicted	15.6813	microcosm
rno-miR-23b-3p	MIMAT0000793	Cyb5d2	303293	ENSRNOG00000024553	NA	NA	predicted	15.6787	microcosm
rno-miR-23b-3p	MIMAT0000793	Prss23	308807	ENSRNOG00000017307	NA	NA	predicted	-0.1055	miranda
rno-miR-23b-3p	MIMAT0000793	Hadhb	171155	ENSRNOG00000010800	NA	NA	predicted	-0.1056	miranda
rno-miR-23b-3p	MIMAT0000793	Giot1	171090	ENSRNOG00000008417	NA	NA	predicted	-0.1057	miranda
rno-miR-23b-3p	MIMAT0000793	Orc5	362304	ENSRNOG00000011519	NA	NA	predicted	-0.1057	miranda
rno-miR-23b-3p	MIMAT0000793	LOC499240	499240	ENSRNOG00000013713	NA	NA	predicted	-0.1059	miranda
rno-miR-23b-3p	MIMAT0000793	Egr1	24330	ENSRNOG00000019422	NA	NA	predicted	-0.1063	miranda
rno-miR-23b-3p	MIMAT0000793	Vps45	64516	ENSRNOG00000021173	NA	NA	predicted	-0.1064	miranda
rno-miR-23b-3p	MIMAT0000793	Cdc37l1	293886	ENSRNOG00000010967	NA	NA	predicted	-0.1066	miranda
rno-miR-23b-3p	MIMAT0000793	Araf	64363	ENSRNOG00000010838	NA	NA	predicted	-0.1067	miranda
rno-miR-23b-3p	MIMAT0000793	Nudt21	291877	ENSRNOG00000042983	NA	NA	predicted	-0.1069	miranda
rno-miR-23b-3p	MIMAT0000793	Fam104a	619573	ENSRNOG00000002851	NA	NA	predicted	-0.1071	miranda
rno-miR-23b-3p	MIMAT0000793	Gnrhr	81668	ENSRNOG00000002011	NA	NA	predicted	-0.1077	miranda
rno-miR-23b-3p	MIMAT0000793	Cmtm8	301045	ENSRNOG00000011201	NA	NA	predicted	-0.1079	miranda
rno-miR-23b-3p	MIMAT0000793	Rab28	117049	ENSRNOG00000017074	NA	NA	predicted	-0.1082	miranda
rno-miR-23b-3p	MIMAT0000793	Ppap2a	64369	ENSRNOG00000009980	NA	NA	predicted	-0.1083	miranda
rno-miR-23b-3p	MIMAT0000793	Gpr85	64020	ENSRNOG00000024636	NA	NA	predicted	-0.1087	miranda
rno-miR-23b-3p	MIMAT0000793	Ddx19a	292022	ENSRNOG00000018033	NA	NA	predicted	-0.1088	miranda
rno-miR-23b-3p	MIMAT0000793	Ddx19b	292022	ENSRNOG00000018033	NA	NA	predicted	-0.1088	miranda
rno-miR-23b-3p	MIMAT0000793	Myd88	301059	ENSRNOG00000013634	NA	NA	predicted	-0.109	miranda
rno-miR-23b-3p	MIMAT0000793	Anxa7	155423	ENSRNOG00000007136	NA	NA	predicted	-0.1092	miranda
rno-miR-23b-3p	MIMAT0000793	Acsl1	25288	ENSRNOG00000010633	NA	NA	predicted	-0.11	miranda
rno-miR-23b-3p	MIMAT0000793	Pxdc1	361238	ENSRNOG00000017093	NA	NA	predicted	-0.1103	miranda
rno-miR-23b-3p	MIMAT0000793	Csrp1	29276	ENSRNOG00000008937	NA	NA	predicted	-0.1104	miranda
rno-miR-23b-3p	MIMAT0000793	H3f3b	117056	ENSRNOG00000003220	NA	NA	predicted	-0.1111	miranda
rno-miR-23b-3p	MIMAT0000793	H3f3a	117056	ENSRNOG00000003220	NA	NA	predicted	-0.1111	miranda
rno-miR-23b-3p	MIMAT0000793	Ybx3	83807	ENSRNOG00000005480	NA	NA	predicted	-0.1116	miranda
rno-miR-23b-3p	MIMAT0000793	Kpna1	288064	ENSRNOG00000000399	NA	NA	predicted	-0.1123	miranda
rno-miR-23b-3p	MIMAT0000793	Fxyd7	63848	ENSRNOG00000021067	NA	NA	predicted	-0.1132	miranda
rno-miR-23b-3p	MIMAT0000793	Scn3b	245956	ENSRNOG00000057221	NA	NA	predicted	-0.1137	miranda
rno-miR-23b-3p	MIMAT0000793	Tcf21	252856	ENSRNOG00000016700	NA	NA	predicted	-0.1138	miranda
rno-miR-23b-3p	MIMAT0000793	Lamp5	362220	ENSRNOG00000005457	NA	NA	predicted	-0.1139	miranda
rno-miR-23b-3p	MIMAT0000793	Golph3l	310669	ENSRNOG00000047620	NA	NA	predicted	-0.1149	miranda
rno-miR-23b-3p	MIMAT0000793	Hivep2	29721	ENSRNOG00000011015	NA	NA	predicted	-0.1153	miranda
rno-miR-23b-3p	MIMAT0000793	Csn1s2b	286759	ENSRNOG00000039334	NA	NA	predicted	-0.1154	miranda
rno-miR-23b-3p	MIMAT0000793	Rhox4g	313451	ENSRNOG00000027994	NA	NA	predicted	-0.1166	miranda
rno-miR-23b-3p	MIMAT0000793	Nap1l4	361684	ENSRNOG00000020615	NA	NA	predicted	-0.1176	miranda
rno-miR-23b-3p	MIMAT0000793	Mpzl1	360871	ENSRNOG00000003248	NA	NA	predicted	-0.1177	miranda
rno-miR-23b-3p	MIMAT0000793	Tac1	24806	ENSRNOG00000007374	NA	NA	predicted	-0.1181	miranda
rno-miR-23b-3p	MIMAT0000793	Ptpra	25167	ENSRNOG00000021223	NA	NA	predicted	-0.1184	miranda
rno-miR-23b-3p	MIMAT0000793	Ran	84509	ENSRNOG00000000938	NA	NA	predicted	-0.1185	miranda
rno-miR-23b-3p	MIMAT0000793	Irs1	25467	ENSRNOG00000014597	NA	NA	predicted	-0.1189	miranda
rno-miR-23b-3p	MIMAT0000793	Ssx2ip	308023	ENSRNOG00000015425	NA	NA	predicted	-0.1198	miranda
rno-miR-23b-3p	MIMAT0000793	Sstr3	171044	ENSRNOG00000007332	NA	NA	predicted	-0.1208	miranda
rno-miR-23b-3p	MIMAT0000793	Atad1	309532	ENSRNOG00000010861	NA	NA	predicted	-0.1219	miranda
rno-miR-23b-3p	MIMAT0000793	Klra2	494194	ENSRNOG00000031515	NA	NA	predicted	-0.1235	miranda
rno-miR-23b-3p	MIMAT0000793	Timm17a	54311	ENSRNOG00000007040	NA	NA	predicted	-0.1237	miranda
rno-miR-23b-3p	MIMAT0000793	Arfgap1	246310	ENSRNOG00000043150	NA	NA	predicted	-0.1237	miranda
rno-miR-23b-3p	MIMAT0000793	Nfe2l2	83619	ENSRNOG00000001548	NA	NA	predicted	-0.124	miranda
rno-miR-23b-3p	MIMAT0000793	Cpt1a	25757	ENSRNOG00000014254	NA	NA	predicted	-0.1241	miranda
rno-miR-23b-3p	MIMAT0000793	Stbd1	305234	ENSRNOG00000002218	NA	NA	predicted	-0.1242	miranda
rno-miR-23b-3p	MIMAT0000793	Cd48	245962	ENSRNOG00000004737	NA	NA	predicted	-0.1253	miranda
rno-miR-23b-3p	MIMAT0000793	Uso1	56042	ENSRNOG00000002301	NA	NA	predicted	-0.1255	miranda
rno-miR-23b-3p	MIMAT0000793	Ralyl	294883	ENSRNOG00000011400	NA	NA	predicted	-0.1269	miranda
rno-miR-23b-3p	MIMAT0000793	Twf1	315265	ENSRNOG00000022507	NA	NA	predicted	-0.127	miranda
rno-miR-23b-3p	MIMAT0000793	Prkar1b	25521	ENSRNOG00000028733	NA	NA	predicted	-0.1272	miranda
rno-miR-23b-3p	MIMAT0000793	Vom1r101	286892	ENSRNOG00000029263	NA	NA	predicted	-0.1277	miranda
rno-miR-23b-3p	MIMAT0000793	Kcnd2	65180	ENSRNOG00000029610	NA	NA	predicted	-0.1279	miranda
rno-miR-23b-3p	MIMAT0000793	Npm1	25498	ENSRNOG00000004616	NA	NA	predicted	-0.1285	miranda
rno-miR-23b-3p	MIMAT0000793	Alg10	245960	ENSRNOG00000014511	NA	NA	predicted	-0.1289	miranda
rno-miR-23b-3p	MIMAT0000793	Psip1	313323	ENSRNOG00000011498	NA	NA	predicted	-0.1297	miranda
rno-miR-23b-3p	MIMAT0000793	Ppap2b	192270	ENSRNOG00000008116	NA	NA	predicted	-0.1299	miranda
rno-miR-23b-3p	MIMAT0000793	Mt1	24567	ENSRNOG00000038047	NA	NA	predicted	-0.1299	miranda
rno-miR-23b-3p	MIMAT0000793	Fbxo30	308283	ENSRNOG00000014852	NA	NA	predicted	-0.1305	miranda
rno-miR-23b-3p	MIMAT0000793	LOC100911993	362636	ENSRNOG00000013602	NA	NA	predicted	-0.131	miranda
rno-miR-23b-3p	MIMAT0000793	Galnt4	500826		NA	NA	predicted	-0.1311	miranda
rno-miR-23b-3p	MIMAT0000793	Tnf	24835	ENSRNOG00000000837	NA	NA	predicted	-0.1312	miranda
rno-miR-23b-3p	MIMAT0000793	Id2	25587	ENSRNOG00000007237	NA	NA	predicted	-0.1312	miranda
rno-miR-23b-3p	MIMAT0000793	Cyp2c22	171518	ENSRNOG00000021924	NA	NA	predicted	-0.1313	miranda
rno-miR-23b-3p	MIMAT0000793	Nsg1	25247	ENSRNOG00000005700	NA	NA	predicted	-0.1317	miranda
rno-miR-23b-3p	MIMAT0000793	Cldn1	65129	ENSRNOG00000001926	NA	NA	predicted	-0.1318	miranda
rno-miR-23b-3p	MIMAT0000793	Dnase1l3	116687	ENSRNOG00000009291	NA	NA	predicted	-0.1321	miranda
rno-miR-23b-3p	MIMAT0000793	Slc13a1	58980	ENSRNOG00000008121	NA	NA	predicted	-0.1322	miranda
rno-miR-23b-3p	MIMAT0000793	Gpm6a	306439	ENSRNOG00000010731	NA	NA	predicted	-0.1326	miranda
rno-miR-23b-3p	MIMAT0000793	Rap1a	295347	ENSRNOG00000032463	NA	NA	predicted	-0.1331	miranda
rno-miR-23b-3p	MIMAT0000793	Actr1b	316333	ENSRNOG00000016789	NA	NA	predicted	-0.1333	miranda
rno-miR-23b-3p	MIMAT0000793	Zfp830	497967	ENSRNOG00000007578	NA	NA	predicted	-0.1334	miranda
rno-miR-23b-3p	MIMAT0000793	Crh	81648	ENSRNOG00000012703	NA	NA	predicted	-0.1341	miranda
rno-miR-23b-3p	MIMAT0000793	Slc22a3	29504	ENSRNOG00000022946	NA	NA	predicted	-0.135	miranda
rno-miR-23b-3p	MIMAT0000793	Hspd1	63868	ENSRNOG00000014525	NA	NA	predicted	-0.1361	miranda
rno-miR-23b-3p	MIMAT0000793	Cox6c1	286962		NA	NA	predicted	-0.1366	miranda
rno-miR-23b-3p	MIMAT0000793	Hs3st2	293451	ENSRNOG00000017659	NA	NA	predicted	-0.1366	miranda
rno-miR-23b-3p	MIMAT0000793	Gcat	366959		NA	NA	predicted	-0.1373	miranda
rno-miR-23b-3p	MIMAT0000793	Matr3	29150	ENSRNOG00000019875	NA	NA	predicted	-0.1389	miranda
rno-miR-23b-3p	MIMAT0000793	Nxph1	25501	ENSRNOG00000008939	NA	NA	predicted	-0.1391	miranda
rno-miR-23b-3p	MIMAT0000793	Caskin1	140722	ENSRNOG00000003195	NA	NA	predicted	-0.1393	miranda
rno-miR-23b-3p	MIMAT0000793	Nr4a2	54278	ENSRNOG00000005600	NA	NA	predicted	-0.1395	miranda
rno-miR-23b-3p	MIMAT0000793	Hnrnpm	116655	ENSRNOG00000007921	NA	NA	predicted	-0.1398	miranda
rno-miR-23b-3p	MIMAT0000793	Cryzl1	288256	ENSRNOG00000028014	NA	NA	predicted	-0.1404	miranda
rno-miR-23b-3p	MIMAT0000793	Epn1	117277	ENSRNOG00000015753	NA	NA	predicted	-0.1404	miranda
rno-miR-23b-3p	MIMAT0000793	Cnksr2	59322	ENSRNOG00000007014	NA	NA	predicted	-0.141	miranda
rno-miR-23b-3p	MIMAT0000793	Atp6v1c1	299971	ENSRNOG00000004846	NA	NA	predicted	-0.1418	miranda
rno-miR-23b-3p	MIMAT0000793	Rap1b	171337	ENSRNOG00000007048	NA	NA	predicted	-0.142	miranda
rno-miR-23b-3p	MIMAT0000793	Fam43a	288031	ENSRNOG00000001728	NA	NA	predicted	-0.1423	miranda
rno-miR-23b-3p	MIMAT0000793	LOC100909474	288031	ENSRNOG00000001728	NA	NA	predicted	-0.1423	miranda
rno-miR-23b-3p	MIMAT0000793	Zfand6	293067	ENSRNOG00000013506	NA	NA	predicted	-0.1436	miranda
rno-miR-23b-3p	MIMAT0000793	Bsnd	192675	ENSRNOG00000006543	NA	NA	predicted	-0.1486	miranda
rno-miR-23b-3p	MIMAT0000793	Abcg5	114628	ENSRNOG00000005250	NA	NA	predicted	-0.1487	miranda
rno-miR-23b-3p	MIMAT0000793	Fam58b	303321	ENSRNOG00000022582	NA	NA	predicted	-0.1487	miranda
rno-miR-23b-3p	MIMAT0000793	Fv1	308568	ENSRNOG00000019132	NA	NA	predicted	-0.1489	miranda
rno-miR-23b-3p	MIMAT0000793	RGD1309106	360864	ENSRNOG00000026523	NA	NA	predicted	-0.1502	miranda
rno-miR-23b-3p	MIMAT0000793	Galnt13	311039	ENSRNOG00000005335	NA	NA	predicted	-0.1505	miranda
rno-miR-23b-3p	MIMAT0000793	Adk	25368	ENSRNOG00000012325	NA	NA	predicted	-0.1517	miranda
rno-miR-23b-3p	MIMAT0000793	Sec31a	93646	ENSRNOG00000002251	NA	NA	predicted	-0.1527	miranda
rno-miR-23b-3p	MIMAT0000793	Prpf19	246216	ENSRNOG00000020897	NA	NA	predicted	-0.1527	miranda
rno-miR-23b-3p	MIMAT0000793	Ephx2	65030	ENSRNOG00000017286	NA	NA	predicted	-0.1529	miranda
rno-miR-23b-3p	MIMAT0000793	Spdl1	303037	ENSRNOG00000007292	NA	NA	predicted	-0.1534	miranda
rno-miR-23b-3p	MIMAT0000793	Abcc5	116721	ENSRNOG00000029178	NA	NA	predicted	-0.1544	miranda
rno-miR-23b-3p	MIMAT0000793	Txndc15	307180	ENSRNOG00000000133	NA	NA	predicted	-0.1546	miranda
rno-miR-23b-3p	MIMAT0000793	Naaa	497009	ENSRNOG00000002273	NA	NA	predicted	-0.1551	miranda
rno-miR-23b-3p	MIMAT0000793	Ndufa5	25488	ENSRNOG00000005698	NA	NA	predicted	-0.1558	miranda
rno-miR-23b-3p	MIMAT0000793	St8sia1	25280	ENSRNOG00000014018	NA	NA	predicted	-0.1569	miranda
rno-miR-23b-3p	MIMAT0000793	RGD1306186	298621	ENSRNOG00000037039	NA	NA	predicted	-0.1583	miranda
rno-miR-23b-3p	MIMAT0000793	Aldoart2	299052	ENSRNOG00000030869	NA	NA	predicted	-0.1585	miranda
rno-miR-23b-3p	MIMAT0000793	Ptf1a	117034	ENSRNOG00000016902	NA	NA	predicted	-0.1586	miranda
rno-miR-23b-3p	MIMAT0000793	Klf4	114505	ENSRNOG00000016299	NA	NA	predicted	-0.1592	miranda
rno-miR-23b-3p	MIMAT0000793	Isy1	362394	ENSRNOG00000010021	NA	NA	predicted	-0.1594	miranda
rno-miR-23b-3p	MIMAT0000793	Cd44	25406	ENSRNOG00000006094	NA	NA	predicted	-0.16	miranda
rno-miR-23b-3p	MIMAT0000793	Zfp423	94188	ENSRNOG00000014658	NA	NA	predicted	-0.161	miranda
rno-miR-23b-3p	MIMAT0000793	Nudt3	294292	ENSRNOG00000061176	NA	NA	predicted	-0.1615	miranda
rno-miR-23b-3p	MIMAT0000793	Cyct	25310	ENSRNOG00000024457	NA	NA	predicted	-0.1625	miranda
rno-miR-23b-3p	MIMAT0000793	Pde11a	25310	ENSRNOG00000024457	NA	NA	predicted	-0.1625	miranda
rno-miR-23b-3p	MIMAT0000793	Atg9a	363254	ENSRNOG00000018975	NA	NA	predicted	-0.1646	miranda
rno-miR-23b-3p	MIMAT0000793	LOC497899	497899	ENSRNOG00000022555	NA	NA	predicted	-0.1665	miranda
rno-miR-23b-3p	MIMAT0000793	Ccl25	360750	ENSRNOG00000028531	NA	NA	predicted	-0.1673	miranda
rno-miR-23b-3p	MIMAT0000793	S100a10	81778	ENSRNOG00000023226	NA	NA	predicted	-0.1678	miranda
rno-miR-23b-3p	MIMAT0000793	Cdon	50938	ENSRNOG00000011789	NA	NA	predicted	-0.1683	miranda
rno-miR-23b-3p	MIMAT0000793	Elavl4	286973	ENSRNOG00000023601	NA	NA	predicted	-0.1687	miranda
rno-miR-23b-3p	MIMAT0000793	Abcb1a	170913	ENSRNOG00000008012	NA	NA	predicted	-0.169	miranda
rno-miR-23b-3p	MIMAT0000793	Net1	307098	ENSRNOG00000017765	NA	NA	predicted	-0.1698	miranda
rno-miR-23b-3p	MIMAT0000793	Cited2	114490	ENSRNOG00000056940	NA	NA	predicted	-0.17	miranda
rno-miR-23b-3p	MIMAT0000793	Fut2	58924	ENSRNOG00000021011	NA	NA	predicted	-0.17	miranda
rno-miR-23b-3p	MIMAT0000793	Plekhm1	303584	ENSRNOG00000028521	NA	NA	predicted	-0.1702	miranda
rno-miR-23b-3p	MIMAT0000793	Crebbp	54244	ENSRNOG00000005330	NA	NA	predicted	-0.172	miranda
rno-miR-23b-3p	MIMAT0000793	Abcd2	84356	ENSRNOG00000015538	NA	NA	predicted	-0.1725	miranda
rno-miR-23b-3p	MIMAT0000793	Tfpi	29436	ENSRNOG00000005039	NA	NA	predicted	-0.1739	miranda
rno-miR-23b-3p	MIMAT0000793	Scpep1	114861	ENSRNOG00000002358	NA	NA	predicted	-0.1753	miranda
rno-miR-23b-3p	MIMAT0000793	Cd1d1	25109	ENSRNOG00000016451	NA	NA	predicted	-0.1754	miranda
rno-miR-23b-3p	MIMAT0000793	Slc27a5	79111	ENSRNOG00000019626	NA	NA	predicted	-0.1754	miranda
rno-miR-23b-3p	MIMAT0000793	Tpsb2	29268	ENSRNOG00000018611	NA	NA	predicted	-0.1759	miranda
rno-miR-23b-3p	MIMAT0000793	Sat1	302642	ENSRNOG00000003809	NA	NA	predicted	-0.1772	miranda
rno-miR-23b-3p	MIMAT0000793	Akr1c14	191574	ENSRNOG00000017672	NA	NA	predicted	-0.1778	miranda
rno-miR-23b-3p	MIMAT0000793	Foxg1	24370	ENSRNOG00000047891	NA	NA	predicted	-0.1789	miranda
rno-miR-23b-3p	MIMAT0000793	Hnrnpa1	29578	ENSRNOG00000036839	NA	NA	predicted	-0.18	miranda
rno-miR-23b-3p	MIMAT0000793	Nr4a3	58853	ENSRNOG00000005964	NA	NA	predicted	-0.1808	miranda
rno-miR-23b-3p	MIMAT0000793	Tpp2	81815	ENSRNOG00000011194	NA	NA	predicted	-0.1811	miranda
rno-miR-23b-3p	MIMAT0000793	Cep63	300963	ENSRNOG00000008410	NA	NA	predicted	-0.1827	miranda
rno-miR-23b-3p	MIMAT0000793	Arpc1b	54227	ENSRNOG00000000991	NA	NA	predicted	-0.1855	miranda
rno-miR-23b-3p	MIMAT0000793	Usp14	291796	ENSRNOG00000014981	NA	NA	predicted	-0.1855	miranda
rno-miR-23b-3p	MIMAT0000793	Nrg1	112400	ENSRNOG00000010392	NA	NA	predicted	-0.1855	miranda
rno-miR-23b-3p	MIMAT0000793	Fgl2	84586	ENSRNOG00000012881	NA	NA	predicted	-0.1857	miranda
rno-miR-23b-3p	MIMAT0000793	Fads1	84575	ENSRNOG00000020480	NA	NA	predicted	-0.1869	miranda
rno-miR-23b-3p	MIMAT0000793	Syne1	499010	ENSRNOG00000018960	NA	NA	predicted	-0.1874	miranda
rno-miR-23b-3p	MIMAT0000793	Arhgap17	63994	ENSRNOG00000013836	NA	NA	predicted	-0.1878	miranda
rno-miR-23b-3p	MIMAT0000793	Vapa	58857	ENSRNOG00000014765	NA	NA	predicted	-0.1879	miranda
rno-miR-23b-3p	MIMAT0000793	Trnt1	312616	ENSRNOG00000006432	NA	NA	predicted	-0.1879	miranda
rno-miR-23b-3p	MIMAT0000793	LOC100911093	312616	ENSRNOG00000006432	NA	NA	predicted	-0.1879	miranda
rno-miR-23b-3p	MIMAT0000793	Mapkapk5	498183	ENSRNOG00000001345	NA	NA	predicted	-0.1891	miranda
rno-miR-23b-3p	MIMAT0000793	Orc4	295596	ENSRNOG00000005021	NA	NA	predicted	-0.1893	miranda
rno-miR-23b-3p	MIMAT0000793	Trmt10c	304012	ENSRNOG00000039567	NA	NA	predicted	-0.1903	miranda
rno-miR-23b-3p	MIMAT0000793	Sult1b1	64305	ENSRNOG00000001967	NA	NA	predicted	-0.1906	miranda
rno-miR-23b-3p	MIMAT0000793	Nt5e	58813	ENSRNOG00000011071	NA	NA	predicted	-0.1921	miranda
rno-miR-23b-3p	MIMAT0000793	Dspp	25254	ENSRNOG00000002168	NA	NA	predicted	-0.1926	miranda
rno-miR-23b-3p	MIMAT0000793	Phactr2	308291	ENSRNOG00000015473	NA	NA	predicted	-0.1944	miranda
rno-miR-23b-3p	MIMAT0000793	Vom2r53	286915	ENSRNOG00000007730	NA	NA	predicted	-0.1944	miranda
rno-miR-23b-3p	MIMAT0000793	Tmem140	362334	ENSRNOG00000026965	NA	NA	predicted	-0.1985	miranda
rno-miR-23b-3p	MIMAT0000793	Rad21	314949	ENSRNOG00000004420	NA	NA	predicted	-0.205	miranda
rno-miR-23b-3p	MIMAT0000793	Tox4	286990	ENSRNOG00000012844	NA	NA	predicted	-0.2061	miranda
rno-miR-23b-3p	MIMAT0000793	Areg	29183	ENSRNOG00000002754	NA	NA	predicted	-0.2064	miranda
rno-miR-23b-3p	MIMAT0000793	Lyar	289707	ENSRNOG00000005374	NA	NA	predicted	-0.2068	miranda
rno-miR-23b-3p	MIMAT0000793	Gabrb3	24922	ENSRNOG00000014938	NA	NA	predicted	-0.2094	miranda
rno-miR-23b-3p	MIMAT0000793	Mapk6	58840	ENSRNOG00000009381	NA	NA	predicted	-0.2114	miranda
rno-miR-23b-3p	MIMAT0000793	Wwp1	297930	ENSRNOG00000006328	NA	NA	predicted	-0.2119	miranda
rno-miR-23b-3p	MIMAT0000793	Cd69	29187	ENSRNOG00000056783	NA	NA	predicted	-0.2119	miranda
rno-miR-23b-3p	MIMAT0000793	Smad7	81516	ENSRNOG00000018359	NA	NA	predicted	-0.2149	miranda
rno-miR-23b-3p	MIMAT0000793	Kcnmb2	294961	ENSRNOG00000010094	NA	NA	predicted	-0.2174	miranda
rno-miR-23b-3p	MIMAT0000793	Rgs1	54289	ENSRNOG00000003895	NA	NA	predicted	-0.2175	miranda
rno-miR-23b-3p	MIMAT0000793	Scn9a	78956	ENSRNOG00000006639	NA	NA	predicted	-0.2182	miranda
rno-miR-23b-3p	MIMAT0000793	Ggcx	81716	ENSRNOG00000012975	NA	NA	predicted	-0.2194	miranda
rno-miR-23b-3p	MIMAT0000793	C4bpa	24235	ENSRNOG00000004062	NA	NA	predicted	-0.2211	miranda
rno-miR-23b-3p	MIMAT0000793	Lrit1	246214	ENSRNOG00000012790	NA	NA	predicted	-0.2229	miranda
rno-miR-23b-3p	MIMAT0000793	Cdkn2aip	306455	ENSRNOG00000022736	NA	NA	predicted	-0.2235	miranda
rno-miR-23b-3p	MIMAT0000793	Hck	25734	ENSRNOG00000009331	NA	NA	predicted	-0.2237	miranda
rno-miR-23b-3p	MIMAT0000793	Rims2	116839	ENSRNOG00000004201	NA	NA	predicted	-0.2239	miranda
rno-miR-23b-3p	MIMAT0000793	Otud5	363452	ENSRNOG00000008764	NA	NA	predicted	-0.2239	miranda
rno-miR-23b-3p	MIMAT0000793	Shank2	171093	ENSRNOG00000050206	NA	NA	predicted	-0.2241	miranda
rno-miR-23b-3p	MIMAT0000793	Thrap3	313591	ENSRNOG00000009977	NA	NA	predicted	-0.2246	miranda
rno-miR-23b-3p	MIMAT0000793	Klf15	85497	ENSRNOG00000017808	NA	NA	predicted	-0.2252	miranda
rno-miR-23b-3p	MIMAT0000793	Hmgcs1	29637	ENSRNOG00000016552	NA	NA	predicted	-0.2258	miranda
rno-miR-23b-3p	MIMAT0000793	Uqcrq	497902	ENSRNOG00000048174	NA	NA	predicted	-0.2261	miranda
rno-miR-23b-3p	MIMAT0000793	Dync1li2	81655	ENSRNOG00000025791	NA	NA	predicted	-0.2263	miranda
rno-miR-23b-3p	MIMAT0000793	Nap1l2	317247		NA	NA	predicted	-0.2293	miranda
rno-miR-23b-3p	MIMAT0000793	Plekhb1	64471	ENSRNOG00000018627	NA	NA	predicted	-0.2293	miranda
rno-miR-23b-3p	MIMAT0000793	Gadd45a	25112	ENSRNOG00000005615	NA	NA	predicted	-0.233	miranda
rno-miR-23b-3p	MIMAT0000793	Pcgf1	312480	ENSRNOG00000008360	NA	NA	predicted	-0.2371	miranda
rno-miR-23b-3p	MIMAT0000793	Phlpp1	59265	ENSRNOG00000002821	NA	NA	predicted	-0.2379	miranda
rno-miR-23b-3p	MIMAT0000793	Pkib	24678	ENSRNOG00000000811	NA	NA	predicted	-0.2391	miranda
rno-miR-23b-3p	MIMAT0000793	Hexim1	498008	ENSRNOG00000003203	NA	NA	predicted	-0.2418	miranda
rno-miR-23b-3p	MIMAT0000793	Mgme1	296200	ENSRNOG00000028196	NA	NA	predicted	-0.2454	miranda
rno-miR-23b-3p	MIMAT0000793	Ndel1	170845	ENSRNOG00000004139	NA	NA	predicted	-0.2463	miranda
rno-miR-23b-3p	MIMAT0000793	Taldo1	83688	ENSRNOG00000018367	NA	NA	predicted	-0.2513	miranda
rno-miR-23b-3p	MIMAT0000793	Snap29	116500	ENSRNOG00000001867	NA	NA	predicted	-0.2538	miranda
rno-miR-23b-3p	MIMAT0000793	LOC501110	501110	ENSRNOG00000033402	NA	NA	predicted	-0.2538	miranda
rno-miR-23b-3p	MIMAT0000793	Phyhipl	309901	ENSRNOG00000000274	NA	NA	predicted	-0.2616	miranda
rno-miR-23b-3p	MIMAT0000793	Casc3	259170	ENSRNOG00000009716	NA	NA	predicted	-0.263	miranda
rno-miR-23b-3p	MIMAT0000793	Ccr6	308163	ENSRNOG00000012964	NA	NA	predicted	-0.2633	miranda
rno-miR-23b-3p	MIMAT0000793	Tmprss11g	289546	ENSRNOG00000029964	NA	NA	predicted	-0.2643	miranda
rno-miR-23b-3p	MIMAT0000793	Bex4	501624	ENSRNOG00000028608	NA	NA	predicted	-0.2655	miranda
rno-miR-23b-3p	MIMAT0000793	Cyp7a1	25428	ENSRNOG00000009488	NA	NA	predicted	-0.2661	miranda
rno-miR-23b-3p	MIMAT0000793	Sfxn1	364678	ENSRNOG00000018279	NA	NA	predicted	-0.2703	miranda
rno-miR-23b-3p	MIMAT0000793	St3gal5	83505	ENSRNOG00000010284	NA	NA	predicted	-0.2744	miranda
rno-miR-23b-3p	MIMAT0000793	Mgp	25333	ENSRNOG00000005695	NA	NA	predicted	-0.2758	miranda
rno-miR-23b-3p	MIMAT0000793	Inppl1	65038		NA	NA	predicted	-0.2815	miranda
rno-miR-23b-3p	MIMAT0000793	Ogt	26295	ENSRNOG00000003359	NA	NA	predicted	-0.2819	miranda
rno-miR-23b-3p	MIMAT0000793	Cyb5a	64001	ENSRNOG00000015205	NA	NA	predicted	-0.2867	miranda
rno-miR-23b-3p	MIMAT0000793	Pitx2	54284	ENSRNOG00000010681	NA	NA	predicted	-0.2879	miranda
rno-miR-23b-3p	MIMAT0000793	Atp6v1d	299159	ENSRNOG00000009080	NA	NA	predicted	-0.2931	miranda
rno-miR-23b-3p	MIMAT0000793	Rarres1	310486	ENSRNOG00000037853	NA	NA	predicted	-0.294	miranda
rno-miR-23b-3p	MIMAT0000793	Hfe	29199	ENSRNOG00000016967	NA	NA	predicted	-0.2965	miranda
rno-miR-23b-3p	MIMAT0000793	Grem1	50566	ENSRNOG00000026053	NA	NA	predicted	-0.2972	miranda
rno-miR-23b-3p	MIMAT0000793	Barhl1	117232	ENSRNOG00000013209	NA	NA	predicted	-0.2996	miranda
rno-miR-23b-3p	MIMAT0000793	Atg3	171415	ENSRNOG00000002094	NA	NA	predicted	-0.2997	miranda
rno-miR-23b-3p	MIMAT0000793	Tpm1	117557	ENSRNOG00000018184	NA	NA	predicted	-0.3032	miranda
rno-miR-23b-3p	MIMAT0000793	Cdc73	304832	ENSRNOG00000003258	NA	NA	predicted	-0.3064	miranda
rno-miR-23b-3p	MIMAT0000793	Atg12	361321	ENSRNOG00000000157	NA	NA	predicted	-0.3083	miranda
rno-miR-23b-3p	MIMAT0000793	Atl1	362750	ENSRNOG00000005063	NA	NA	predicted	-0.3096	miranda
rno-miR-23b-3p	MIMAT0000793	Cdc5l	85434	ENSRNOG00000019975	NA	NA	predicted	-0.31	miranda
rno-miR-23b-3p	MIMAT0000793	Wee1	308937	ENSRNOG00000010017	NA	NA	predicted	-0.3112	miranda
rno-miR-23b-3p	MIMAT0000793	Ret	24716	ENSRNOG00000014751	NA	NA	predicted	-0.3145	miranda
rno-miR-23b-3p	MIMAT0000793	Vtcn1	295322	ENSRNOG00000015279	NA	NA	predicted	-0.3145	miranda
rno-miR-23b-3p	MIMAT0000793	Nrcam	497815	ENSRNOG00000004067	NA	NA	predicted	-0.3165	miranda
rno-miR-23b-3p	MIMAT0000793	Scrn2	360612	ENSRNOG00000010214	NA	NA	predicted	-0.3169	miranda
rno-miR-23b-3p	MIMAT0000793	Trak2	171086	ENSRNOG00000010881	NA	NA	predicted	-0.317	miranda
rno-miR-23b-3p	MIMAT0000793	Rassf4	362423	ENSRNOG00000013526	NA	NA	predicted	-0.3173	miranda
rno-miR-23b-3p	MIMAT0000793	Prl5a1	171556	ENSRNOG00000016307	NA	NA	predicted	-0.3183	miranda
rno-miR-23b-3p	MIMAT0000793	Arf3	140940	ENSRNOG00000054775	NA	NA	predicted	-0.3189	miranda
rno-miR-23b-3p	MIMAT0000793	Cacna2d1	25399	ENSRNOG00000033531	NA	NA	predicted	-0.3254	miranda
rno-miR-23b-3p	MIMAT0000793	Tgfb2	81809	ENSRNOG00000002418	NA	NA	predicted	-0.327	miranda
rno-miR-23b-3p	MIMAT0000793	Bad	64639	ENSRNOG00000021147	NA	NA	predicted	-0.336	miranda
rno-miR-23b-3p	MIMAT0000793	Dnm1l	114114	ENSRNOG00000001813	NA	NA	predicted	-0.3449	miranda
rno-miR-23b-3p	MIMAT0000793	Abca5	286970	ENSRNOG00000004378	NA	NA	predicted	-0.3534	miranda
rno-miR-23b-3p	MIMAT0000793	Snca	29219	ENSRNOG00000008656	NA	NA	predicted	-0.3539	miranda
rno-miR-23b-3p	MIMAT0000793	Cacna1b	257648	ENSRNOG00000004560	NA	NA	predicted	-0.3557	miranda
rno-miR-23b-3p	MIMAT0000793	RGD1562218	292100	ENSRNOG00000019169	NA	NA	predicted	-0.3568	miranda
rno-miR-23b-3p	MIMAT0000793	Ehd4	192204	ENSRNOG00000007584	NA	NA	predicted	-0.3578	miranda
rno-miR-23b-3p	MIMAT0000793	Nr4a1	79240	ENSRNOG00000007607	NA	NA	predicted	-0.3588	miranda
rno-miR-23b-3p	MIMAT0000793	Rab1b	81754	ENSRNOG00000050510	NA	NA	predicted	-0.3655	miranda
rno-miR-23b-3p	MIMAT0000793	LOC102555167	81754	ENSRNOG00000050510	NA	NA	predicted	-0.3655	miranda
rno-miR-23b-3p	MIMAT0000793	LOC100363782	81754	ENSRNOG00000050510	NA	NA	predicted	-0.3655	miranda
rno-miR-23b-3p	MIMAT0000793	Itpkc	308451	ENSRNOG00000013945	NA	NA	predicted	-0.3673	miranda
rno-miR-23b-3p	MIMAT0000793	Itfg1	171083	ENSRNOG00000015843	NA	NA	predicted	-0.3691	miranda
rno-miR-23b-3p	MIMAT0000793	Fen1	84490	ENSRNOG00000020531	NA	NA	predicted	-0.3764	miranda
rno-miR-23b-3p	MIMAT0000793	Tbxas1	24886	ENSRNOG00000007918	NA	NA	predicted	-0.3776	miranda
rno-miR-23b-3p	MIMAT0000793	Ypel5	298792	ENSRNOG00000026742	NA	NA	predicted	-0.3802	miranda
rno-miR-23b-3p	MIMAT0000793	Snx11	303493	ENSRNOG00000008642	NA	NA	predicted	-0.3828	miranda
rno-miR-23b-3p	MIMAT0000793	LOC678813	170946	ENSRNOG00000050065	NA	NA	predicted	-0.3869	miranda
rno-miR-23b-3p	MIMAT0000793	Marf1	170946	ENSRNOG00000002314	NA	NA	predicted	-0.3869	miranda
rno-miR-23b-3p	MIMAT0000793	LOC100910288	170946	ENSRNOG00000050065	NA	NA	predicted	-0.3869	miranda
rno-miR-23b-3p	MIMAT0000793	Ankra2	294679	ENSRNOG00000016622	NA	NA	predicted	-0.3874	miranda
rno-miR-23b-3p	MIMAT0000793	LOC100360129	294679	ENSRNOG00000016622	NA	NA	predicted	-0.3874	miranda
rno-miR-23b-3p	MIMAT0000793	LOC100910438	294679	ENSRNOG00000048118	NA	NA	predicted	-0.3874	miranda
rno-miR-23b-3p	MIMAT0000793	Smarce1	303518	ENSRNOG00000010676	NA	NA	predicted	-0.3946	miranda
rno-miR-23b-3p	MIMAT0000793	Klhdc10	312199	ENSRNOG00000010267	NA	NA	predicted	-0.3952	miranda
rno-miR-23b-3p	MIMAT0000793	Negr1	59318		NA	NA	predicted	-0.4008	miranda
rno-miR-23b-3p	MIMAT0000793	Adrb3	25645	ENSRNOG00000012674	NA	NA	predicted	-0.4015	miranda
rno-miR-23b-3p	MIMAT0000793	Rnls	361751	ENSRNOG00000020705	NA	NA	predicted	-0.4068	miranda
rno-miR-23b-3p	MIMAT0000793	LOC100361492	25011	ENSRNOG00000047945	NA	NA	predicted	-0.4088	miranda
rno-miR-23b-3p	MIMAT0000793	Cyp2c12	25011	ENSRNOG00000047945	NA	NA	predicted	-0.4088	miranda
rno-miR-23b-3p	MIMAT0000793	Prmt3	89820	ENSRNOG00000014829	NA	NA	predicted	-0.4284	miranda
rno-miR-23b-3p	MIMAT0000793	Tex261	297392	ENSRNOG00000013712	NA	NA	predicted	-0.4301	miranda
rno-miR-23b-3p	MIMAT0000793	Pdyn	29190	ENSRNOG00000026036	NA	NA	predicted	-0.4365	miranda
rno-miR-23b-3p	MIMAT0000793	LOC100362980	361888	ENSRNOG00000047506	NA	NA	predicted	-0.4439	miranda
rno-miR-23b-3p	MIMAT0000793	Nudt4	94267	ENSRNOG00000009094	NA	NA	predicted	-0.4448	miranda
rno-miR-23b-3p	MIMAT0000793	Snx15	293691	ENSRNOG00000021007	NA	NA	predicted	-0.4449	miranda
rno-miR-23b-3p	MIMAT0000793	Chst1	295934	ENSRNOG00000007989	NA	NA	predicted	-0.4632	miranda
rno-miR-23b-3p	MIMAT0000793	Git2	304546	ENSRNOG00000001190	NA	NA	predicted	-0.4649	miranda
rno-miR-23b-3p	MIMAT0000793	Pole3	298098	ENSRNOG00000004843	NA	NA	predicted	-0.4718	miranda
rno-miR-23b-3p	MIMAT0000793	LOC100362333	298098	ENSRNOG00000004843	NA	NA	predicted	-0.4718	miranda
rno-miR-23b-3p	MIMAT0000793	Wbp4	114765	ENSRNOG00000011678	NA	NA	predicted	-0.4767	miranda
rno-miR-23b-3p	MIMAT0000793	Prkcd	170538	ENSRNOG00000016346	NA	NA	predicted	-0.4805	miranda
rno-miR-23b-3p	MIMAT0000793	Cast	25403	ENSRNOG00000010286	NA	NA	predicted	-0.4864	miranda
rno-miR-23b-3p	MIMAT0000793	Picalm	89816	ENSRNOG00000018322	NA	NA	predicted	-0.4976	miranda
rno-miR-23b-3p	MIMAT0000793	Tspan12	362326	ENSRNOG00000059016	NA	NA	predicted	-0.5002	miranda
rno-miR-23b-3p	MIMAT0000793	Itgbl1	498564	ENSRNOG00000004516	NA	NA	predicted	-0.5045	miranda
rno-miR-23b-3p	MIMAT0000793	Bmpr1a	81507	ENSRNOG00000052469	NA	NA	predicted	-0.5062	miranda
rno-miR-23b-3p	MIMAT0000793	Prom1	60357	ENSRNOG00000003098	NA	NA	predicted	-0.5143	miranda
rno-miR-23b-3p	MIMAT0000793	Mycn	298894	ENSRNOG00000051372	NA	NA	predicted	-0.5172	miranda
rno-miR-23b-3p	MIMAT0000793	Pax6	25509	ENSRNOG00000004410	NA	NA	predicted	-0.5227	miranda
rno-miR-23b-3p	MIMAT0000793	RGD1309534	363016	ENSRNOG00000010887	NA	NA	predicted	-0.5247	miranda
rno-miR-23b-3p	MIMAT0000793	Znf667	308326		NA	NA	predicted	-0.5256	miranda
rno-miR-23b-3p	MIMAT0000793	Mrs2	79032	ENSRNOG00000017545	NA	NA	predicted	-0.5271	miranda
rno-miR-23b-3p	MIMAT0000793	Cept1	310773	ENSRNOG00000017723	NA	NA	predicted	-0.5348	miranda
rno-miR-23b-3p	MIMAT0000793	Jak2	24514	ENSRNOG00000059968	NA	NA	predicted	-0.5387	miranda
rno-miR-23b-3p	MIMAT0000793	Plagl1	25157	ENSRNOG00000025587	NA	NA	predicted	-0.5395	miranda
rno-miR-23b-3p	MIMAT0000793	Prim1	246327	ENSRNOG00000031993	NA	NA	predicted	-0.5408	miranda
rno-miR-23b-3p	MIMAT0000793	Stx1b	24923	ENSRNOG00000019193	NA	NA	predicted	-0.5414	miranda
rno-miR-23b-3p	MIMAT0000793	Trdn	59299	ENSRNOG00000012609	NA	NA	predicted	-0.5426	miranda
rno-miR-23b-3p	MIMAT0000793	Slc37a1	294321	ENSRNOG00000001169	NA	NA	predicted	-0.5477	miranda
rno-miR-23b-3p	MIMAT0000793	Spib	499146	ENSRNOG00000019660	NA	NA	predicted	-0.561	miranda
rno-miR-23b-3p	MIMAT0000793	Sart1	29678	ENSRNOG00000020475	NA	NA	predicted	-0.5627	miranda
rno-miR-23b-3p	MIMAT0000793	Trhr	25570	ENSRNOG00000005048	NA	NA	predicted	-0.5709	miranda
rno-miR-23b-3p	MIMAT0000793	Ddi2	313668	ENSRNOG00000012274	NA	NA	predicted	-0.5765	miranda
rno-miR-23b-3p	MIMAT0000793	Bicd2	306809	ENSRNOG00000016031	NA	NA	predicted	-0.5846	miranda
rno-miR-23b-3p	MIMAT0000793	LOC100909867	286933	ENSRNOG00000048417	NA	NA	predicted	-0.5914	miranda
rno-miR-23b-3p	MIMAT0000793	Obp2b	286933	ENSRNOG00000027963	NA	NA	predicted	-0.5914	miranda
rno-miR-23b-3p	MIMAT0000793	LOC100362612	286933	ENSRNOG00000027963	NA	NA	predicted	-0.5914	miranda
rno-miR-23b-3p	MIMAT0000793	Gjd2	50564	ENSRNOG00000008337	NA	NA	predicted	-0.5985	miranda
rno-miR-23b-3p	MIMAT0000793	Acat2	308100	ENSRNOG00000019189	NA	NA	predicted	-0.6192	miranda
rno-miR-23b-3p	MIMAT0000793	RGD1562948	308100	ENSRNOG00000019189	NA	NA	predicted	-0.6192	miranda
rno-miR-23b-3p	MIMAT0000793	Rbbp9	29459	ENSRNOG00000007972	NA	NA	predicted	-0.6241	miranda
rno-miR-23b-3p	MIMAT0000793	Rbm48	296840	ENSRNOG00000008980	NA	NA	predicted	-0.6298	miranda
rno-miR-23b-3p	MIMAT0000793	Gnai3	25643	ENSRNOG00000019465	NA	NA	predicted	-0.6357	miranda
rno-miR-23b-3p	MIMAT0000793	Ntrk2	25054	ENSRNOG00000018839	NA	NA	predicted	-0.651	miranda
rno-miR-23b-3p	MIMAT0000793	Vcsa1	24867	ENSRNOG00000001942	NA	NA	predicted	-0.6609	miranda
rno-miR-23b-3p	MIMAT0000793	Klhl24	303803	ENSRNOG00000033372	NA	NA	predicted	-0.6614	miranda
rno-miR-23b-3p	MIMAT0000793	Slc1a1	25550	ENSRNOG00000014816	NA	NA	predicted	-0.662	miranda
rno-miR-23b-3p	MIMAT0000793	mrpl24	295224	ENSRNOG00000022234	NA	NA	predicted	-0.6808	miranda
rno-miR-23b-3p	MIMAT0000793	Gatad2a	290669	ENSRNOG00000022173	NA	NA	predicted	-0.6832	miranda
rno-miR-23b-3p	MIMAT0000793	Prepl	298771	ENSRNOG00000007326	NA	NA	predicted	-0.6845	miranda
rno-miR-23b-3p	MIMAT0000793	Dpcd	294004	ENSRNOG00000017241	NA	NA	predicted	-0.6908	miranda
rno-miR-23b-3p	MIMAT0000793	Il2	116562	ENSRNOG00000017348	NA	NA	predicted	-0.7063	miranda
rno-miR-23b-3p	MIMAT0000793	Btla	407756	ENSRNOG00000030246	NA	NA	predicted	-0.7111	miranda
rno-miR-23b-3p	MIMAT0000793	Tars	294810	ENSRNOG00000019023	NA	NA	predicted	-0.7201	miranda
rno-miR-23b-3p	MIMAT0000793	Rpap1	311338	ENSRNOG00000005483	NA	NA	predicted	-0.7206	miranda
rno-miR-23b-3p	MIMAT0000793	Prkag2	373545	ENSRNOG00000009085	NA	NA	predicted	-0.7352	miranda
rno-miR-23b-3p	MIMAT0000793	Chrna5	25102	ENSRNOG00000013610	NA	NA	predicted	-0.746	miranda
rno-miR-23b-3p	MIMAT0000793	Slc9a5	192215	ENSRNOG00000028844	NA	NA	predicted	-0.7497	miranda
rno-miR-23b-3p	MIMAT0000793	Fam96a	300797	ENSRNOG00000017119	NA	NA	predicted	-0.7661	miranda
rno-miR-23b-3p	MIMAT0000793	Pipox	303272	ENSRNOG00000008798	NA	NA	predicted	-0.7689	miranda
rno-miR-23b-3p	MIMAT0000793	Has3	266805	ENSRNOG00000059362	NA	NA	predicted	-0.7777	miranda
rno-miR-23b-3p	MIMAT0000793	Ppp1cc	24669	ENSRNOG00000001269	NA	NA	predicted	-0.809	miranda
rno-miR-23b-3p	MIMAT0000793	LOC100909787	116718	ENSRNOG00000050704	NA	NA	predicted	-0.8105	miranda
rno-miR-23b-3p	MIMAT0000793	Pex12	116718	ENSRNOG00000009718	NA	NA	predicted	-0.8105	miranda
rno-miR-23b-3p	MIMAT0000793	LOC100910934	307415	ENSRNOG00000049893	NA	NA	predicted	-0.8236	miranda
rno-miR-23b-3p	MIMAT0000793	RGD1309362	307415	ENSRNOG00000038960	NA	NA	predicted	-0.8236	miranda
rno-miR-23b-3p	MIMAT0000793	Ccnl1	114121	ENSRNOG00000011586	NA	NA	predicted	-0.825	miranda
rno-miR-23b-3p	MIMAT0000793	Acsm5	361637	ENSRNOG00000031211	NA	NA	predicted	-0.8333	miranda
rno-miR-23b-3p	MIMAT0000793	Gyg1	81675	ENSRNOG00000011146	NA	NA	predicted	-0.8359	miranda
rno-miR-23b-3p	MIMAT0000793	Sh2d4a	306376	ENSRNOG00000013541	NA	NA	predicted	-0.8422	miranda
rno-miR-23b-3p	MIMAT0000793	Tmprss5	266681	ENSRNOG00000008058	NA	NA	predicted	-0.8475	miranda
rno-miR-23b-3p	MIMAT0000793	Sub1	192269	ENSRNOG00000050563	NA	NA	predicted	-0.8486	miranda
rno-miR-23b-3p	MIMAT0000793	Glyr1	360477	ENSRNOG00000003065	NA	NA	predicted	-0.8557	miranda
rno-miR-23b-3p	MIMAT0000793	Ppib	64367	ENSRNOG00000016781	NA	NA	predicted	-0.8589	miranda
rno-miR-23b-3p	MIMAT0000793	Psg19	24256	ENSRNOG00000038101	NA	NA	predicted	-0.8602	miranda
rno-miR-23b-3p	MIMAT0000793	LOC100360737	24256	ENSRNOG00000038101	NA	NA	predicted	-0.8602	miranda
rno-miR-23b-3p	MIMAT0000793	Ccna2	114494	ENSRNOG00000015423	NA	NA	predicted	-0.8778	miranda
rno-miR-23b-3p	MIMAT0000793	Vom1r100	297439	ENSRNOG00000047408	NA	NA	predicted	-0.8911	miranda
rno-miR-23b-3p	MIMAT0000793	Glra2	24397	ENSRNOG00000003313	NA	NA	predicted	-0.8923	miranda
rno-miR-23b-3p	MIMAT0000793	LOC100910572	24397	ENSRNOG00000003313	NA	NA	predicted	-0.8923	miranda
rno-miR-23b-3p	MIMAT0000793	Cbfb	361391	ENSRNOG00000014647	NA	NA	predicted	-0.8958	miranda
rno-miR-23b-3p	MIMAT0000793	Tssk5	315095	ENSRNOG00000013753	NA	NA	predicted	-0.8978	miranda
rno-miR-23b-3p	MIMAT0000793	Msantd4	500941	ENSRNOG00000022245	NA	NA	predicted	-0.9018	miranda
rno-miR-23b-3p	MIMAT0000793	Dynlt3	363448	ENSRNOG00000003611	NA	NA	predicted	-0.9061	miranda
rno-miR-23b-3p	MIMAT0000793	Igf1	24482	ENSRNOG00000004517	NA	NA	predicted	-0.9109	miranda
rno-miR-23b-3p	MIMAT0000793	Mpdz	29365	ENSRNOG00000007894	NA	NA	predicted	-0.9115	miranda
rno-miR-23b-3p	MIMAT0000793	Gucy1a3	497757	ENSRNOG00000012302	NA	NA	predicted	-0.9329	miranda
rno-miR-23b-3p	MIMAT0000793	Lnpep	171105	ENSRNOG00000047387	NA	NA	predicted	-0.9348	miranda
rno-miR-23b-3p	MIMAT0000793	Gcsh	171133	ENSRNOG00000011535	NA	NA	predicted	-0.9459	miranda
rno-miR-23b-3p	MIMAT0000793	Akr1b8	286921	ENSRNOG00000009734	NA	NA	predicted	-0.9471	miranda
rno-miR-23b-3p	MIMAT0000793	Erap1	80897	ENSRNOG00000009997	NA	NA	predicted	-0.9484	miranda
rno-miR-23b-3p	MIMAT0000793	Tmem168	312135	ENSRNOG00000057290	NA	NA	predicted	-0.9529	miranda
rno-miR-23b-3p	MIMAT0000793	Fmr1	24948	ENSRNOG00000057464	NA	NA	predicted	-0.9541	miranda
rno-miR-23b-3p	MIMAT0000793	LOC619574	619574	ENSRNOG00000036666	NA	NA	predicted	-0.9814	miranda
rno-miR-23b-3p	MIMAT0000793	Btn3a2	406160	ENSRNOG00000029340	NA	NA	predicted	-0.9819	miranda
rno-miR-23b-3p	MIMAT0000793	Btnl8	406160	ENSRNOG00000029340	NA	NA	predicted	-0.9819	miranda
rno-miR-23b-3p	MIMAT0000793	Cdc42bpb	113960	ENSRNOG00000009675	NA	NA	predicted	-0.9823	miranda
rno-miR-23b-3p	MIMAT0000793	Npl	304860	ENSRNOG00000002775	NA	NA	predicted	-0.9889	miranda
rno-miR-23b-3p	MIMAT0000793	Gng10	114119	ENSRNOG00000025040	NA	NA	predicted	-0.9896	miranda
rno-miR-23b-3p	MIMAT0000793	Apold1	444983	ENSRNOG00000007830	NA	NA	predicted	-0.9898	miranda
rno-miR-23b-3p	MIMAT0000793	Havcr1	286934	ENSRNOG00000007243	NA	NA	predicted	-1.0043	miranda
rno-miR-23b-3p	MIMAT0000793	Ythdc1	170956	ENSRNOG00000001996	NA	NA	predicted	-1.0204	miranda
rno-miR-23b-3p	MIMAT0000793	Cyp2u1	310848	ENSRNOG00000011053	NA	NA	predicted	-1.0214	miranda
rno-miR-23b-3p	MIMAT0000793	Tnfsf4	89814	ENSRNOG00000002968	NA	NA	predicted	-1.0336	miranda
rno-miR-23b-3p	MIMAT0000793	Gnaz	25740	ENSRNOG00000001313	NA	NA	predicted	-1.0354	miranda
rno-miR-23b-3p	MIMAT0000793	Timm10	64464	ENSRNOG00000007883	NA	NA	predicted	-1.0529	miranda
rno-miR-23b-3p	MIMAT0000793	Zc3h14	192359	ENSRNOG00000004083	NA	NA	predicted	-1.0617	miranda
rno-miR-23b-3p	MIMAT0000793	Vps37a	290775	ENSRNOG00000012001	NA	NA	predicted	-1.0676	miranda
rno-miR-23b-3p	MIMAT0000793	Slc46a3	288454	ENSRNOG00000000937	NA	NA	predicted	-1.0707	miranda
rno-miR-23b-3p	MIMAT0000793	RSA-14-44	297173	ENSRNOG00000042954	NA	NA	predicted	-1.0728	miranda
rno-miR-23b-3p	MIMAT0000793	Cxcl2	114105	ENSRNOG00000002792	NA	NA	predicted	-1.1056	miranda
rno-miR-23b-3p	MIMAT0000793	Cdkn2aipnl	287278	ENSRNOG00000005024	NA	NA	predicted	-1.1513	miranda
rno-miR-23b-3p	MIMAT0000793	Neu3	117185	ENSRNOG00000018106	NA	NA	predicted	-1.1606	miranda
rno-miR-23b-3p	MIMAT0000793	Zcchc12	313436	ENSRNOG00000013162	NA	NA	predicted	-1.1633	miranda
rno-miR-23b-3p	MIMAT0000793	Ssr1	361233	ENSRNOG00000014165	NA	NA	predicted	-1.1832	miranda
rno-miR-23b-3p	MIMAT0000793	Ptpro	50677	ENSRNOG00000006231	NA	NA	predicted	-1.1917	miranda
rno-miR-23b-3p	MIMAT0000793	Ccl28	114492	ENSRNOG00000059640	NA	NA	predicted	-1.2249	miranda
rno-miR-23b-3p	MIMAT0000793	Ube2d3	81920	ENSRNOG00000013741	NA	NA	predicted	-1.225	miranda
rno-miR-23b-3p	MIMAT0000793	Uimc1	290997	ENSRNOG00000016891	NA	NA	predicted	-1.2629	miranda
rno-miR-23b-3p	MIMAT0000793	Atp1b3	25390	ENSRNOG00000011501	NA	NA	predicted	-1.2907	miranda
rno-miR-23b-3p	MIMAT0000793	Chek1	140583	ENSRNOG00000031896	NA	NA	predicted	-1.3133	miranda
rno-miR-23b-3p	MIMAT0000793	Adgrg2	266735	ENSRNOG00000032472	NA	NA	predicted	99.3418	mirdb
rno-miR-23b-3p	MIMAT0000793	Camta1	362665	ENSRNOG00000018602	NA	NA	predicted	99.216	mirdb
rno-miR-23b-3p	MIMAT0000793	Ppp4r4	500711	ENSRNOG00000054052	NA	NA	predicted	98.3229	mirdb
rno-miR-23b-3p	MIMAT0000793	Fam234b	362455	ENSRNOG00000008443	NA	NA	predicted	98.191	mirdb
rno-miR-23b-3p	MIMAT0000793	Gprin3	502784	ENSRNOG00000023657	NA	NA	predicted	97.9493	mirdb
rno-miR-23b-3p	MIMAT0000793	Thap12	308845	ENSRNOG00000053923	NA	NA	predicted	97.6348	mirdb
rno-miR-23b-3p	MIMAT0000793	Abhd18	499602	ENSRNOG00000013692	NA	NA	predicted	96.3533	mirdb
rno-miR-23b-3p	MIMAT0000793	Adgrl2	171447	ENSRNOG00000032660	NA	NA	predicted	95.5907	mirdb
rno-miR-23b-3p	MIMAT0000793	Sbno1	304470	ENSRNOG00000001064	NA	NA	predicted	95.2698	mirdb
[truncated: 78 more rows]
